# Supplementary material for: A biomimetic synthesis-enabled stereochemical assignment of rhodotomentones A and B, two unusual caryophyllene-derived meroterpenoids from Rhodomyrtus tomentosa
Source: Royal Society of Chemistry journal article supplement (doi:10.1039/d1qo00989c), 2021-01-01
Supplement: d1qo00989c1.pdf [file d1qo00989c1.pdf]

# **A Biomimetic Synthesis-Enabled Stereochemical Assignment of Rhodotomentones A and B, Two Unusual Caryophyllene-Derived Meroterpenoids from *Rhodomyrtus tomentosa***

Lu-Ming Deng,<sup>‡a,b</sup> Li-Jun Hu,<sup>‡a,b</sup> Wei Tang,<sup>‡a,b</sup> Jia-Xin Liu,<sup>a,b</sup> Xiao-Jun Huang,<sup>a,b</sup> Yue-Yue Li,<sup>b</sup> Yao-Lan Li,<sup>b</sup> Wen-Cai Ye,<sup>\*a,b</sup> and Ying Wang<sup>\*a,b</sup>

<sup>a</sup>*Center for Bioactive Natural Molecules and Innovative Drugs Research, College of Pharmacy, Jinan University, Guangzhou 510632, People's Republic of China.*

<sup>b</sup>*Guangdong Province Key Laboratory of Pharmacodynamic Constituents of TCM & New Drugs Research, Jinan University, Guangzhou 510632, People's Republic of China.*

## Contents

|                                                                                                |     |
|------------------------------------------------------------------------------------------------|-----|
| Table S1. $^1\text{H}$ and $^{13}\text{C}$ NMR spectral data of <b>1</b> .....                 | 3   |
| Figure S1. Key $^1\text{H}$ - $^1\text{H}$ COSY and HMBC correlations of <b>2</b> .....        | 3   |
| Figure S2. Key NOESY correlations of <b>2</b> .....                                            | 4   |
| Table S2. $^1\text{H}$ and $^{13}\text{C}$ NMR spectral data of <b>2</b> .....                 | 4   |
| Table S3. $^1\text{H}$ and $^{13}\text{C}$ NMR spectral data of <b>7</b> .....                 | 5   |
| Table S4. $^1\text{H}$ and $^{13}\text{C}$ NMR spectral data of <b>12</b> .....                | 5   |
| Table S5. $^1\text{H}$ and $^{13}\text{C}$ NMR spectral data of <b>13</b> .....                | 6   |
| Table S6. $^1\text{H}$ and $^{13}\text{C}$ NMR spectral data of <b>14</b> .....                | 7   |
| Table S7. $^1\text{H}$ and $^{13}\text{C}$ NMR spectral data of <b>15</b> .....                | 7   |
| Experimental section and results.....                                                          | 8   |
| 1. UPLC-UV-MS-guided isolation of Fr.B.....                                                    | 8   |
| 2. UPLC-QTOF/MS analysis of the methanol extract of <i>Rhodomyrtus tomentosa</i> .....         | 9   |
| 3. Quantum chemical ECD calculation.....                                                       | 10  |
| 4. HRMS, UV, IR, and NMR spectra of the natural <b>1-2</b> , <b>7</b> , and <b>12-15</b> ..... | 24  |
| 5. Synthetic experimental procedures.....                                                      | 45  |
| 5.1 General information.....                                                                   | 45  |
| 5.2 Syntheses of <b>7</b> and <b>12-15</b> .....                                               | 46  |
| 5.3 Syntheses of <b>1-2</b> and <b>16-17</b> through path A.....                               | 52  |
| 5.4 Syntheses of <b>8-11</b> and <b>18-21</b> .....                                            | 58  |
| 5.5 Syntheses of <b>1-2</b> and <b>16-17</b> through path B.....                               | 67  |
| 6. X-ray crystal structures of <b>7</b> , <b>16</b> , and <b>18</b> .....                      | 73  |
| 7. $^1\text{H}$ and $^{13}\text{C}$ NMR spectra of the synthetic compounds.....                | 74  |
| References.....                                                                                | 110 |

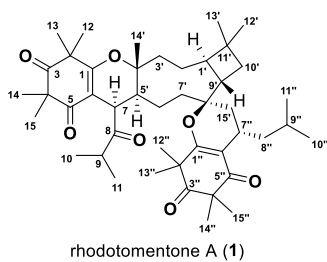

**Table S1.**  $^1\text{H}$  (300 MHz) and  $^{13}\text{C}$  (75 MHz) NMR spectral data of **1** in  $\text{CDCl}_3$  ( $\delta$  in ppm,  $J$  in Hz).

| position | $\delta_{\text{H}}$ | $\delta_{\text{C}}$ | position | $\delta_{\text{H}}$ | $\delta_{\text{C}}$ |
|----------|---------------------|---------------------|----------|---------------------|---------------------|
| 1        | –                   | 171.3               | 8'       | –                   | 83.3                |
| 2        | –                   | 48.0                | 9'       | 2.38 m              | 44.8                |
| 3        | –                   | 213.1               | 10'a     | 1.63 m              | 35.7                |
| 4        | –                   | 55.5                | 10'b     | 1.48 m              |                     |
| 5        | –                   | 197.2               | 11'      | –                   | 34.1                |
| 6        | –                   | 108.4               | 12'      | 0.94 s              | 22.4                |
| 7        | 4.07 d (7.2)        | 45.2                | 13'      | 0.97 s              | 30.1                |
| 8        | –                   | 216.0               | 14'      | 1.26 s              | 21.0                |
| 9        | 2.89 m              | 42.9                | 15'a     | 2.16 m              | 33.8                |
| 10       | 1.24 d (6.8)        | 20.4                | 15'b     | 1.55 m              |                     |
| 11       | 1.07 d (6.8)        | 18.3                | 1''      | –                   | 168.8               |
| 12       | 1.37 s              | 24.5                | 2''      | –                   | 48.2                |
| 13       | 1.42 s              | 25.6                | 3''      | –                   | 213.0               |
| 14       | 1.34 s              | 26.7                | 4''      | –                   | 55.4                |
| 15       | 1.29 s              | 26.0                | 5''      | –                   | 198.0               |
| 1'       | 1.82 m              | 48.7                | 6''      | –                   | 112.6               |
| 2'a      | 1.70 m              | 23.4                | 7''      | 2.85 m              | 25.6                |
| 2'b      | 1.40 m              |                     | 8''a     | 1.64 m              | 43.7                |
| 3'a      | 2.18 m              | 40.8                | 8''b     | 1.03 m              |                     |
| 3'b      | 1.73 m              |                     | 9''      | 1.69 m              | 25.9                |
| 4'       | –                   | 84.3                | 10''     | 0.92 d (6.0)        | 24.1                |
| 5'       | 2.15 m              | 43.2                | 11''     | 0.98 d (6.0)        | 21.3                |
| 6'a      | 1.87 m              | 21.5                | 12''     | 1.36 s              | 24.9                |
| 6'b      | 1.78 m              |                     | 13''     | 1.31 s              | 21.9                |
| 7'a      | 2.11 m              | 39.5                | 14''     | 1.31 s              | 22.9                |
| 7'b      | 1.91 m              |                     | 15''     | 1.32 s              | 26.0                |

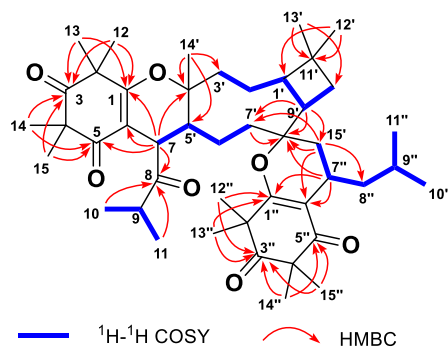

**Figure S1.** Key  $^1\text{H}$ - $^1\text{H}$  COSY and HMBC correlations of **2**.

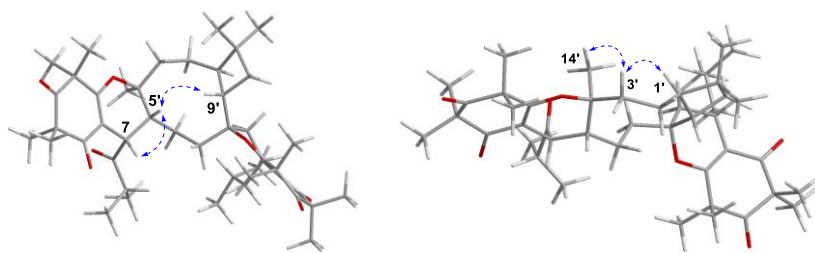

**Figure S2.** Key NOESY correlations of **2**.

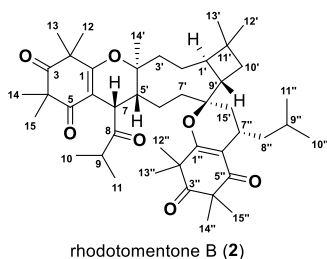

**Table S2.**  $^1\text{H}$  (500 MHz) and  $^{13}\text{C}$  (125 MHz) NMR spectral data of **2** in  $\text{CDCl}_3$  ( $\delta$  in ppm,  $J$  in Hz).

| position | $\delta_{\text{H}}$ | $\delta_{\text{C}}$ | position | $\delta_{\text{H}}$ | $\delta_{\text{C}}$ |
|----------|---------------------|---------------------|----------|---------------------|---------------------|
| 1        | –                   | 171.7               | 8'       | –                   | 82.8                |
| 2        | –                   | 48.0                | 9'       | 2.58 m              | 47.5                |
| 3        | –                   | 212.9               | 10'a     | 1.60 m              | 34.6                |
| 4        | –                   | 55.5                | 10'b     | 1.39 m              |                     |
| 5        | –                   | 197.4               | 11'      | –                   | 34.0                |
| 6        | –                   | 107.9               | 12'      | 0.95 s              | 22.9                |
| 7        | 4.22 d (7.0)        | 42.6                | 13'      | 0.97 s              | 29.3                |
| 8        | –                   | 216.3               | 14'      | 1.14 s              | 21.0                |
| 9        | 2.71 m              | 42.7                | 15'a     | 1.98 m              | 23.6                |
| 10       | 1.32 d (6.5)        | 21.3                | 15'b     | 1.89 m              |                     |
| 11       | 1.03 d (6.5)        | 17.4                | 1''      | –                   | 169.8               |
| 12       | 1.37 s              | 25.2                | 2''      | –                   | 48.1                |
| 13       | 1.44 s              | 25.5                | 3''      | –                   | 213.3               |
| 14       | 1.36 s              | 27.3                | 4''      | –                   | 55.5                |
| 15       | 1.31 s              | 20.8                | 5''      | –                   | 197.9               |
| 1'       | 1.74 m              | 48.6                | 6''      | –                   | 110.7               |
| 2'a      | 1.53 m              | 23.0                | 7''      | 2.95 m              | 25.3                |
| 2'b      | 1.25 m              |                     | 8''a     | 1.49 m              | 42.5                |
| 3'a      | 2.11 m              | 40.7                | 8''b     | 1.10 m              |                     |
| 3'b      | 1.73 m              |                     | 9''      | 1.70 m              | 26.1                |
| 4'       | –                   | 83.4                | 10''     | 0.91 d (6.2)        | 24.1                |
| 5'       | 2.21 m              | 40.6                | 11''     | 1.03 d (6.2)        | 21.3                |
| 6'a      | 1.28 m              | 29.9                | 12''     | 1.39 s              | 24.9                |
| 6'b      | 1.25 m              |                     | 13''     | 1.30 s              | 25.5                |
| 7'a      | 2.27 m              | 36.7                | 14''     | 1.33 s              | 22.7                |
| 7'b      | 1.72 m              |                     | 15''     | 1.36 s              | 26.5                |

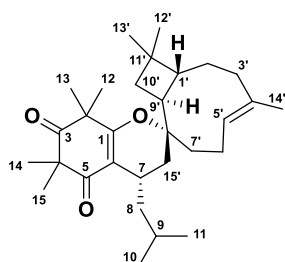

**Table S3.**  $^1\text{H}$  (400 MHz) and  $^{13}\text{C}$  (100 MHz) NMR spectral data of **7** in  $\text{CDCl}_3$  ( $\delta$  in ppm,  $J$  in Hz).

| position | $\delta_{\text{H}}$       | $\delta_{\text{C}}$ | position | $\delta_{\text{H}}$ | $\delta_{\text{C}}$ |
|----------|---------------------------|---------------------|----------|---------------------|---------------------|
| 1        | –                         | 169.2               | 3'a      | c                   | b                   |
| 2        | –                         | 48.1                | 3'b      | c                   |                     |
| 3        | –                         | 213.8               | 4'       | –                   | b                   |
| 4        | –                         | 55.5                | 5'       | 5.20 brs            | b                   |
| 5        | –                         | 197.9               | 6'a      | c                   | b                   |
| 6        | –                         | 109.9               | 6'b      | c                   |                     |
| 7        | 2.91 m                    | 24.6                | 7'a      | c                   | b                   |
| 8a       | 1.40 <sup>a</sup> m       | 42.3                | 7'b      | c                   |                     |
| 8b       | 1.24 <sup>a</sup> m       |                     | 8'       | –                   | b                   |
| 9        | 1.83 <sup>a</sup> m       | 25.7                | 9'       | c                   | b                   |
| 10       | 1.08 d (6.4)              | 21.0                | 10'a     | 1.67 <sup>a</sup> m | 37.4                |
| 11       | 0.97 <sup>a</sup> d (6.4) | 24.2                | 10'b     | 1.35 <sup>a</sup> m |                     |
| 12       | 1.26 s                    | 25.4                | 11'      | –                   | 32.7                |
| 13       | 1.32 <sup>a</sup> s       | 25.3                | 12'      | 0.90 brs            | 29.9                |
| 14       | 1.32 <sup>a</sup> s       | 26.8                | 13'      | 0.96 <sup>a</sup> s | 22.8                |
| 15       | 1.31 <sup>a</sup> s       | 22.4                | 14'      | 1.71 s              | b                   |
| 1'       | c                         | b                   | 15'a     | c                   | b                   |
| 2'       | c                         | b                   | 15'b     | c                   |                     |

<sup>a)</sup> Overlapped signals, <sup>b)</sup> Signals invisible, <sup>c)</sup> Signals unassigned

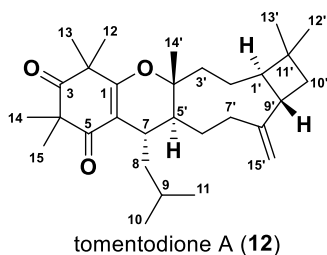

**Table S4.**  $^1\text{H}$  (400 MHz) and  $^{13}\text{C}$  (100 MHz) NMR spectral data of **12** in  $\text{CDCl}_3$  ( $\delta$  in ppm,  $J$  in Hz).

| position | $\delta_{\text{H}}$ | $\delta_{\text{C}}$ | position | $\delta_{\text{H}}$ | $\delta_{\text{C}}$ |
|----------|---------------------|---------------------|----------|---------------------|---------------------|
| 1        | –                   | 170.5               | 3'a      | 2.08 <sup>a</sup> m | 37.5                |
| 2        | –                   | 47.7                | 3'b      | 1.90 m              |                     |
| 3        | –                   | 214.1               | 4'       | –                   | 83.1                |
| 4        | –                   | 55.3                | 5'       | 2.08 <sup>a</sup> m | 40.4                |
| 5        | –                   | 197.6               | 6'a      | 1.74 m              | 33.1                |
| 6        | –                   | 113.7               | 6'b      | 1.43 <sup>a</sup> m |                     |
| 7        | 2.26 m              | 34.6                | 7'a      | 2.47 m              | 35.4                |
| 8        | 1.82 m              | 38.9                | 7'b      | 2.12 <sup>a</sup> m |                     |

|     |                     |      |      |                     |       |
|-----|---------------------|------|------|---------------------|-------|
|     | 1.31 <sup>a</sup> m |      | 8'   | –                   | 152.3 |
| 9   | 1.47 <sup>a</sup> m | 25.6 | 9'   | 2.39 m              | 42.5  |
| 10  | 0.75 d (6.6)        | 24.2 | 10'a | 1.68 m              | 36.4  |
| 11  | 0.83 d (6.6)        | 24.1 | 10'b | 1.61 m              |       |
| 12  | 1.37 s              | 24.1 | 11'  | –                   | 33.6  |
| 13  | 1.32 s              | 25.6 | 12'  | 0.98 <sup>a</sup> s | 30.5  |
| 14  | 1.31 s              | 23.4 | 13'  | 0.98 <sup>a</sup> s | 22.3  |
| 15  | 1.33 s              | 26.2 | 14'  | 1.06 s              | 21.0  |
| 1'  | 2.03 m              | 52.2 | 15'a | 4.91 s              | 110.8 |
| 2'a | 1.78 <sup>a</sup> m | 22.4 | 15'b | 4.88 s              |       |
| 2'b | 1.40 <sup>a</sup> m |      |      |                     |       |

<sup>a</sup>) Overlapped signals

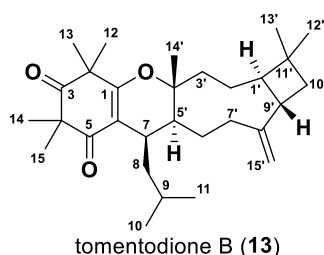

**Table S5.** <sup>1</sup>H (400 MHz) and <sup>13</sup>C (100 MHz) NMR spectral data of **13** in CDCl<sub>3</sub> ( $\delta$  in ppm,  $J$  in Hz).

| position | $\delta_H$                | $\delta_C$ | position | $\delta_H$          | $\delta_C$ |
|----------|---------------------------|------------|----------|---------------------|------------|
| 1        | –                         | 170.4      | 3'a      | 2.03 m              | 46.3       |
| 2        | –                         | 47.7       | 3'b      | 1.39 <sup>a</sup> m |            |
| 3        | –                         | 213.8      | 4'       | –                   | 86.4       |
| 4        | –                         | 55.5       | 5'       | 1.74 <sup>a</sup> m | 39.8       |
| 5        | –                         | 197.2      | 6'       | 1.66 m              | 25.3       |
| 6        | –                         | 116.4      |          |                     |            |
| 7        | 2.88 m                    | 28.4       | 7'a      | 2.33 m              | 35.4       |
| 8a       | 1.40 <sup>a</sup> m       | 41.0       | 7'b      | 2.13 m              |            |
| 8b       | 1.10 m                    |            | 8'       | –                   | 150.8      |
| 9        | 1.47 <sup>a</sup> m       | 26.7       | 9'       | 2.40 m              | 42.4       |
| 10       | 0.82 d (6.0)              | 24.7       | 10'a     | 1.72 <sup>a</sup> m | 36.2       |
| 11       | 0.97 <sup>a</sup> d (6.0) | 21.7       | 10'b     | 1.59 <sup>a</sup> m |            |
| 12       | 1.32 <sup>a</sup> s       | 25.0       | 11'      | –                   | 34.5       |
| 13       | 1.35 s                    | 25.5       | 12'      | 0.94 s              | 29.8       |
| 14       | 1.32 <sup>a</sup> s       | 23.8       | 13'      | 0.97 <sup>a</sup> s | 21.9       |
| 15       | 1.32 s                    | 25.5       | 14'      | 1.35 s              | 23.4       |
| 1'       | 1.49 <sup>a</sup> m       | 58.2       | 15'a     | 4.91 s              | 111.1      |
| 2'       | 1.55–1.61 <sup>a</sup> m  | 24.2       | 15'b     | 4.90 s              |            |

<sup>a</sup>) Overlapped signals

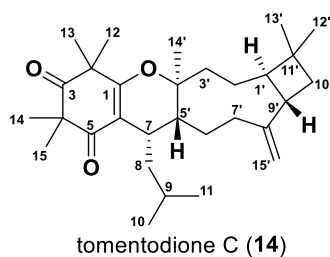

**Table S6.**  $^1\text{H}$  (300 MHz) and  $^{13}\text{C}$  (75 MHz) NMR spectral data of **14** in  $\text{CDCl}_3$  ( $\delta$  in ppm,  $J$  in Hz).

| position | $\delta_{\text{H}}$       | $\delta_{\text{C}}$ | position | $\delta_{\text{H}}$ | $\delta_{\text{C}}$ |
|----------|---------------------------|---------------------|----------|---------------------|---------------------|
| 1        | –                         | 169.8               | 3'a      | 2.03 m              | 41.6                |
| 2        | –                         | 47.9                | 3'b      | 1.76 m              |                     |
| 3        | –                         | 213.7               | 4'       | –                   | 85.5                |
| 4        | –                         | 55.5                | 5'       | 2.10 <sup>a</sup> m | 38.5                |
| 5        | –                         | 198.0               | 6'a      | 1.70 <sup>a</sup> m | 29.2                |
| 6        | –                         | 114.8               | 6'b      | 1.51 <sup>a</sup> m |                     |
| 7        | 2.98 m                    | 29.3                | 7'a      | 2.35 m              | 36.4                |
| 8a       | 1.49 <sup>a</sup> m       | 42.1                | 7'b      | 2.12 <sup>a</sup> m |                     |
| 8b       | 1.08 m                    |                     | 8'       | –                   | 154.9               |
| 9        | 1.67 <sup>a</sup> m       | 27.6                | 9'       | 2.57 q (9.2)        | 42.9                |
| 10       | 0.95 d (6.2)              | 24.3                | 10'a     | 1.73 m              | 38.6                |
| 11       | 0.87 <sup>a</sup> d (6.2) | 21.9                | 10'b     | 1.65 m              |                     |
| 12       | 1.35 <sup>a</sup> s       | 25.5                | 11'      | –                   | 33.5                |
| 13       | 1.37 s                    | 26.2                | 12'      | 0.96 s              | 29.6                |
| 14       | 1.35 <sup>a</sup> s       | 22.9                | 13'      | 0.88 s              | 22.3                |
| 15       | 1.34 s                    | 25.2                | 14'      | 1.25 s              | 23.7                |
| 1'       | 1.54 <sup>a</sup> m       | 56.9                | 15'a     | 4.83 brs            | 110.2               |
| 2'a      | 1.44 <sup>a</sup> m       | 23.4                | 15'b     | 4.73 brs            |                     |
| 2'b      | 1.19 m                    |                     |          |                     |                     |

<sup>a</sup>) Overlapped signals

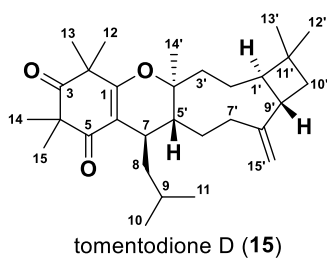

**Table S7.**  $^1\text{H}$  (400 MHz) and  $^{13}\text{C}$  (100 MHz) NMR spectral data of **15** in  $\text{CDCl}_3$  ( $\delta$  in ppm,  $J$  in Hz).

| position | $\delta_{\text{H}}$ | $\delta_{\text{C}}$ | position | $\delta_{\text{H}}$ | $\delta_{\text{C}}$ |
|----------|---------------------|---------------------|----------|---------------------|---------------------|
| 1        | –                   | 170.4               | 3'a      | 2.13 <sup>a</sup> m | 39.4                |
| 2        | –                   | 47.7                | 3'b      | 1.77 m              |                     |
| 3        | –                   | 214.1               | 4'       | –                   | 83.5                |
| 4        | –                   | 55.3                | 5'       | 2.09 <sup>a</sup> m | 40.0                |
| 5        | –                   | 197.6               | 6'a      | 1.65 <sup>a</sup> m | 34.5                |
| 6        | –                   | 113.4               | 6'b      | 1.47 <sup>a</sup> m |                     |
| 7        | 2.28 m              | 35.1                | 7'a      | 2.40 m              | 36.4                |
| 8a       | 1.88 <sup>a</sup> m | 39.4                | 7'b      | 2.19 m              |                     |

|    |                     |      |      |                     |       |
|----|---------------------|------|------|---------------------|-------|
| 8b | 1.40 <sup>a</sup> m |      | 8'   | –                   | 155.0 |
| 9  | 1.56 <sup>a</sup> m | 25.7 | 9'   | 2.71 q (9.6)        | 42.8  |
| 10 | 0.89 d (6.6)        | 24.1 | 10'a | 1.92 m              | 40.4  |
| 11 | 0.79 d (6.6)        | 24.0 | 10'b | 1.56 <sup>a</sup> m |       |
| 12 | 1.38 s              | 24.0 | 11'  | –                   | 33.5  |
| 13 | 1.31 <sup>a</sup> s | 25.5 | 12'  | 1.00 s              | 29.8  |
| 14 | 1.34 s              | 25.9 | 13'  | 0.97 s              | 22.4  |
| 15 | 1.31 <sup>a</sup> s | 23.7 | 14'  | 1.03 s              | 19.9  |
| 1' | 1.61 <sup>a</sup> m | 54.6 | 15'a | 4.83 s              | 110.3 |
| 2' | 1.52 <sup>a</sup> m | 22.1 | 15'b | 4.68 s              |       |

<sup>a</sup>) Overlapped signals

## Experimental section and results

### 1. UPLC-UV-MS-guided isolation of Fr.B

Fr.B was speculated to contain caryophyllene-derived meroterpenoids (CDMTs) on the basis of its UPLC-QTOF/MS analysis result, which showed a unique UV profile ( $\lambda_{\max}$  265 nm) as well as the typical ion peak at  $m/z$  719.4926  $[M+H]^+$  (Figure S3).

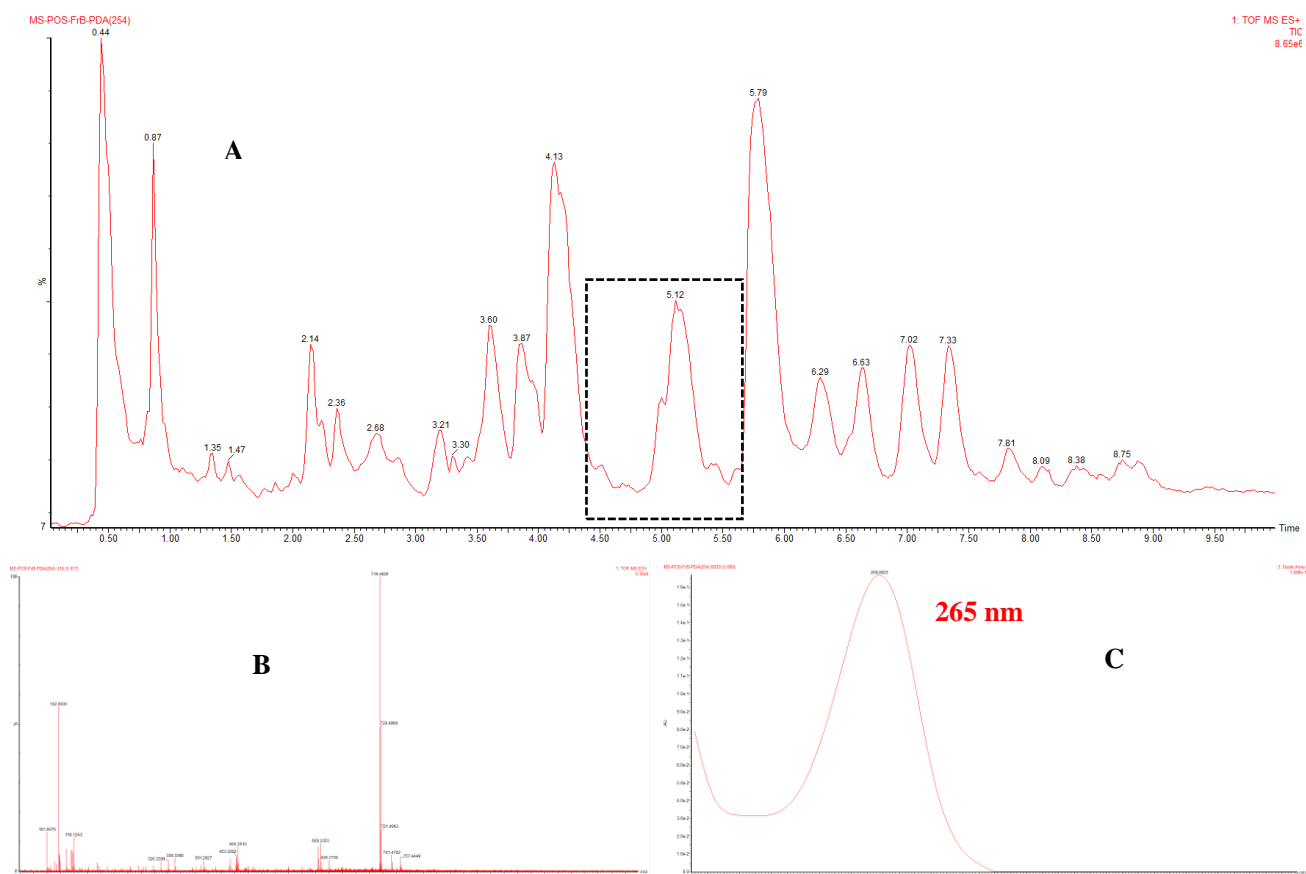

**Figure S3.** **A:** UPLC-QTOF/MS analysis for Fr.B; **B** and **C:** Fr.B showed a typical ion peak at  $m/z$  719.4926  $[M+H]^+$  as well as a unique UV profile.



## 2. UPLC-QTOF/MS analysis of the methanol extract of *Rhodomyrtus tomentosa*

**Preparation of the sample solution:** The fresh leaves and twigs of *Rhodomyrtus tomentosa* (100 g) were cut into pieces and extracted using methanol by ultrasonic extraction at room temperature for 1 h. The extract was then concentrated *in vacuo* and filtered through a 0.22  $\mu\text{m}$  membrane prior for further UPLC-QTOF/MS analysis.

**UPLC condition:** UPLC analysis was performed on a Waters Acquity UPLC system equipped with a binary solvent system, an automatic sample manger and a photodiode array detector (PDA). Chromatographic separation was achieved on a SB-C18 column (100 mm  $\times$  2.1 mm, 1.8  $\mu\text{m}$ ). The mobile phases consisted of (A) 0.1% formic acid-water and (B) MeOH. The UPLC elution program was optimized as linear gradient from 80 to 100% B (0–20 min). The flow rate was set at 0.3 mL/min.

**MS condition:** HRESIMS analysis was performed on a Waters Xevo-G2 QTOF mass spectrometer equipped with ESI source. Mass spectra were recorded across the range from 100 to 1000 Da. Samples were analyzed in positive mode and the operating parameters were set as follow: capillary voltage of 3.0 kV; sample cone voltage of 30 V; extraction cone voltage of 4 V, source temperature of 100  $^{\circ}\text{C}$ , desolvation temperature 350  $^{\circ}\text{C}$ , cone gas flow of 30 L/h and desolvation gas flow of 600 L/h.

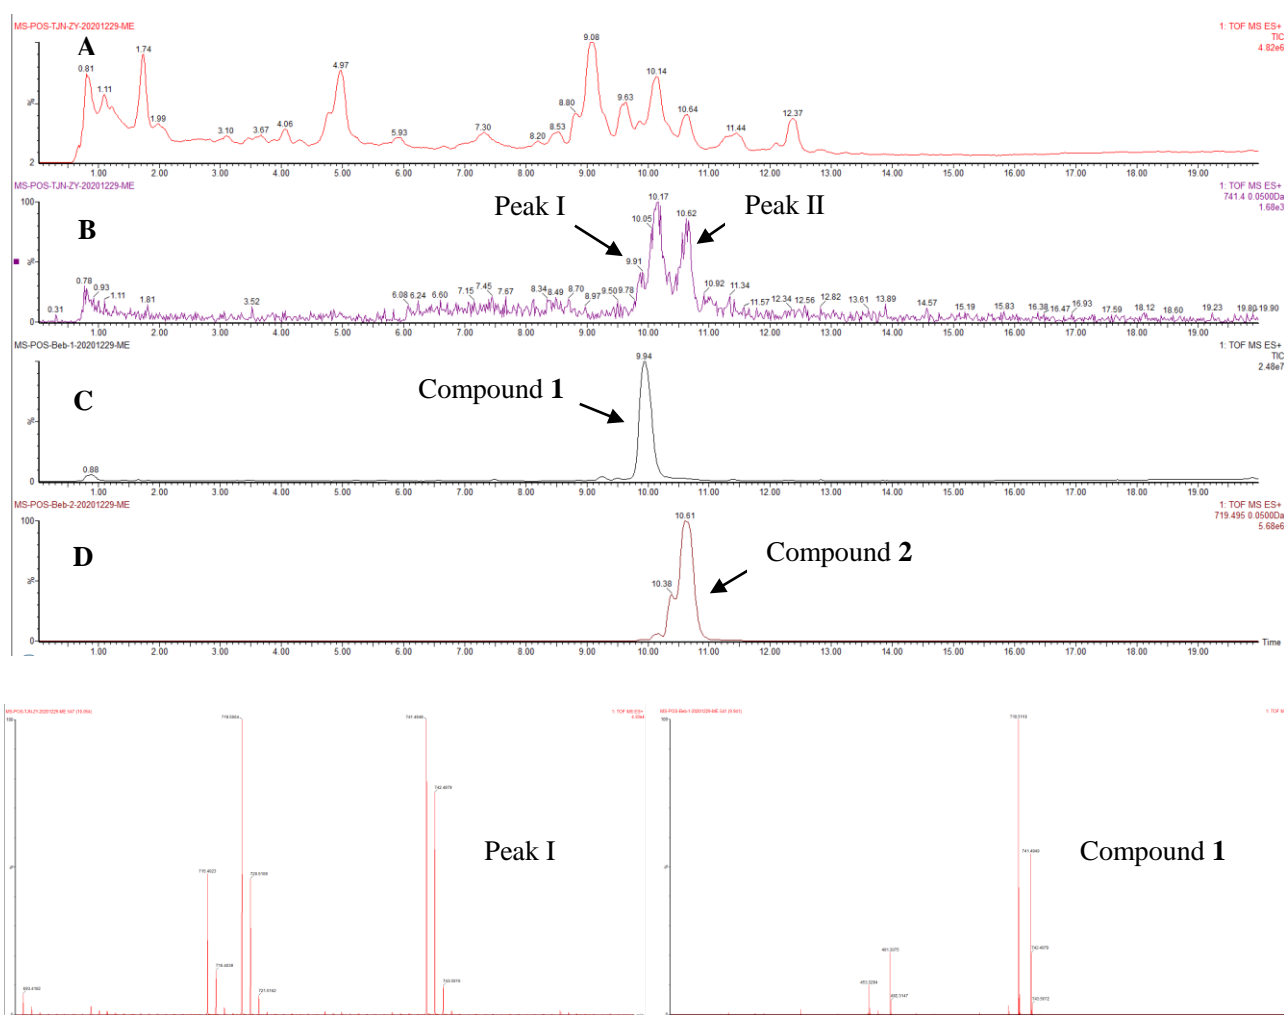

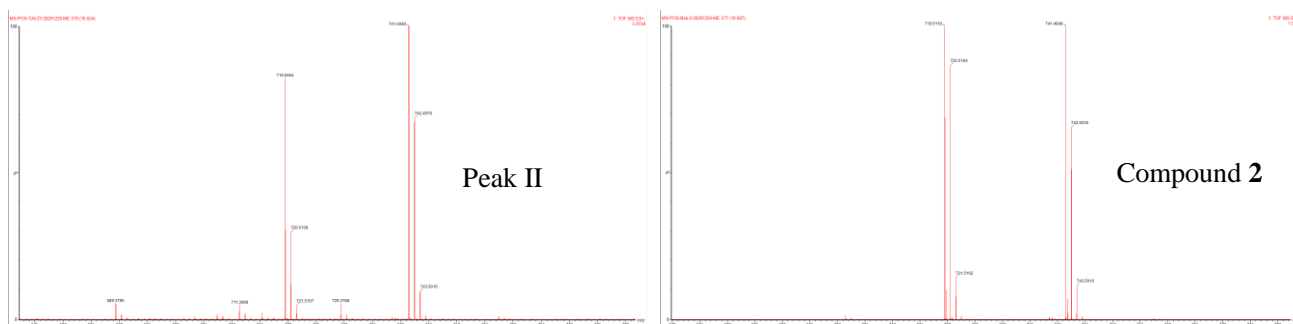

**Figure S4.** UPLC-QTOF/MS analysis of the methanol extract the fresh leaves and twigs of *Rhodomyrtus tomentosa* (**A**: Total ion chromatogram; **B**: Extracted ion chromatogram, Peak I: retention time: 10.054 min,  $m/z$  741.4949  $[M+Na]^+$ ; Peak II retention time: 10.624 min,  $m/z$  741.4949  $[M+Na]^+$ ; **C**: Ion chromatogram of compound **1** (retention time: 9.941 min),  $m/z$  741.4949  $[M+Na]^+$ ; **D**: Ion chromatogram of compound **2** (retention time: 10.607 min),  $m/z$  741.4949  $[M+Na]^+$ ).

### 3. Quantum chemical ECD calculation

On the account of the ECD spectra of two enantiomers are mirror images by definition, one of the two plausible stereoisomers of **1** and **2** ( $7R,1'R,4'R,5'S,8'R,9'S,7''S$ -**1**,  $7S,1'R,4'S,5'R,8'R,9'S,7''S$ -**2**) were arbitrarily selected for the following calculation. The systematic random conformational analysis of the selected stereoisomers of **1** and **2** were performed in the SYBYL-X 2.1.1 program by using MMFF94s molecular force field with an energy cutoff of 10 kcal/mol to the global minima, which afforded 25 and 18 conformers, respectively. All of the obtained conformers were further optimized using DFT at the B3LYP/6-31+G(d) level in gas phase using Gaussian09 software,<sup>1</sup> which afforded 12 and 12 stable conformers for **1** and **2**, respectively. The optimized stable conformers of the selected stereoisomers of **1** and **2** were further subjected to ECD calculations at the B3LYP/6-31+G(d) level with the PCM solvation model of methanol (**1** and **2**). The first 50 excitations for **1** and **2** were considered. The overall ECD curves of **1** and **2** were all weighted by Boltzmann distribution. The calculated ECD spectra were subsequently compared with the experimental ones. The ECD spectra were produced by SpecDis 1.70 software.<sup>2</sup>

**Table S8.** Cartesian coordinate of dominant conformer of ( $7R,1'R,4'R,5'S,8'R,9'S,7''S$ )-**1**.

| Cartesian coordinate of <b>1a</b> |               |                         |           |           | Cartesian coordinate of <b>1b</b> |               |                         |          |          |
|-----------------------------------|---------------|-------------------------|-----------|-----------|-----------------------------------|---------------|-------------------------|----------|----------|
| Standard orientation              |               |                         |           |           | Standard orientation              |               |                         |          |          |
| Center Number                     | Atomic Number | Coordinates (Angstroms) |           |           | Center Number                     | Atomic Number | Coordinates (Angstroms) |          |          |
|                                   |               | X                       | Y         | Z         |                                   |               | X                       | Y        | Z        |
| 1                                 | 6             | 6.474854                | -0.002606 | -1.398835 | 1                                 | 6             | 6.742389                | -1.20209 | 0.289961 |
| 2                                 | 6             | 6.693882                | 0.102814  | 0.116672  | 2                                 | 6             | 6.829298                | 0.305778 | 0.107805 |
| 3                                 | 6             | 5.420044                | 0.35479   | 0.948622  | 3                                 | 6             | 5.599023                | 0.847594 | -0.59812 |
| 4                                 | 6             | 4.1301                  | 0.046077  | 0.324974  | 4                                 | 6             | 4.2658                  | 0.325906 | -0.19257 |
| 5                                 | 6             | 3.987988                | 0.08826   | -1.024716 | 5                                 | 6             | 4.199861                | -0.90032 | 0.357961 |
| 6                                 | 6             | 5.112322                | 0.438743  | -1.983195 | 6                                 | 6             | 5.377459                | -1.83438 | 0.60191  |
| 7                                 | 6             | 2.958522                | -0.177195 | 1.235425  | 7                                 | 6             | 3.055162                | 1.174364 | -0.51211 |
| 8                                 | 6             | 1.620362                | -0.032726 | 0.474631  | 8                                 | 6             | 1.741866                | 0.367391 | -0.28107 |
| 9                                 | 6             | 1.641088                | -0.620695 | -0.952195 | 9                                 | 6             | 1.851275                | -0.6284  | 0.913766 |

|    |   |           |           |           |    |   |          |          |          |
|----|---|-----------|-----------|-----------|----|---|----------|----------|----------|
| 10 | 8 | 2.823427  | -0.059908 | -1.681776 | 10 | 8 | 3.001351 | -1.47776 | 0.738812 |
| 11 | 8 | 7.365496  | -0.36593  | -2.134129 | 11 | 8 | 7.76175  | -1.90016 | 0.265474 |
| 12 | 8 | 5.512165  | 0.772869  | 2.089123  | 12 | 8 | 5.663277 | 1.731812 | -1.44978 |
| 13 | 6 | 4.904457  | -0.260867 | -3.326655 | 13 | 6 | 5.410807 | -2.27557 | 2.07725  |
| 14 | 6 | 5.155116  | 1.962352  | -2.156198 | 14 | 6 | 5.224986 | -3.07276 | -0.30327 |
| 15 | 6 | 3.153418  | -1.494262 | 2.004169  | 15 | 6 | 3.150291 | 2.530834 | 0.218509 |
| 16 | 6 | 7.270313  | -1.235049 | 0.606662  | 16 | 6 | 6.949466 | 0.977458 | 1.481562 |
| 17 | 6 | 7.677021  | 1.258689  | 0.350638  | 17 | 6 | 8.079796 | 0.641915 | -0.72526 |
| 18 | 6 | 3.604515  | -1.333199 | 3.461623  | 18 | 6 | 3.502944 | 3.767455 | -0.61712 |
| 19 | 6 | 2.356884  | -1.242331 | 4.346845  | 19 | 6 | 2.264723 | 4.625    | -0.84967 |
| 20 | 6 | 4.503054  | -2.509194 | 3.8554    | 20 | 6 | 4.593733 | 4.572099 | 0.087288 |
| 21 | 6 | 0.412039  | -0.516808 | 1.286137  | 21 | 6 | 0.457709 | 1.22936  | -0.29422 |
| 22 | 6 | -0.579537 | 0.586505  | 1.671823  | 22 | 6 | -0.55423 | 0.937589 | -1.43328 |
| 23 | 6 | 0.401941  | 1.375177  | -2.059718 | 23 | 6 | 0.412881 | -2.6531  | -0.0531  |
| 24 | 6 | 0.496434  | -0.13396  | -1.840018 | 24 | 6 | 0.631604 | -1.59168 | 1.03096  |
| 25 | 6 | -1.801492 | 0.74898   | 0.757555  | 25 | 6 | -1.82771 | 0.094803 | -1.097   |
| 26 | 6 | -1.620979 | 1.684492  | -0.430846 | 26 | 6 | -1.61008 | -1.42615 | -1.32298 |
| 27 | 6 | -0.18952  | 2.097463  | -0.867903 | 27 | 6 | -0.19082 | -2.11    | -1.33763 |
| 28 | 6 | -1.981    | 3.180914  | -0.259636 | 28 | 6 | -1.76808 | -2.00694 | -2.77008 |
| 29 | 6 | -0.669914 | 3.584428  | -1.003595 | 29 | 6 | -0.7782  | -3.14225 | -2.37523 |
| 30 | 8 | -1.958991 | -0.614321 | 0.17245   | 30 | 8 | -2.15574 | 0.336982 | 0.288031 |
| 31 | 6 | -3.184236 | -0.991225 | -0.273646 | 31 | 6 | -3.43774 | 0.076798 | 0.746024 |
| 32 | 6 | -4.326103 | -0.291727 | -0.085101 | 32 | 6 | -4.47774 | -0.11215 | -0.08867 |
| 33 | 6 | -4.358712 | 0.962797  | 0.75509   | 33 | 6 | -4.35037 | 0.00982  | -1.59126 |
| 34 | 6 | -3.056571 | 1.063836  | 1.580547  | 34 | 6 | -2.99107 | 0.624155 | -1.96433 |
| 35 | 6 | -3.093765 | -2.28335  | -1.059369 | 35 | 6 | -3.50393 | -0.06174 | 2.260159 |
| 36 | 6 | -4.446423 | -3.036164 | -0.991422 | 36 | 6 | -4.93893 | 0.179877 | 2.748007 |
| 37 | 6 | -5.743534 | -2.21545  | -1.024292 | 37 | 6 | -6.09147 | -0.38874 | 1.935679 |
| 38 | 6 | -5.559479 | -0.70095  | -0.776304 | 38 | 6 | -5.75422 | -0.63795 | 0.47584  |
| 39 | 6 | 1.780128  | -2.127413 | -1.058029 | 39 | 6 | 1.995461 | 0.042757 | 2.29826  |
| 40 | 1 | -2.180857 | 1.247639  | -1.287763 | 40 | 1 | -2.28259 | -1.96719 | -0.63869 |
| 41 | 1 | 0.53317   | 2.022684  | -0.018172 | 41 | 1 | 0.555071 | -1.51627 | -1.86794 |
| 42 | 1 | 1.510055  | 1.079417  | 0.324684  | 42 | 1 | 1.732315 | -0.25218 | -1.17838 |
| 43 | 6 | 0.20013   | 4.58417   | -0.249411 | 43 | 6 | 0.201288 | -3.50882 | -3.4913  |
| 44 | 6 | -0.923811 | 4.060615  | -2.427549 | 44 | 6 | -1.46618 | -4.39847 | -1.83424 |
| 45 | 6 | -5.579018 | 1.016147  | 1.699644  | 45 | 6 | -5.50193 | 0.730326 | -2.35104 |
| 46 | 6 | -6.31559  | 2.373843  | 1.649202  | 46 | 6 | -5.5878  | 2.272171 | -2.3107  |
| 47 | 6 | -7.639464 | 2.282136  | 2.429524  | 47 | 6 | -6.75556 | 2.738678 | -3.18998 |
| 48 | 6 | -5.448704 | 3.518622  | 2.197905  | 48 | 6 | -5.76069 | 2.837745 | -0.90512 |
| 49 | 6 | -2.820897 | -1.954645 | -2.532396 | 49 | 6 | -3.06542 | -1.46779 | 2.69357  |
| 50 | 6 | -1.999459 | -3.182944 | -0.486519 | 50 | 6 | -2.59211 | 0.981145 | 2.944445 |
| 51 | 6 | -6.375748 | -2.423967 | -2.407009 | 51 | 6 | -6.54036 | -1.7092  | 2.579114 |
| 52 | 6 | -6.662707 | -2.724903 | 0.096446  | 52 | 6 | -7.25662 | 0.614521 | 1.979887 |
| 53 | 8 | -6.41652  | 0.08323   | -1.131532 | 53 | 8 | -6.52121 | -1.27121 | -0.25115 |
| 54 | 8 | -4.471228 | -4.24586  | -0.953257 | 54 | 8 | -5.16118 | 0.743224 | 3.825106 |

|    |   |           |           |           |    |   |          |          |          |
|----|---|-----------|-----------|-----------|----|---|----------|----------|----------|
| 55 | 8 | 2.799009  | -2.568711 | 1.571721  | 55 | 8 | 2.953658 | 2.639342 | 1.42943  |
| 56 | 1 | 2.973663  | 0.647072  | 2.000223  | 56 | 1 | 3.071711 | 1.403844 | -1.58719 |
| 57 | 1 | 5.731835  | -0.045748 | -4.016118 | 57 | 1 | 6.281982 | -2.90778 | 2.285813 |
| 58 | 1 | 3.966644  | 0.05556   | -3.800263 | 58 | 1 | 4.519191 | -2.85171 | 2.350289 |
| 59 | 1 | 4.85861   | -1.350878 | -3.209641 | 59 | 1 | 5.469136 | -1.41414 | 2.751962 |
| 60 | 1 | 4.233524  | 2.327973  | -2.628569 | 60 | 1 | 4.284307 | -3.60332 | -0.11564 |
| 61 | 1 | 5.263164  | 2.485031  | -1.19882  | 61 | 1 | 5.246358 | -2.79135 | -1.36313 |
| 62 | 1 | 5.98908   | 2.263576  | -2.803476 | 62 | 1 | 6.037697 | -3.79101 | -0.14307 |
| 63 | 1 | 8.195687  | -1.486129 | 0.067526  | 63 | 1 | 7.803267 | 0.581598 | 2.043205 |
| 64 | 1 | 6.56898   | -2.063963 | 0.453681  | 64 | 1 | 6.055796 | 0.82138  | 2.095369 |
| 65 | 1 | 7.516801  | -1.194178 | 1.675929  | 65 | 1 | 7.081488 | 2.060979 | 1.381119 |
| 66 | 1 | 8.624251  | 1.093325  | -0.178664 | 66 | 1 | 8.997083 | 0.296241 | -0.23466 |
| 67 | 1 | 7.26845   | 2.220577  | 0.02426   | 67 | 1 | 8.033788 | 0.166519 | -1.71238 |
| 68 | 1 | 7.909964  | 1.357472  | 1.422216  | 68 | 1 | 8.181421 | 1.721941 | -0.88334 |
| 69 | 1 | 4.194914  | -0.385556 | 3.564945  | 69 | 1 | 3.888922 | 3.45218  | -1.5909  |
| 70 | 1 | 2.634353  | -1.197531 | 5.408205  | 70 | 1 | 2.524086 | 5.556929 | -1.36295 |
| 71 | 1 | 1.767155  | -0.346114 | 4.128777  | 71 | 1 | 1.538733 | 4.096533 | -1.47536 |
| 72 | 1 | 1.707438  | -2.119382 | 4.225269  | 72 | 1 | 1.768839 | 4.879799 | 0.093234 |
| 73 | 1 | 4.849566  | -2.415001 | 4.890582  | 73 | 1 | 4.920741 | 5.410862 | -0.53605 |
| 74 | 1 | 5.391657  | -2.565953 | 3.215757  | 74 | 1 | 5.467467 | 3.947417 | 0.299816 |
| 75 | 1 | 3.974134  | -3.467273 | 3.763365  | 75 | 1 | 4.240176 | 4.978484 | 1.041429 |
| 76 | 1 | -0.116699 | -1.332143 | 0.747106  | 76 | 1 | -0.03147 | 1.227029 | 0.681852 |
| 77 | 1 | 0.749138  | -1.001998 | 2.219563  | 77 | 1 | 0.744529 | 2.274334 | -0.43471 |
| 78 | 1 | -0.935765 | 0.363913  | 2.695657  | 78 | 1 | -0.90729 | 1.93824  | -1.72415 |
| 79 | 1 | -0.064855 | 1.562775  | 1.747848  | 79 | 1 | -0.05279 | 0.564942 | -2.33344 |
| 80 | 1 | -0.204903 | 1.557502  | -2.966254 | 80 | 1 | -0.26289 | -3.40418 | 0.373523 |
| 81 | 1 | 1.40703   | 1.785524  | -2.282534 | 81 | 1 | 1.350307 | -3.17621 | -0.27265 |
| 82 | 1 | 0.598389  | -0.618168 | -2.82937  | 82 | 1 | 0.770221 | -2.17531 | 1.953257 |
| 83 | 1 | -0.454579 | -0.511003 | -1.400586 | 83 | 1 | -0.28195 | -1.01779 | 1.186675 |
| 84 | 1 | -2.908355 | 3.491576  | -0.744146 | 84 | 1 | -2.77441 | -2.33341 | -3.04739 |
| 85 | 1 | -2.020448 | 3.522705  | 0.783547  | 85 | 1 | -1.39444 | -1.34389 | -3.56055 |
| 86 | 1 | -4.41601  | 1.825736  | 0.046614  | 86 | 1 | -4.36291 | -1.02334 | -1.96471 |
| 87 | 1 | -2.977676 | 2.071098  | 2.030817  | 87 | 1 | -2.79419 | 0.482441 | -3.03324 |
| 88 | 1 | -3.114386 | 0.356067  | 2.431911  | 88 | 1 | -3.04824 | 1.706533 | -1.7976  |
| 89 | 1 | 2.746623  | -2.479648 | -0.65843  | 89 | 1 | 2.972343 | 0.513429 | 2.431965 |
| 90 | 1 | 1.019037  | -2.656704 | -0.467653 | 90 | 1 | 1.208166 | 0.776237 | 2.490629 |
| 91 | 1 | 1.721277  | -2.477338 | -2.09221  | 91 | 1 | 1.952409 | -0.70626 | 3.099123 |
| 92 | 1 | 1.180564  | 4.697888  | -0.727456 | 92 | 1 | 0.998535 | -4.15615 | -3.1104  |
| 93 | 1 | -0.266585 | 5.576527  | -0.222887 | 93 | 1 | -0.31013 | -4.03952 | -4.30165 |
| 94 | 1 | 0.377179  | 4.284435  | 0.78947   | 94 | 1 | 0.674015 | -2.62129 | -3.92599 |
| 95 | 1 | -1.550039 | 3.356588  | -2.985956 | 95 | 1 | -2.18191 | -4.17347 | -1.03757 |
| 96 | 1 | -1.439142 | 5.02795   | -2.434207 | 96 | 1 | -2.01613 | -4.91166 | -2.63093 |
| 97 | 1 | 0.013315  | 4.183166  | -2.980293 | 97 | 1 | -0.73017 | -5.10208 | -1.43044 |
| 98 | 1 | -6.29997  | 0.219741  | 1.433287  | 98 | 1 | -5.39958 | 0.443496 | -3.40807 |
| 99 | 1 | -5.281236 | 0.787541  | 2.737121  | 99 | 1 | -6.4701  | 0.320521 | -2.04322 |

|     |   |           |           |           |     |   |          |          |          |
|-----|---|-----------|-----------|-----------|-----|---|----------|----------|----------|
| 100 | 1 | -6.55769  | 2.593463  | 0.579547  | 100 | 1 | -4.67842 | 2.699191 | -2.74801 |
| 101 | 1 | -8.196585 | 3.224484  | 2.378338  | 101 | 1 | -7.71291 | 2.362934 | -2.81282 |
| 102 | 1 | -8.29104  | 1.501001  | 2.020816  | 102 | 1 | -6.8086  | 3.832312 | -3.21878 |
| 103 | 1 | -7.475707 | 2.056779  | 3.488699  | 103 | 1 | -6.63352 | 2.385344 | -4.21941 |
| 104 | 1 | -6.001386 | 4.465164  | 2.202991  | 104 | 1 | -5.86863 | 3.927588 | -0.93745 |
| 105 | 1 | -4.551583 | 3.670889  | 1.589536  | 105 | 1 | -4.89625 | 2.622634 | -0.27243 |
| 106 | 1 | -5.127238 | 3.325122  | 3.226885  | 106 | 1 | -6.6567  | 2.430253 | -0.42896 |
| 107 | 1 | -2.816762 | -2.864231 | -3.14692  | 107 | 1 | -1.98699 | -1.60885 | 2.575047 |
| 108 | 1 | -1.837492 | -1.481219 | -2.653123 | 108 | 1 | -3.55738 | -2.24933 | 2.104668 |
| 109 | 1 | -3.56803  | -1.26915  | -2.949093 | 109 | 1 | -3.3076  | -1.65092 | 3.746953 |
| 110 | 1 | -2.17481  | -3.402493 | 0.574315  | 110 | 1 | -2.87777 | 2.002159 | 2.664002 |
| 111 | 1 | -1.967777 | -4.148178 | -1.010915 | 111 | 1 | -2.65371 | 0.912017 | 4.037143 |
| 112 | 1 | -1.009394 | -2.71554  | -0.566124 | 112 | 1 | -1.538   | 0.841341 | 2.680332 |
| 113 | 1 | -6.570046 | -3.485718 | -2.604466 | 113 | 1 | -6.70021 | -1.59689 | 3.657568 |
| 114 | 1 | -5.743645 | -2.037362 | -3.213064 | 114 | 1 | -5.7975  | -2.50069 | 2.438091 |
| 115 | 1 | -7.33803  | -1.893138 | -2.475144 | 115 | 1 | -7.4777  | -2.06943 | 2.139169 |
| 116 | 1 | -6.870085 | -3.798402 | -0.023    | 116 | 1 | -8.06937 | 0.325006 | 1.304146 |
| 117 | 1 | -6.213394 | -2.588114 | 1.086784  | 117 | 1 | -7.67755 | 0.695849 | 2.988977 |
| 118 | 1 | -7.628009 | -2.201981 | 0.088394  | 118 | 1 | -6.92464 | 1.616891 | 1.689796 |

**Table S9.** Key transitions and their related rotatory and oscillator strengths of dominant conformer of **1a**.

| HOMO is 196 |                            |                 |            |               |                                                 |
|-------------|----------------------------|-----------------|------------|---------------|-------------------------------------------------|
| No.         | Energy (cm <sup>-1</sup> ) | Wavelength (nm) | R (length) | Osc. Strength | Major contribs                                  |
| 1           | 32621.9                    | 306.5           | 12.7571    | 0.0046        | H-4->L+4 (19%), H-1->LUMO (12%), H-1->L+4 (55%) |
| 2           | 32676.7                    | 306.0           | -8.887     | 0.0005        | H-2->L+1 (86%)                                  |
| 3           | 32811.4                    | 304.8           | 8.2387     | 0.0005        | H-3->LUMO (81%)                                 |
| 4           | 33873.7                    | 295.2           | 0.5905     | 0.0008        | H-5->L+3 (42%), H-2->L+3 (48%)                  |
| 5           | 33892.2                    | 295.1           | -0.5648    | 0.0003        | H-6->L+2 (35%), H-3->L+2 (54%)                  |
| 6           | 36369.2                    | 275.0           | -0.2714    | 0.0878        | H-1->LUMO (59%), H-1->L+2 (23%)                 |
| 7           | 36448.2                    | 274.4           | 8.13       | 0.0128        | HOMO->L+1 (11%), HOMO->L+3 (83%)                |
| 8           | 37017.6                    | 270.1           | -12.0153   | 0.0308        | H-1->LUMO (11%), H-1->L+2 (66%), H-1->L+4 (11%) |
| 9           | 37769.3                    | 264.8           | 1.6895     | 0.0016        | HOMO->LUMO (98%)                                |
| 10          | 38679.9                    | 258.5           | 88.6734    | 0.3665        | HOMO->L+1 (77%), HOMO->L+3 (10%)                |
| 11          | 38817.9                    | 257.6           | -0.3026    | 0.0026        | H-1->L+1 (97%)                                  |
| 12          | 39436.5                    | 253.6           | -1.719     | 0.0062        | H-6->LUMO (79%), H-3->LUMO (12%)                |
| 13          | 39968.0                    | 250.2           | 18.8989    | 0.0487        | H-4->LUMO (21%), H-4->L+4 (33%), H-1->L+4 (17%) |
| 14          | 40005.1                    | 250.0           | -20.8487   | 0.0147        | H-5->L+1 (74%), H-2->L+3 (12%)                  |
| 15          | 40214.0                    | 248.7           | -15.1277   | 0.0073        | H-5->L+3 (51%), H-2->L+3 (35%)                  |
| 16          | 40460.8                    | 247.2           | 0.1242     | 0.0004        | HOMO->L+2 (96%)                                 |
| 17          | 40674.5                    | 245.9           | -0.0855    | 0.0001        | H-1->L+3 (99%)                                  |
| 18          | 40802.0                    | 245.1           | 12.2543    | 0.005         | H-6->L+2 (54%), H-3->L+2 (36%)                  |
| 19          | 41114.9                    | 243.2           | 0.5381     | 0.0104        | H-2->LUMO (93%)                                 |
| 20          | 41329.5                    | 242.0           | -5.4462    | 0.1385        | H-4->LUMO (41%), H-3->L+4 (36%)                 |
| 21          | 41761.8                    | 239.5           | -0.4109    | 0.001         | HOMO->L+4 (96%)                                 |

|    |         |       |         |        |                                                                    |
|----|---------|-------|---------|--------|--------------------------------------------------------------------|
| 22 | 42198.9 | 237.0 | -9.0456 | 0.0726 | H-4->LUMO (13%), H-4->L+2 (10%), H-4->L+4 (19%), H-3->L+4 (40%)    |
| 23 | 42799.0 | 233.7 | -0.0177 | 0.0004 | H-3->L+1 (97%)                                                     |
| 24 | 43082.9 | 232.1 | -4.9854 | 0.0164 | H-4->L+2 (77%), H-4->L+4 (13%)                                     |
| 25 | 43671.7 | 229.0 | -0.0475 | 0.0001 | H-2->L+2 (98%)                                                     |
| 26 | 43859.6 | 228.0 | 0.1724  | 0.0011 | H-4->L+1 (97%)                                                     |
| 27 | 44363.7 | 225.4 | -0.128  | 0.0001 | H-5->LUMO (99%)                                                    |
| 28 | 44612.9 | 224.2 | 0.013   | 0      | H-3->L+3 (99%)                                                     |
| 29 | 45250.1 | 221.0 | -0.0352 | 0      | H-2->L+4 (99%)                                                     |
| 30 | 45729.2 | 218.7 | -0.1353 | 0.0002 | H-4->L+3 (99%)                                                     |
| 31 | 46111.5 | 216.9 | 1.6517  | 0.003  | H-7->LUMO (75%), H-6->L+1 (19%)                                    |
| 32 | 46129.3 | 216.8 | -2.4227 | 0.0016 | H-7->LUMO (19%), H-6->L+1 (76%)                                    |
| 33 | 46571.3 | 214.7 | 5.7792  | 0.0078 | H-9->L+1 (30%), H-8->L+1 (61%)                                     |
| 34 | 46762.4 | 213.8 | 0.4056  | 0.0011 | H-6->L+4 (36%), H-1->L+5 (46%)                                     |
| 35 | 46799.5 | 213.7 | -1.3052 | 0.0027 | H-6->L+4 (52%), H-1->L+5 (32%)                                     |
| 36 | 46932.6 | 213.1 | 0.0194  | 0      | H-5->L+2 (99%)                                                     |
| 37 | 47025.3 | 212.7 | 4.3606  | 0.0102 | H-7->L+1 (93%)                                                     |
| 38 | 47126.2 | 212.2 | -7.5128 | 0.0059 | HOMO->L+5 (58%), HOMO->L+6 (37%)                                   |
| 39 | 47256.8 | 211.6 | 2.1053  | 0.0007 | H-11->LUMO (11%), H-10->LUMO (17%), H-8->LUMO (65%)                |
| 40 | 47874.7 | 208.9 | -26.025 | 0.0115 | H-9->L+1 (52%), H-8->L+1 (31%)                                     |
| 41 | 47961.0 | 208.5 | 0.2794  | 0      | H-6->L+3 (95%)                                                     |
| 42 | 47965.8 | 208.5 | 2.122   | 0.0012 | H-11->LUMO (23%), H-10->LUMO (31%), H-8->LUMO (31%)                |
| 43 | 48435.2 | 206.5 | -0.0259 | 0      | H-5->L+4 (99%)                                                     |
| 44 | 49039.3 | 203.9 | -0.9273 | 0.0012 | HOMO->L+5 (20%), HOMO->L+6 (35%), HOMO->L+7 (17%), HOMO->L+8 (17%) |
| 45 | 49178.8 | 203.3 | 2.761   | 0.0044 | H-7->L+2 (24%), H-1->L+7 (11%), HOMO->L+7 (33%)                    |
| 46 | 49182.9 | 203.3 | -5.3813 | 0.0012 | H-7->L+2 (12%), H-1->L+6 (14%), H-1->L+7 (19%), HOMO->L+7 (25%)    |
| 47 | 49200.6 | 203.2 | 3.283   | 0.0025 | H-7->L+2 (61%), H-1->L+6 (11%), H-1->L+7 (16%)                     |
| 48 | 49399.8 | 202.4 | -0.1318 | 0.0012 | H-8->L+3 (16%), H-7->L+3 (79%)                                     |
| 49 | 49412.8 | 202.4 | 0.1273  | 0.0036 | H-10->LUMO (10%), H-9->LUMO (69%)                                  |
| 50 | 49538.6 | 201.9 | 3.5442  | 0.0056 | H-1->L+6 (12%), H-1->L+7 (26%), H-1->L+8 (42%)                     |

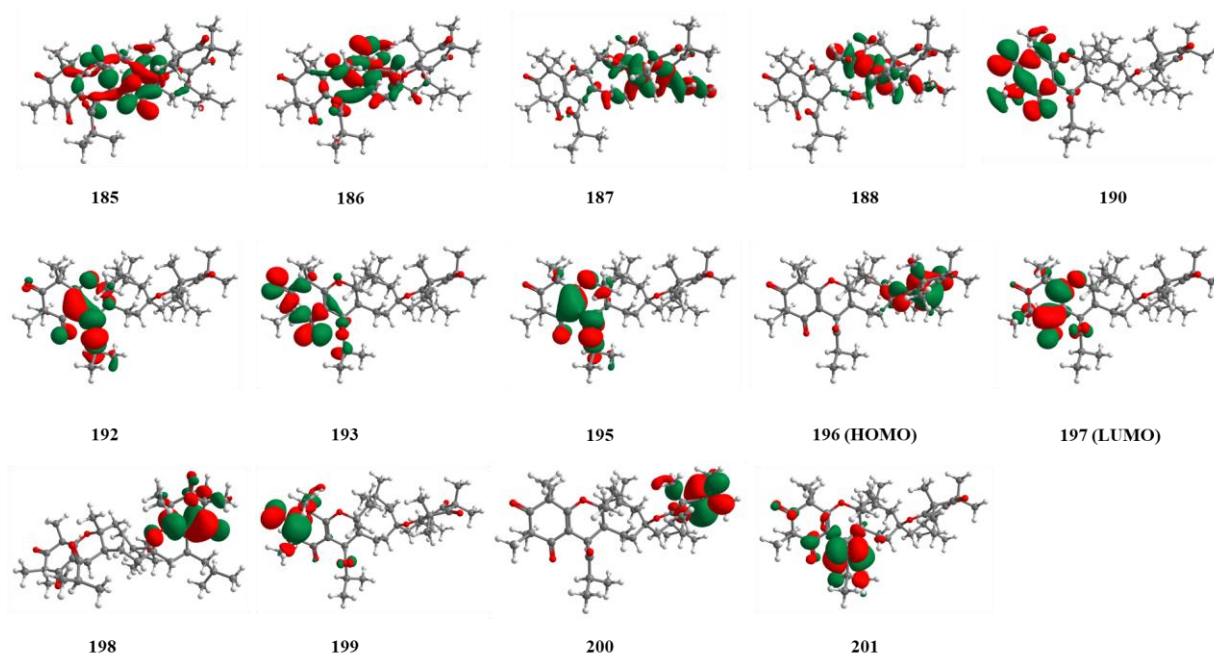

**Figure S5.** Key molecular orbitals involved in important transitions regarding the ECD spectrum of dominant conformer of **1a**.

**Table S10.** Key transitions and their related rotatory and oscillator strengths of dominant conformer of **1b**.

| HOMO is 196 |                            |                 |            |               |                                                                                |
|-------------|----------------------------|-----------------|------------|---------------|--------------------------------------------------------------------------------|
| No.         | Energy (cm <sup>-1</sup> ) | Wavelength (nm) | R (length) | Osc. Strength | Major contribs                                                                 |
| 1           | 32300.1                    | 309.6           | -13.0488   | 0.0007        | H-2->L+1 (86%)                                                                 |
| 2           | 32657.4                    | 306.2           | 22.7729    | 0.0014        | H-4->L+4 (11%), H-3->LUMO (38%), H-1->L+4 (32%)                                |
| 3           | 32685.6                    | 305.9           | -3.8957    | 0.0023        | H-4->L+4 (11%), H-3->LUMO (46%), H-1->L+4 (29%)                                |
| 4           | 33887.4                    | 295.1           | 16.8454    | 0.0042        | H-5->L+1 (10%), H-5->L+2 (11%), H-5->L+3 (27%), H-2->L+2 (14%), H-2->L+3 (35%) |
| 5           | 34211.6                    | 292.3           | 16.2518    | 0.0073        | H-6->LUMO (22%), H-6->L+2 (12%), H-3->L+2 (35%), H-3->L+3 (14%)                |
| 6           | 35719.1                    | 280.0           | -7.9618    | 0.0784        | H-1->LUMO (76%)                                                                |
| 7           | 35920.7                    | 278.4           | -5.8011    | 0.0206        | HOMO->L+1 (24%), HOMO->L+2 (21%), HOMO->L+3 (54%)                              |
| 8           | 37166.0                    | 269.1           | 0.0097     | 0.0005        | HOMO->LUMO (99%)                                                               |
| 9           | 37485.4                    | 266.8           | 12.1043    | 0.0214        | H-4->LUMO (13%), H-1->L+2 (51%), H-1->L+3 (20%)                                |
| 10          | 38158.9                    | 262.1           | 83.5298    | 0.3084        | HOMO->L+1 (63%), HOMO->L+3 (16%)                                               |
| 11          | 38542.8                    | 259.5           | -0.1021    | 0.0001        | H-1->L+1 (100%)                                                                |
| 12          | 39564.7                    | 252.8           | -0.7173    | 0.0184        | H-6->LUMO (53%), H-4->LUMO (15%), H-3->L+2 (10%)                               |
| 13          | 39749.4                    | 251.6           | -3.8847    | 0.0032        | H-5->L+1 (68%), H-2->L+3 (20%)                                                 |
| 14          | 40100.3                    | 249.4           | 16.7337    | 0.0239        | H-6->LUMO (10%), H-4->L+4 (45%), H-1->L+4 (18%)                                |
| 15          | 40492.3                    | 247.0           | -0.833     | 0.0015        | HOMO->L+2 (62%), HOMO->L+3 (25%)                                               |
| 16          | 40558.4                    | 246.6           | -2.5974    | 0.0094        | H-2->LUMO (87%)                                                                |
| 17          | 40627.8                    | 246.1           | 23.2781    | 0.084         | H-5->L+1 (15%), H-5->L+2 (12%), H-5->L+3 (29%), H-2->L+3 (12%)                 |
| 18          | 40706.0                    | 245.7           | -41.3269   | 0.0619        | H-4->LUMO (32%), H-2->LUMO (11%)                                               |

|    |         |       |          |        |                                                                    |
|----|---------|-------|----------|--------|--------------------------------------------------------------------|
| 19 | 40764.1 | 245.3 | -2.7713  | 0.0009 | H-1->L+2 (26%), H-1->L+3 (71%)                                     |
| 20 | 41110.1 | 243.2 | -0.6655  | 0.0005 | HOMO->L+4 (90%)                                                    |
| 21 | 41832.8 | 239.0 | -0.0811  | 0.0169 | H-3->L+4 (80%)                                                     |
| 22 | 42484.4 | 235.4 | -28.1082 | 0.0867 | H-6->L+2 (31%), H-6->L+3 (12%), H-4->LUMO (18%)                    |
| 23 | 42714.3 | 234.1 | -0.1764  | 0.0005 | H-3->L+1 (97%)                                                     |
| 24 | 43628.9 | 229.2 | -3.3212  | 0.0015 | H-4->L+1 (95%)                                                     |
| 25 | 43665.2 | 229.0 | -7.155   | 0.0357 | H-4->L+2 (49%), H-4->L+3 (19%)                                     |
| 26 | 43845.9 | 228.1 | -1.3755  | 0.0036 | H-2->L+2 (61%), H-2->L+3 (24%)                                     |
| 27 | 44208.1 | 226.2 | -0.4674  | 0.0007 | H-5->LUMO (99%)                                                    |
| 28 | 44645.2 | 224.0 | 0.0102   | 0      | H-2->L+4 (97%)                                                     |
| 29 | 44886.4 | 222.8 | 0.0002   | 0      | H-3->L+2 (28%), H-3->L+3 (72%)                                     |
| 30 | 45860.7 | 218.1 | -0.1228  | 0.0002 | H-4->L+2 (28%), H-4->L+3 (71%)                                     |
| 31 | 46010.7 | 217.3 | 0.2098   | 0.0039 | H-7->LUMO (94%)                                                    |
| 32 | 46262.3 | 216.2 | -1.0115  | 0.0005 | H-6->L+1 (96%)                                                     |
| 33 | 46518.0 | 215.0 | -11.569  | 0.0067 | HOMO->L+5 (62%), HOMO->L+6 (32%)                                   |
| 34 | 46648.7 | 214.4 | 4.3574   | 0.0011 | H-9->L+1 (17%), H-8->L+1 (19%), H-7->L+1 (57%)                     |
| 35 | 46673.7 | 214.3 | -3.0735  | 0.0014 | H-1->L+5 (73%), H-1->L+6 (20%)                                     |
| 36 | 46825.3 | 213.6 | 26.4496  | 0.0189 | H-8->L+1 (62%), H-7->L+1 (29%)                                     |
| 37 | 46885.8 | 213.3 | -7.604   | 0.006  | H-6->L+4 (84%)                                                     |
| 38 | 47231.0 | 211.7 | 4.3142   | 0.0021 | H-11->LUMO (13%), H-8->LUMO (73%)                                  |
| 39 | 47478.6 | 210.6 | 0.0164   | 0.0001 | H-5->L+2 (68%), H-5->L+3 (27%)                                     |
| 40 | 47769.0 | 209.3 | -27.4031 | 0.0102 | H-9->L+1 (66%), H-8->L+1 (14%)                                     |
| 41 | 47915.0 | 208.7 | 5.7215   | 0.0012 | H-11->LUMO (46%), H-10->LUMO (17%), H-8->LUMO (25%)                |
| 42 | 48226.3 | 207.4 | -0.0855  | 0      | H-5->L+4 (96%)                                                     |
| 43 | 48412.6 | 206.6 | -3.9896  | 0.0009 | HOMO->L+5 (10%), HOMO->L+6 (16%), HOMO->L+7 (43%), HOMO->L+8 (17%) |
| 44 | 48459.4 | 206.4 | 0.0463   | 0.0001 | H-6->L+2 (28%), H-6->L+3 (71%)                                     |
| 45 | 48693.3 | 205.4 | 0.5409   | 0.0024 | HOMO->L+6 (26%), HOMO->L+7 (42%), HOMO->L+8 (18%)                  |
| 46 | 49066.7 | 203.8 | 3.2949   | 0.0064 | H-1->L+6 (26%), H-1->L+7 (37%), H-1->L+8 (20%)                     |
| 47 | 49174.8 | 203.4 | 3.8444   | 0.0019 | HOMO->L+5 (14%), HOMO->L+6 (15%), HOMO->L+8 (43%)                  |
| 48 | 49307.9 | 202.8 | -4.2227  | 0.004  | H-2->L+5 (39%), H-2->L+6 (35%)                                     |
| 49 | 49408.7 | 202.4 | 3.8163   | 0.005  | H-1->L+7 (31%), H-1->L+8 (46%)                                     |
| 50 | 49524.1 | 201.9 | -2.2151  | 0.0032 | H-7->L+2 (41%), H-7->L+3 (47%)                                     |



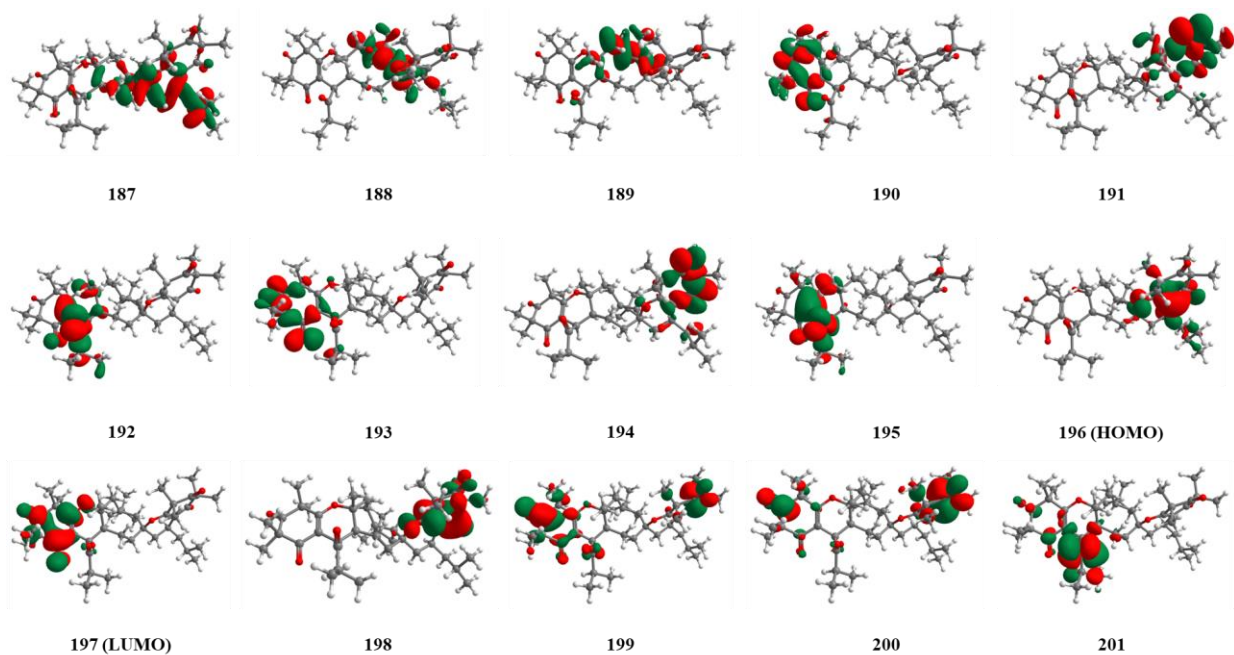

**Figure S6.** Key molecular orbitals involved in important transitions regarding the ECD spectrum of dominant conformer of **1b**.

**Table S11.** Cartesian coordinate of dominant conformer of (7*S*,1'*R*,4'*S*,5'*R*,8'*R*,9'*S*,7''*S*)-**2**.

| Cartesian coordinate of <b>2a</b> |               |                         |          |          | Cartesian coordinate of <b>2b</b> |               |                         |          |          |
|-----------------------------------|---------------|-------------------------|----------|----------|-----------------------------------|---------------|-------------------------|----------|----------|
| Standard orientation              |               |                         |          |          | Standard orientation              |               |                         |          |          |
| Center Number                     | Atomic Number | Coordinates (Angstroms) |          |          | Center Number                     | Atomic Number | Coordinates (Angstroms) |          |          |
|                                   |               | X                       | Y        | Z        |                                   |               | X                       | Y        | Z        |
| 1                                 | 6             | 6.576121                | 0.120396 | -1.52448 | 1                                 | 6             | 6.521907                | -0.24593 | -1.46092 |
| 2                                 | 6             | 6.133709                | -1.33535 | -1.52179 | 2                                 | 6             | 6.006851                | -1.67004 | -1.31389 |
| 3                                 | 6             | 4.623549                | -1.46508 | -1.44442 | 3                                 | 6             | 4.491106                | -1.71701 | -1.25265 |
| 4                                 | 6             | 3.874266                | -0.52743 | -0.56578 | 4                                 | 6             | 3.778179                | -0.65727 | -0.49022 |
| 5                                 | 6             | 4.434907                | 0.640081 | -0.22036 | 5                                 | 6             | 4.39205                 | 0.511514 | -0.25836 |
| 6                                 | 6             | 5.799139                | 1.137987 | -0.67531 | 6                                 | 6             | 5.785125                | 0.8923   | -0.73843 |
| 7                                 | 6             | 2.499403                | -0.95279 | -0.12247 | 7                                 | 6             | 2.378148                | -0.9669  | -0.03032 |
| 8                                 | 6             | 1.686282                | 0.261789 | 0.399473 | 8                                 | 6             | 1.621063                | 0.332459 | 0.353097 |
| 9                                 | 6             | 2.525436                | 1.285491 | 1.217527 | 9                                 | 6             | 2.501396                | 1.393654 | 1.074577 |
| 10                                | 8             | 3.801007                | 1.553918 | 0.586464 | 10                                | 8             | 3.79424                 | 1.534611 | 0.437182 |
| 11                                | 8             | 7.593621                | 0.467455 | -2.13453 | 11                                | 8             | 7.563907                | -0.01513 | -2.08448 |
| 12                                | 8             | 4.00884                 | -2.35237 | -2.03395 | 12                                | 8             | 3.840349                | -2.62963 | -1.75896 |
| 13                                | 6             | 5.604328                | 2.402006 | -1.5374  | 13                                | 6             | 5.664396                | 2.065163 | -1.73272 |
| 14                                | 6             | 6.676769                | 1.478667 | 0.54334  | 14                                | 6             | 6.662549                | 1.318421 | 0.453195 |
| 15                                | 6             | 2.675489                | -2.12724 | 0.861021 | 15                                | 6             | 2.481619                | -2.04328 | 1.068755 |
| 16                                | 6             | 6.629587                | -2.01249 | -2.81317 | 16                                | 6             | 6.48624                 | -2.50354 | -2.51698 |
| 17                                | 6             | 6.750456                | -2.05063 | -0.31354 | 17                                | 6             | 6.569621                | -2.2823  | -0.02535 |
| 18                                | 6             | 0.345816                | -0.14928 | 1.054768 | 18                                | 6             | 0.255149                | 0.056337 | 1.026474 |
| 19                                | 6             | -0.79132                | -0.23751 | 0.030228 | 19                                | 6             | -0.87468                | -0.07371 | -0.00124 |
| 20                                | 6             | 0.642383                | 2.996227 | 2.05499  | 20                                | 6             | 0.69926                 | 3.271792 | 1.709009 |
| 21                                | 6             | 1.870581                | 2.711488 | 1.193862 | 21                                | 6             | 1.917275                | 2.839572 | 0.895981 |

|    |   |          |          |          |    |   |          |          |          |
|----|---|----------|----------|----------|----|---|----------|----------|----------|
| 22 | 6 | -1.8596  | 0.882269 | 0.139447 | 22 | 6 | -1.88888 | 1.100325 | -0.00391 |
| 23 | 6 | -1.14108 | 2.26276  | 0.047292 | 23 | 6 | -1.10711 | 2.428749 | -0.23298 |
| 24 | 6 | -0.70227 | 3.089774 | 1.323138 | 24 | 6 | -0.63333 | 3.36065  | 0.955022 |
| 25 | 6 | -2.02913 | 3.493927 | -0.32597 | 25 | 6 | -1.93232 | 3.656951 | -0.73701 |
| 26 | 6 | -1.07735 | 4.395007 | 0.515643 | 26 | 6 | -0.93576 | 4.591623 | 0.011933 |
| 27 | 8 | -2.64713 | 0.78668  | -1.05994 | 27 | 8 | -2.69609 | 0.925901 | -1.18282 |
| 28 | 6 | -3.85139 | 0.114054 | -1.0844  | 28 | 6 | -3.85366 | 0.173892 | -1.13059 |
| 29 | 6 | -4.42891 | -0.39179 | 0.018567 | 29 | 6 | -4.39526 | -0.2461  | 0.025937 |
| 30 | 6 | -3.80059 | -0.30283 | 1.393075 | 30 | 6 | -3.83201 | 0.089822 | 1.38827  |
| 31 | 6 | -2.73914 | 0.805882 | 1.40102  | 31 | 6 | -2.77164 | 1.193185 | 1.255214 |
| 32 | 6 | -4.41399 | 0.041517 | -2.49332 | 32 | 6 | -4.43429 | -0.05892 | -2.51809 |
| 33 | 6 | -5.68861 | -0.80416 | -2.58764 | 33 | 6 | -5.69556 | -0.93569 | -2.52302 |
| 34 | 6 | -6.56361 | -0.97551 | -1.35744 | 34 | 6 | -6.03132 | -1.75494 | -1.28593 |
| 35 | 6 | -5.79565 | -0.98999 | -0.04972 | 35 | 6 | -5.67017 | -1.01964 | -0.0076  |
| 36 | 6 | 2.840853 | 0.852356 | 2.65445  | 36 | 6 | 2.782212 | 1.095016 | 2.55231  |
| 37 | 1 | -0.33316 | 2.185678 | -0.6954  | 37 | 1 | -0.30099 | 2.237077 | -0.95675 |
| 38 | 1 | -1.43639 | 2.960722 | 2.1364   | 38 | 1 | -1.37894 | 3.356628 | 1.768164 |
| 39 | 1 | 1.444058 | 0.812287 | -0.52262 | 39 | 1 | 1.415944 | 0.796944 | -0.6238  |
| 40 | 6 | -1.81627 | 5.428927 | 1.36802  | 40 | 6 | -1.62103 | 5.747279 | 0.744354 |
| 41 | 6 | -0.00011 | 5.074188 | -0.33038 | 41 | 6 | 0.178824 | 5.120138 | -0.89128 |
| 42 | 6 | -3.3326  | -1.69571 | 1.884854 | 42 | 6 | -3.37727 | -1.187   | 2.141591 |
| 43 | 6 | -2.56964 | -1.7376  | 3.22409  | 43 | 6 | -2.70989 | -0.98246 | 3.517185 |
| 44 | 6 | -3.37531 | -1.13366 | 4.37465  | 44 | 6 | -3.58566 | -0.18215 | 4.481432 |
| 45 | 6 | -2.20052 | -3.18606 | 3.559628 | 45 | 6 | -2.37902 | -2.34511 | 4.134647 |
| 46 | 6 | -4.73449 | 1.452371 | -3.01401 | 46 | 6 | -4.81983 | 1.30268  | -3.13156 |
| 47 | 6 | -3.3646  | -0.61423 | -3.42034 | 47 | 6 | -3.39483 | -0.75195 | -3.41861 |
| 48 | 6 | -7.57685 | 0.174934 | -1.30326 | 48 | 6 | -7.54083 | -2.06072 | -1.28199 |
| 49 | 6 | -7.32015 | -2.31337 | -1.48118 | 49 | 6 | -5.25354 | -3.0764  | -1.32794 |
| 50 | 8 | -6.31611 | -1.42296 | 0.980567 | 50 | 8 | -6.36093 | -1.09481 | 1.008014 |
| 51 | 8 | -6.05517 | -1.25567 | -3.6791  | 51 | 8 | -6.37824 | -1.03666 | -3.54851 |
| 52 | 6 | 1.704545 | -3.30781 | 0.738777 | 52 | 6 | 1.451871 | -3.17933 | 1.048967 |
| 53 | 6 | 2.259404 | -4.3587  | -0.2137  | 53 | 6 | 1.961305 | -4.34844 | 0.216587 |
| 54 | 6 | 1.442309 | -3.91795 | 2.115089 | 54 | 6 | 1.141546 | -3.63207 | 2.475042 |
| 55 | 8 | 3.581913 | -2.14421 | 1.697225 | 55 | 8 | 3.375597 | -2.02112 | 1.918081 |
| 56 | 1 | 1.960987 | -1.34691 | -0.99507 | 56 | 1 | 1.83126  | -1.42005 | -0.86835 |
| 57 | 1 | 6.564302 | 2.816951 | -1.86659 | 57 | 1 | 6.647976 | 2.396357 | -2.08624 |
| 58 | 1 | 5.082439 | 3.195042 | -0.98939 | 58 | 1 | 5.175139 | 2.936027 | -1.28126 |
| 59 | 1 | 5.022192 | 2.177854 | -2.43954 | 59 | 1 | 5.083855 | 1.774277 | -2.61665 |
| 60 | 1 | 6.791121 | 0.616607 | 1.209727 | 60 | 1 | 6.725536 | 0.527614 | 1.208808 |
| 61 | 1 | 7.683961 | 1.785079 | 0.237074 | 61 | 1 | 7.687526 | 1.54219  | 0.134659 |
| 62 | 1 | 6.252538 | 2.29949  | 1.133108 | 62 | 1 | 6.2717   | 2.216595 | 0.945193 |
| 63 | 1 | 7.721894 | -1.97367 | -2.89647 | 63 | 1 | 7.580193 | -2.52706 | -2.58253 |
| 64 | 1 | 6.212571 | -1.51964 | -3.69958 | 64 | 1 | 6.107396 | -2.08765 | -3.45828 |
| 65 | 1 | 6.337465 | -3.06827 | -2.85452 | 65 | 1 | 6.141728 | -3.54224 | -2.45282 |
| 66 | 1 | 7.841984 | -1.95264 | -0.30858 | 66 | 1 | 7.664561 | -2.2383  | -0.00998 |

|     |   |          |          |          |     |   |          |          |          |
|-----|---|----------|----------|----------|-----|---|----------|----------|----------|
| 67  | 1 | 6.382505 | -1.64441 | 0.63459  | 67  | 1 | 6.210024 | -1.75984 | 0.867449 |
| 68  | 1 | 6.504594 | -3.11896 | -0.3188  | 68  | 1 | 6.269597 | -3.33169 | 0.077501 |
| 69  | 1 | 0.440387 | -1.10817 | 1.566925 | 69  | 1 | 0.292701 | -0.84987 | 1.633143 |
| 70  | 1 | 0.062736 | 0.525346 | 1.857279 | 70  | 1 | 0.001235 | 0.821735 | 1.75378  |
| 71  | 1 | -0.38657 | -0.24278 | -0.99148 | 71  | 1 | -0.46261 | -0.18698 | -1.01372 |
| 72  | 1 | -1.26615 | -1.21711 | 0.106569 | 72  | 1 | -1.39565 | -1.02109 | 0.152664 |
| 73  | 1 | 0.567643 | 2.276597 | 2.875475 | 73  | 1 | 0.580705 | 2.642617 | 2.59596  |
| 74  | 1 | 0.800221 | 3.958973 | 2.560533 | 74  | 1 | 0.903578 | 4.270962 | 2.117997 |
| 75  | 1 | 2.647697 | 3.415549 | 1.531002 | 75  | 1 | 2.725961 | 3.536523 | 1.167249 |
| 76  | 1 | 1.704027 | 2.997062 | 0.150996 | 76  | 1 | 1.771592 | 3.022985 | -0.17268 |
| 77  | 1 | -3.05712 | 3.450029 | 0.052268 | 77  | 1 | -2.96093 | 3.703322 | -0.36071 |
| 78  | 1 | -2.08099 | 3.717128 | -1.39675 | 78  | 1 | -1.973   | 3.770258 | -1.82535 |
| 79  | 1 | -4.57819 | 0.033147 | 2.093777 | 79  | 1 | -4.64693 | 0.529365 | 1.980594 |
| 80  | 1 | -3.30633 | 1.744421 | 1.476843 | 80  | 1 | -3.33639 | 2.134856 | 1.203187 |
| 81  | 1 | -2.13389 | 0.775184 | 2.310434 | 81  | 1 | -2.16868 | 1.279305 | 2.161862 |
| 82  | 1 | 3.27207  | 1.687454 | 3.219828 | 82  | 1 | 3.250293 | 1.961318 | 3.035404 |
| 83  | 1 | 1.96173  | 0.497794 | 3.197968 | 83  | 1 | 1.881689 | 0.841819 | 3.11705  |
| 84  | 1 | 3.602115 | 0.06934  | 2.680353 | 84  | 1 | 3.502501 | 0.281899 | 2.668196 |
| 85  | 1 | -1.13097 | 5.91188  | 2.072826 | 85  | 1 | -0.91301 | 6.265245 | 1.400128 |
| 86  | 1 | -2.62501 | 4.973045 | 1.949649 | 86  | 1 | -2.45459 | 5.3987   | 1.363907 |
| 87  | 1 | -2.2623  | 6.20763  | 0.739805 | 87  | 1 | -2.02313 | 6.477619 | 0.033792 |
| 88  | 1 | 0.469561 | 4.384578 | -1.03776 | 88  | 1 | 0.613983 | 4.336091 | -1.51773 |
| 89  | 1 | -0.43012 | 5.889706 | -0.92296 | 89  | 1 | -0.20537 | 5.889763 | -1.57037 |
| 90  | 1 | 0.784351 | 5.500861 | 0.303259 | 90  | 1 | 0.982537 | 5.569804 | -0.29901 |
| 91  | 1 | -4.21493 | -2.34168 | 1.988926 | 91  | 1 | -4.25528 | -1.82969 | 2.293696 |
| 92  | 1 | -2.72851 | -2.18689 | 1.115481 | 92  | 1 | -2.70759 | -1.7823  | 1.513115 |
| 93  | 1 | -1.63074 | -1.18266 | 3.126842 | 93  | 1 | -1.76029 | -0.45249 | 3.38584  |
| 94  | 1 | -2.83463 | -1.23562 | 5.321844 | 94  | 1 | -3.11515 | -0.11541 | 5.468393 |
| 95  | 1 | -3.55733 | -0.06618 | 4.219169 | 95  | 1 | -3.7394  | 0.841368 | 4.126934 |
| 96  | 1 | -4.34454 | -1.63186 | 4.484282 | 96  | 1 | -4.56765 | -0.6507  | 4.606885 |
| 97  | 1 | -1.60089 | -3.23247 | 4.474877 | 97  | 1 | -1.84292 | -2.22289 | 5.081779 |
| 98  | 1 | -1.6125  | -3.6341  | 2.75227  | 98  | 1 | -1.743   | -2.93184 | 3.464402 |
| 99  | 1 | -3.0946  | -3.80109 | 3.70859  | 99  | 1 | -3.28752 | -2.92439 | 4.331952 |
| 100 | 1 | -3.82645 | 2.055622 | -3.13001 | 100 | 1 | -3.96032 | 1.979509 | -3.2     |
| 101 | 1 | -5.40072 | 1.993716 | -2.33431 | 101 | 1 | -5.5923  | 1.800071 | -2.53254 |
| 102 | 1 | -5.23049 | 1.413117 | -3.9909  | 102 | 1 | -5.22034 | 1.188661 | -4.14579 |
| 103 | 1 | -3.13834 | -1.63778 | -3.09745 | 103 | 1 | -3.05891 | -1.70125 | -2.9868  |
| 104 | 1 | -3.7207  | -0.67089 | -4.45587 | 104 | 1 | -3.81012 | -0.97701 | -4.40806 |
| 105 | 1 | -2.42335 | -0.05276 | -3.44006 | 105 | 1 | -2.50842 | -0.12584 | -3.57299 |
| 106 | 1 | -8.33107 | 0.004329 | -0.52608 | 106 | 1 | -7.8311  | -2.65549 | -0.40811 |
| 107 | 1 | -8.09888 | 0.294846 | -2.25929 | 107 | 1 | -7.84181 | -2.6237  | -2.1731  |
| 108 | 1 | -7.09219 | 1.128445 | -1.06844 | 108 | 1 | -8.12854 | -1.13514 | -1.26144 |
| 109 | 1 | -7.94485 | -2.34425 | -2.3814  | 109 | 1 | -5.45    | -3.62361 | -2.25694 |
| 110 | 1 | -6.61876 | -3.15466 | -1.53503 | 110 | 1 | -4.17159 | -2.91727 | -1.2656  |
| 111 | 1 | -7.98007 | -2.49036 | -0.62406 | 111 | 1 | -5.52877 | -3.72372 | -0.48712 |

|     |   |          |          |          |     |   |          |          |          |
|-----|---|----------|----------|----------|-----|---|----------|----------|----------|
| 112 | 1 | 0.750706 | -2.94397 | 0.343461 | 112 | 1 | 0.523307 | -2.80888 | 0.602876 |
| 113 | 1 | 1.643662 | -5.26425 | -0.20304 | 113 | 1 | 1.298624 | -5.21544 | 0.308378 |
| 114 | 1 | 2.267041 | -3.98359 | -1.24089 | 114 | 1 | 2.0003   | -4.08039 | -0.84291 |
| 115 | 1 | 3.285693 | -4.6374  | 0.048878 | 115 | 1 | 2.968462 | -4.65122 | 0.522885 |
| 116 | 1 | 2.35094  | -4.36088 | 2.537927 | 116 | 1 | 2.016796 | -4.08835 | 2.950819 |
| 117 | 1 | 0.682617 | -4.70401 | 2.05257  | 117 | 1 | 0.332331 | -4.36975 | 2.480257 |
| 118 | 1 | 1.087056 | -3.15812 | 2.819365 | 118 | 1 | 0.832668 | -2.78504 | 3.096778 |

**Table S12.** Key transitions and their related rotatory and oscillator strengths of dominant conformer of **2a**.

| HOMO is 196 |                            |                 |            |               |                                                                  |
|-------------|----------------------------|-----------------|------------|---------------|------------------------------------------------------------------|
| No.         | Energy (cm <sup>-1</sup> ) | Wavelength (nm) | R (length) | Osc. Strength | Major contribs                                                   |
| 1           | 32767.1                    | 305.2           | -5.5149    | 0.0005        | H-2->L+1 (88%)                                                   |
| 2           | 33072.0                    | 302.4           | -9.356     | 0.0007        | H-3->LUMO (83%)                                                  |
| 3           | 33387.3                    | 299.5           | -27.5631   | 0.0036        | H-4->L+4 (46%), H-1->L+4 (40%)                                   |
| 4           | 33827.7                    | 295.6           | -4.5696    | 0.0004        | H-5->L+2 (41%), H-2->L+2 (48%)                                   |
| 5           | 34201.9                    | 292.4           | -11.866    | 0.0017        | H-6->LUMO (16%), H-6->L+3 (21%), H-3->L+3 (54%)                  |
| 6           | 36502.2                    | 274.0           | 3.2147     | 0.0164        | HOMO->L+2 (87%)                                                  |
| 7           | 36941.8                    | 270.7           | 20.7058    | 0.0458        | H-1->LUMO (46%), H-1->L+3 (49%)                                  |
| 8           | 38025.0                    | 263.0           | 1.3608     | 0.0007        | HOMO->LUMO (98%)                                                 |
| 9           | 38200.8                    | 261.8           | -8.1891    | 0.0452        | H-4->LUMO (31%), H-1->LUMO (16%), H-1->L+3 (22%), H-1->L+4 (25%) |
| 10          | 38504.1                    | 259.7           | -14.2185   | 0.0211        | H-4->L+4 (38%), H-1->LUMO (11%), H-1->L+3 (14%), H-1->L+4 (29%)  |
| 11          | 38908.2                    | 257.0           | 56.9744    | 0.343         | HOMO->L+1 (79%)                                                  |
| 12          | 39601.8                    | 252.5           | 0.5128     | 0.0005        | H-1->L+1 (96%)                                                   |
| 13          | 40002.7                    | 250.0           | -3.4375    | 0.0037        | H-6->LUMO (74%), H-3->L+3 (17%)                                  |
| 14          | 40148.7                    | 249.1           | 15.6259    | 0.0594        | H-5->L+1 (72%)                                                   |
| 15          | 40251.9                    | 248.4           | -16.7462   | 0.0081        | H-5->L+2 (49%), H-2->L+2 (35%)                                   |
| 16          | 40356.8                    | 247.8           | -31.6455   | 0.1424        | H-6->L+3 (14%), H-4->LUMO (48%), H-1->LUMO (12%)                 |
| 17          | 40531.0                    | 246.7           | -25.2566   | 0.0126        | HOMO->L+3 (34%), HOMO->L+4 (61%)                                 |
| 18          | 40906.8                    | 244.5           | -0.3952    | 0.0005        | HOMO->L+3 (64%), HOMO->L+4 (35%)                                 |
| 19          | 41279.5                    | 242.3           | 7.9179     | 0.0154        | H-3->L+4 (76%)                                                   |
| 20          | 41419.0                    | 241.4           | -0.011     | 0             | H-2->LUMO (99%)                                                  |
| 21          | 41434.3                    | 241.3           | 0.0235     | 0             | H-1->L+2 (99%)                                                   |
| 22          | 42083.6                    | 237.6           | 38.8127    | 0.1125        | H-6->L+3 (44%), H-4->LUMO (12%), H-3->L+3 (19%)                  |
| 23          | 42661.1                    | 234.4           | 0.6174     | 0.0006        | H-3->L+1 (95%)                                                   |
| 24          | 43371.7                    | 230.6           | 3.6499     | 0.0026        | H-4->L+3 (89%)                                                   |
| 25          | 43663.6                    | 229.0           | 0.0299     | 0.0001        | H-4->L+1 (98%)                                                   |
| 26          | 43948.3                    | 227.5           | 0.0811     | 0             | H-2->L+3 (72%), H-2->L+4 (28%)                                   |
| 27          | 44248.4                    | 226.0           | 0.0108     | 0             | H-2->L+3 (28%), H-2->L+4 (72%)                                   |
| 28          | 44341.1                    | 225.5           | -0.0046    | 0             | H-3->L+2 (99%)                                                   |
| 29          | 44738.0                    | 223.5           | 0.0652     | 0.0001        | H-5->LUMO (99%)                                                  |
| 30          | 45561.5                    | 219.5           | -0.0129    | 0             | H-4->L+2 (99%)                                                   |
| 31          | 45987.3                    | 217.5           | -2.1296    | 0.0027        | H-6->L+1 (27%), H-6->L+4 (63%)                                   |

|    |         |       |          |        |                                                                      |
|----|---------|-------|----------|--------|----------------------------------------------------------------------|
| 32 | 46384.1 | 215.6 | 4.889    | 0.0009 | H-7->L+1 (12%), H-6->L+1 (60%), H-6->L+4 (23%)                       |
| 33 | 46602.7 | 214.6 | 8.1884   | 0.0075 | H-7->L+1 (78%), H-6->L+1 (12%)                                       |
| 34 | 46707.6 | 214.1 | 7.682    | 0.008  | HOMO->L+5 (72%), HOMO->L+7 (22%)                                     |
| 35 | 46944.7 | 213.0 | 1.0927   | 0.0013 | H-7->LUMO (98%)                                                      |
| 36 | 47311.7 | 211.4 | -0.0094  | 0      | H-5->L+3 (84%), H-5->L+4 (15%)                                       |
| 37 | 47369.7 | 211.1 | 2.6212   | 0.0016 | H-1->L+5 (74%), H-1->L+6 (18%)                                       |
| 38 | 47456.0 | 210.7 | -13.3396 | 0.0069 | H-9->L+1 (30%), H-8->L+1 (52%)                                       |
| 39 | 47629.5 | 210.0 | -0.1739  | 0.0003 | H-5->L+3 (15%), H-5->L+4 (84%)                                       |
| 40 | 48014.2 | 208.3 | -0.0346  | 0      | H-6->L+2 (99%)                                                       |
| 41 | 48409.4 | 206.6 | -2.7667  | 0.0032 | HOMO->L+6 (83%)                                                      |
| 42 | 48561.8 | 205.9 | -2.5738  | 0.0007 | H-10->LUMO (14%), H-8->LUMO (75%)                                    |
| 43 | 48623.1 | 205.7 | -7.1649  | 0.0022 | H-13->LUMO (10%), H-10->LUMO (37%), H-9->LUMO (17%), H-8->LUMO (24%) |
| 44 | 48851.4 | 204.7 | 0.3487   | 0.0005 | H-9->L+1 (44%), H-8->L+1 (43%)                                       |
| 45 | 49035.3 | 203.9 | 0.4173   | 0.0015 | H-7->L+2 (76%), HOMO->L+7 (11%)                                      |
| 46 | 49067.5 | 203.8 | 2.8282   | 0.0011 | H-7->L+2 (20%), HOMO->L+5 (10%), HOMO->L+7 (41%), HOMO->L+8 (17%)    |
| 47 | 49337.7 | 202.7 | 2.4634   | 0.0016 | H-1->L+5 (11%), H-1->L+6 (66%), H-1->L+7 (11%)                       |
| 48 | 49439.4 | 202.3 | 2.1844   | 0.0008 | HOMO->L+7 (13%), HOMO->L+8 (59%)                                     |
| 49 | 49608.7 | 201.6 | 0.8514   | 0.0009 | H-7->L+3 (50%), H-7->L+4 (49%)                                       |
| 50 | 49693.4 | 201.2 | -0.8909  | 0.0038 | H-2->L+5 (51%), H-2->L+7 (31%)                                       |

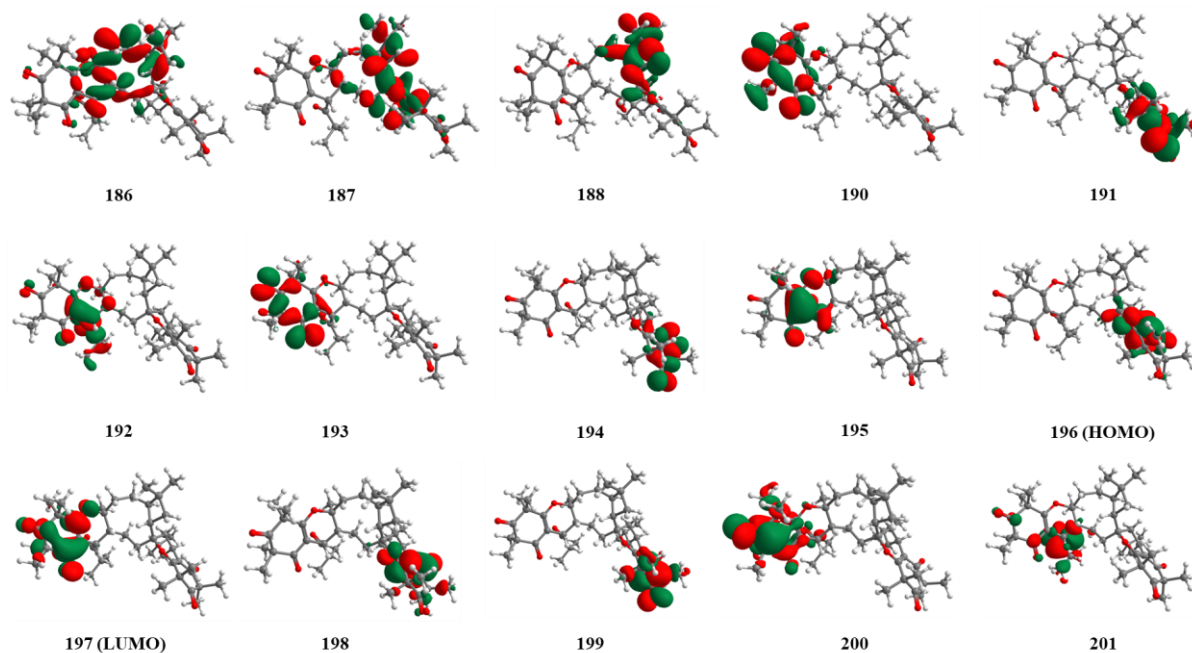

**Figure S7.** Key molecular orbitals involved in important transitions regarding the ECD spectrum of dominant conformer of **2a**.

**Table S13.** Key transitions and their related rotatory and oscillator strengths of dominant conformer of **2b**.

| HOMO is 196 |                            |                 |            |               |                |
|-------------|----------------------------|-----------------|------------|---------------|----------------|
| No.         | Energy (cm <sup>-1</sup> ) | Wavelength (nm) | R (length) | Osc. Strength | Major contribs |

|    |         |       |          |        |                                                                     |
|----|---------|-------|----------|--------|---------------------------------------------------------------------|
| 1  | 32633.2 | 306.4 | -10.2165 | 0.0007 | H-2->L+1 (86%)                                                      |
| 2  | 33061.5 | 302.5 | -9.681   | 0.0007 | H-3->LUMO (83%)                                                     |
| 3  | 33401.8 | 299.4 | -27.3125 | 0.0036 | H-4->L+4 (39%), H-1->L+4 (32%)                                      |
| 4  | 34173.7 | 292.6 | -22.6141 | 0.0065 | H-5->L+1 (24%), H-5->L+3 (16%), H-2->L+3 (40%)                      |
| 5  | 34214.8 | 292.3 | -11.0246 | 0.0018 | H-6->LUMO (17%), H-6->L+2 (20%), H-3->L+2 (54%)                     |
| 6  | 36218.3 | 276.1 | 27.8038  | 0.0511 | HOMO->L+1 (51%), HOMO->L+3 (34%)                                    |
| 7  | 36940.2 | 270.7 | 16.2467  | 0.0467 | H-1->LUMO (48%), H-1->L+2 (47%)                                     |
| 8  | 37898.4 | 263.9 | 0.3643   | 0.0002 | HOMO->LUMO (99%)                                                    |
| 9  | 38204.9 | 261.7 | -7.6733  | 0.042  | H-4->LUMO (31%), H-1->LUMO (15%), H-1->L+2 (23%),<br>H-1->L+4 (21%) |
| 10 | 38496.0 | 259.8 | -14.2291 | 0.021  | H-4->L+4 (30%), H-1->LUMO (11%), H-1->L+2 (15%), H-<br>1->L+4 (22%) |
| 11 | 38790.4 | 257.8 | -6.983   | 0.254  | HOMO->L+1 (36%), HOMO->L+3 (46%)                                    |
| 12 | 39292.1 | 254.5 | 0.0962   | 0.0002 | H-1->L+1 (96%)                                                      |
| 13 | 39969.6 | 250.2 | -2.6361  | 0.0072 | H-5->L+1 (60%), H-2->L+3 (31%)                                      |
| 14 | 39993.0 | 250.0 | -2.0772  | 0.003  | H-6->LUMO (74%), H-3->L+2 (17%)                                     |
| 15 | 40332.6 | 247.9 | -7.2771  | 0.1303 | H-6->L+2 (12%), H-4->LUMO (44%), H-1->LUMO (11%)                    |
| 16 | 40386.6 | 247.6 | -25.6266 | 0.022  | HOMO->L+2 (26%), HOMO->L+4 (56%)                                    |
| 17 | 40818.9 | 245.0 | 0.1588   | 0.0001 | HOMO->L+2 (70%), HOMO->L+4 (24%)                                    |
| 18 | 41279.5 | 242.3 | 7.9359   | 0.0156 | H-3->L+3 (15%), H-3->L+4 (62%)                                      |
| 19 | 41410.9 | 241.5 | -0.0338  | 0      | H-2->LUMO (99%)                                                     |
| 20 | 41998.1 | 238.1 | 45.892   | 0.0815 | H-5->L+3 (44%), H-5->L+4 (10%)                                      |
| 21 | 42090.0 | 237.6 | -27.2301 | 0.0148 | H-1->L+3 (72%), H-1->L+4 (15%)                                      |
| 22 | 42124.7 | 237.4 | 59.3056  | 0.1019 | H-6->L+2 (43%), H-4->LUMO (11%), H-3->L+2 (18%)                     |
| 23 | 42326.4 | 236.3 | 4.4767   | 0.0036 | H-3->L+1 (91%)                                                      |
| 24 | 43337.0 | 230.7 | 0.0773   | 0.0002 | H-4->L+1 (98%)                                                      |
| 25 | 43395.0 | 230.4 | 3.7683   | 0.0027 | H-4->L+2 (89%)                                                      |
| 26 | 43965.3 | 227.5 | 0.1284   | 0      | H-2->L+2 (65%), H-2->L+4 (29%)                                      |
| 27 | 44264.5 | 225.9 | 0.012    | 0      | H-2->L+2 (34%), H-2->L+3 (12%), H-2->L+4 (53%)                      |
| 28 | 44974.3 | 222.3 | 0.0946   | 0.0001 | H-5->LUMO (99%)                                                     |
| 29 | 45012.2 | 222.2 | -0.017   | 0      | H-3->L+3 (81%), H-3->L+4 (19%)                                      |
| 30 | 45854.2 | 218.1 | -1.0811  | 0.0014 | H-6->L+1 (68%), H-6->L+4 (20%)                                      |
| 31 | 46178.5 | 216.6 | 1.6847   | 0.0011 | H-6->L+1 (16%), H-6->L+4 (32%), H-4->L+3 (32%)                      |
| 32 | 46197.0 | 216.5 | 1.3638   | 0.0004 | H-6->L+4 (16%), H-4->L+3 (50%), H-4->L+4 (14%)                      |
| 33 | 46355.1 | 215.7 | 5.9956   | 0.0048 | H-7->L+1 (80%)                                                      |
| 34 | 46488.2 | 215.1 | 8.3964   | 0.01   | HOMO->L+5 (75%), HOMO->L+7 (15%)                                    |
| 35 | 46922.9 | 213.1 | 1.4345   | 0.0012 | H-7->LUMO (98%)                                                     |
| 36 | 47325.4 | 211.3 | 1.9446   | 0.0027 | H-1->L+5 (66%), H-1->L+6 (13%)                                      |
| 37 | 47327.8 | 211.3 | -12.193  | 0.0063 | H-9->L+1 (25%), H-8->L+1 (48%)                                      |
| 38 | 47578.6 | 210.2 | -0.1398  | 0.0001 | H-5->L+2 (78%), H-5->L+4 (18%)                                      |
| 39 | 47876.3 | 208.9 | 0.0225   | 0.0002 | H-5->L+2 (21%), H-5->L+3 (14%), H-5->L+4 (64%)                      |
| 40 | 48219.9 | 207.4 | -3.5072  | 0.0049 | HOMO->L+6 (83%)                                                     |
| 41 | 48534.4 | 206.0 | -0.7644  | 0.0002 | H-8->LUMO (94%)                                                     |
| 42 | 48615.1 | 205.7 | -10.2508 | 0.0028 | H-13->LUMO (11%), H-10->LUMO (48%), H-9->LUMO<br>(19%)              |

|    |         |       |         |        |                                                |
|----|---------|-------|---------|--------|------------------------------------------------|
| 43 | 48665.9 | 205.5 | -1.9611 | 0.001  | H-9->L+1 (40%), H-8->L+1 (36%)                 |
| 44 | 48693.3 | 205.4 | -0.0513 | 0.0002 | H-6->L+3 (72%), H-6->L+4 (18%)                 |
| 45 | 48964.3 | 204.2 | 0.8815  | 0.0007 | HOMO->L+8 (75%)                                |
| 46 | 49214.3 | 203.2 | 0.2124  | 0.0005 | HOMO->L+5 (13%), HOMO->L+7 (70%)               |
| 47 | 49330.5 | 202.7 | 3.2656  | 0.0017 | H-1->L+5 (10%), H-1->L+6 (68%), H-1->L+8 (14%) |
| 48 | 49524.9 | 201.9 | 0.8388  | 0.0033 | H-2->L+5 (57%), H-2->L+7 (25%)                 |
| 49 | 49561.2 | 201.8 | -0.9003 | 0.0006 | H-7->L+2 (19%), H-7->L+3 (72%)                 |
| 50 | 49653.1 | 201.4 | 2.4169  | 0.0009 | H-7->L+2 (29%), H-7->L+3 (19%), H-7->L+4 (48%) |

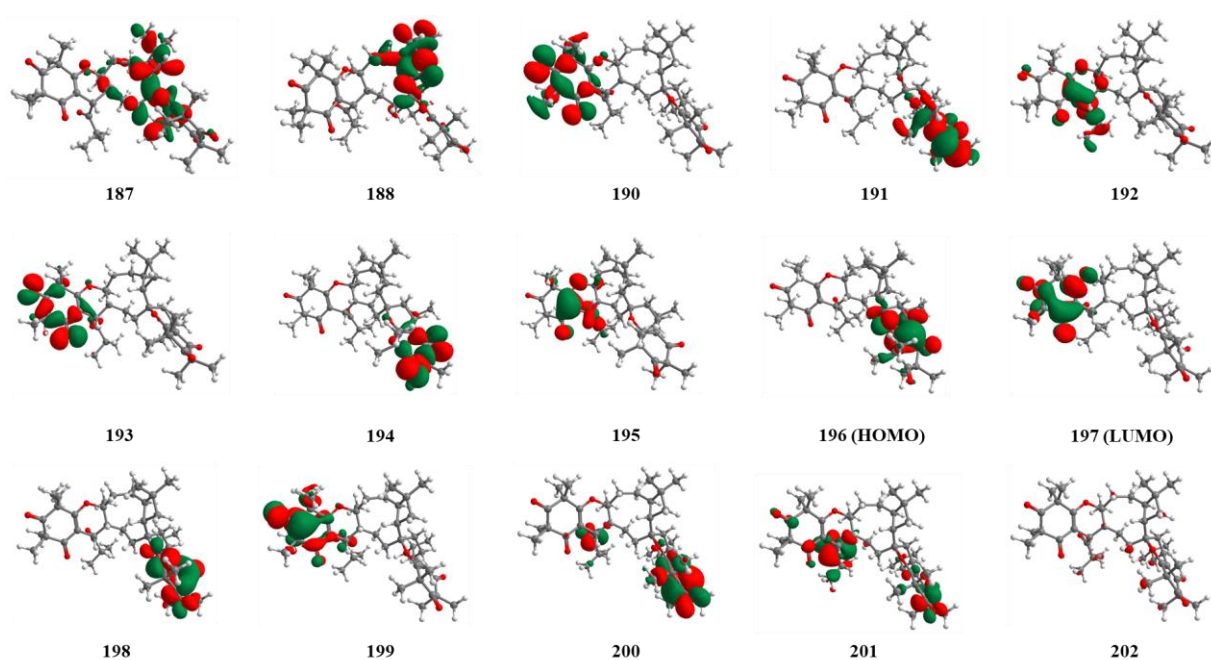

**Figure S8.** Key molecular orbitals involved in important transitions regarding the ECD spectrum of dominant conformer of **2b**.

#### 4. HRMS, UV, IR, and NMR spectra of the natural 1–2, 7, and 12–15

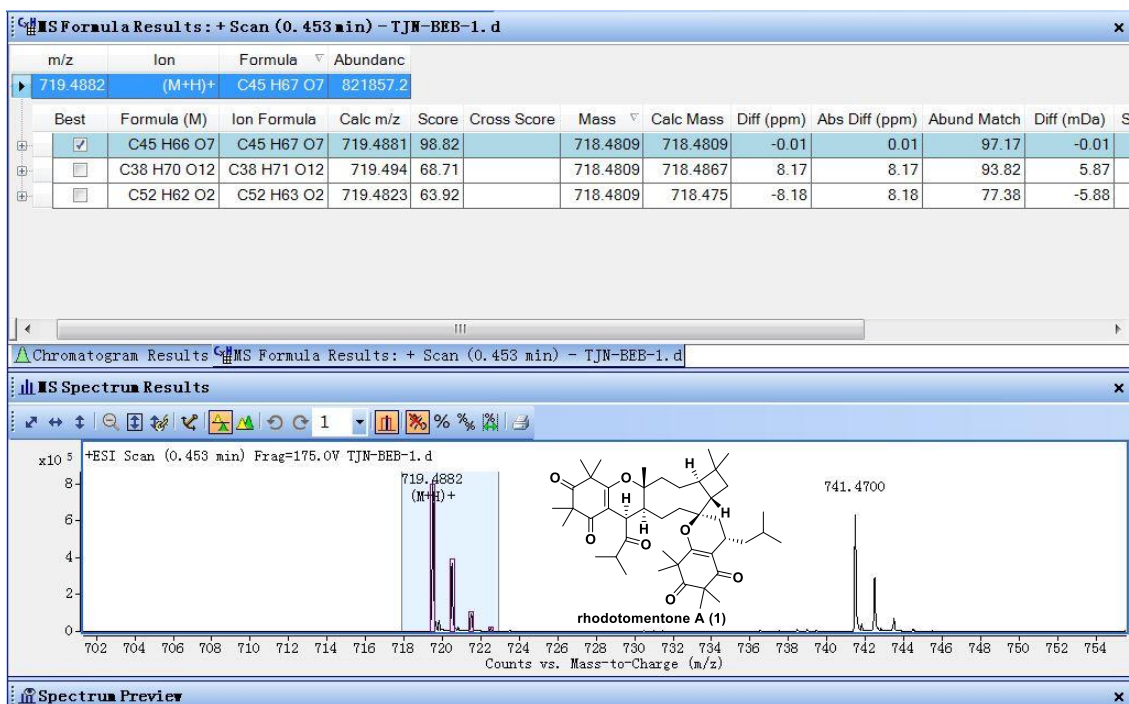

Figure S9. HR-ESI-MS spectrum of rhodotomentone A (1).

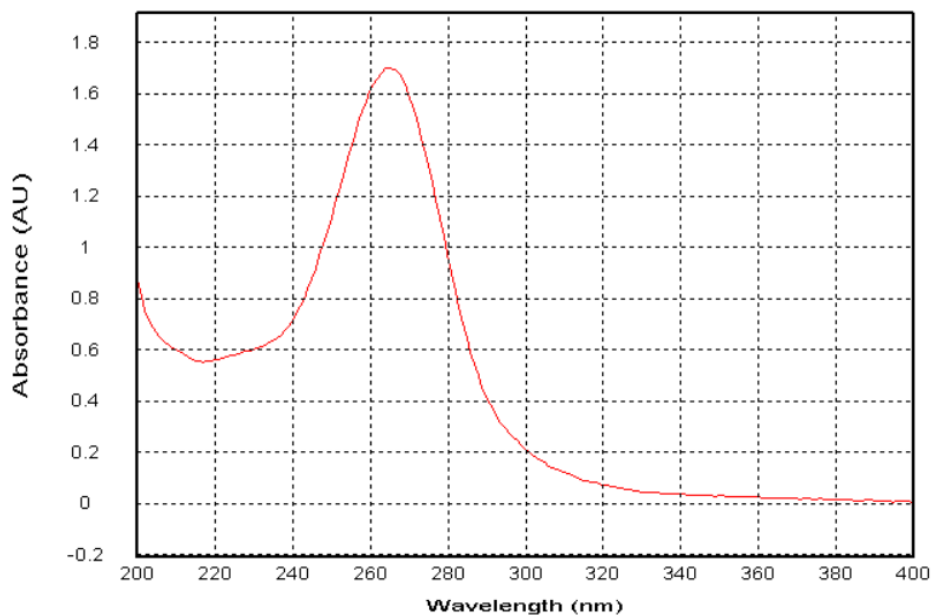

Figure S10. UV spectrum of rhodotomentone A (1) in MeOH.



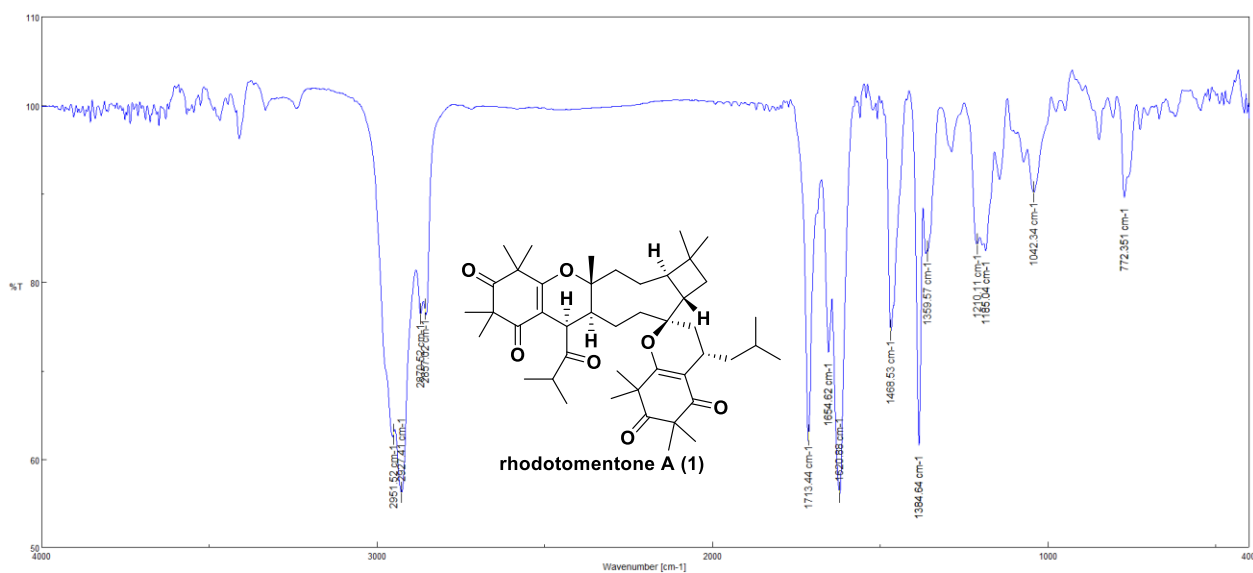

Figure S11. IR spectrum of rhodotomentone A (1) (KBr disc).

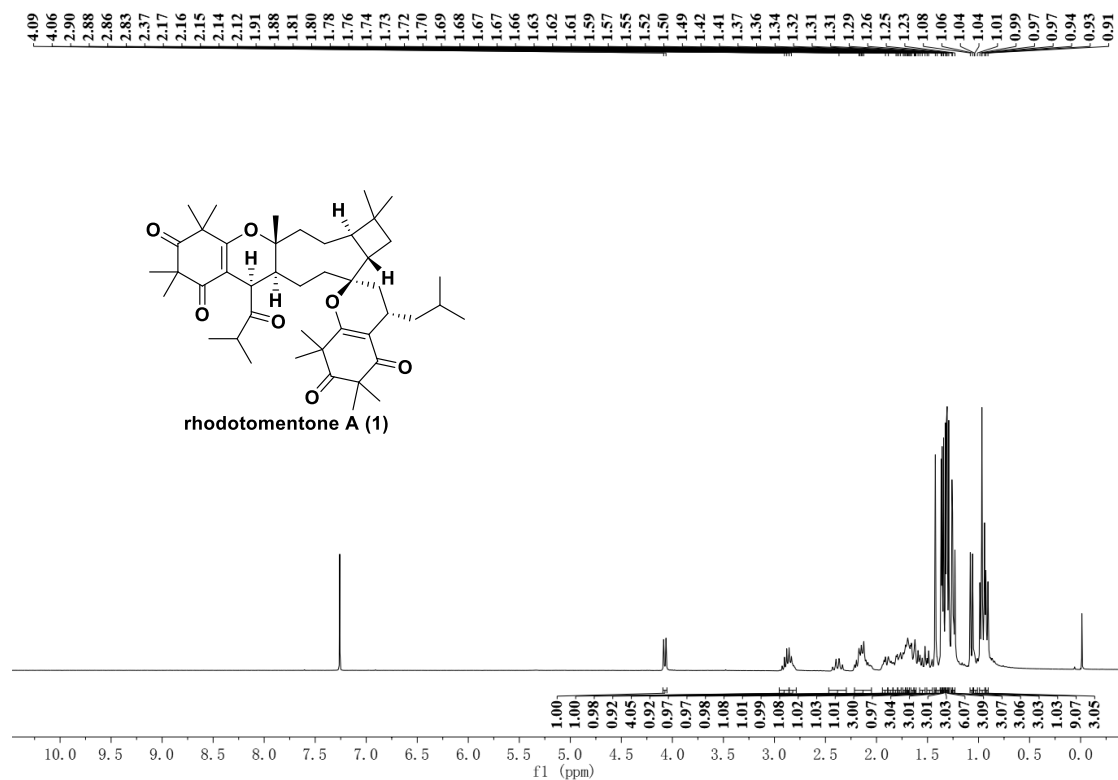

Figure S12. <sup>1</sup>H NMR spectrum (300 MHz) of rhodotomentone A (1) in CDCl<sub>3</sub>.

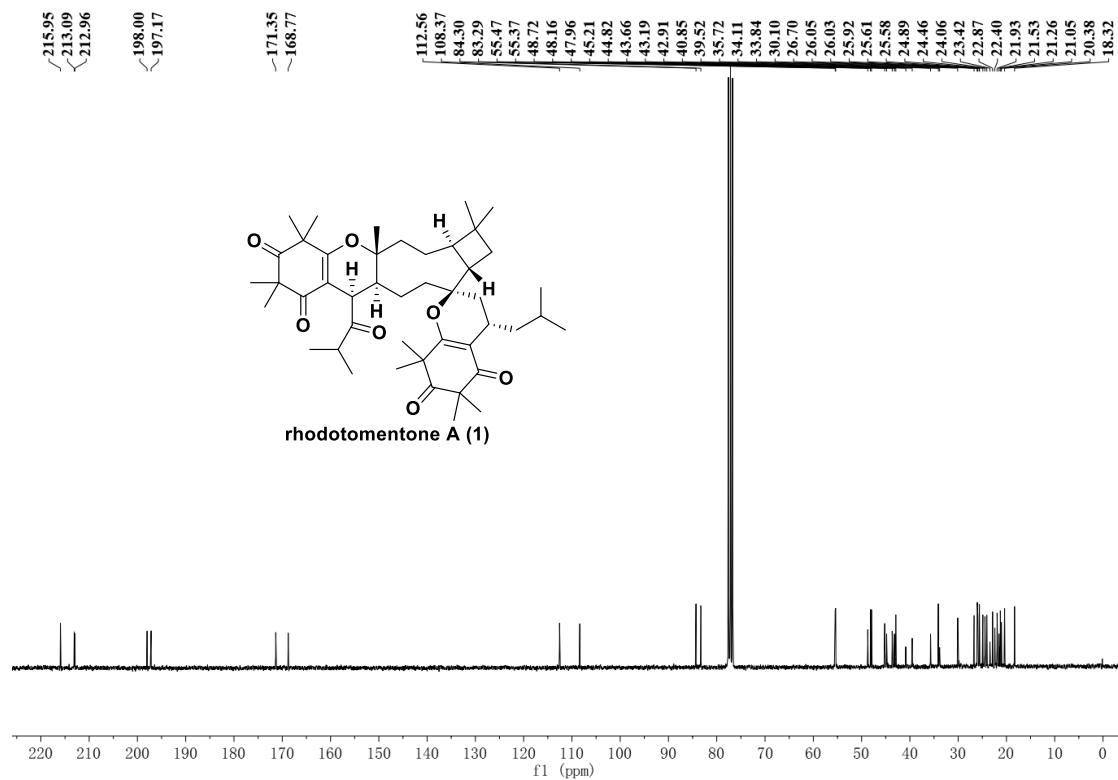

Figure S13.  $^{13}\text{C}$  NMR spectrum (75 MHz) of rhodotomentone A (1) in  $\text{CDCl}_3$ .

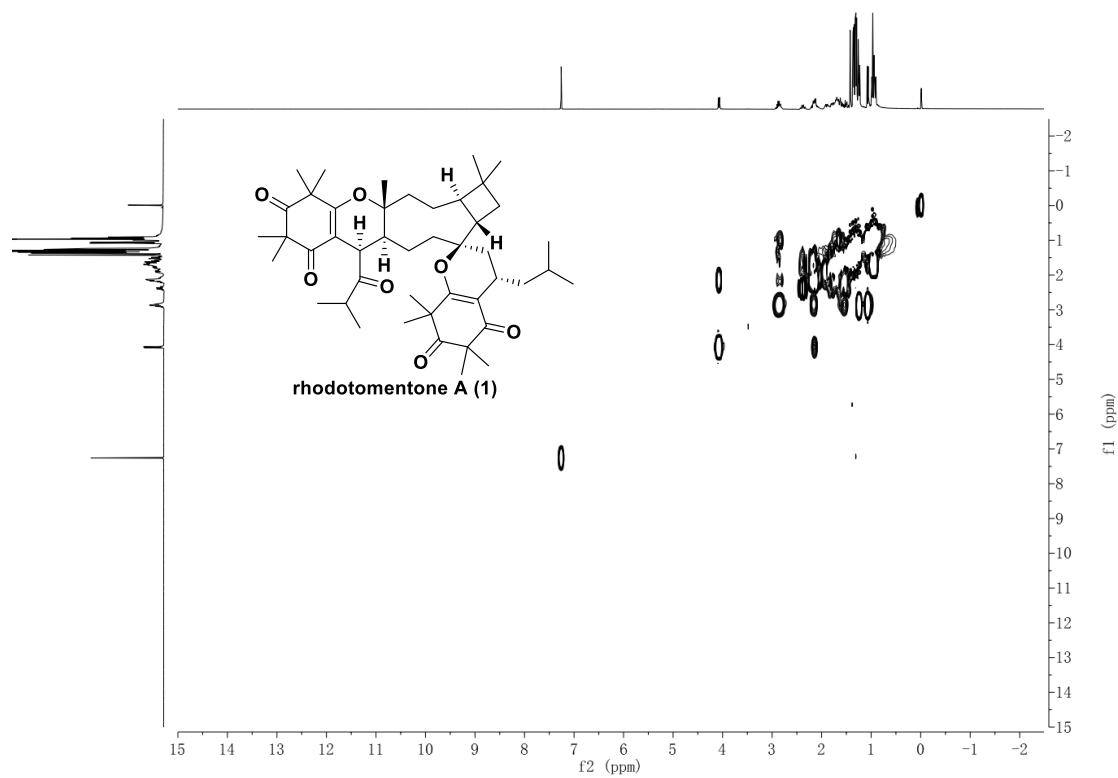

Figure S14.  $^1\text{H}$ - $^1\text{H}$  COSY spectrum of rhodotomentone A (1) in  $\text{CDCl}_3$ .

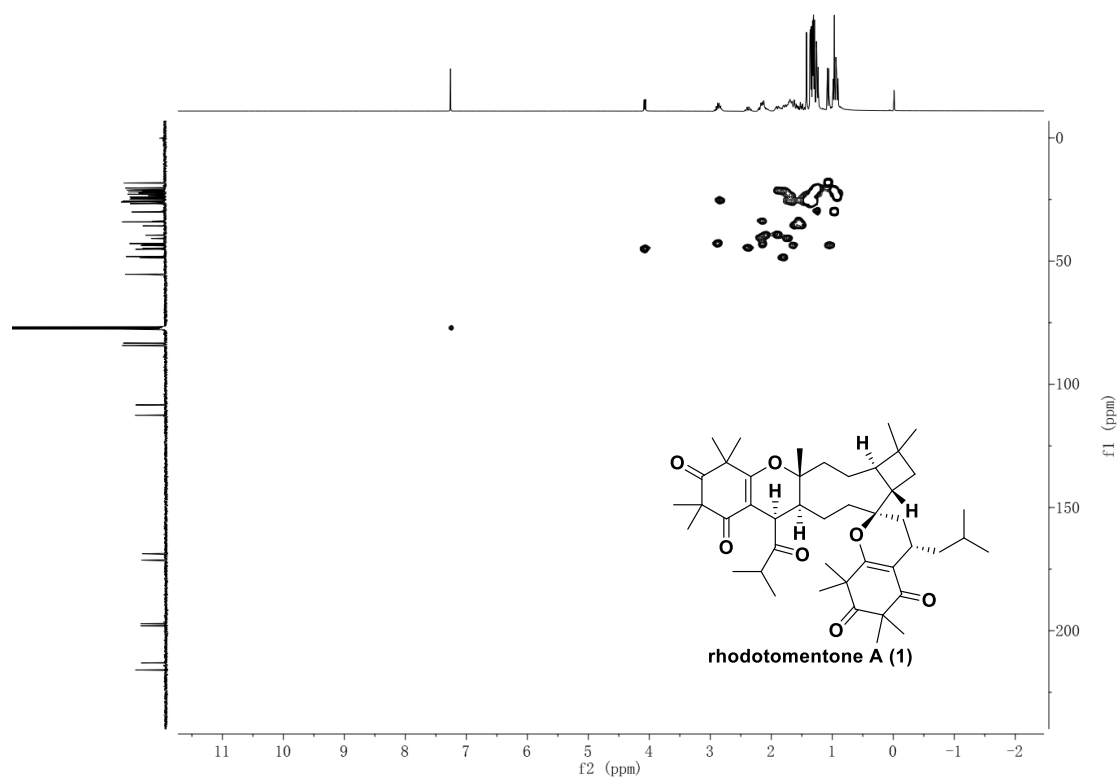

**Figure S15.** HSQC spectrum of rhodotomentone A (**1**) in  $\text{CDCl}_3$ .

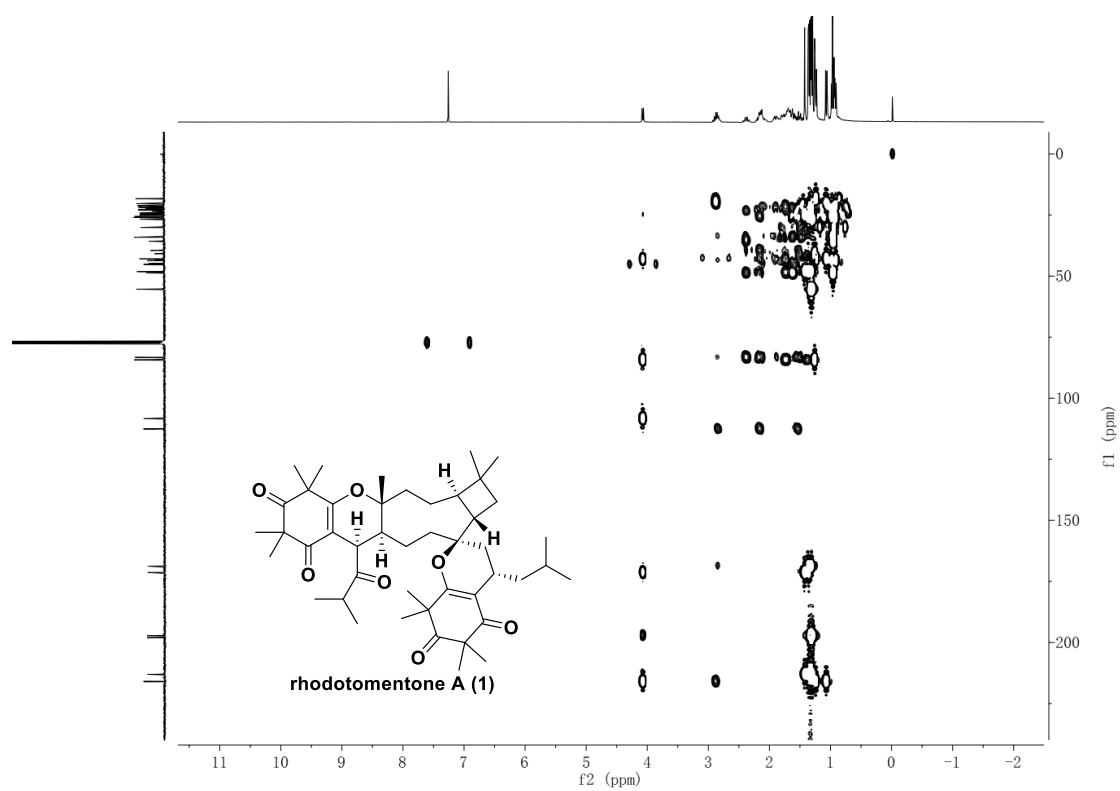

**Figure S16.** HMBC spectrum of rhodotomentone A (**1**) in  $\text{CDCl}_3$ .

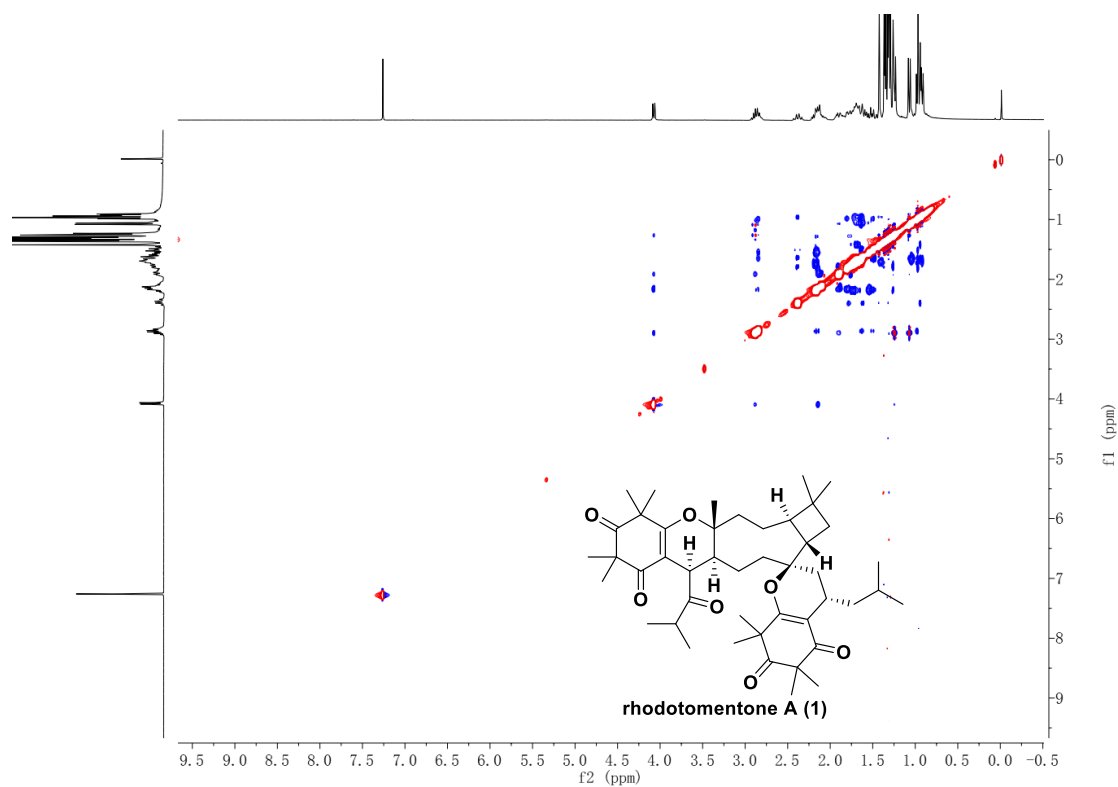

**Figure S17.** NOESY spectrum of rhodotomentone A (1) in CDCl<sub>3</sub>.

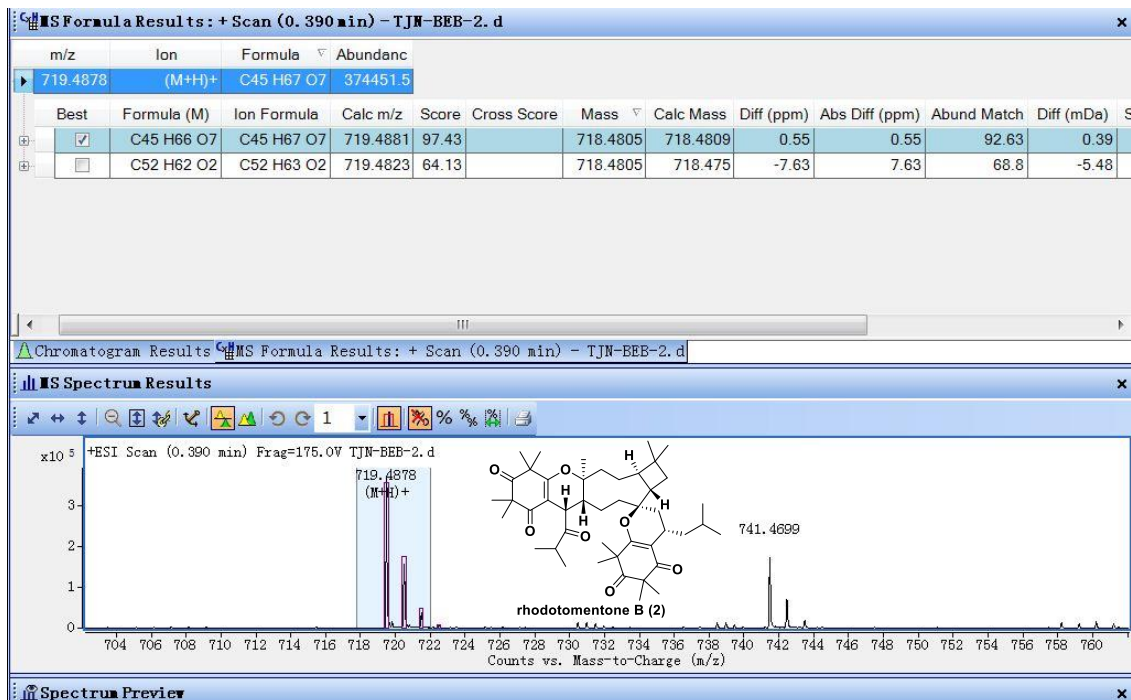

**Figure S18.** HR-ESI-MS spectrum of rhodotomentone B (2).

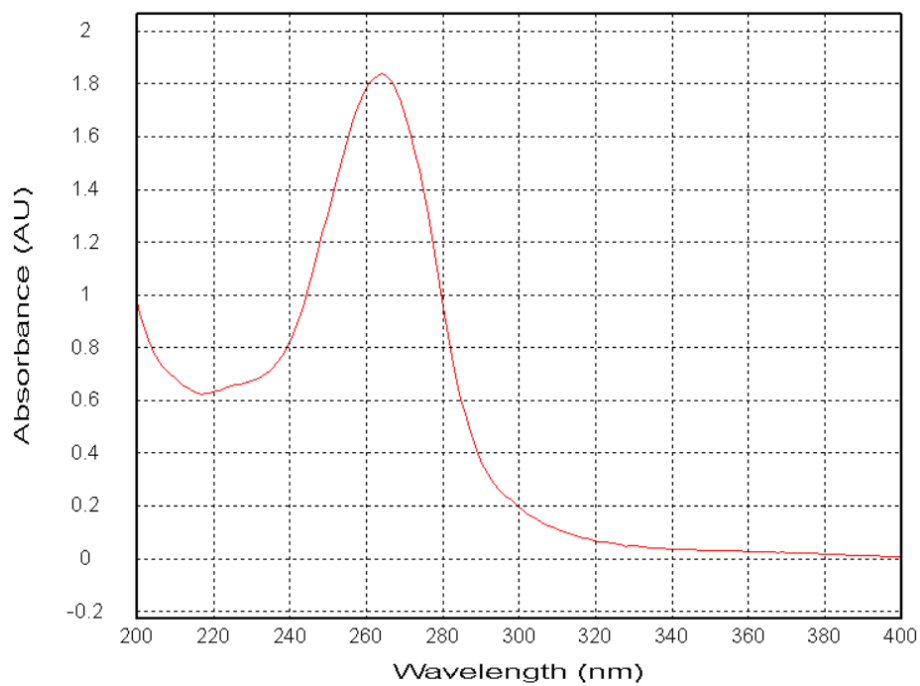

**Figure S19.** UV spectrum of rhodotomentone B (**2**) in MeOH.

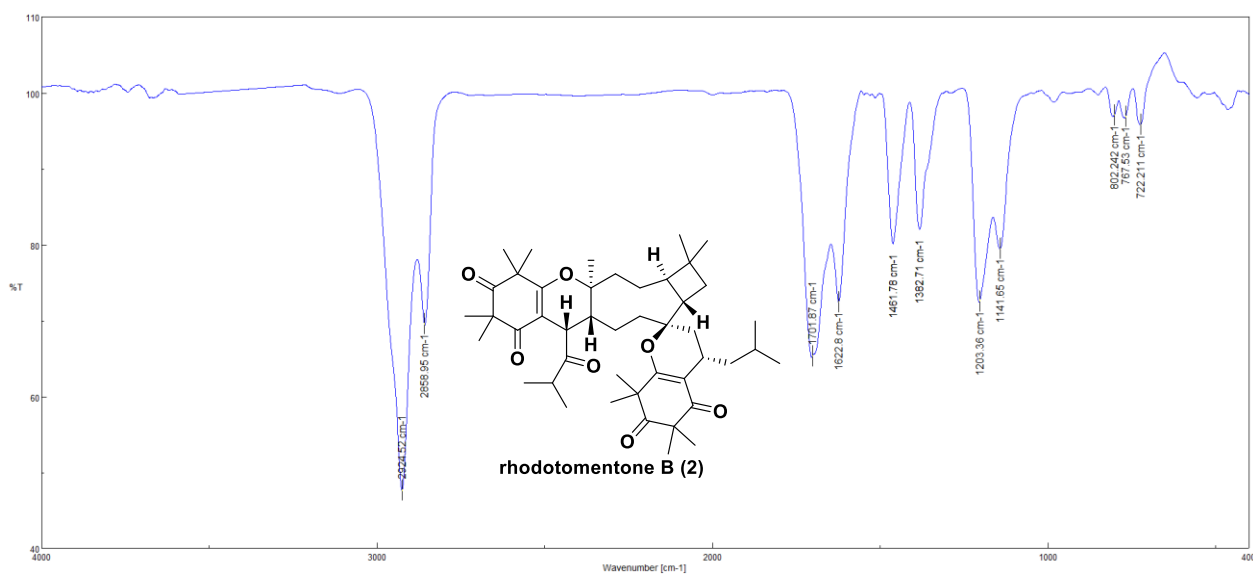

**Figure S20.** IR spectrum of rhodotomentone B (**2**) (KBr disc).

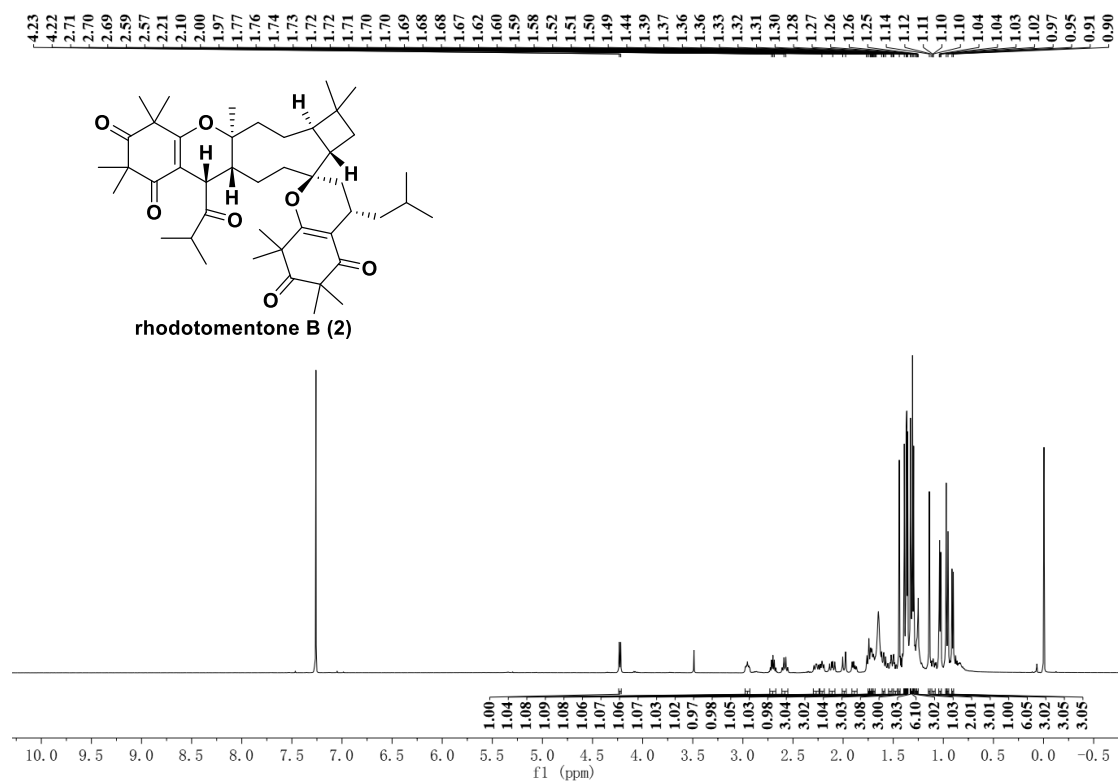

**Figure S21.**  $^1\text{H}$  NMR spectrum (500 MHz) of rhodotomentone B (2) in  $\text{CDCl}_3$ .

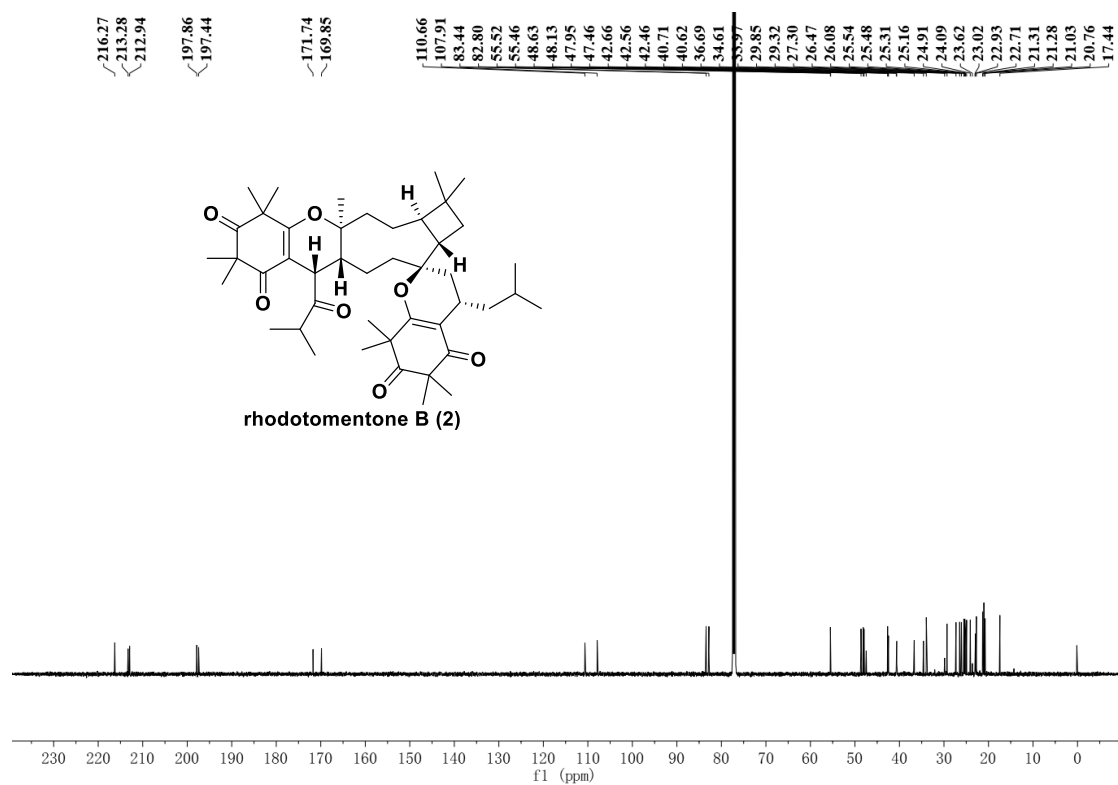

**Figure S22.**  $^{13}\text{C}$  NMR spectrum (125 MHz) of rhodotomentone B (2) in  $\text{CDCl}_3$ .

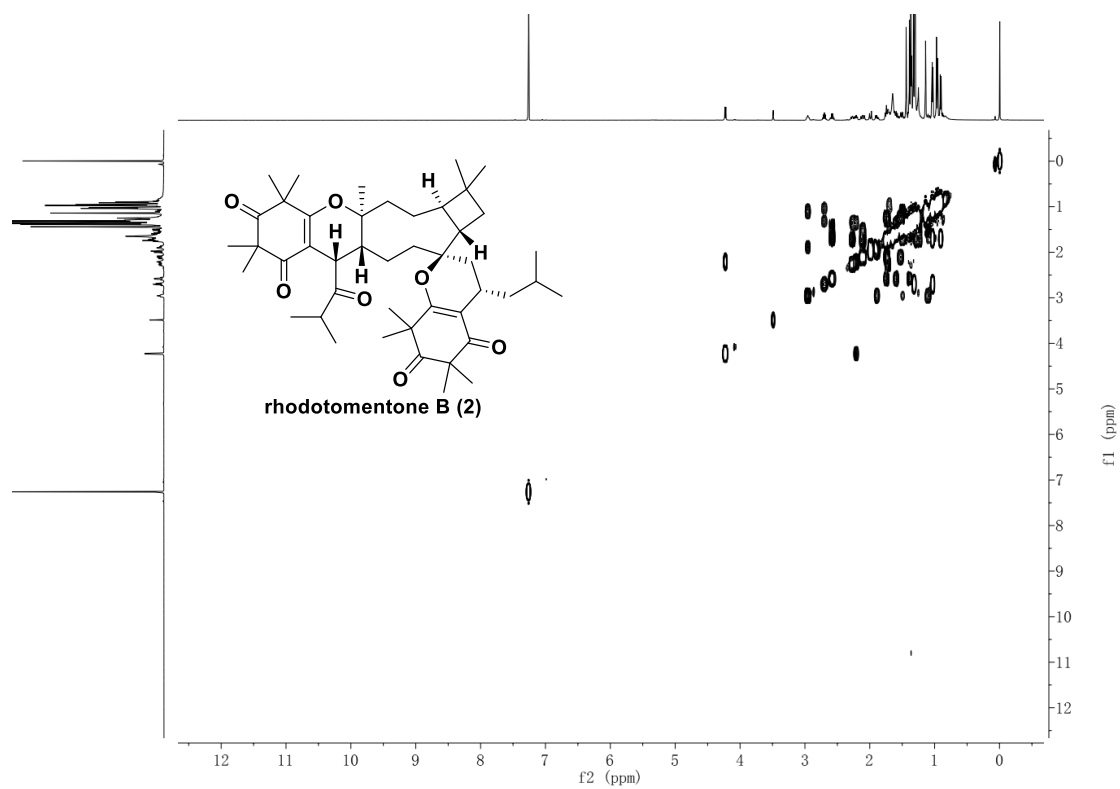

**Figure S23.**  $^1\text{H}$ - $^1\text{H}$  COSY spectrum of rhodotomentone B (2) in  $\text{CDCl}_3$ .

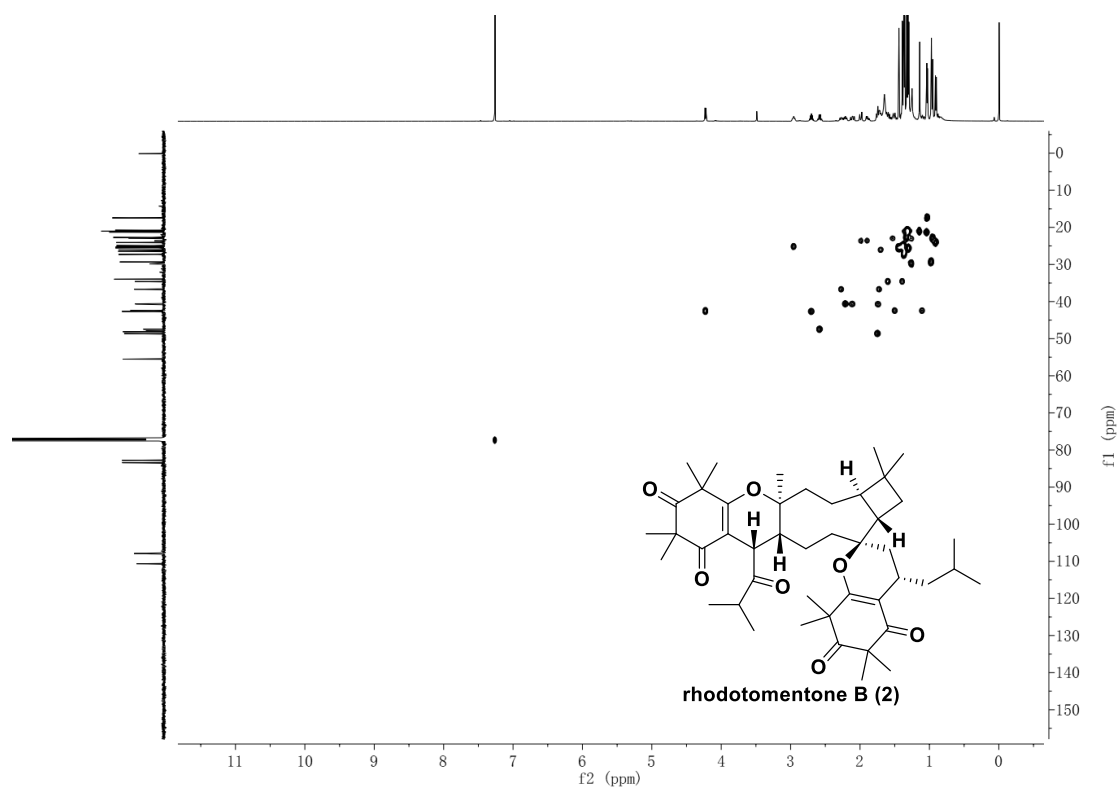

**Figure S24.** HSQC spectrum of rhodotomentone B (2) in  $\text{CDCl}_3$ .

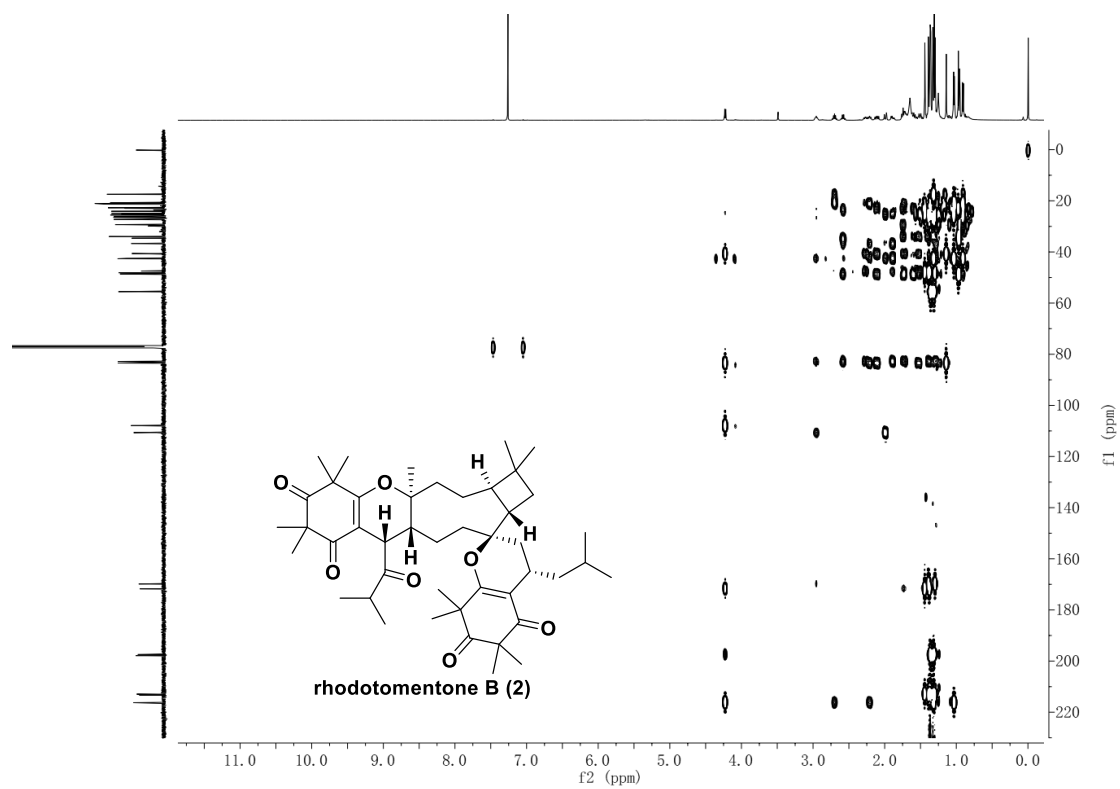

**Figure S25.** HMBC spectrum of rhodotomentone B (2) in  $\text{CDCl}_3$ .

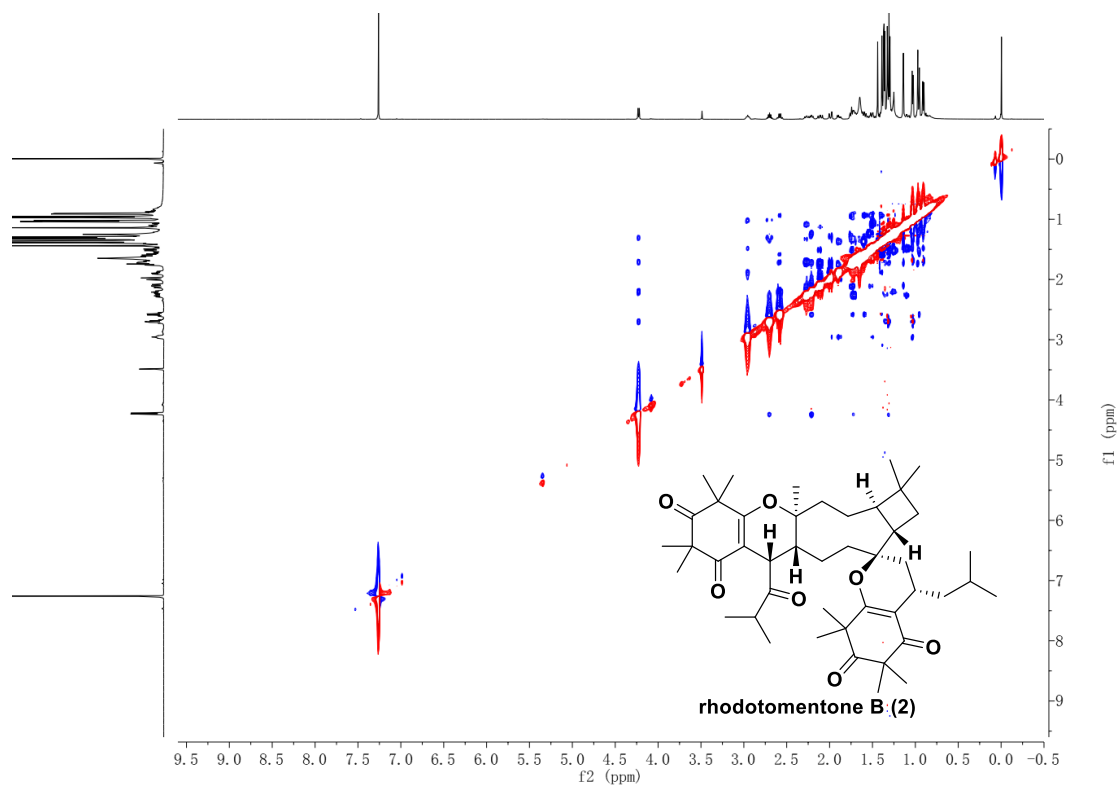

**Figure S26.** NOESY spectrum of rhodotomentone B (2) in  $\text{CDCl}_3$ .



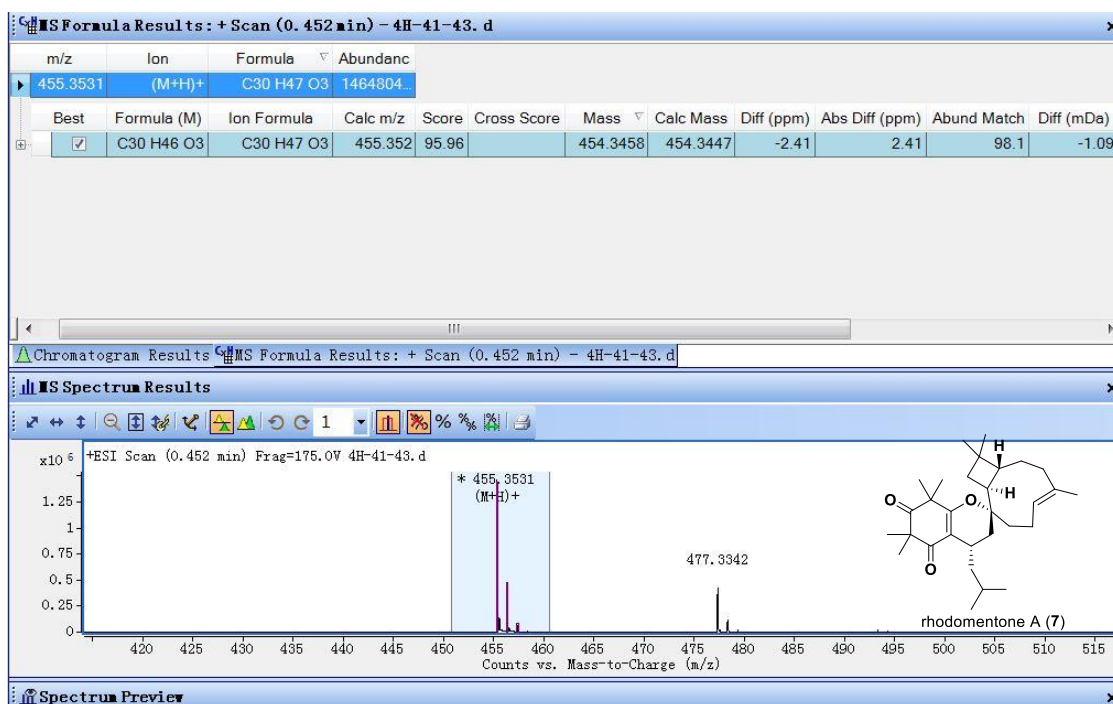

Figure S27. HR-ESI-MS spectrum of rhodomentone A (7).

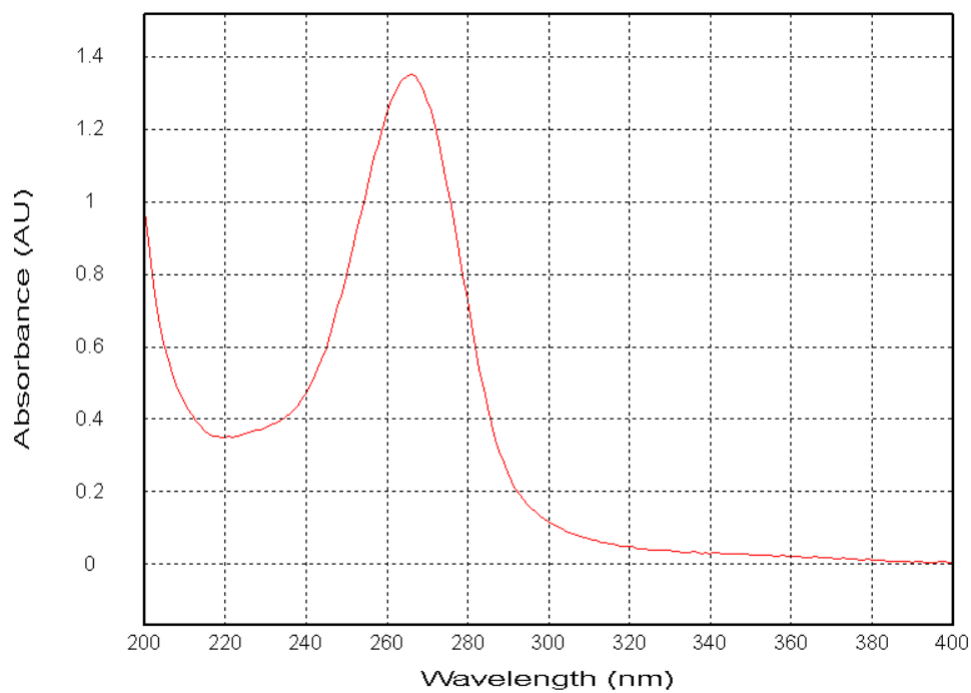

Figure S28. UV spectrum of rhodomentone A (7) in MeOH.

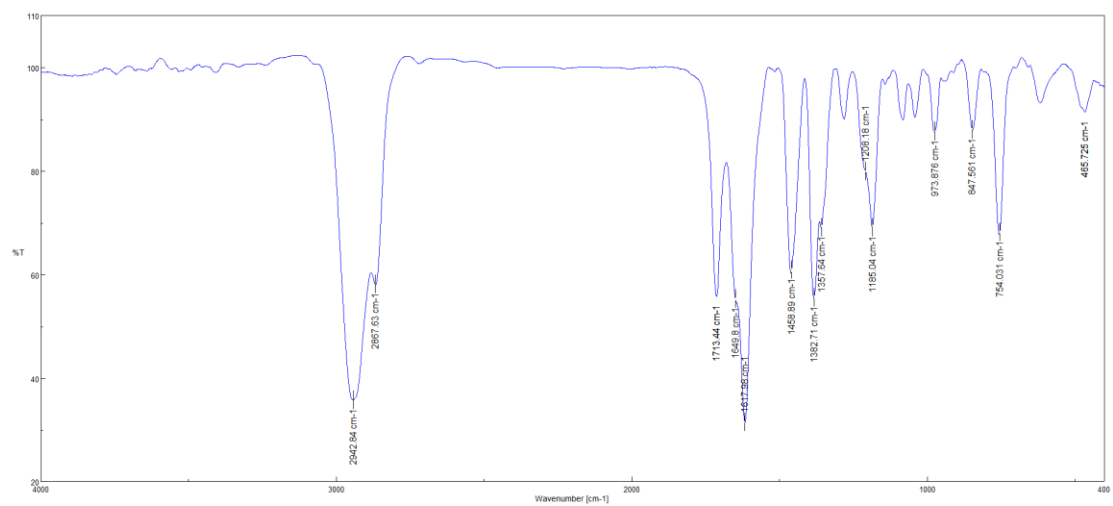

**Figure S29.** IR spectrum of rhodomentone A (**7**) (KBr disc).

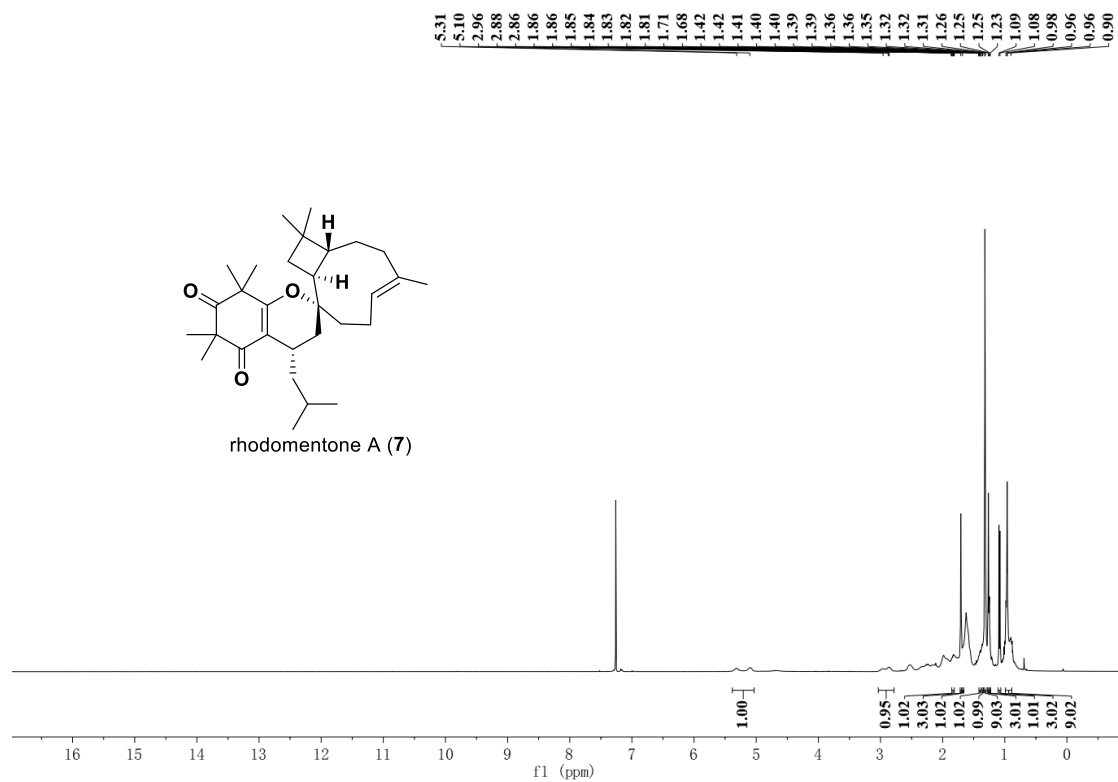

**Figure S30.**  $^1\text{H}$  NMR spectrum (400 MHz) of rhodomentone A (**7**) in  $\text{CDCl}_3$ .

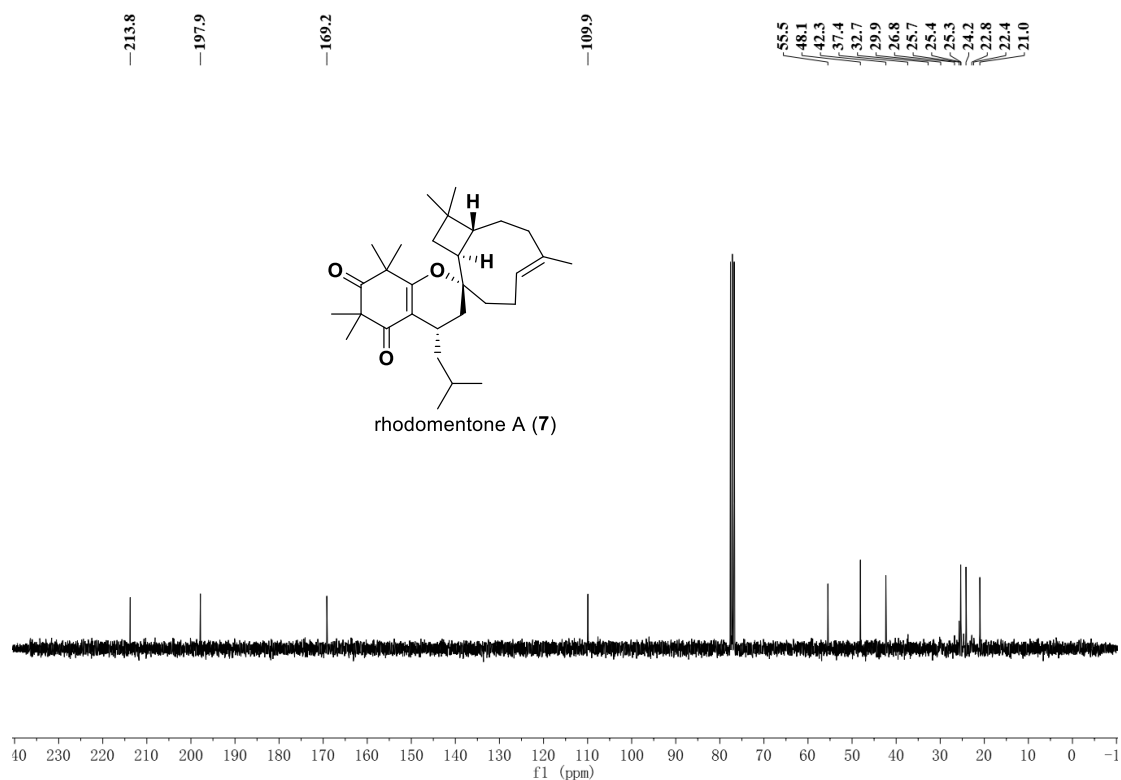

Figure S31. <sup>13</sup>C NMR spectrum (100 MHz) of rhodomentone A (7) in CDCl<sub>3</sub>.

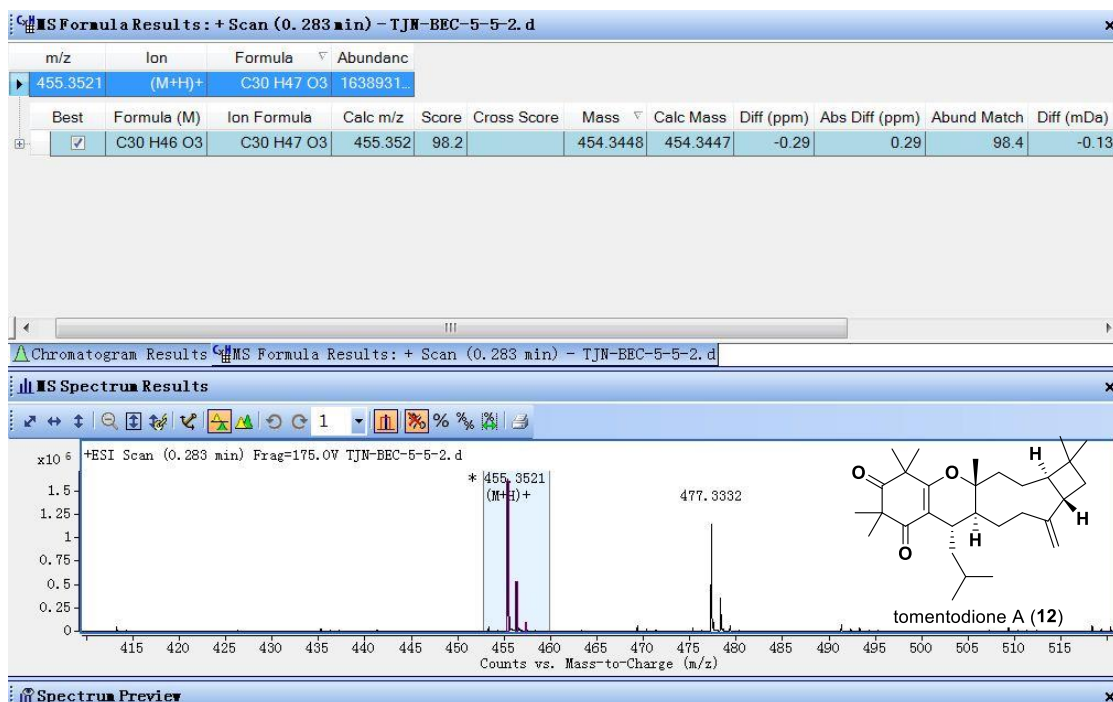

Figure S32. HR-ESI-MS spectrum of tomentodione A (12).

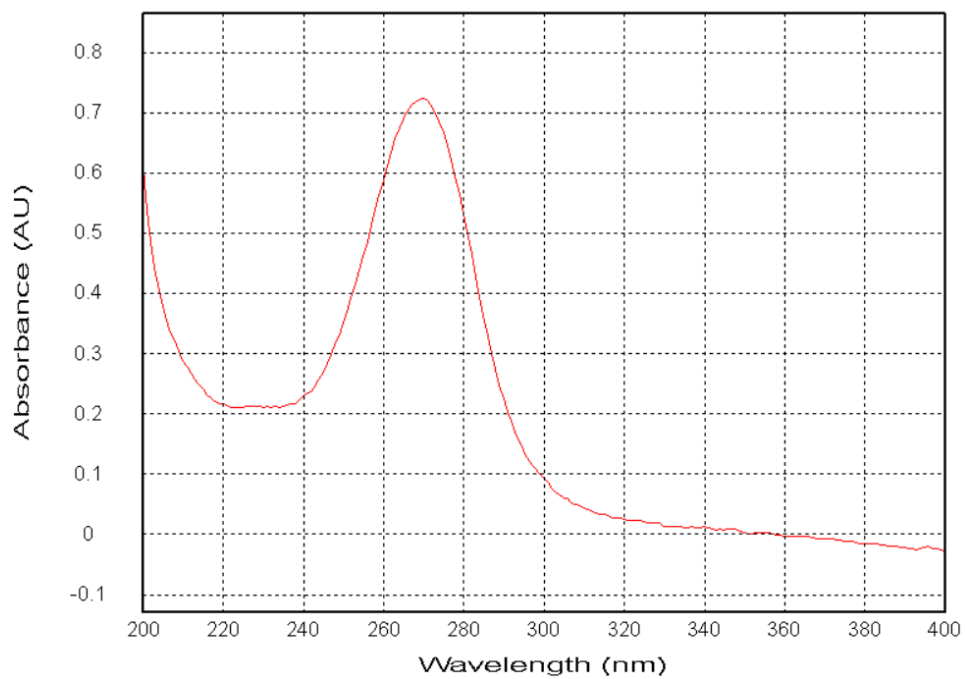

**Figure S33.** UV spectrum of tomentodione A (**12**) in MeOH.

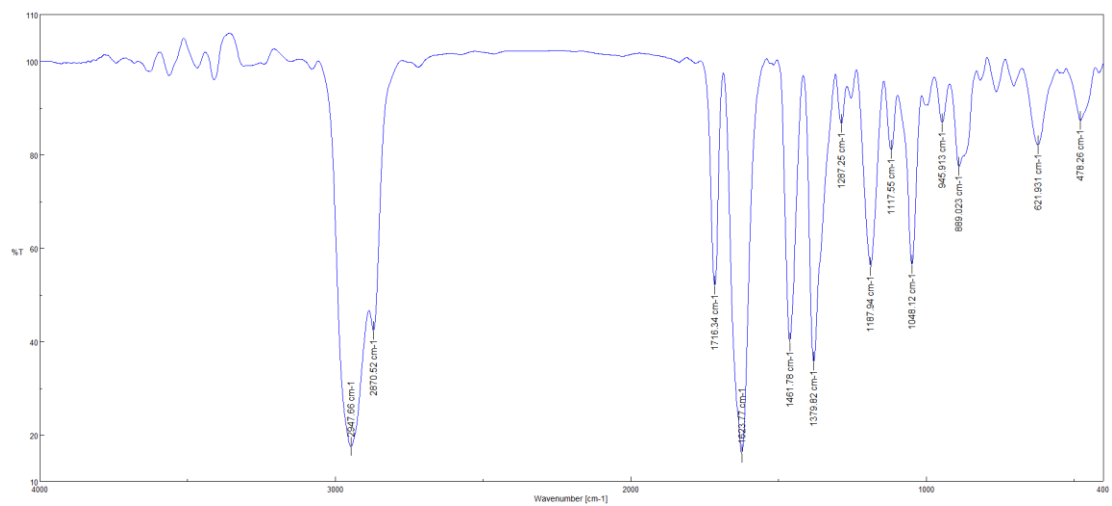

**Figure S34.** IR spectrum of tomentodione A (**12**) (KBr disc).

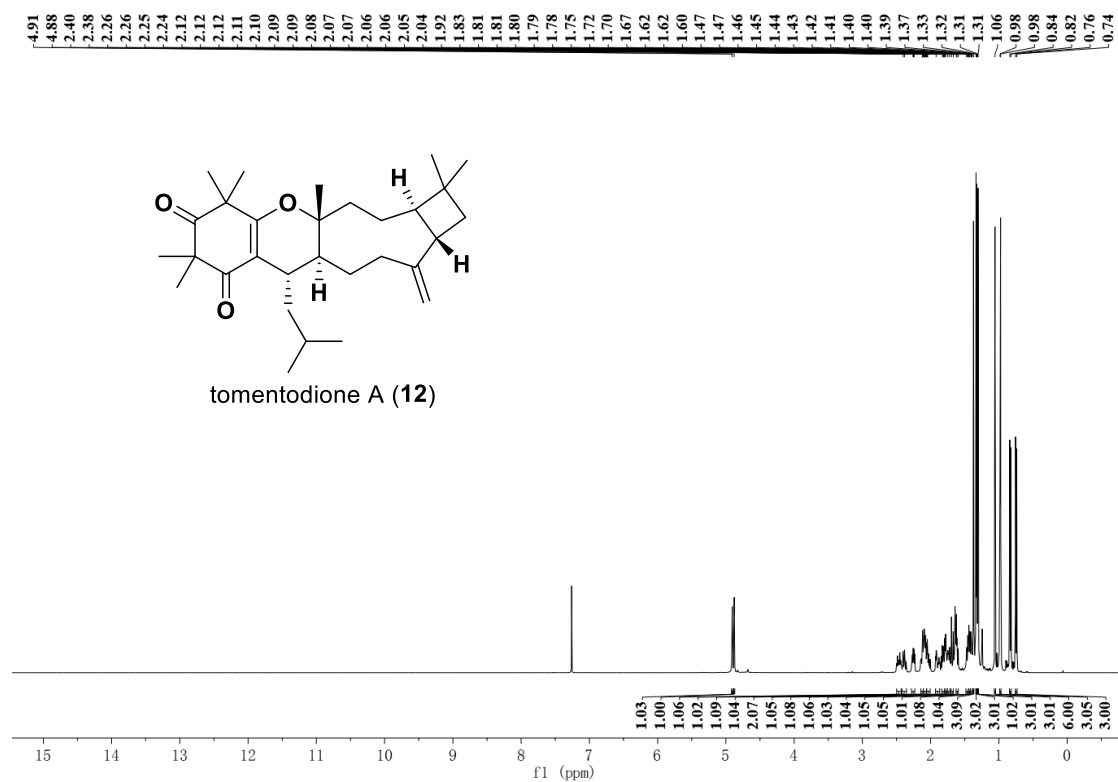

**Figure S35.**  $^1\text{H}$  NMR spectrum (400 MHz) of tomentodione A (12) in  $\text{CDCl}_3$ .

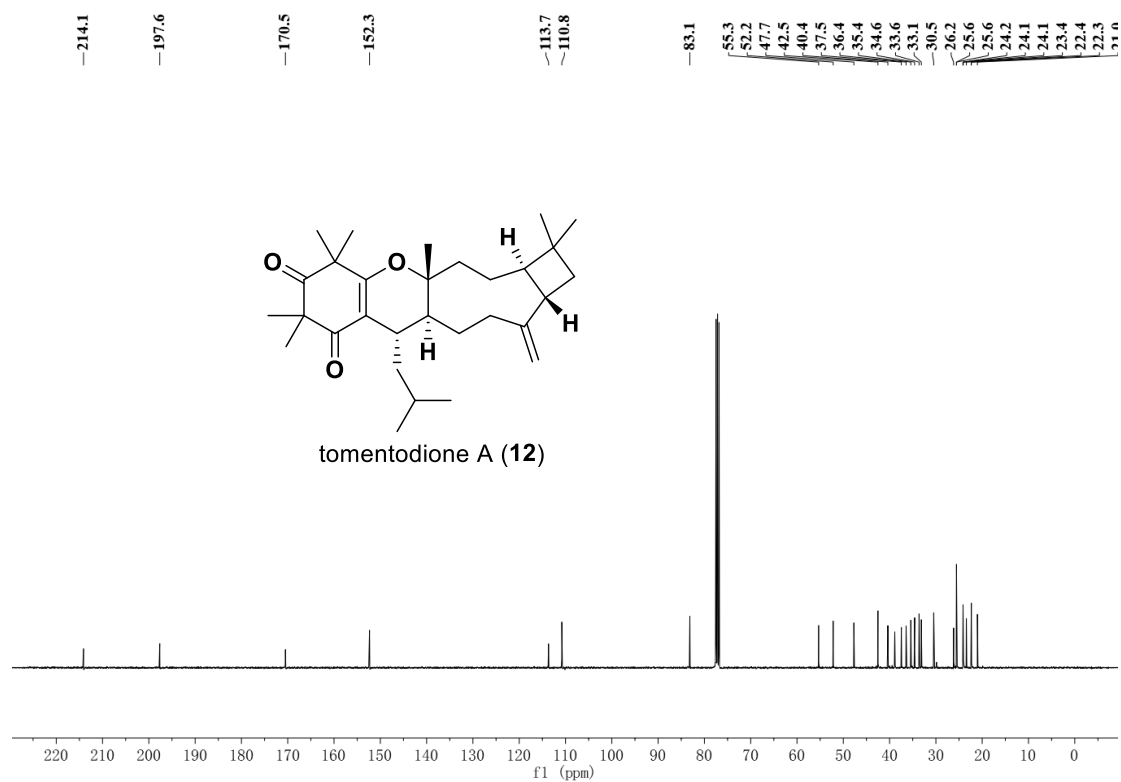

**Figure S36.**  $^{13}\text{C}$  NMR spectrum (100 MHz) of tomentodione A (12) in  $\text{CDCl}_3$ .

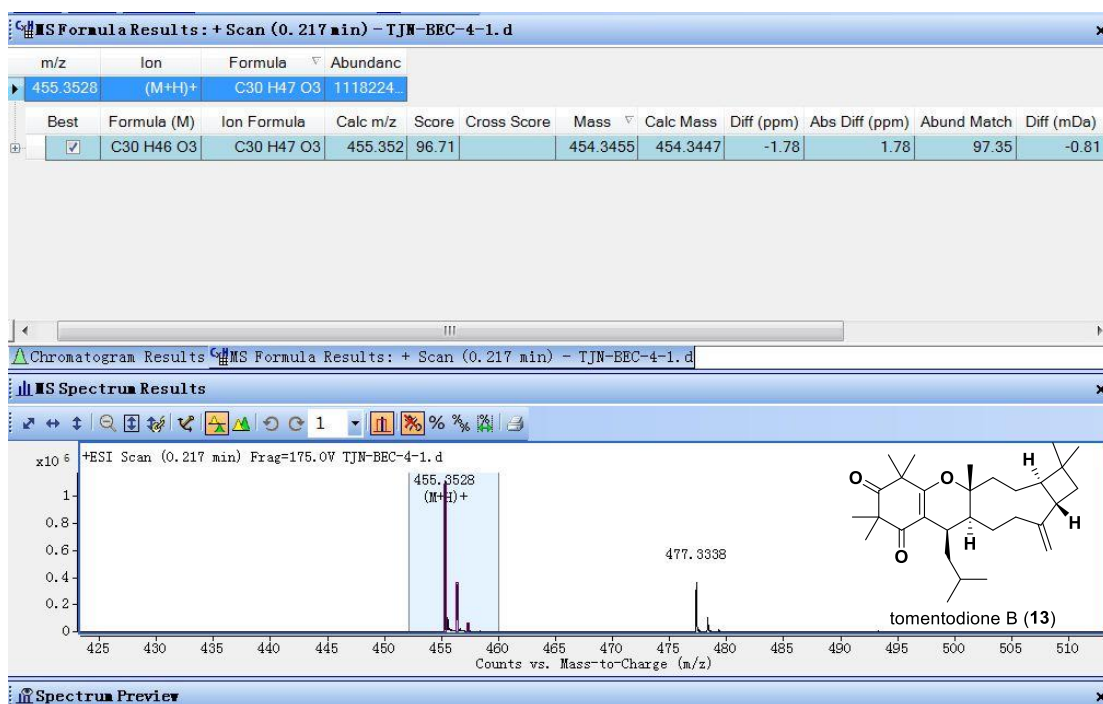

Figure S37. HR-ESI-MS spectrum of tomentodione B (13).

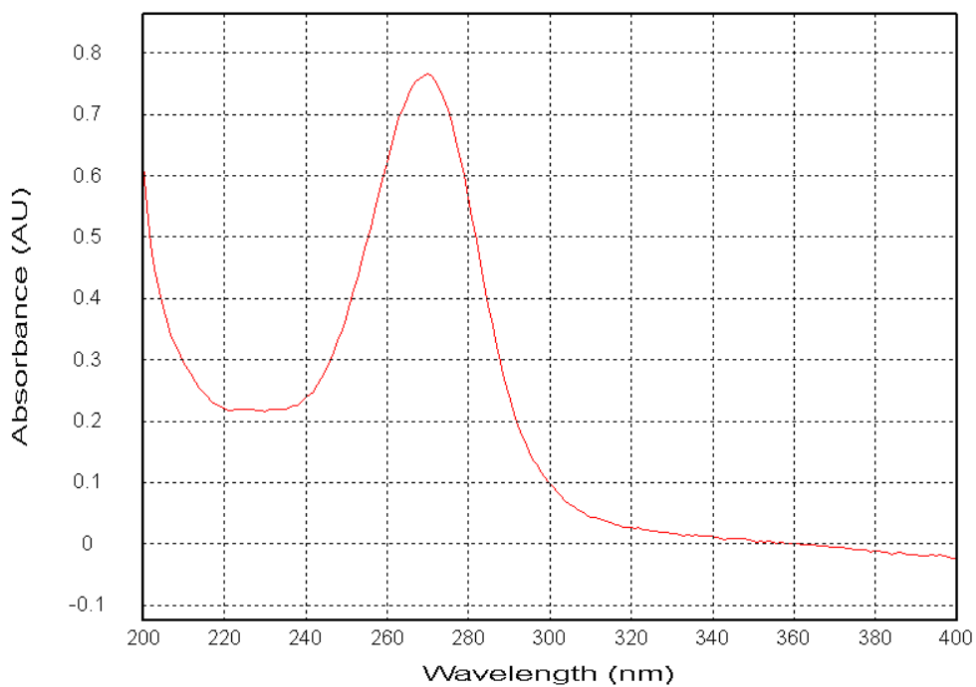

Figure S38. UV spectrum of tomentodione B (13) in MeOH.

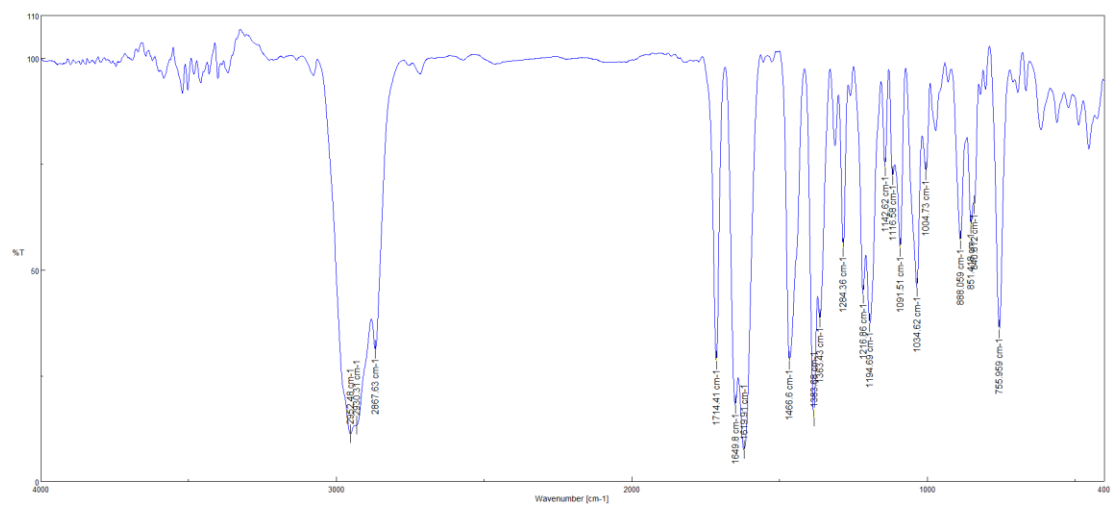

**Figure S39.** IR spectrum of tomentodione B (**13**) (KBr disc).

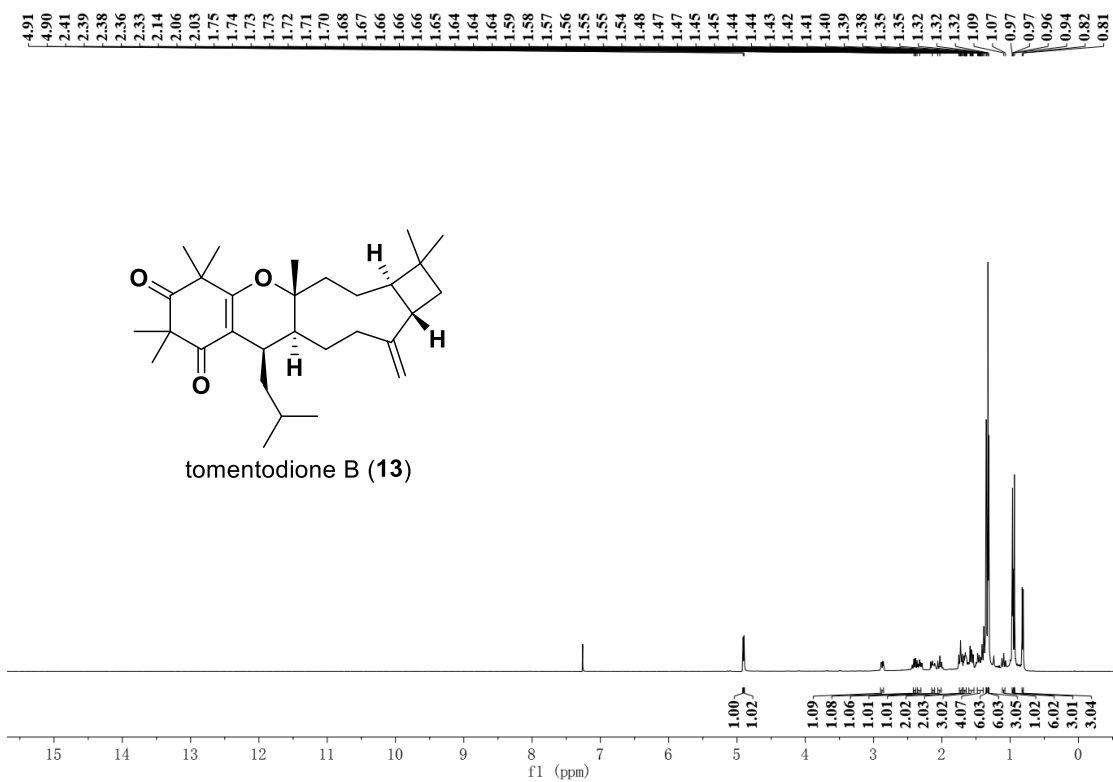

**Figure S40.**  $^1\text{H}$  NMR spectrum (400 MHz) of tomentodione B (**13**) in  $\text{CDCl}_3$ .

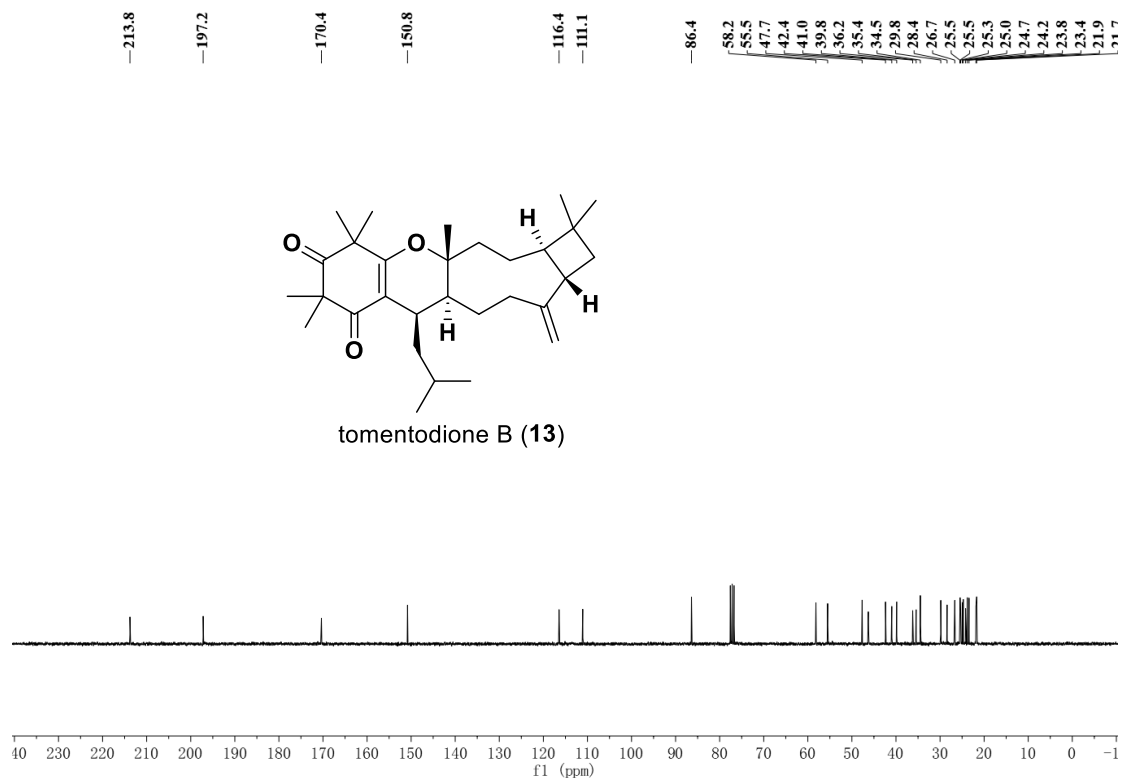

Figure S41. <sup>13</sup>C NMR spectrum (100 MHz) of tomentodione B (13) in CDCl<sub>3</sub>.

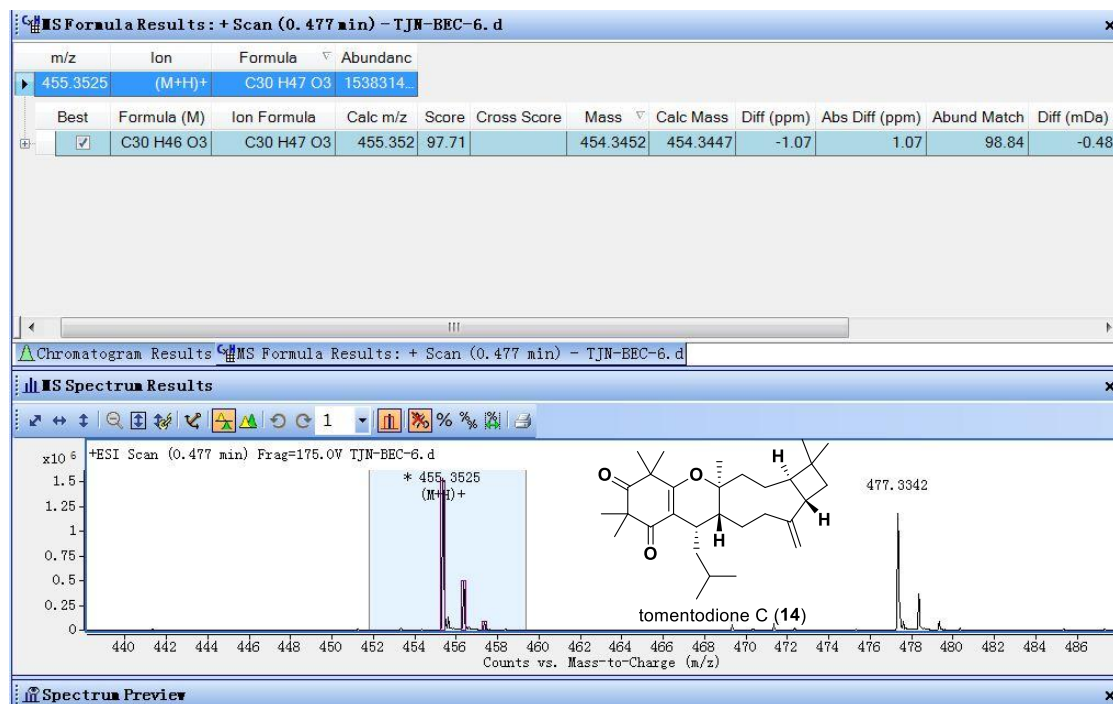

Figure S42. HR-ESI-MS spectrum of tomentodione C (14).



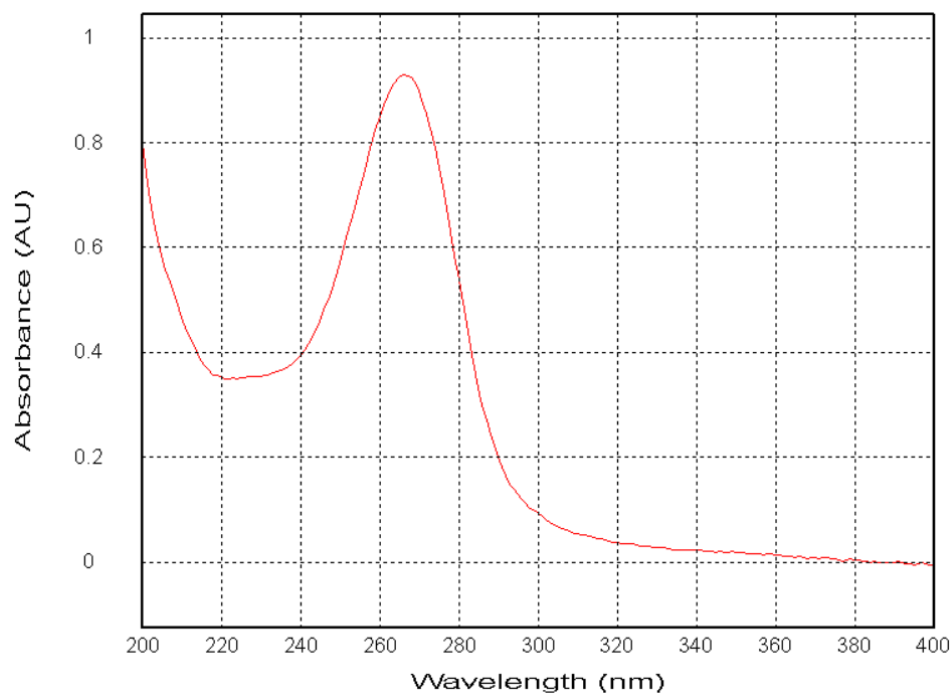

**Figure S43.** UV spectrum of tomentodione C (**14**) in MeOH.

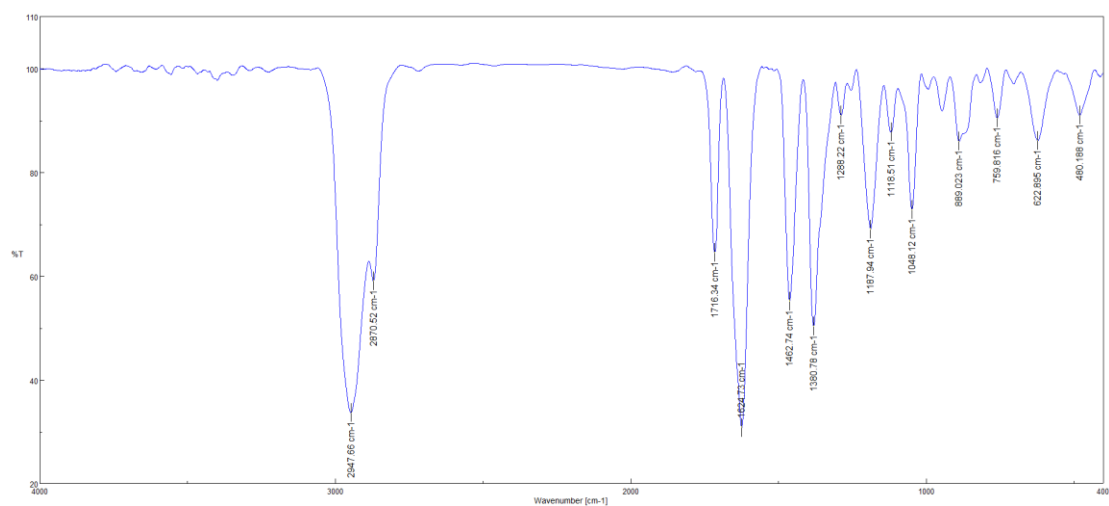

**Figure S44.** IR spectrum of tomentodione C (**14**) (KBr disc).

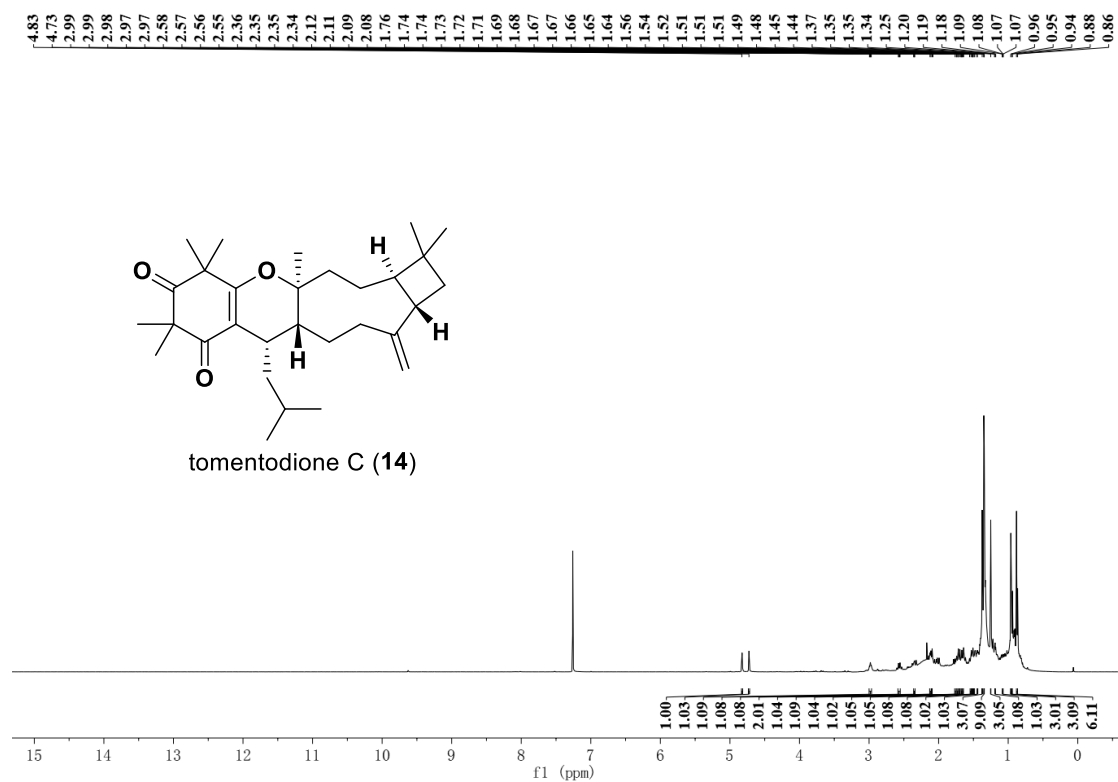

**Figure S45.**  $^1\text{H}$  NMR spectrum (300 MHz) of tomentodione C (**14**) in  $\text{CDCl}_3$ .

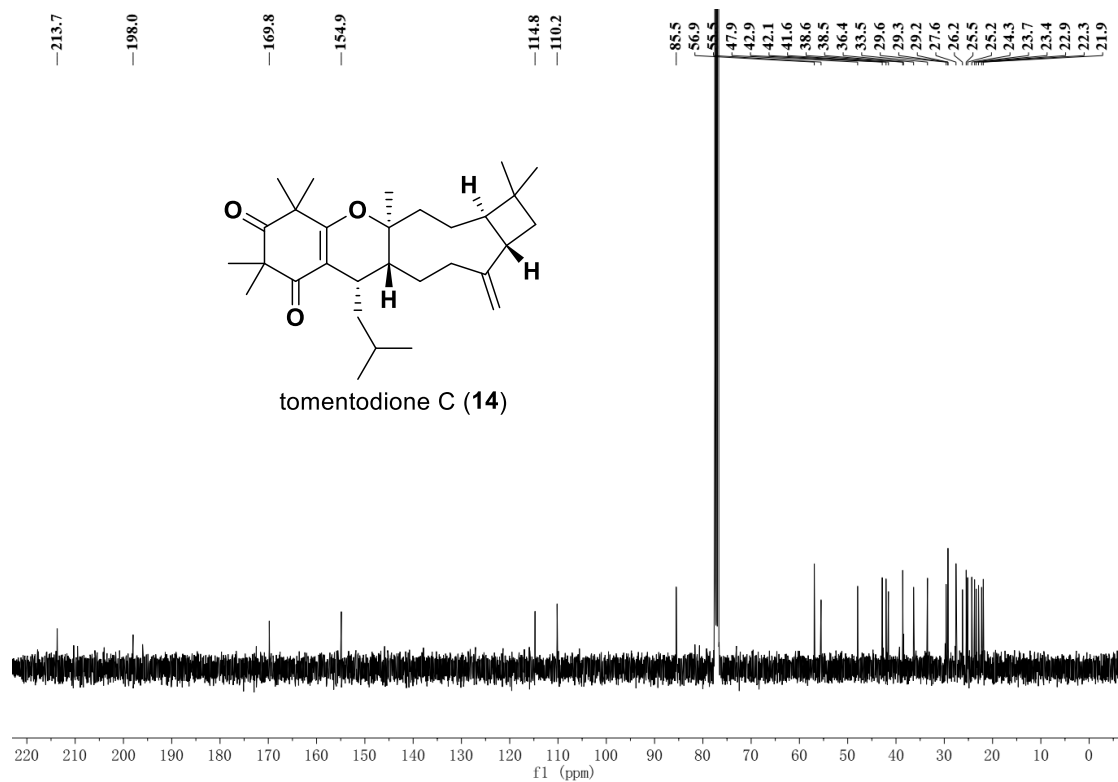

**Figure S46.**  $^{13}\text{C}$  NMR spectrum (75 MHz) of tomentodione C (**14**) in  $\text{CDCl}_3$ .

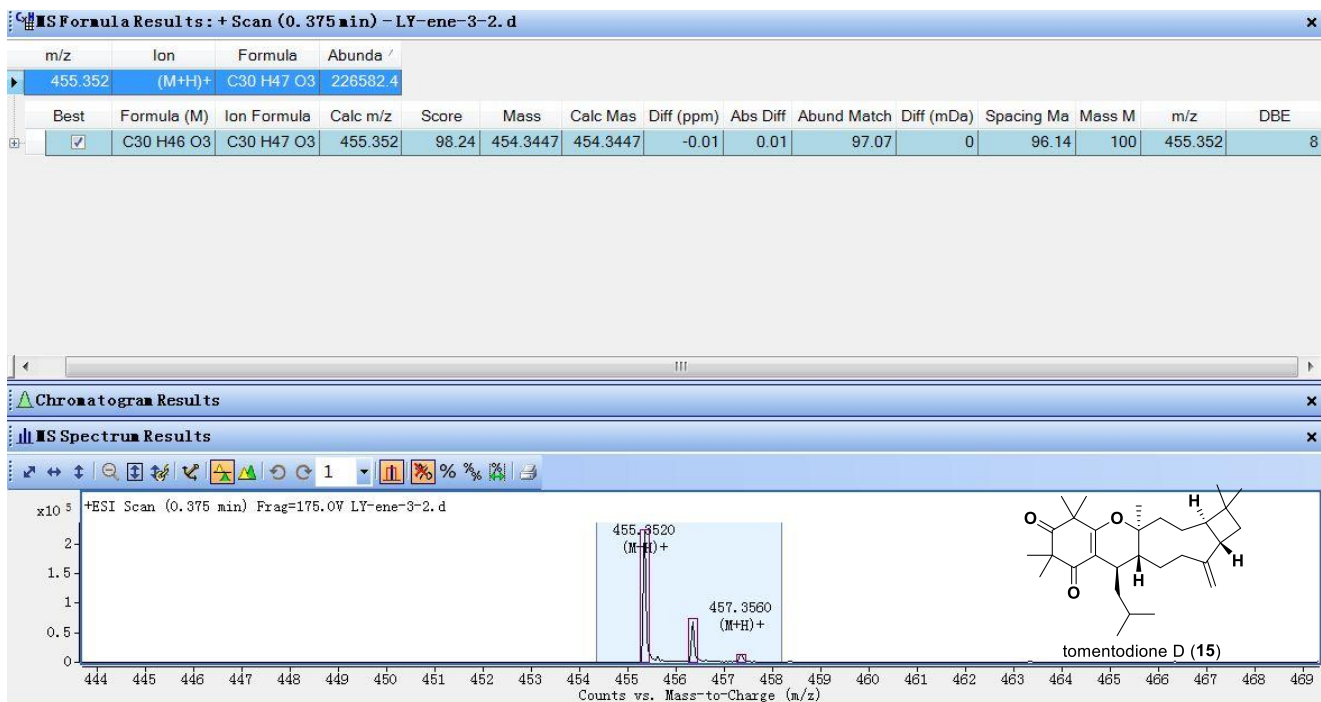

Figure S47. HR-ESI-MS spectrum of tomentodione D (15).

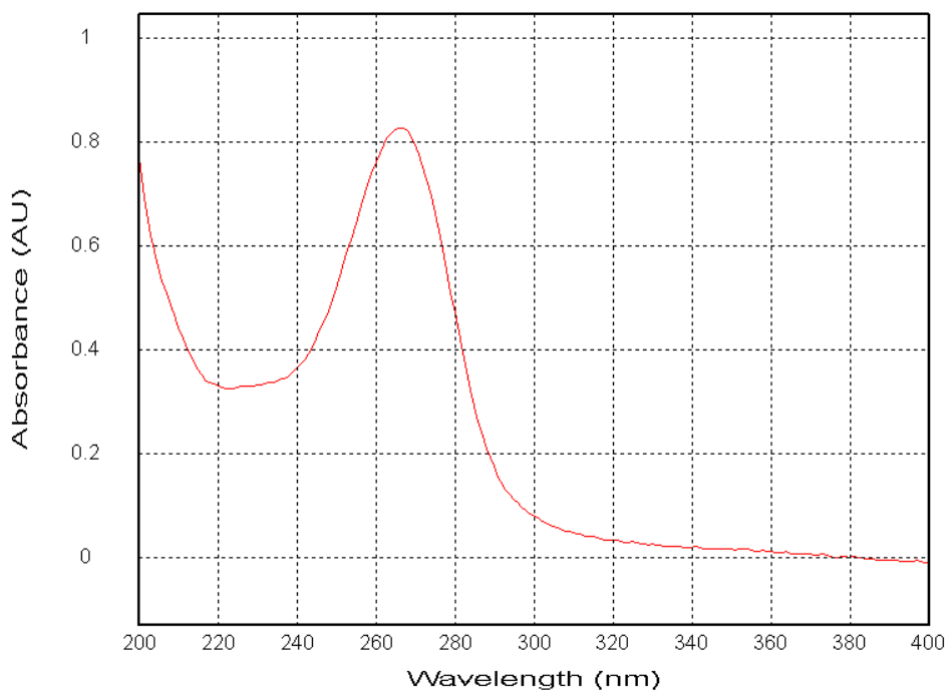

Figure S48. UV spectrum of tomentodione D (15) in MeOH.

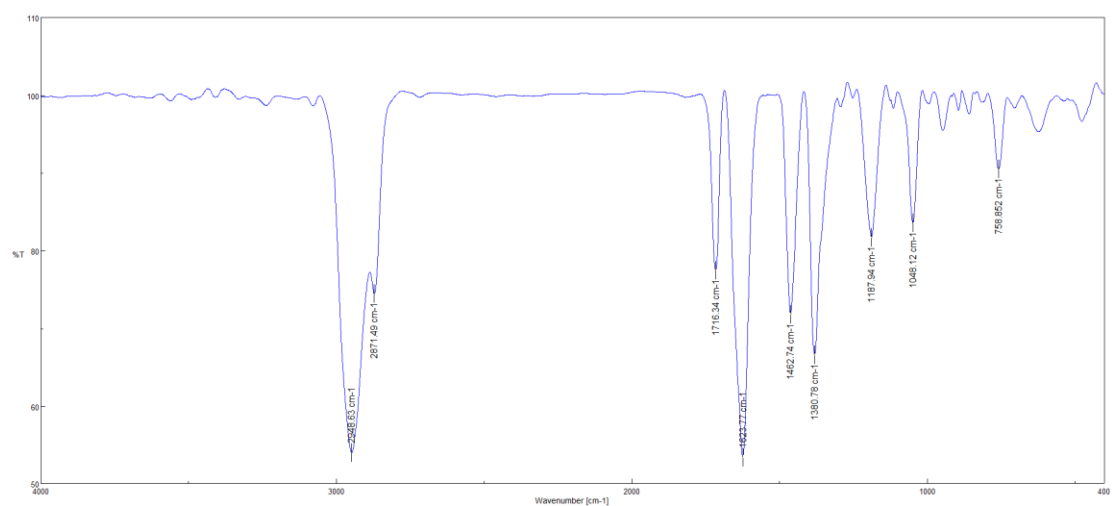

**Figure S49.** IR spectrum of tomentodione D (**15**) (KBr disc).

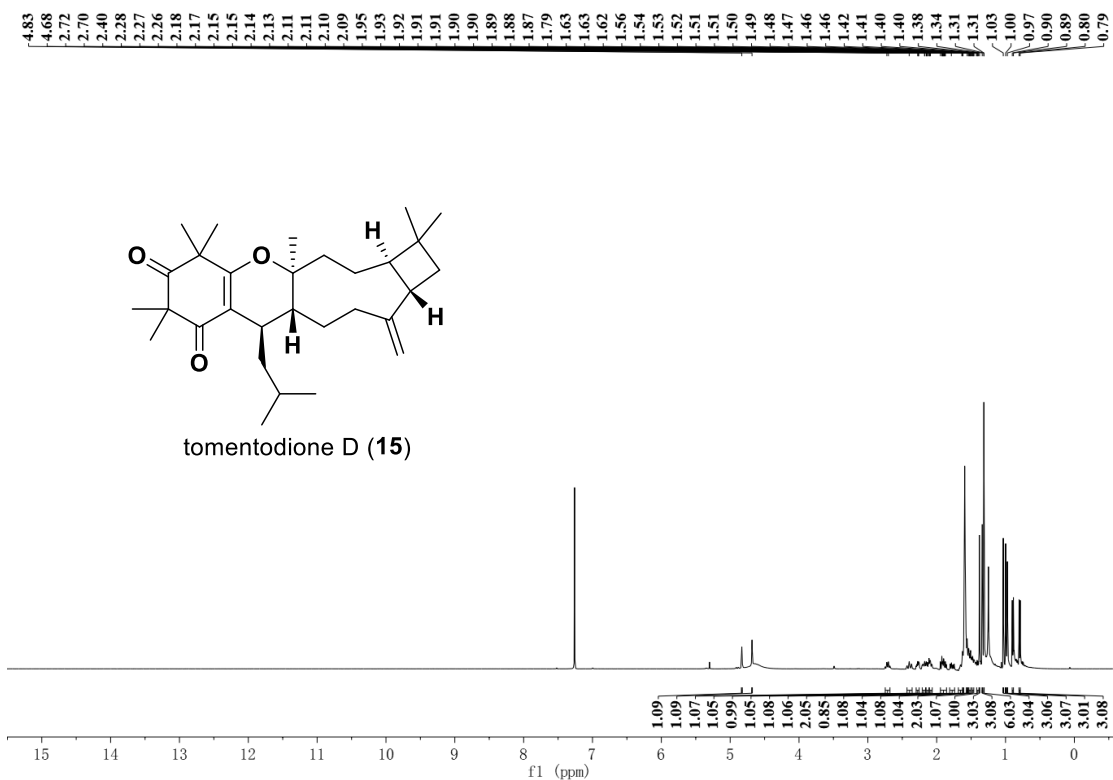

**Figure S50.**  $^1\text{H}$  NMR spectrum (400 MHz) of tomentodione D (**15**) in  $\text{CDCl}_3$ .

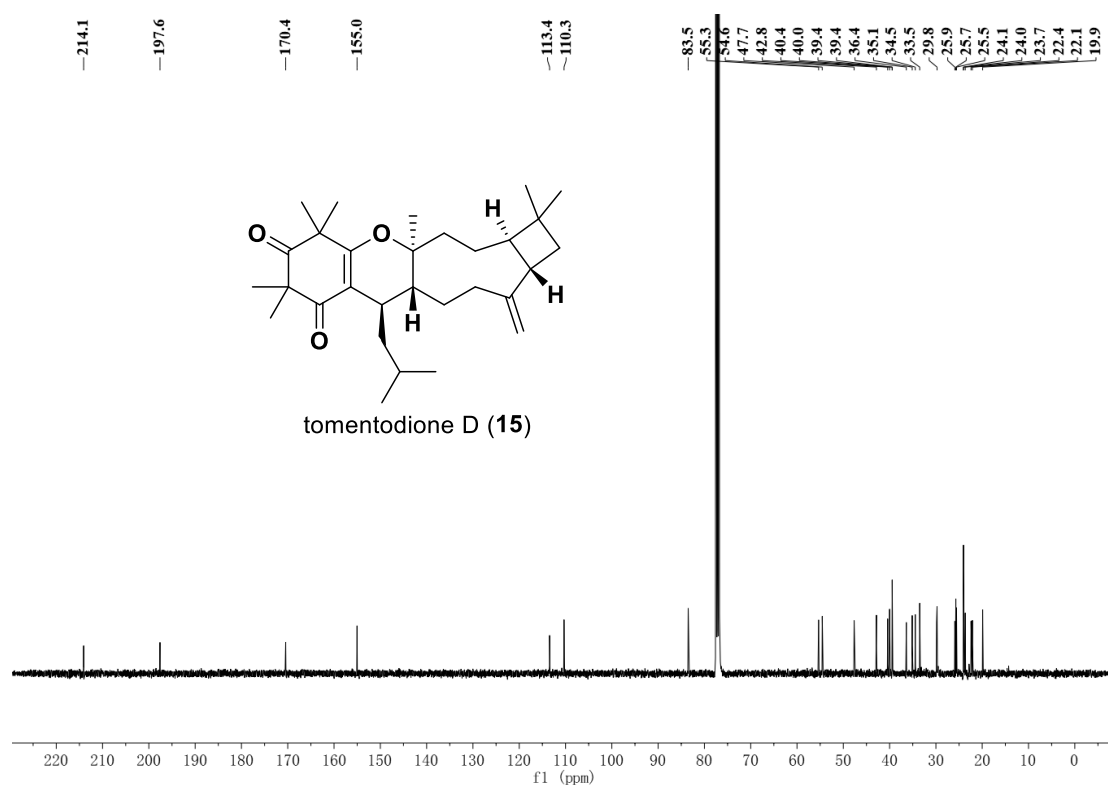

**Figure S51.**  $^{13}\text{C}$  NMR spectrum (100 MHz) of tomentodione D (**15**) in  $\text{CDCl}_3$ .

## 5. Synthetic experimental procedures

### 5.1 General information

Unless otherwise mentioned, all reactions were carried out under a nitrogen atmosphere under anhydrous conditions, and all reagents were purchased from commercial suppliers without further purification. Solvent purifications were conducted according to Purification of Laboratory Chemicals (Perrin, D. D.; Armarego, W. L. and Perrins, D. R., Pergamon Press: Oxford, 1980). Yields refer to chromatographically and spectroscopically ( $^1\text{H}$  NMR) homogeneous materials, unless otherwise stated. Reactions were monitored by thin layer chromatography (TLC) on plates (GF254) supplied by Yantai Chemicals (P. R. China) using UV light as visualizing agent, an ethanolic solution of *p*-anisaldehyde, and heat as developing agent. If not specially mentioned, flash column chromatography used silica gel (200–300 mesh) supplied by Tsingtao Haiyang Chemicals (P. R. China), Preparative thin layer chromatography (PTLC) separations were carried out 0.50 mm Yantai (P. R. China) silica gel plates. NMR spectra were recorded on Bruker AV400 and Bruker AV300, and calibrated using residual undeuterated solvent as an internal reference ( $\text{CHCl}_3$ ,  $\delta$  7.26 ppm  $^1\text{H}$  NMR,  $\delta$  77.00  $^{13}\text{C}$  NMR). The following abbreviations were used to explain the multiplicities: s = singlet, d = doublet, t = triplet, q = quartet, b = broad, and m = multiplet.

The analytic and preparative HPLC were performed on an Agilent 1260 instrument equipped with a multiple wavelength diode array detector (DAD), accompanied by Cosmosil  $\text{C}_{18}$  ( $4.6 \times 250$  mm,  $5.0 \mu\text{m}$ ) and Cosmosil  $5\text{C}_{18}\text{-MS-II}$  ( $10 \times 250$  mm,  $5.0 \mu\text{m}$ ) columns, respectively. HR-ESI-MS spectra were acquired on an Agilent 6210 ESI/TOF mass spectrometer (Agilent, Palo Alto, CA, USA). IR spectra were recorded on a JASCO FT/IR-480 plus Fourier Transform infrared spectrometer (JASCO, Tokyo, Japan) using KBr pellets. Optical rotations were measured on a JASCO P-1020 polarimeter (JASCO, Tokyo, Japan) with a 1 cm cell at room temperature.

## 5.2 Syntheses of 7 and 12–15

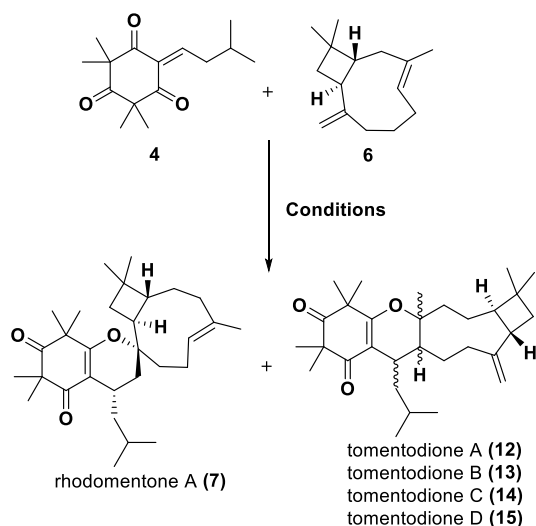

**Table S14.** Condition screen for the syntheses of compounds **7** and **12–15**.

| entry <sup>a</sup> | catalyst          | mol % | solvent                           | temp (°C) | time (h) | Yield (%) <sup>b</sup> | 7:12:13:14:15 |
|--------------------|-------------------|-------|-----------------------------------|-----------|----------|------------------------|---------------|
| 1                  | –                 | –     | DCM                               | 40        | 24       | 25                     | 16:10:15:5:1  |
| 2                  | –                 | –     | H <sub>2</sub> O                  | 100       | 24       | trace                  | –             |
| 3                  | –                 | –     | toluene                           | rt        | 48       | 28                     | 9:19:31:11:1  |
| 4                  | –                 | –     | toluene                           | 60        | 24       | 30                     | 14:13:26:9:1  |
| 5                  | –                 | –     | toluene                           | 80        | 24       | 36                     | 32:22:14:19:1 |
| 6                  | –                 | –     | toluene                           | 110       | 24       | 45                     | 5:6:9:5:1     |
| 7                  | DEAC              | 60    | toluene                           | 110       | 24       | trace                  | –             |
| 8                  | ZnF <sub>2</sub>  | 60    | toluene                           | 110       | 24       | 23                     | 9:7:4:10:1    |
| 9                  | ZnCl <sub>2</sub> | 60    | toluene                           | 110       | 24       | 32                     | 8:6:3:7:1     |
| 10                 | ZnI <sub>2</sub>  | 60    | toluene                           | 110       | 1        | 53                     | 6:5:2:9:1     |
| 11                 | –                 | –     | neat                              | rt        | 24       | 48                     | 13:11:20:9:1  |
| 12                 | –                 | –     | neat                              | 80        | 24       | 55                     | 13:9:16:6:1   |
| 13                 | –                 | –     | toluene/H <sub>2</sub> O<br>(1:1) | 110       | 24       | 49                     | 14:8:14:4:1   |
| 14                 | –                 | –     | toluene/H <sub>2</sub> O<br>(2:1) | 110       | 24       | 60                     | 15:9:14:5:1   |
| 15                 | –                 | –     | toluene/H <sub>2</sub> O<br>(1:2) | 110       | 24       | 50                     | 14:7:13:4:1   |

<sup>a</sup> Unless otherwise stated, the reactions of entries 1–15 were performed with **4** (0.4 mmol) and **6** (0.4 mmol). <sup>b</sup> Combined isolated yield.

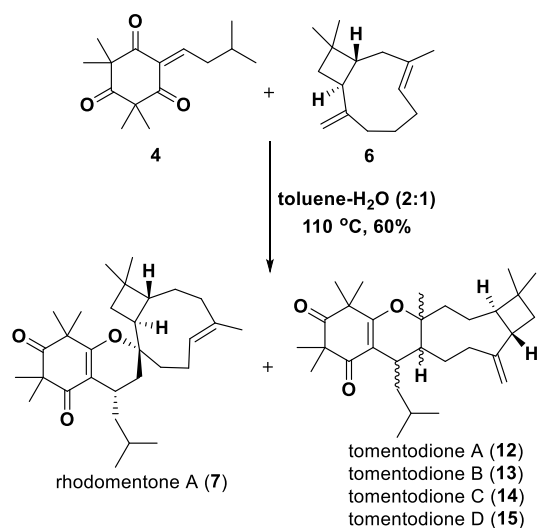

Compound **4** (100 mg, 0.4 mmol) in a toluene-H<sub>2</sub>O (2:1) solution (4 mL) was added  $\beta$ -caryophyllene (**6**) (91  $\mu$ L, 0.4 mmol) under reflux at 110 °C (entry 14). The resulting mixture was stirred for 24 h. After the reaction was finished according to TLC, the mixture was concentrated *in vacuo*. The crude residue was further purified by preparative HPLC (CH<sub>3</sub>CN-H<sub>2</sub>O, 95:5) to afford corresponding products **7** and **12–15**.

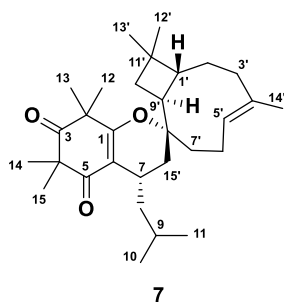

Compound **7**: 36.3 mg, 20% yield, colorless needle crystals, mp 156–158 °C;

$R_f$  = 0.53 (petroleum ether/ethyl acetate, 20/1);

$[\alpha]_D^{25} = -23.2^\circ$  (*c* 0.5, MeOH);

**IR** (KBr)  $\nu_{\max}$ : 2948, 2867, 1715, 1647, 1617, 1462, 1385, 1359, 1284, 1185, 1080, 1045, 977, 891, 851, 757, 619, 468 cm<sup>-1</sup>;

**<sup>1</sup>H NMR** (300 MHz, CDCl<sub>3</sub>)  $\delta$  5.20 (brs, 1H), 2.89 (m, 1H), 1.83 (m, 1H), 1.70 (s, 3H), 1.67 (m, 1H), 1.39 (m, 1H), 1.35 (m, 1H), 1.31 (s, 3H), 1.31 (s, 3H), 1.31 (s, 3H), 1.26 (s, 3H), 1.24 (m, 1H), 1.08 (d, *J* = 6.5 Hz, 3H), 0.97 (d, *J* = 6.5 Hz, 3H), 0.96 (s, 3H), 0.92 (brs, 3H);

**<sup>13</sup>C NMR** (75 MHz, CDCl<sub>3</sub>)  $\delta$  213.9, 197.9, 169.2, 109.9, 55.5, 48.1, 42.3, 37.4, 32.7, 29.8, 26.8, 25.7, 25.4, 25.3, 24.6, 24.2, 23.0, 22.5, 21.0;

**HRMS** (ESI) calcd for C<sub>30</sub>H<sub>47</sub>O<sub>3</sub> [M+H]<sup>+</sup> Exact Mass: 455.3520; found: 455.3523.

**Table S15.** NMR data (CDCl<sub>3</sub>) comparison between synthetic **7** and the isolated natural product.

| position | <sup>1</sup> H & ppm (J)              |                                       |                     | <sup>13</sup> C & ppm |                   |                     |
|----------|---------------------------------------|---------------------------------------|---------------------|-----------------------|-------------------|---------------------|
|          | isolated (400M)                       | synthesized (300M)                    | error (iso. - syn.) | isolated (100M)       | synthesized (75M) | error (iso. - syn.) |
| 1        | -                                     | -                                     | -                   | 169.2                 | 169.2             | 0                   |
| 2        | -                                     | -                                     | -                   | 48.1                  | 48.1              | 0                   |
| 3        | -                                     | -                                     | -                   | 213.8                 | 213.9             | -0.1                |
| 4        | -                                     | -                                     | -                   | 55.5                  | 55.5              | 0                   |
| 5        | -                                     | -                                     | -                   | 197.9                 | 197.9             | 0                   |
| 6        | -                                     | -                                     | -                   | 109.9                 | 109.9             | 0                   |
| 7        | 2.91 (m, 1H)                          | 2.89 (m, 1H)                          | 0.02                | 24.6                  | 24.6              | 0                   |
| 8a       | 1.40 <sup>a</sup> (m, 1H)             | 1.39 <sup>a</sup> (m, 1H)             | 0.01                | 42.3                  | 42.3              | 0                   |
| 8b       | 1.24 <sup>a</sup> (m, 1H)             | 1.24 <sup>a</sup> (m, 1H)             | 0                   |                       |                   |                     |
| 9        | 1.83 <sup>a</sup> (m, 1H)             | 1.83 <sup>a</sup> (m, 1H)             | 0                   | 25.7                  | 25.7              | 0                   |
| 10       | 1.08 (d, J = 6.4 Hz, 3H)              | 1.08 (d, J = 6.5 Hz, 3H)              | 0                   | 21.0                  | 21.0              | 0                   |
| 11       | 0.97 <sup>a</sup> (d, J = 6.4 Hz, 3H) | 0.97 <sup>a</sup> (d, J = 6.5 Hz, 3H) | 0                   | 24.2                  | 24.2              | 0                   |
| 12       | 1.26 (s, 3H)                          | 1.26 (s, 3H)                          | 0                   | 25.4                  | 25.4              | 0                   |
| 13       | 1.32 <sup>a</sup> (s, 3H)             | 1.31 <sup>a</sup> (s, 3H)             | 0.01                | 25.3                  | 25.3              | 0                   |
| 14       | 1.32 <sup>a</sup> (s, 3H)             | 1.31 <sup>a</sup> (s, 3H)             | 0.01                | 26.8                  | 26.8              | 0                   |
| 15       | 1.31 <sup>a</sup> (s, 3H)             | 1.31 <sup>a</sup> (s, 3H)             | 0                   | 22.4                  | 22.5              | -0.1                |
| 1'       | c                                     | c                                     |                     | b                     | b                 |                     |
| 2'       | c                                     | c                                     |                     | b                     | b                 |                     |
| 3'a      | c                                     | c                                     |                     | b                     | b                 |                     |
| 3'b      | c                                     | c                                     |                     |                       |                   |                     |
| 4'       | -                                     | -                                     |                     | b                     | b                 |                     |
| 5'       | 5.20 (brs, 1H)                        | 5.20 (brs, 1H)                        | 0                   | b                     | b                 |                     |
| 6'a      | c                                     | c                                     |                     | b                     | b                 |                     |
| 6'b      | c                                     | c                                     |                     |                       |                   |                     |
| 7'a      | c                                     | c                                     |                     | b                     | b                 |                     |
| 7'b      | c                                     | c                                     |                     |                       |                   |                     |
| 8'       | -                                     | -                                     |                     | b                     | b                 |                     |
| 9'       | c                                     | c                                     |                     | b                     | b                 |                     |
| 10'a     | 1.67 <sup>a</sup> (m, 1H)             | 1.67 <sup>a</sup> (m, 1H)             | 0                   | 37.4                  | 37.4              | 0                   |
| 10'b     | 1.35 <sup>a</sup> (m, 1H)             | 1.35 <sup>a</sup> (m, 1H)             | 0                   |                       |                   |                     |
| 11'      | -                                     | -                                     |                     | 32.7                  | 32.7              | 0                   |
| 12'      | 0.90 (brs, 3H)                        | 0.92 (brs, 3H)                        | -0.02               | 29.9                  | 29.8              | 0.1                 |
| 13'      | 0.96 <sup>a</sup> (s, 3H)             | 0.96 <sup>a</sup> (s, 3H)             | 0                   | 22.8                  | 23.0              | -0.2                |
| 14'      | 1.71 (s, 3H)                          | 1.70 (s, 3H)                          | 0.01                | b                     | b                 |                     |
| 15'a     | c                                     | c                                     |                     | b                     | b                 |                     |
| 15'b     | c                                     | c                                     |                     |                       |                   |                     |

<sup>a</sup> Overlapped signals, <sup>b</sup> Signals invisible, <sup>c</sup> Signals unassigned

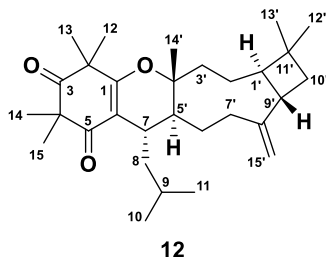

Compound **12**: 21.8 mg, 12% yield, yellow oil;

$R_f = 0.38$  (petroleum ether/ethyl acetate, 20/1);

$[\alpha]_D^{25} = +78.5^\circ$  (c 1.0, MeOH);

**IR** (KBr)  $\nu_{\max}$ : 2949, 2871, 1716, 1624, 1463, 1381, 1188, 1048, 759  $\text{cm}^{-1}$ ;

**<sup>1</sup>H NMR** (400 MHz, CDCl<sub>3</sub>)  $\delta$  4.91 (s, 1H), 4.88 (s, 1H), 2.47 (dt,  $J = 13.8, 5.1$  Hz, 1H), 2.39 (m, 1H), 2.26 (m, 1H), 2.11 (m, 1H), 2.08 (m, 1H), 2.08 (m, 1H), 2.03 (m, 1H), 1.90 (m, 1H), 1.81 (m, 1H), 1.78 (m, 1H), 1.74 (m, 1H), 1.68 (m, 1H), 1.62 (m, 1H), 1.46 (m, 1H), 1.43 (m, 1H), 1.40 (m, 1H), 1.37 (s, 3H), 1.33 (s, 3H), 1.32 (s, 3H), 1.32 (m, 1H), 1.31 (s, 3H), 1.06 (s, 3H), 0.98 (s, 3H), 0.98 (s, 3H), 0.83 (d,  $J = 6.5$  Hz, 3H), 0.75 (d,  $J = 6.5$  Hz, 3H);

**<sup>13</sup>C NMR** (100 MHz, CDCl<sub>3</sub>)  $\delta$  214.1, 197.7, 170.6, 152.3, 113.7, 110.8, 83.2, 55.3, 52.2, 47.7, 42.5, 40.4, 38.9, 37.5, 36.4, 35.4, 34.6, 33.6, 33.1, 30.5, 26.2, 25.6, 25.6, 24.2, 24.1, 24.1, 23.4, 22.4, 22.3, 21.0;

**HRMS** (ESI) calcd for C<sub>30</sub>H<sub>47</sub>O<sub>3</sub> [M+H]<sup>+</sup> Exact Mass: 455.3520; found: 455.3521.



**Table S16.** NMR data (CDCl<sub>3</sub>) comparison between synthetic **12** and the isolated natural product.

| position | <sup>1</sup> H & ppm (J)  |                                 |                     | <sup>13</sup> C & ppm |                    |                     |
|----------|---------------------------|---------------------------------|---------------------|-----------------------|--------------------|---------------------|
|          | isolated (400M)           | synthesized (400M)              | error (iso. - syn.) | isolated (100M)       | synthesized (100M) | error (iso. - syn.) |
| 1        | -                         | -                               | -                   | 170.5                 | 170.6              | -0.1                |
| 2        | -                         | -                               | -                   | 47.7                  | 47.7               | 0                   |
| 3        | -                         | -                               | -                   | 214.1                 | 214.1              | 0                   |
| 4        | -                         | -                               | -                   | 55.3                  | 55.3               | 0                   |
| 5        | -                         | -                               | -                   | 197.6                 | 197.7              | -0.1                |
| 6        | -                         | -                               | -                   | 113.7                 | 113.7              | 0                   |
| 7        | 2.26 (m, 1H)              | 2.26 (m, 1H)                    | 0                   | 34.6                  | 34.6               | 0                   |
| 8a       | 1.82 (m, 1H)              | 1.81 (m, 1H)                    | 0.01                | 38.9                  | 38.9               | 0                   |
| 8b       | 1.31 <sup>a</sup> (m, 1H) | 1.32 <sup>a</sup> (m, 1H)       | -0.01               |                       |                    |                     |
| 9        | 1.47 <sup>a</sup> (m, 1H) | 1.46 <sup>a</sup> (m, 1H)       | 0.01                | 25.6                  | 25.6               | 0                   |
| 10       | 0.75 (d, J = 6.6 Hz, 3H)  | 0.75 (d, J = 6.5 Hz, 3H)        | 0                   | 24.2                  | 24.2               | 0                   |
| 11       | 0.83 (d, J = 6.6 Hz, 3H)  | 0.83 (d, J = 6.5 Hz, 3H)        | 0                   | 24.1                  | 24.1               | 0                   |
| 12       | 1.37 (s, 3H)              | 1.37 (s, 3H)                    | 0                   | 24.1                  | 24.1               | 0                   |
| 13       | 1.32 (s, 3H)              | 1.32 (s, 3H)                    | 0                   | 25.6                  | 25.6               | 0                   |
| 14       | 1.31 (s, 3H)              | 1.31 (s, 3H)                    | 0                   | 23.4                  | 23.4               | 0                   |
| 15       | 1.33 (s, 3H)              | 1.33 (s, 3H)                    | 0                   | 26.2                  | 26.2               | 0                   |
| 1'       | 2.03 (m, 1H)              | 2.03 (m, 1H)                    | 0                   | 52.2                  | 52.2               | 0                   |
| 2'a      | 1.78 <sup>a</sup> (m, 1H) | 1.78 <sup>a</sup> (m, 1H)       | 0                   | 22.4                  | 22.4               | 0                   |
| 2'b      | 1.40 <sup>a</sup> (m, 1H) | 1.40 <sup>a</sup> (m, 1H)       | 0                   |                       |                    |                     |
| 3'a      | 2.08 <sup>a</sup> (m, 1H) | 2.08 <sup>a</sup> (m, 1H)       | 0                   | 37.5                  | 37.5               | 0                   |
| 3'b      | 1.90 (m, 1H)              | 1.90 (m, 1H)                    | 0                   |                       |                    |                     |
| 4'       | -                         | -                               | -                   | 83.1                  | 83.2               | -0.1                |
| 5'       | 2.08 <sup>a</sup> (m, 1H) | 2.08 <sup>a</sup> (m, 1H)       | 0                   | 40.4                  | 40.4               | 0                   |
| 6'a      | 1.74 (m, 1H)              | 1.74 (m, 1H)                    | 0                   | 33.1                  | 33.1               | 0                   |
| 6'b      | 1.43 <sup>a</sup> (m, 1H) | 1.43 <sup>a</sup> (m, 1H)       | 0                   |                       |                    |                     |
| 7'a      | 2.47 (m, 1H)              | 2.47 (dt, J = 13.8, 5.1 Hz, 1H) | 0                   | 35.4                  | 35.4               | 0                   |
| 7'b      | 2.12 <sup>a</sup> (m, 1H) | 2.11 <sup>a</sup> (m, 1H)       | 0.01                |                       |                    |                     |
| 8'       | -                         | -                               | -                   | 152.3                 | 152.3              | 0                   |
| 9'       | 2.39 (m, 1H)              | 2.39 (m, 1H)                    | 0                   | 42.5                  | 42.5               | 0                   |
| 10'a     | 1.68 (m, 1H)              | 1.68 (m, 1H)                    | 0                   | 36.4                  | 36.4               | 0                   |
| 10'b     | 1.61 (m, 1H)              | 1.62 (m, 1H)                    | -0.01               |                       |                    |                     |
| 11'      | -                         | -                               | -                   | 33.6                  | 33.6               | 0                   |
| 12'      | 0.98 <sup>a</sup> (s, 3H) | 0.98 <sup>a</sup> (s, 3H)       | 0                   | 30.5                  | 30.5               | 0                   |
| 13'      | 0.98 <sup>a</sup> (s, 3H) | 0.98 <sup>a</sup> (s, 3H)       | 0                   | 22.3                  | 22.3               | 0                   |
| 14'      | 1.06 (s, 3H)              | 1.06 (s, 3H)                    | 0                   | 21.0                  | 21.0               | 0                   |
| 15'a     | 4.91 (s, 1H)              | 4.91 (s, 1H)                    | 0                   | 110.8                 | 110.8              | 0                   |
| 15'b     | 4.88 (s, 1H)              | 4.88 (s, 1H)                    | 0                   |                       |                    |                     |

<sup>a</sup> Overlapped signals

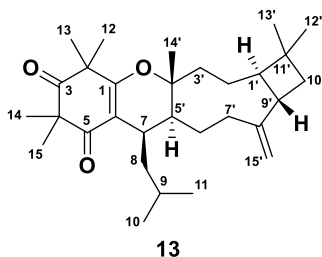

Compound **13**: 36.3 mg, 20% yield, yellow oil;

$R_f = 0.35$  (petroleum ether/ethyl acetate, 20/1);

$[\alpha]_D^{25} = +40.6^\circ$  (*c* 0.5, MeOH);

**IR** (KBr)  $\nu_{\max}$ : 2938, 2868, 1713, 1648, 1621, 1459, 1383, 1282, 1190, 890, 843, 759  $\text{cm}^{-1}$ ;

**<sup>1</sup>H NMR** (400 MHz, CDCl<sub>3</sub>)  $\delta$  4.92 (s, 1H), 4.90 (s, 1H), 2.88 (m, 1H), 2.40 (m, 1H), 2.33 (m, 1H), 2.13 (m, 1H), 2.04 (m, 1H), 1.75 (m, 1H), 1.73 (m, 1H), 1.67 (m, 2H), 1.55-1.61 (m, 2H), 1.59 (m, 1H), 1.50 (m, 1H), 1.48 (m, 1H), 1.41 (m, 1H), 1.39 (m, 1H), 1.36 (s, 3H), 1.35 (s, 3H), 1.33 (s, 3H), 1.33 (s, 3H), 1.32 (s, 3H), 1.10 (m, 1H), 0.97 (s, 3H), 0.97 (d, *J* = 6.0 Hz, 3H), 0.94 (s, 3H), 0.82 (d, *J* = 6.0 Hz, 3H);

**<sup>13</sup>C NMR** (100 MHz, CDCl<sub>3</sub>)  $\delta$  214.0, 197.3, 170.4, 150.9, 116.5, 111.1, 86.5, 58.2, 55.6, 47.7, 46.4, 42.4, 41.0, 39.9, 36.2, 35.4, 34.5, 29.9, 28.4, 26.7, 25.6, 25.5, 25.3, 25.0, 24.8, 24.3, 23.8, 23.5, 21.9, 21.7;

**HRMS** (ESI) calcd for C<sub>30</sub>H<sub>47</sub>O<sub>3</sub> [M+H]<sup>+</sup> Exact Mass: 455.3520; found: 455.3528.

**Table S17.** NMR data (CDCl<sub>3</sub>) comparison between synthetic **13** and the isolated natural product.

| position | <sup>1</sup> H & ppm (J)              |                                       |                     | <sup>13</sup> C & ppm |                    |                     |
|----------|---------------------------------------|---------------------------------------|---------------------|-----------------------|--------------------|---------------------|
|          | isolated (400M)                       | synthesized (400M)                    | error (iso. - syn.) | isolated (100M)       | synthesized (100M) | error (iso. - syn.) |
| 1        | -                                     | -                                     | -                   | 170.4                 | 170.4              | 0                   |
| 2        | -                                     | -                                     | -                   | 47.7                  | 47.7               | 0                   |
| 3        | -                                     | -                                     | -                   | 213.8                 | 214.0              | -0.2                |
| 4        | -                                     | -                                     | -                   | 55.5                  | 55.6               | -0.1                |
| 5        | -                                     | -                                     | -                   | 197.2                 | 197.3              | -0.1                |
| 6        | -                                     | -                                     | -                   | 116.4                 | 116.5              | -0.1                |
| 7        | 2.88 (m, 1H)                          | 2.88 (m, 1H)                          | 0                   | 28.4                  | 28.4               | 0                   |
| 8a       | 1.40 <sup>a</sup> (m, 1H)             | 1.41 <sup>a</sup> (m, 1H)             | -0.01               | 41.0                  | 41.0               | 0                   |
| 8b       | 1.10 (m, 1H)                          | 1.10 (m, 1H)                          | 0                   | -                     | -                  | -                   |
| 9        | 1.47 <sup>a</sup> (m, 1H)             | 1.48 <sup>a</sup> (m, 1H)             | -0.01               | 26.7                  | 26.7               | 0                   |
| 10       | 0.82 (d, J = 6.0 Hz, 3H)              | 0.82 (d, J = 6.0 Hz, 3H)              | 0                   | 24.7                  | 24.8               | -0.1                |
| 11       | 0.97 <sup>a</sup> (d, J = 6.0 Hz, 3H) | 0.97 <sup>a</sup> (d, J = 6.0 Hz, 3H) | 0                   | 21.7                  | 21.7               | 0                   |
| 12       | 1.32 <sup>a</sup> (s, 3H)             | 1.33 <sup>a</sup> (s, 3H)             | -0.01               | 25.0                  | 25.0               | 0                   |
| 13       | 1.35 (s, 3H)                          | 1.35 (s, 3H)                          | 0                   | 25.5                  | 25.5               | 0                   |
| 14       | 1.32 <sup>a</sup> (s, 3H)             | 1.33 <sup>a</sup> (s, 3H)             | -0.01               | 23.8                  | 23.8               | 0                   |
| 15       | 1.32 (s, 3H)                          | 1.32 (s, 3H)                          | 0                   | 25.5                  | 25.6               | -0.1                |
| 1'       | 1.49 <sup>a</sup> (m, 1H)             | 1.50 <sup>a</sup> (m, 1H)             | -0.01               | 58.2                  | 58.2               | 0                   |
| 2'       | 1.55-1.61 <sup>a</sup> (m, 2H)        | 1.55-1.61 <sup>a</sup> (m, 2H)        | 0                   | 24.2                  | 24.3               | -0.1                |
| 3'a      | 2.03 (m, 1H)                          | 2.04 (m, 1H)                          | -0.01               | 46.3                  | 46.4               | -0.1                |
| 3'b      | 1.39 <sup>a</sup> (m, 1H)             | 1.39 <sup>a</sup> (m, 1H)             | 0                   | -                     | -                  | -                   |
| 4'       | -                                     | -                                     | -                   | 86.4                  | 86.5               | -0.1                |
| 5'       | 1.74 <sup>a</sup> (m, 1H)             | 1.75 <sup>a</sup> (m, 1H)             | -0.01               | 39.8                  | 39.9               | -0.1                |
| 6'       | 1.66 (m, 2H)                          | 1.67 (m, 2H)                          | -0.01               | 25.3                  | 25.3               | 0                   |
| 7'a      | 2.33 (m, 1H)                          | 2.33 (m, 1H)                          | 0                   | 35.4                  | 35.4               | 0                   |
| 7'b      | 2.13 (m, 1H)                          | 2.13 (m, 1H)                          | 0                   | -                     | -                  | -                   |
| 8'       | -                                     | -                                     | -                   | 150.8                 | 150.9              | -0.1                |
| 9'       | 2.40 (m, 1H)                          | 2.40 (m, 1H)                          | 0                   | 42.4                  | 42.4               | 0                   |
| 10'a     | 1.72 <sup>a</sup> (m, 1H)             | 1.73 <sup>a</sup> (m, 1H)             | -0.01               | 36.2                  | 36.2               | 0                   |
| 10'b     | 1.59 <sup>a</sup> (m, 1H)             | 1.59 <sup>a</sup> (m, 1H)             | 0                   | -                     | -                  | -                   |
| 11'      | -                                     | -                                     | -                   | 34.5                  | 34.5               | 0                   |
| 12'      | 0.94 (s, 3H)                          | 0.94 (s, 3H)                          | 0                   | 29.8                  | 29.9               | -0.1                |
| 13'      | 0.97 <sup>a</sup> (s, 3H)             | 0.97 <sup>a</sup> (s, 3H)             | 0                   | 21.9                  | 21.9               | 0                   |
| 14'      | 1.35 (s, 3H)                          | 1.36 (s, 3H)                          | -0.01               | 23.4                  | 23.5               | -0.1                |
| 15'a     | 4.91 (s, 1H)                          | 4.92 (s, 1H)                          | -0.01               | 111.1                 | 111.1              | 0                   |
| 15'b     | 4.90 (s, 1H)                          | 4.90 (s, 1H)                          | 0                   | -                     | -                  | -                   |

<sup>a</sup> Overlapped signals

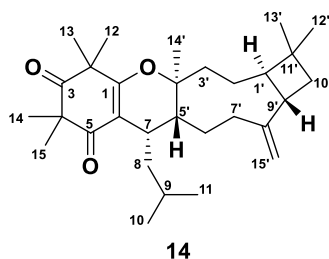

**14**

Compound **14**: 12.7 mg, 7% yield, yellow oil;

$R_f = 0.53$  (petroleum ether/ethyl acetate, 20/1);

$[\alpha]_D^{25} = -26.4^\circ$  (*c* 0.5, MeOH);

**IR** (KBr)  $\nu_{max}$ : 2950, 2871, 1716, 1623, 1463, 1381, 1188, 1048, 885, 761  $\text{cm}^{-1}$ ;

**<sup>1</sup>H NMR** (400 MHz, CDCl<sub>3</sub>)  $\delta$  4.83 (brs, 1H), 4.73 (brs, 1H), 2.98 (m, 1H), 2.57 (q, *J* = 9.2 Hz, 1H), 2.35 (m, 1H), 2.13 (m, 1H), 2.10 (m, 1H), 2.03 (m, 1H), 1.76 (m, 1H), 1.73 (m, 1H), 1.71 (m, 1H), 1.67 (m, 1H), 1.65 (m, 1H), 1.53 (m, 1H), 1.51 (m, 1H), 1.49 (m, 1H), 1.44 (m, 1H), 1.37 (s, 3H), 1.35 (s, 3H), 1.35 (s, 3H), 1.35 (s, 3H), 1.25 (s, 3H), 1.19 (m, 1H), 1.08 (m, 1H), 0.96 (s, 3H), 0.95 (d, *J* = 6.4 Hz, 3H), 0.88 (s, 3H), 0.87 (d, *J* = 6.4 Hz, 3H);

**<sup>13</sup>C NMR** (100 MHz, CDCl<sub>3</sub>)  $\delta$  213.7, 198.0, 169.8, 154.9, 114.7, 110.2, 85.5, 56.9, 55.5, 47.9, 42.9, 42.1, 41.6, 38.6, 38.5, 36.4, 33.5, 29.6, 29.3, 29.2, 27.6, 26.2, 25.5, 25.2, 24.3, 23.7, 23.4, 22.9, 22.3, 21.9;

**HRMS** (ESI) calcd for C<sub>30</sub>H<sub>47</sub>O<sub>3</sub> [M+H]<sup>+</sup> Exact Mass: 455.3520; found: 455.3525.

**Table S18.** NMR data (CDCl<sub>3</sub>) comparison between synthetic **14** and the isolated natural product.

| position | <sup>1</sup> H & ppm (J)              |                                       |                     | <sup>13</sup> C & ppm |                    |                     |
|----------|---------------------------------------|---------------------------------------|---------------------|-----------------------|--------------------|---------------------|
|          | isolated (400M)                       | synthesized (400M)                    | error (iso. - syn.) | isolated (100M)       | synthesized (100M) | error (iso. - syn.) |
| 1        | -                                     | -                                     | -                   | 169.8                 | 169.8              | 0                   |
| 2        | -                                     | -                                     | -                   | 47.9                  | 47.9               | 0                   |
| 3        | -                                     | -                                     | -                   | 213.7                 | 213.7              | 0                   |
| 4        | -                                     | -                                     | -                   | 55.5                  | 55.5               | 0                   |
| 5        | -                                     | -                                     | -                   | 198.0                 | 198.0              | 0                   |
| 6        | -                                     | -                                     | -                   | 114.8                 | 114.7              | 0.1                 |
| 7        | 2.98 (m, 1H)                          | 2.98 (m, 1H)                          | 0                   | 29.3                  | 29.3               | 0                   |
| 8a       | 1.49 <sup>a</sup> (m, 1H)             | 1.49 <sup>a</sup> (m, 1H)             | 0                   | 42.1                  | 42.1               | 0                   |
| 8b       | 1.08 (m, 1H)                          | 1.08 (m, 1H)                          | 0                   |                       |                    |                     |
| 9        | 1.67 <sup>a</sup> (m, 1H)             | 1.67 <sup>a</sup> (m, 1H)             | 0                   | 27.6                  | 27.6               | 0                   |
| 10       | 0.95 (d, J = 6.2 Hz, 3H)              | 0.95 (d, J = 6.4 Hz, 3H)              | 0                   | 24.3                  | 24.3               | 0                   |
| 11       | 0.87 <sup>a</sup> (d, J = 6.2 Hz, 3H) | 0.87 <sup>a</sup> (d, J = 6.4 Hz, 3H) | 0                   | 21.9                  | 21.9               | 0                   |
| 12       | 1.35 <sup>a</sup> (s, 3H)             | 1.35 <sup>a</sup> (s, 3H)             | 0                   | 25.5                  | 25.5               | 0                   |
| 13       | 1.37 (s, 3H)                          | 1.37 (s, 3H)                          | 0                   | 26.2                  | 26.2               | 0                   |
| 14       | 1.35 <sup>a</sup> (s, 3H)             | 1.35 <sup>a</sup> (s, 3H)             | 0                   | 22.9                  | 22.9               | 0                   |
| 15       | 1.34 (s, 3H)                          | 1.35 (s, 3H)                          | -0.01               | 25.2                  | 25.2               | 0                   |
| 1'       | 1.54 <sup>a</sup> (m, 1H)             | 1.53 <sup>a</sup> (m, 1H)             | 0.01                | 56.9                  | 56.9               | 0                   |
| 2'a      | 1.44 <sup>a</sup> (m, 1H)             | 1.44 <sup>a</sup> (m, 1H)             | 0                   | 23.4                  | 23.4               | 0                   |
| 2'b      | 1.19 (m, 1H)                          | 1.19 (m, 1H)                          | 0                   |                       |                    |                     |
| 3'a      | 2.03 (m, 1H)                          | 2.03 (m, 1H)                          | 0                   | 41.6                  | 41.6               | 0                   |
| 3'b      | 1.76 (m, 1H)                          | 1.76 (m, 1H)                          | 0                   |                       |                    |                     |
| 4'       | -                                     | -                                     | -                   | 85.5                  | 85.5               | 0                   |
| 5'       | 2.10 <sup>a</sup> (m, 1H)             | 2.10 <sup>a</sup> (m, 1H)             | 0                   | 38.5                  | 38.6               | -0.1                |
| 6'a      | 1.70 <sup>a</sup> (m, 1H)             | 1.71 <sup>a</sup> (m, 1H)             | -0.01               | 29.2                  | 29.2               | 0                   |
| 6'b      | 1.51 <sup>a</sup> (m, 1H)             | 1.51 <sup>a</sup> (m, 1H)             | 0                   |                       |                    |                     |
| 7'a      | 2.35 (m, 1H)                          | 2.35 (m, 1H)                          | -                   | 36.4                  | 36.4               | 0                   |
| 7'b      | 2.12 <sup>a</sup> (m, 1H)             | 2.13 <sup>a</sup> (m, 1H)             | -0.01               |                       |                    |                     |
| 8'       | -                                     | -                                     | -                   | 154.9                 | 154.9              | 0                   |
| 9'       | 2.57 (q, J = 9.2 Hz, 1H)              | 2.57 (q, J = 9.2 Hz, 1H)              | 0                   | 42.9                  | 42.9               | 0                   |
| 10'a     | 1.73 (m, 1H)                          | 1.73 (m, 1H)                          | 0                   | 38.6                  | 38.5               | 0.1                 |
| 10'b     | 1.65 (m, 1H)                          | 1.65 (m, 1H)                          | 0                   |                       |                    |                     |
| 11'      | -                                     | -                                     | -                   | 33.5                  | 33.5               | 0                   |
| 12'      | 0.96 (s, 3H)                          | 0.96 (s, 3H)                          | 0                   | 29.6                  | 29.6               | 0                   |
| 13'      | 0.88 (s, 3H)                          | 0.88 (s, 3H)                          | 0                   | 22.3                  | 22.3               | 0                   |
| 14'      | 1.25 (s, 3H)                          | 1.25 (s, 3H)                          | 0                   | 23.7                  | 23.7               | 0                   |
| 15'a     | 4.83 (brs, 1H)                        | 4.83 (brs, 1H)                        | 0                   | 110.2                 | 110.2              | 0                   |
| 15'b     | 4.73 (brs, 1H)                        | 4.73 (brs, 1H)                        | 0                   |                       |                    |                     |

<sup>a</sup> Overlapped signals

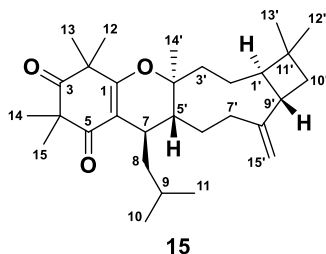

Compound **15**: 1.8 mg, 1% yield, yellow oil;

$R_f = 0.53$  (petroleum ether/ethyl acetate, 20/1);

$[\alpha]_D^{25} = -20.4^\circ$  (*c* 0.5, MeOH);

**IR** (KBr)  $\nu_{\max}$ : 2933, 2867, 1713, 1620, 1462, 1383, 1192, 1040  $\text{cm}^{-1}$ ;

**<sup>1</sup>H NMR** (400 MHz, CDCl<sub>3</sub>)  $\delta$  4.83 (s, 1H), 4.68 (s, 1H), 2.71 (q, *J* = 9.3 Hz, 1H), 2.40 (m, 1H), 2.28 (m, 1H), 2.20 (m, 1H), 2.14 (m, 1H), 2.10 (m, 1H), 1.92 (m, 1H), 1.88 (m, 1H), 1.78 (m, 1H), 1.65 (m, 1H), 1.62 (m, 1H), 1.56 (m, 1H), 1.56 (m, 1H), 1.52 (m, 2H), 1.48 (m, 1H), 1.40 (m, 1H), 1.38 (s, 3H), 1.34 (s, 3H), 1.31 (s, 3H), 1.31 (s, 3H), 1.03 (s, 3H), 1.00 (s, 3H), 0.97 (s, 3H), 0.89 (d, *J* = 6.5 Hz, 3H), 0.80 (d, *J* = 6.5 Hz, 3H);

**<sup>13</sup>C NMR** (100 MHz, CDCl<sub>3</sub>)  $\delta$  214.1, 197.6, 170.4, 155.0, 113.4, 110.3, 83.5, 55.3, 54.6, 47.7, 42.8, 40.4, 40.0, 39.4, 39.4, 36.4, 35.1, 34.5, 33.5, 29.8, 25.9, 25.7, 25.5, 24.1, 24.0, 24.0, 23.7, 22.4, 22.1, 19.9;

**HRMS** (ESI) calcd for C<sub>30</sub>H<sub>47</sub>O<sub>3</sub> [M+H]<sup>+</sup> Exact Mass: 455.3520; found: 455.3521.

**Table S19.** NMR data (CDCl<sub>3</sub>) comparison between synthetic **15** and the isolated natural product.

| position | <sup>1</sup> H & ppm (J)  |                           |                     | <sup>13</sup> C & ppm |                    |                     |
|----------|---------------------------|---------------------------|---------------------|-----------------------|--------------------|---------------------|
|          | isolated (400M)           | synthesized (400M)        | error (iso. - syn.) | isolated (100M)       | synthesized (100M) | error (iso. - syn.) |
| 1        | -                         | -                         | -                   | 170.4                 | 170.4              | 0                   |
| 2        | -                         | -                         | -                   | 47.7                  | 47.7               | 0                   |
| 3        | -                         | -                         | -                   | 214.1                 | 214.1              | 0                   |
| 4        | -                         | -                         | -                   | 55.3                  | 55.3               | 0                   |
| 5        | -                         | -                         | -                   | 197.6                 | 197.6              | 0                   |
| 6        | -                         | -                         | -                   | 113.4                 | 113.4              | 0                   |
| 7        | 2.28 (m, 1H)              | 2.28 (m, 1H)              | 0                   | 35.1                  | 35.1               | 0                   |
| 8a       | 1.88 <sup>a</sup> (m, 1H) | 1.88 <sup>a</sup> (m, 1H) | 0                   | 39.4                  | 39.4               | 0                   |
| 8b       | 1.40 <sup>a</sup> (m, 1H) | 1.40 <sup>a</sup> (m, 1H) | 0                   |                       |                    |                     |
| 9        | 1.56 <sup>a</sup> (m, 1H) | 1.56 <sup>a</sup> (m, 1H) | 0                   | 25.7                  | 25.7               | 0                   |
| 10       | 0.89 (d, J = 6.6 Hz, 3H)  | 0.89 (d, J = 6.5 Hz, 3H)  | 0                   | 24.1                  | 24.1               | 0                   |
| 11       | 0.79 (d, J = 6.6 Hz, 3H)  | 0.80 (d, J = 6.5 Hz, 3H)  | -0.01               | 24.0                  | 24.0               | 0                   |
| 12       | 1.38 (s, 3H)              | 1.38 (s, 3H)              | 0                   | 24.0                  | 24.0               | 0                   |
| 13       | 1.31 <sup>a</sup> (s, 3H) | 1.31 <sup>a</sup> (s, 3H) | 0                   | 25.5                  | 25.5               | 0                   |
| 14       | 1.34 (s, 3H)              | 1.34 (s, 3H)              | 0                   | 25.9                  | 25.9               | 0                   |
| 15       | 1.31 <sup>a</sup> (s, 3H) | 1.31 <sup>a</sup> (s, 3H) | 0                   | 23.7                  | 23.7               | 0                   |
| 1'       | 1.61 <sup>a</sup> (m, 1H) | 1.62 <sup>a</sup> (m, 1H) | -0.01               | 54.6                  | 54.6               | 0                   |
| 2'       | 1.52 <sup>a</sup> (m, 2H) | 1.52 <sup>a</sup> (m, 2H) | 0                   | 22.1                  | 22.1               | 0                   |
| 3'a      | 2.13 <sup>a</sup> (m, 1H) | 2.14 <sup>a</sup> (m, 1H) | -0.01               | 39.4                  | 39.4               | 0                   |
| 3'b      | 1.77 (m, 1H)              | 1.78 (m, 1H)              | -0.01               |                       |                    |                     |
| 4'       | -                         | -                         | -                   | 83.5                  | 83.5               | 0                   |
| 5'       | 2.09 <sup>a</sup> (m, 1H) | 2.10 <sup>a</sup> (m, 1H) | -0.01               | 40.0                  | 40.0               | 0                   |
| 6'a      | 1.65 <sup>a</sup> (m, 1H) | 1.65 <sup>a</sup> (m, 1H) | 0                   | 34.5                  | 34.5               | 0                   |
| 6'b      | 1.47 <sup>a</sup> (m, 1H) | 1.48 <sup>a</sup> (m, 1H) | -0.01               |                       |                    |                     |
| 7'a      | 2.40 (m, 1H)              | 2.40 (m, 1H)              | 0                   | 36.4                  | 36.4               | 0                   |
| 7'b      | 2.19 (m, 1H)              | 2.20 (m, 1H)              | -0.01               |                       |                    |                     |
| 8'       | -                         | -                         | -                   | 155.0                 | 155.0              | 0                   |
| 9'       | 2.71 (q, J = 9.6 Hz, 1H)  | 2.71 (q, J = 9.3 Hz, 1H)  | 0                   | 42.8                  | 42.8               | 0                   |
| 10'a     | 1.92 (m, 1H)              | 1.92 (m, 1H)              | 0                   | 40.4                  | 40.4               | 0                   |
| 10'b     | 1.56 <sup>a</sup> (m, 1H) | 1.56 <sup>a</sup> (m, 1H) | 0                   |                       |                    |                     |
| 11'      | -                         | -                         | -                   | 33.5                  | 33.5               | 0                   |
| 12'      | 1.00 (s, 3H)              | 1.00 (s, 3H)              | 0                   | 29.8                  | 29.8               | 0                   |
| 13'      | 0.97 (s, 3H)              | 0.97 (s, 3H)              | 0                   | 22.4                  | 22.4               | 0                   |
| 14'      | 1.03 (s, 3H)              | 1.03 (s, 3H)              | 0                   | 19.9                  | 19.9               | 0                   |
| 15'a     | 4.83 (s, 1H)              | 4.83 (s, 1H)              | 0                   | 110.3                 | 110.3              | 0                   |
| 15'b     | 4.68 (s, 1H)              | 4.68 (s, 1H)              | 0                   |                       |                    |                     |

<sup>a</sup> Overlapped signals**5.3 Syntheses of 1–2 and 16–17 through path A**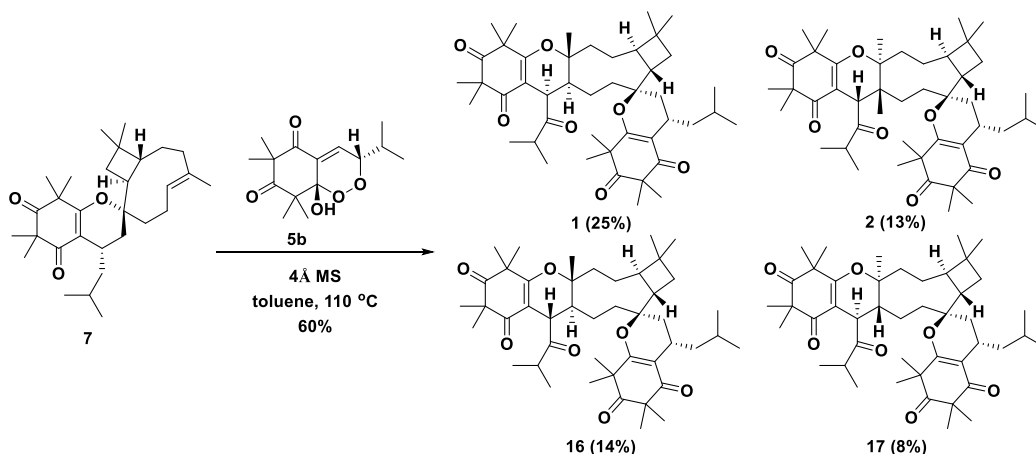

Compound **7** (50 mg, 0.11 mmol) in a toluene solution (4 mL) was added **5b** (47 mg, 0.16 mmol) and 4Å molecular sieves under reflux at 110 °C. The resulting mixture was stirred for 24 h. After the reaction was finished according to TLC, the reaction was filtered through a plug of celite (CH<sub>2</sub>Cl<sub>2</sub> was used as the eluent) and was concentrated *in vacuo*. The crude residue was further purified by preparative HPLC (CH<sub>3</sub>OH-H<sub>2</sub>O, 92:8) to afford corresponding products **1–2** and **16–17**.

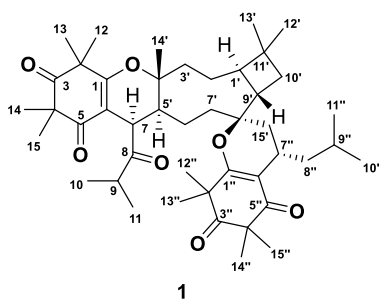

Compound **1**: 19.7 mg, 25% yield, yellow oil;

$R_f = 0.69$  (petroleum ether/ethyl acetate, 4/1);

$[\alpha]_D^{25} = +117.1^\circ$  ( $c$  1.0, MeOH);

**IR** (KBr)  $\nu_{\max}$ : 2954, 2925, 2868, 2850, 1713, 1652, 1618, 1466, 1383, 1362, 1212, 1182, 770  $\text{cm}^{-1}$ ;

**ECD** ( $\text{CH}_3\text{OH}$ ):  $\lambda_{\max}(\Delta\epsilon)$  207 ( $-14.9$ ), 273 ( $+60.0$ ) nm;

**$^1\text{H}$  NMR** (400 MHz,  $\text{CDCl}_3$ )  $\delta$  4.08 (d,  $J = 7.2$  Hz, 1H), 2.90 (m, 1H), 2.84 (m, 1H), 2.38 (m, 1H), 2.18 (m, 1H), 2.16 (m, 1H), 2.15 (m, 1H), 2.11 (m, 1H), 1.92 (m, 1H), 1.88 (m, 1H), 1.82 (m, 1H), 1.78 (m, 1H), 1.73 (m, 1H), 1.71 (m, 1H), 1.68 (m, 1H), 1.64 (m, 1H), 1.62 (m, 1H), 1.55 (m, 1H), 1.48 (m, 1H), 1.43 (s, 3H), 1.40 (m, 1H), 1.37 (s, 3H), 1.36 (s, 3H), 1.35 (s, 3H), 1.33 (s, 3H), 1.32 (s, 3H), 1.31 (s, 3H), 1.30 (s, 3H), 1.26 (s, 3H), 1.25 (d,  $J = 6.6$  Hz, 3H), 1.07 (d,  $J = 6.6$  Hz, 3H), 1.03 (m, 1H), 0.98 (d,  $J = 6.6$  Hz, 3H), 0.97 (s, 3H), 0.94 (s, 3H), 0.92 (d,  $J = 6.6$  Hz, 3H);

**$^{13}\text{C}$  NMR** (100 MHz,  $\text{CDCl}_3$ )  $\delta$  216.0, 213.1, 213.0, 198.0, 197.2, 171.4, 168.8, 112.5, 108.3, 84.3, 83.3, 55.5, 55.4, 48.7, 48.2, 48.0, 45.2, 44.8, 43.6, 43.2, 42.9, 40.8, 39.5, 35.7, 34.1, 33.8, 30.1, 26.7, 26.1, 26.0, 25.9, 25.6, 25.5, 24.9, 24.4, 24.1, 23.4, 22.9, 22.4, 21.9, 21.5, 21.2, 21.0, 20.4, 18.3;

**HRMS** (ESI) calcd for  $\text{C}_{45}\text{H}_{67}\text{O}_7$   $[\text{M}+\text{H}]^+$  Exact Mass: 719.4881; found: 719.4884.

**Table S20.** NMR data (CDCl<sub>3</sub>) comparison between synthetic **1** through path A and the isolated natural product.

| position | <sup>1</sup> H & ppm (J) |                          |                     | <sup>13</sup> C & ppm |                    |                     |
|----------|--------------------------|--------------------------|---------------------|-----------------------|--------------------|---------------------|
|          | isolated (300M)          | synthesized (400M)       | error (iso. - syn.) | isolated (75M)        | synthesized (100M) | error (iso. - syn.) |
| 1        | -                        | -                        | -                   | 171.3                 | 171.4              | -0.1                |
| 2        | -                        | -                        | -                   | 48.0                  | 48.0               | 0                   |
| 3        | -                        | -                        | -                   | 213.1                 | 213.1              | 0                   |
| 4        | -                        | -                        | -                   | 55.5                  | 55.5               | 0                   |
| 5        | -                        | -                        | -                   | 197.2                 | 197.2              | 0                   |
| 6        | -                        | -                        | -                   | 108.4                 | 108.3              | 0.1                 |
| 7        | 4.07 (d, J = 7.2 Hz, 1H) | 4.08 (d, J = 7.2 Hz, 1H) | -0.01               | 45.2                  | 45.2               | 0                   |
| 8        | -                        | -                        | -                   | 216.0                 | 216.0              | 0                   |
| 9        | 2.89 (m, 1H)             | 2.90 (m, 1H)             | -0.01               | 42.9                  | 42.9               | 0                   |
| 10       | 1.24 (d, J = 6.8 Hz, 3H) | 1.25 (d, J = 6.6 Hz, 3H) | -0.01               | 20.4                  | 20.4               | 0                   |
| 11       | 1.07 (d, J = 6.8 Hz, 3H) | 1.07 (d, J = 6.6 Hz, 3H) | 0                   | 18.3                  | 18.3               | 0                   |
| 12       | 1.37 (s, 3H)             | 1.37 (s, 3H)             | 0                   | 24.5                  | 24.4               | 0.1                 |
| 13       | 1.42 (s, 3H)             | 1.43 (s, 3H)             | -0.01               | 25.6                  | 25.5               | 0.1                 |
| 14       | 1.34 (s, 3H)             | 1.35 (s, 3H)             | -0.01               | 26.7                  | 26.7               | 0                   |
| 15       | 1.29 (s, 3H)             | 1.30 (s, 3H)             | -0.01               | 26.0                  | 26.0               | 0                   |
| 1'       | 1.82 (m, 1H)             | 1.82 (m, 1H)             | 0                   | 48.7                  | 48.7               | 0                   |
| 2'a      | 1.70 (m, 1H)             | 1.71 (m, 1H)             | -0.01               | 23.4                  | 23.4               | 0                   |
| 2'b      | 1.40 (m, 1H)             | 1.40 (m, 1H)             | 0                   | -                     | -                  | -                   |
| 3'a      | 2.18 (m, 1H)             | 2.18 (m, 1H)             | 0                   | 40.8                  | 40.8               | 0                   |
| 3'b      | 1.73 (m, 1H)             | 1.73 (m, 1H)             | 0                   | -                     | -                  | -                   |
| 4'       | -                        | -                        | -                   | 84.3                  | 84.3               | 0                   |
| 5'       | 2.15 (m, 1H)             | 2.15 (m, 1H)             | 0                   | 43.2                  | 43.2               | 0                   |
| 6'a      | 1.87 (m, 1H)             | 1.88 (m, 1H)             | -0.01               | 21.5                  | 21.5               | 0                   |
| 6'b      | 1.78 (m, 1H)             | 1.78 (m, 1H)             | 0                   | -                     | -                  | -                   |
| 7'a      | 2.11 (m, 1H)             | 2.11 (m, 1H)             | 0                   | 39.5                  | 39.5               | 0                   |
| 7'b      | 1.91 (m, 1H)             | 1.92 (m, 1H)             | -0.01               | -                     | -                  | -                   |
| 8'       | -                        | -                        | -                   | 83.3                  | 83.3               | 0                   |
| 9'       | 2.38 (m, 1H)             | 2.38 (m, 1H)             | 0                   | 44.8                  | 44.8               | 0                   |
| 10'a     | 1.63 (m, 1H)             | 1.62 (m, 1H)             | 0.01                | 35.7                  | 35.7               | 0                   |
| 10'b     | 1.48 (m, 1H)             | 1.48 (m, 1H)             | 0                   | -                     | -                  | -                   |
| 11'      | -                        | -                        | -                   | 34.1                  | 34.1               | 0                   |
| 12'      | 0.94 (s, 3H)             | 0.94 (s, 3H)             | 0                   | 22.4                  | 22.4               | 0                   |
| 13'      | 0.97 (s, 3H)             | 0.97 (s, 3H)             | 0                   | 30.1                  | 30.1               | 0                   |
| 14'      | 1.26 (s, 3H)             | 1.26 (s, 3H)             | 0                   | 21.0                  | 21.0               | 0                   |
| 15'a     | 2.16 (m, 1H)             | 2.16 (m, 1H)             | 0                   | 33.8                  | 33.8               | 0                   |
| 15'b     | 1.55 (m, 1H)             | 1.55 (m, 1H)             | 0                   | -                     | -                  | -                   |
| 1''      | -                        | -                        | -                   | 168.8                 | 168.8              | 0                   |
| 2''      | -                        | -                        | -                   | 48.2                  | 48.2               | 0                   |
| 3''      | -                        | -                        | -                   | 213.0                 | 213.1              | -0.1                |
| 4''      | -                        | -                        | -                   | 55.4                  | 55.4               | 0                   |
| 5''      | -                        | -                        | -                   | 198.0                 | 198.0              | 0                   |
| 6''      | -                        | -                        | -                   | 112.6                 | 112.5              | 0.1                 |
| 7''      | 2.85 (m, 1H)             | 2.84 (m, 1H)             | 0.01                | 25.6                  | 25.6               | 0                   |
| 8''a     | 1.64 (m, 1H)             | 1.64 (m, 1H)             | 0                   | 43.7                  | 43.6               | 0.1                 |
| 8''b     | 1.03 (m, 1H)             | 1.03 (m, 1H)             | 0                   | -                     | -                  | -                   |
| 9''      | 1.69 (m, 1H)             | 1.68 (m, 1H)             | 0.01                | 25.9                  | 25.9               | 0                   |
| 10''     | 0.92 (d, J = 6.0 Hz, 3H) | 0.92 (d, J = 6.6 Hz, 3H) | 0                   | 24.1                  | 24.1               | 0                   |
| 11''     | 0.98 (d, J = 6.0 Hz, 3H) | 0.98 (d, J = 6.6 Hz, 3H) | 0                   | 21.3                  | 21.2               | 0.1                 |
| 12''     | 1.36 (s, 3H)             | 1.36 (s, 3H)             | 0                   | 24.9                  | 24.9               | 0                   |
| 13''     | 1.31 (s, 3H)             | 1.31 (s, 3H)             | 0                   | 21.9                  | 21.9               | 0                   |
| 14''     | 1.31 (s, 3H)             | 1.32 (s, 3H)             | -0.01               | 22.9                  | 22.9               | 0                   |
| 15''     | 1.32 (s, 3H)             | 1.33 (s, 3H)             | -0.01               | 26.0                  | 26.1               | -0.1                |

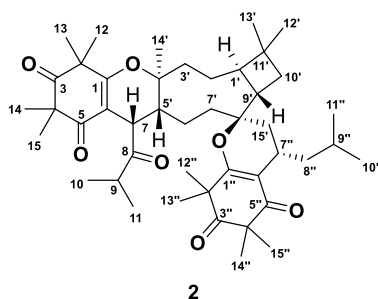

Compound **2**: 10.3 mg, 13% yield, yellow oil;

$R_f$  = 0.69 (petroleum ether/ethyl acetate, 4/1);

$[\alpha]_D^{25} = -33.2^\circ$  (c 1.0, MeOH);

**IR** (KBr)  $\nu_{\max}$ : 2925, 2858, 1699, 1622, 1462, 1383, 1204, 1142, 804, 769, 720  $\text{cm}^{-1}$ ;

**ECD** (CH<sub>3</sub>OH):  $\lambda_{\max}$  ( $\Delta\epsilon$ ) 208 (+30.1), 251 (-30.4), 274 (+10.8), 304 (-15.0) nm;

**<sup>1</sup>H NMR** (300 MHz, CDCl<sub>3</sub>) δ 4.23 (d, *J* = 7.5 Hz, 1H), 2.95 (m, 1H), 2.70 (m, 1H), 2.58 (m, 1H), 2.28 (m, 1H), 2.20 (m, 1H), 2.11 (m, 1H), 1.97 (m, 1H), 1.88 (m, 1H), 1.74 (m, 1H), 1.73 (m, 1H), 1.72 (m, 1H), 1.70 (m, 1H), 1.60 (m, 1H), 1.53 (m, 1H), 1.49 (m, 1H), 1.44 (s, 3H), 1.39 (s, 3H), 1.38 (m, 1H), 1.37 (s, 3H), 1.36 (s, 3H), 1.36 (s, 3H), 1.33 (s, 3H), 1.32 (d, *J* = 6.6 Hz, 3H), 1.31 (s, 3H), 1.30 (s, 3H), 1.28 (m, 1H), 1.26 (m, 2H), 1.14 (m, 3H), 1.10 (m, 1H), 1.03 (d, *J* = 6.6 Hz, 3H), 1.03 (d, *J* = 6.6 Hz, 3H), 0.97 (s, 3H), 0.95 (s, 3H), 0.91 (d, *J* = 6.6 Hz, 3H);

**<sup>13</sup>C NMR** (75 MHz, CDCl<sub>3</sub>) δ 216.3, 213.3, 212.9, 197.9, 197.4, 171.7, 169.8, 110.7, 107.9, 83.4, 82.8, 55.5, 55.5, 48.6, 48.1, 48.0, 47.5, 42.7, 42.6, 42.5, 40.7, 40.6, 36.7, 34.6, 34.0, 29.9, 29.3, 27.3, 26.5, 26.1, 25.5, 25.5, 25.3, 25.2, 24.9, 24.1, 23.6, 23.0, 22.9, 22.7, 21.3, 21.3, 21.0, 20.8, 17.4;

**HRMS** (ESI) calcd for C<sub>45</sub>H<sub>67</sub>O<sub>7</sub> [M+H]<sup>+</sup> Exact Mass: 719.4881; found: 719.4880.

**Table S21.** NMR data (CDCl<sub>3</sub>) comparison between synthetic **2** from through A and the isolated natural product.

| position | <sup>1</sup> H & ppm ( <i>J</i> ) |                                 |                     | <sup>13</sup> C & ppm |                   |                     |
|----------|-----------------------------------|---------------------------------|---------------------|-----------------------|-------------------|---------------------|
|          | isolated (500M)                   | synthesized (300M)              | error (iso. - syn.) | isolated (125M)       | synthesized (75M) | error (iso. - syn.) |
| 1        | -                                 | -                               | -                   | 171.7                 | 171.7             | 0                   |
| 2        | -                                 | -                               | -                   | 48.0                  | 48.0              | 0                   |
| 3        | -                                 | -                               | -                   | 212.9                 | 212.9             | 0                   |
| 4        | -                                 | -                               | -                   | 55.5                  | 55.5              | 0                   |
| 5        | -                                 | -                               | -                   | 197.4                 | 197.4             | 0                   |
| 6        | -                                 | -                               | -                   | 107.9                 | 107.9             | 0                   |
| 7        | 4.22 (d, <i>J</i> = 7.0 Hz, 1H)   | 4.23 (d, <i>J</i> = 7.5 Hz, 1H) | -0.01               | 42.6                  | 42.6              | 0                   |
| 8        | -                                 | -                               | -                   | 216.3                 | 216.3             | 0                   |
| 9        | 2.71 (m, 1H)                      | 2.70 (m, 1H)                    | 0.01                | 42.7                  | 42.7              | 0                   |
| 10       | 1.32 (d, <i>J</i> = 6.5 Hz, 3H)   | 1.32 (d, <i>J</i> = 6.6 Hz, 3H) | 0                   | 21.3                  | 21.3              | 0                   |
| 11       | 1.03 (d, <i>J</i> = 6.5 Hz, 3H)   | 1.03 (d, <i>J</i> = 6.6 Hz, 3H) | 0                   | 17.4                  | 17.4              | 0                   |
| 12       | 1.37 (s, 3H)                      | 1.37 (s, 3H)                    | 0                   | 25.2                  | 25.2              | 0                   |
| 13       | 1.44 (s, 3H)                      | 1.44 (s, 3H)                    | 0                   | 25.5                  | 25.5              | 0                   |
| 14       | 1.36 (s, 3H)                      | 1.36 (s, 3H)                    | 0                   | 27.3                  | 27.3              | 0                   |
| 15       | 1.31 (s, 3H)                      | 1.31 (s, 3H)                    | 0                   | 20.8                  | 20.8              | 0                   |
| 1'       | 1.74 (m, 1H)                      | 1.74 (m, 1H)                    | 0                   | 48.6                  | 48.6              | 0                   |
| 2'a      | 1.53 (m, 1H)                      | 1.53 (m, 1H)                    | 0                   | 23.0                  | 23.0              | 0                   |
| 2'b      | 1.25 (m, 1H)                      | 1.26 (m, 1H)                    | -0.01               | -                     | -                 | -                   |
| 3'a      | 2.11 (m, 1H)                      | 2.11 (m, 1H)                    | 0                   | 40.7                  | 40.7              | 0                   |
| 3'b      | 1.73 (m, 1H)                      | 1.73 (m, 1H)                    | 0                   | -                     | -                 | -                   |
| 4'       | -                                 | -                               | -                   | 83.4                  | 83.4              | 0                   |
| 5'       | 2.21 (m, 1H)                      | 2.20 (m, 1H)                    | 0.01                | 40.6                  | 40.6              | 0                   |
| 6'a      | 1.28 (m, 1H)                      | 1.28 (m, 1H)                    | 0                   | 29.9                  | 29.9              | 0                   |
| 6'b      | 1.25 (m, 1H)                      | 1.26 (m, 1H)                    | -0.01               | -                     | -                 | -                   |
| 7'a      | 2.27 (m, 1H)                      | 2.28 (m, 1H)                    | -0.01               | 36.7                  | 36.7              | 0                   |
| 7'b      | 1.72 (m, 1H)                      | 1.72 (m, 1H)                    | 0                   | -                     | -                 | -                   |
| 8'       | -                                 | -                               | -                   | 82.8                  | 82.8              | 0                   |
| 9'       | 2.58 (m, 1H)                      | 2.58 (m, 1H)                    | 0                   | 47.5                  | 47.5              | 0                   |
| 10'a     | 1.60 (m, 1H)                      | 1.60 (m, 1H)                    | 0                   | 34.6                  | 34.6              | 0                   |
| 10'b     | 1.39 (m, 1H)                      | 1.38 (m, 1H)                    | 0.01                | -                     | -                 | -                   |
| 11'      | -                                 | -                               | -                   | 34.0                  | 34.0              | 0                   |
| 12'      | 0.95 (s, 3H)                      | 0.95 (s, 3H)                    | 0                   | 22.9                  | 22.9              | 0                   |
| 13'      | 0.97 (s, 3H)                      | 0.97 (s, 3H)                    | 0                   | 29.3                  | 29.3              | 0                   |
| 14'      | 1.14 (s, 3H)                      | 1.14 (s, 3H)                    | 0                   | 21.0                  | 21.0              | 0                   |
| 15'a     | 1.98 (m, 1H)                      | 1.97 (m, 1H)                    | 0.01                | 23.6                  | 23.6              | 0                   |
| 15'b     | 1.89 (m, 1H)                      | 1.88 (m, 1H)                    | 0.01                | -                     | -                 | -                   |
| 1''      | -                                 | -                               | -                   | 169.8                 | 169.8             | 0                   |
| 2''      | -                                 | -                               | -                   | 48.1                  | 48.1              | 0                   |
| 3''      | -                                 | -                               | -                   | 213.3                 | 213.3             | 0                   |
| 4''      | -                                 | -                               | -                   | 55.5                  | 55.5              | 0                   |
| 5''      | -                                 | -                               | -                   | 197.9                 | 197.9             | 0                   |
| 6''      | -                                 | -                               | -                   | 110.7                 | 110.7             | 0                   |
| 7''      | 2.95 (m, 1H)                      | 2.95 (m, 1H)                    | 0                   | 25.3                  | 25.3              | 0                   |
| 8''a     | 1.49 (m, 1H)                      | 1.49 (m, 1H)                    | 0                   | 42.5                  | 42.5              | 0                   |
| 8''b     | 1.10 (m, 1H)                      | 1.10 (m, 1H)                    | 0                   | -                     | -                 | -                   |
| 9''      | 1.70 (m, 1H)                      | 1.70 (m, 1H)                    | 0                   | 26.1                  | 26.1              | 0                   |
| 10''     | 0.91 (d, <i>J</i> = 6.2 Hz, 3H)   | 0.91 (d, <i>J</i> = 6.6 Hz, 3H) | 0                   | 24.1                  | 24.1              | 0                   |
| 11''     | 1.03 (d, <i>J</i> = 6.2 Hz, 3H)   | 1.03 (d, <i>J</i> = 6.6 Hz, 3H) | 0                   | 21.3                  | 21.3              | 0                   |
| 12''     | 1.39 (s, 3H)                      | 1.39 (s, 3H)                    | 0                   | 24.9                  | 24.9              | 0                   |
| 13''     | 1.30 (s, 3H)                      | 1.30 (s, 3H)                    | 0                   | 25.5                  | 25.5              | 0                   |
| 14''     | 1.33 (s, 3H)                      | 1.33 (s, 3H)                    | 0                   | 22.7                  | 22.7              | 0                   |
| 15''     | 1.36 (s, 3H)                      | 1.36 (s, 3H)                    | 0                   | 26.5                  | 26.5              | 0                   |

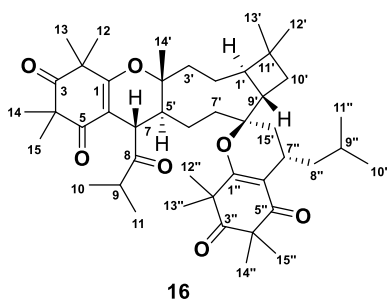

Compound **16**: 11.0 mg, 14% yield, yellow blocks, mp 213–215 °C;

$R_f = 0.62$  (petroleum ether/ethyl acetate, 4/1);

$[\alpha]_D^{25} = +49.4^\circ$  ( $c$  0.5, MeOH);

**IR** (KBr)  $\nu_{\max}$ : 2923, 2857, 1707, 1659, 1616, 1459, 1378, 1201  $\text{cm}^{-1}$ ;

**$^1\text{H}$  NMR** (400 MHz,  $\text{CDCl}_3$ )  $\delta$  3.39 (d,  $J = 11.2$  Hz, 1H), 2.93 (m, 1H), 2.64 (m, 1H), 2.23 (m, 1H), 2.19 (m, 1H), 2.10 (m, 1H), 2.08 (m, 1H), 2.02 (m, 1H), 1.88 (m, 1H), 1.85 (m, 1H), 1.78 (m, 1H), 1.76 (m, 1H), 1.69 (m, 1H), 1.66 (m, 1H), 1.64 (m, 1H), 1.52 (m, 1H), 1.45 (s, 3H), 1.40 (s, 3H), 1.38 (m, 1H), 1.35 (s, 3H), 1.35 (s, 3H), 1.34 (s, 3H), 1.31 (s, 3H), 1.28 (s, 3H), 1.28 (s, 3H), 1.26 (d,  $J = 7.0$  Hz, 3H), 1.25 (m, 2H), 1.21 (m, 1H), 1.16 (s, 3H), 1.13 (d,  $J = 7.0$  Hz, 3H), 0.99 (s, 3H), 0.92 (s, 3H), 0.92 (d,  $J = 5.8$  Hz, 3H), 0.87 (d,  $J = 5.8$  Hz, 3H), 0.80 (m, 1H);

**$^{13}\text{C}$  NMR** (100 MHz,  $\text{CDCl}_3$ )  $\delta$  216.5, 212.9, 212.8, 198.5, 197.4, 171.9, 167.4, 114.0, 110.1, 83.3, 83.1, 55.2, 55.1, 49.2, 49.1, 48.5, 48.0, 43.8, 42.8, 42.6, 41.3, 38.8, 38.3, 36.2, 35.7, 33.8, 30.0, 29.9, 26.7, 26.2, 25.9, 25.6, 25.5, 24.9, 24.8, 24.2, 23.9, 23.4, 22.6, 21.7, 21.4, 20.9, 20.7, 20.0, 19.2;

**HRMS** (ESI) calcd for  $\text{C}_{45}\text{H}_{67}\text{O}_7$   $[\text{M}+\text{H}]^+$  Exact Mass: 719.4881; found: 719.4879.

**Table S22.**  $^1\text{H}$  (400 MHz) and  $^{13}\text{C}$  (100 MHz) NMR spectral data of **16** in  $\text{CDCl}_3$  ( $\delta$  in ppm,  $J$  in Hz).

| position | $\delta_{\text{H}}$ | $\delta_{\text{C}}$ | position | $\delta_{\text{H}}$ | $\delta_{\text{C}}$ |
|----------|---------------------|---------------------|----------|---------------------|---------------------|
| 1        | –                   | 171.9               | 8'       | –                   | 83.1                |
| 2        | –                   | 48.0                | 9'       | 2.10 m              | 42.6                |
| 3        | –                   | 212.9               | 10'a     | 1.76 m              | 36.2                |
| 4        | –                   | 55.1                | 10'b     | 1.38 m              |                     |
| 5        | –                   | 197.4               | 11'      | –                   | 33.8                |
| 6        | –                   | 110.1               | 12'      | 0.92 s              | 21.7                |
| 7        | 3.39 d (11.2)       | 49.2                | 13'      | 0.99 s              | 30.0                |
| 8        | –                   | 216.5               | 14'      | 1.16 s              | 20.0                |
| 9        | 2.93 m              | 41.3                | 15'a     | 2.08 m              | 38.3                |
| 10       | 1.26 d (7.0)        | 20.7                | 15'b     | 1.21 m              |                     |
| 11       | 1.13 d (7.0)        | 19.2                | 1''      | –                   | 167.4               |
| 12       | 1.35 s              | 25.6                | 2''      | –                   | 48.5                |
| 13       | 1.45 s              | 24.8                | 3''      | –                   | 212.8               |
| 14       | 1.31 s              | 22.6                | 4''      | –                   | 55.2                |
| 15       | 1.28 s              | 23.9                | 5''      | –                   | 198.5               |
| 1'       | 2.02 m              | 49.1                | 6''      | –                   | 114.0               |
| 2'       | 1.25 m              | 29.9                | 7''      | 2.64 m              | 25.9                |
|          |                     |                     | 8''a     | 1.69 m              | 42.8                |
| 3'a      | 2.19 m              | 35.7                | 8''b     | 0.80 m              |                     |
| 3'b      | 1.85 m              |                     | 9''      | 1.64 m              | 25.5                |



|     |        |      |     |              |      |
|-----|--------|------|-----|--------------|------|
| 4'  | –      | 83.3 | 10" | 0.87 d (5.8) | 24.2 |
| 5'  | 2.23 m | 43.8 | 11" | 0.92 d (5.8) | 20.9 |
| 6'a | 1.78 m | 21.4 | 12" | 1.35 s       | 26.7 |
| 6'b | 1.52 m |      | 13" | 1.40 s       | 23.4 |
| 7'a | 1.88 m | 38.8 | 14" | 1.28 s       | 26.2 |
| 7'b | 1.66 m |      | 15" | 1.34 s       | 24.9 |

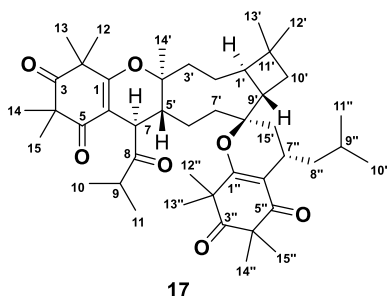

Compound **17**: 6.3 mg, 8% yield, yellow oil;

$R_f = 0.62$  (petroleum ether/ethyl acetate, 4/1);

$[\alpha]_D^{25} = +29.2^\circ$  (*c* 0.5, MeOH);

**IR** (KBr)  $\nu_{\max}$ : 2925, 2857, 1712, 1659, 1621, 1464, 1383, 1354  $\text{cm}^{-1}$ ;

**$^1\text{H}$  NMR** (400 MHz,  $\text{CDCl}_3$ )  $\delta$  3.45 (d,  $J = 10.4$  Hz, 1H), 2.86 (m, 1H), 2.73 (m, 1H), 2.47 (m, 1H), 2.16 (m, 1H), 2.04 (m, 1H), 2.01 (m, 1H), 1.86 (m, 2H), 1.73 (m, 1H), 1.72 (m, 1H), 1.70 (m, 1H), 1.67 (m, 1H), 1.57 (m, 1H), 1.53 (m, 2H), 1.48 (m, 1H), 1.45 (s, 3H), 1.43 (d,  $J = 6.8$  Hz, 3H), 1.37 (m, 1H), 1.32 (s, 3H), 1.32 (s, 3H), 1.32 (s, 3H), 1.30 (s, 3H), 1.30 (m, 1H), 1.29 (s, 3H), 1.28 (s, 3H), 1.24 (s, 3H), 1.18 (m, 1H), 1.09 (d,  $J = 6.8$  Hz, 3H), 1.07 (s, 3H), 1.06 (d,  $J = 6.8$  Hz, 3H), 1.03 (m, 1H), 0.98 (s, 3H), 0.96 (s, 3H), 0.96 (d,  $J = 6.8$  Hz, 3H);

**$^{13}\text{C}$  NMR** (100 MHz,  $\text{CDCl}_3$ )  $\delta$  216.2, 213.3, 212.8, 197.9, 197.0, 171.2, 169.7, 110.3, 109.7, 82.8, 82.2, 55.7, 55.5, 48.5, 47.9, 47.8, 47.3, 46.9, 43.8, 42.1, 41.6, 38.3, 37.5, 34.6, 33.7, 29.5, 26.9, 26.3, 25.5, 25.5, 25.4, 25.2, 24.9, 24.7, 24.3, 24.0, 22.9, 22.5, 22.1, 21.9, 21.4, 21.4, 20.5, 20.0, 17.8;

**HRMS** (ESI) calcd for  $\text{C}_{45}\text{H}_{67}\text{O}_7$   $[\text{M}+\text{H}]^+$  Exact Mass: 719.4881; found: 719.4881.

**Table S23.**  $^1\text{H}$  (400 MHz) and  $^{13}\text{C}$  (100 MHz) NMR spectral data of **17** in  $\text{CDCl}_3$  ( $\delta$  in ppm,  $J$  in Hz).

| position | $\delta_{\text{H}}$ | $\delta_{\text{C}}$ | position | $\delta_{\text{H}}$ | $\delta_{\text{C}}$ |
|----------|---------------------|---------------------|----------|---------------------|---------------------|
| 1        | –                   | 171.2               | 8'       | –                   | 82.2                |
| 2        | –                   | 47.8                | 9'       | 2.47 m              | 46.9                |
| 3        | –                   | 212.8               | 10'a     | 1.57 m              | 34.6                |
| 4        | –                   | 55.7                | 10'b     | 1.30 m              |                     |
| 5        | –                   | 197.0               | 11'      | –                   | 33.7                |
| 6        | –                   | 109.7               | 12'      | 0.98 s              | 22.9                |
| 7        | 3.45 d (10.4)       | 47.3                | 13'      | 0.96 s              | 29.5                |
| 8        | –                   | 216.2               | 14'      | 1.07 s              | 21.4                |
| 9        | 2.73 m              | 43.8                | 15'      | 1.86 m              | 24.0                |
| 10       | 1.43 d (6.8)        | 20.5                |          |                     |                     |
| 11       | 1.09 d (6.8)        | 17.8                | 1"       | –                   | 169.7               |
| 12       | 1.32 s              | 21.4                | 2"       | –                   | 47.9                |
| 13       | 1.45 s              | 24.7                | 3"       | –                   | 213.3               |

|     |        |      |     |              |       |
|-----|--------|------|-----|--------------|-------|
| 14  | 1.29 s | 22.1 | 4"  | –            | 55.5  |
| 15  | 1.32 s | 22.5 | 5"  | –            | 197.9 |
| 1'  | 1.72 m | 48.5 | 6"  | –            | 110.3 |
| 2'  | 1.53 m | 21.9 | 7"  | 2.86 m       | 25.2  |
|     |        |      | 8"a | 1.48 m       | 42.1  |
| 3'a | 2.16 m | 38.3 | 8"b | 1.03 m       |       |
| 3'b | 1.67 m |      | 9"  | 1.73 m       | 26.3  |
| 4'  | –      | 82.8 | 10" | 0.96 d (6.8) | 24.3  |
| 5'  | 2.01 m | 41.6 | 11" | 1.06 d (6.8) | 20.0  |
| 6'a | 1.70 m | 25.5 | 12" | 1.24 s       | 24.9  |
| 6'b | 1.37 m |      | 13" | 1.28 s       | 25.4  |
| 7'a | 2.04 m | 37.5 | 14" | 1.30 s       | 25.5  |
| 7'b | 1.18 m |      | 15" | 1.32 s       | 26.9  |

#### 5.4 Syntheses of 8–11 and 18–21

**Table S24.** Condition screen for the syntheses of compounds **8–11** and **18–21**.

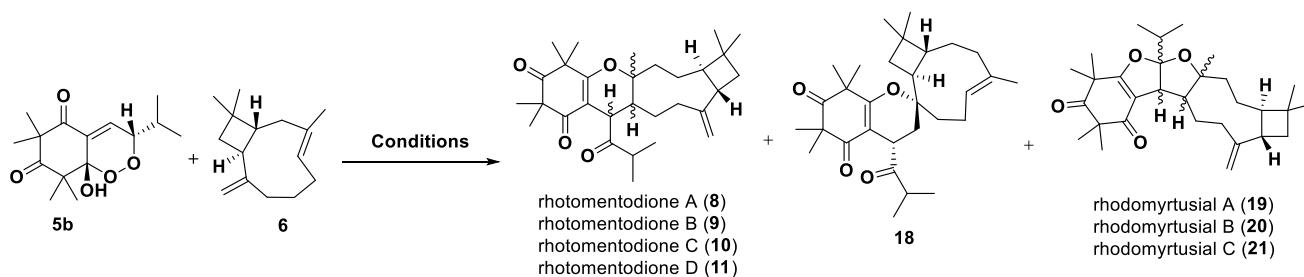

| entry <sup>a</sup> | catalyst                                          | mol % | solvent | temp (°C) | time (h) | Yield (%) <sup>b</sup> |
|--------------------|---------------------------------------------------|-------|---------|-----------|----------|------------------------|
| 1                  | –                                                 | –     | DCM     | 40        | 48       | trace <sup>d</sup>     |
| 2                  | –                                                 | –     | DCM     | 40        | 48       | 45                     |
| 3                  | TFA                                               | 20    | DCM     | 40        | 24       | trace                  |
| 4                  | –                                                 | –     | THF     | 60        | 48       | trace                  |
| 5                  | –                                                 | –     | toluene | 60        | 48       | 60                     |
| 6                  | –                                                 | –     | toluene | 60        | 48       | 10 <sup>d</sup>        |
| 7                  | TFA                                               | 20    | toluene | 60        | 24       | trace                  |
| 8                  | –                                                 | –     | toluene | 110       | 48       | 48                     |
| 9                  | –                                                 | –     | toluene | 110       | 48       | trace <sup>c</sup>     |
| 10                 | Sc(CF <sub>3</sub> SO <sub>3</sub> ) <sub>3</sub> | 20    | toluene | 110       | 24       | trace                  |
| 11                 | Quinine                                           | 50    | toluene | rt        | 48       | 25                     |
| 12                 | Quinine                                           | 50    | toluene | 110       | 48       | 30                     |
| 13                 | ( <i>S</i> )- <b>C1</b> <sup>e</sup>              | 20    | toluene | 110       | 48       | 58                     |
| 14                 | ( <i>S</i> )- <b>C1</b>                           | 20    | toluene | 110       | 48       | 50 <sup>d</sup>        |

<sup>a</sup> Unless otherwise stated, the reactions of entries 1–14 were performed with **5b** (0.35 mmol), **6** (0.24 mmol) and 4Å MS (30 mg). <sup>b</sup> Combined isolated yield. <sup>c</sup> Without 4Å MS. <sup>d</sup> **5a** was added. <sup>e</sup> (*S*)-**C1** was (1*S*)-3,7-bis[3,5-bis(trifluoromethyl)phenyl]-10,11,12,13-tetrahydro-5-hydroxy-5-oxide-diindeno[7,1-de:1',7'-fg][1,3,2]dioxaphosphocin.

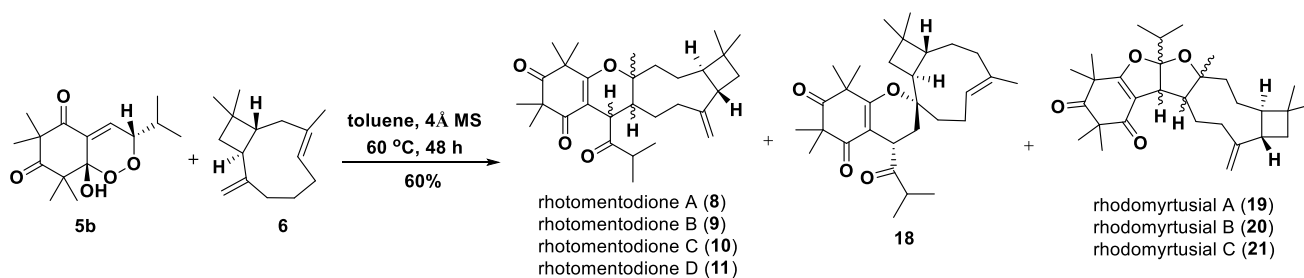

Compound **5b** (100 mg, 0.35 mmol) in a toluene solution (4 mL) was added  $\beta$ -caryophyllene (**6**) (53.5  $\mu$ L, 0.24 mmol) and 4Å molecular sieves (30 mg) at 60 °C (entry 5). The resulting mixture was stirred for 48 h. After the reaction was finished according to TLC, the reaction was filtered through a plug of celite (CH<sub>2</sub>Cl<sub>2</sub> was used as the eluent) and was concentrated *in vacuo*. The crude residue was further purified by preparative HPLC (CH<sub>3</sub>CN-H<sub>2</sub>O, 94:6) to afford corresponding products **8–11** and **18–21**.

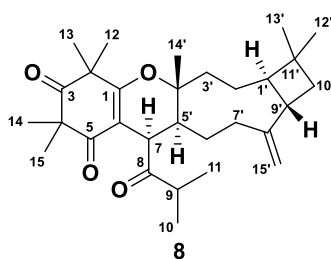

Compound **8**: 16.6 mg, 15% yield, yellow oil;

$R_f$  = 0.35 (petroleum ether/ethyl acetate, 20/1);

$[\alpha]_D^{25}$  = +110.4° (*c* 1.0, MeOH);

**IR** (KBr)  $\nu_{\max}$ : 2938, 2868, 1709, 1625, 1462, 1380, 1358, 1187, 1105, 1053, 890, 759 cm<sup>-1</sup>;

**<sup>1</sup>H NMR** (400 MHz, CDCl<sub>3</sub>)  $\delta$  4.99 (s, 2H), 4.05 (d, *J* = 6.6 Hz, 1H), 2.88 (sept, *J* = 6.9 Hz, 1H), 2.50 (m, 1H), 2.42 (m, 1H), 2.24 (m, 1H), 2.12 (m, 1H), 2.08 (m, 1H), 1.78 (m, 1H), 1.75 (m, 1H), 1.68 (m, 1H), 1.63 (m, 1H), 1.61 (m, 1H), 1.59 (m, 1H), 1.57 (m, 1H), 1.43 (s, 3H), 1.40 (m, 1H), 1.36 (s, 3H), 1.31 (s, 3H), 1.30 (s, 3H), 1.30 (s, 3H), 1.21 (d, *J* = 6.7 Hz, 3H), 1.07 (d, *J* = 6.7 Hz, 3H), 0.98 (s, 3H), 0.96 (s, 3H);

**<sup>13</sup>C NMR** (100 MHz, CDCl<sub>3</sub>)  $\delta$  216.9, 213.4, 196.9, 172.0, 150.6, 111.6, 107.6, 84.9, 57.0, 55.3, 48.0, 43.8, 43.4, 42.8, 41.6, 38.1, 36.5, 35.9, 34.4, 30.0, 27.1, 26.2, 25.8, 24.7, 23.4, 22.6, 21.9, 21.7, 20.1, 18.0;

**HRMS** (ESI) calcd for C<sub>30</sub>H<sub>45</sub>O<sub>4</sub> [M+H]<sup>+</sup> Exact Mass: 469.3312; found: 469.3315.

**Table S25.** NMR data (CDCl<sub>3</sub>) comparison between synthetic **8** and the reported natural product.

| position | <sup>1</sup> H & ppm (J)               |                             |                     | <sup>13</sup> C & ppm |                    |                     |
|----------|----------------------------------------|-----------------------------|---------------------|-----------------------|--------------------|---------------------|
|          | reported (500M)                        | synthesized (400M)          | error (rep. - syn.) | reported (125M)       | synthesized (100M) | error (rep. - syn.) |
| 1        | -                                      | -                           | -                   | 171.8                 | 172.0              | -0.2                |
| 2        | -                                      | -                           | -                   | 47.8                  | 48.0               | -0.2                |
| 3        | -                                      | -                           | -                   | 213.2                 | 213.4              | -0.2                |
| 4        | -                                      | -                           | -                   | 55.1                  | 55.3               | -0.2                |
| 5        | -                                      | -                           | -                   | 196.7                 | 196.9              | -0.2                |
| 6        | -                                      | -                           | -                   | 107.5                 | 107.6              | -0.1                |
| 7        | 4.06 (d, J = 6.6 Hz, 1H)               | 4.05 (d, J = 6.6 Hz, 1H)    | 0.01                | 43.3                  | 43.4               | -0.1                |
| 8        | -                                      | -                           | -                   | 216.7                 | 216.9              | -0.2                |
| 9        | 2.89 (sept, J = 6.9 Hz, 1H)            | 2.88 (sept, J = 6.9 Hz, 1H) | 0.01                | 42.7                  | 42.8               | -0.1                |
| 10       | 1.21 (d, J = 6.9 Hz, 3H)               | 1.21 (d, J = 6.7 Hz, 3H)    | 0                   | 19.9                  | 20.1               | -0.2                |
| 11       | 1.07 (d, J = 6.9 Hz, 3H)               | 1.07 (d, J = 6.7 Hz, 3H)    | 0                   | 17.9                  | 18.0               | -0.1                |
| 12       | 1.36 (s, 3H)                           | 1.36 (s, 3H)                | 0                   | 24.5                  | 24.7               | -0.2                |
| 13       | 1.43 (s, 3H)                           | 1.43 (s, 3H)                | 0                   | 25.7                  | 25.8               | -0.1                |
| 14       | 1.31 (s, 3H)                           | 1.30 (s, 3H)                | 0.01                | 22.4                  | 22.6               | -0.2                |
| 15       | 1.31 (s, 3H)                           | 1.30 (s, 3H)                | 0.01                | 26.1                  | 26.2               | -0.1                |
| 1'       | 1.59 (m, 1H)                           | 1.59 (m, 1H)                | 0                   | 56.8                  | 57.0               | -0.2                |
| 2'a      | 1.63 (m, 1H)                           | 1.63 (m, 1H)                | 0                   | 23.2                  | 23.4               | -0.2                |
| 2'b      | 1.40 (m, 1H)                           | 1.40 (m, 1H)                | 0                   |                       |                    |                     |
| 3'a      | 2.12 (brdd, J = 14.0, 10.6 Hz, 1H)     | 2.12 (m, 1H)                | 0                   | 43.7                  | 43.8               | -0.1                |
| 3'b      | 1.57 (m, 1H)                           | 1.57 (m, 1H)                | 0                   |                       |                    |                     |
| 4'       | -                                      | -                           | -                   | 84.8                  | 84.9               | -0.1                |
| 5'       | 2.08 (dt, J = 8.5, 6.9 Hz, 1H)         | 2.08 (m, 1H)                | 0                   | 38.0                  | 38.1               | -0.1                |
| 6'a      | 1.78 (m, 1H)                           | 1.78 (m, 1H)                | 0                   | 26.9                  | 27.1               | -0.2                |
| 6'b      | 1.68 (m, 1H)                           | 1.68 (m, 1H)                | 0                   |                       |                    |                     |
| 7'a      | 2.51 (ddd, J = 14.3, 10.0, 4.4 Hz, 1H) | 2.50 (m, 1H)                | 0.01                | 35.8                  | 35.9               | -0.1                |
| 7'b      | 2.24 (m, 1H)                           | 2.24 (m, 1H)                | 0                   |                       |                    |                     |
| 8'       | -                                      | -                           | -                   | 150.5                 | 150.6              | -0.1                |
| 9'       | 2.43 (q, J = 8.2 Hz, 1H)               | 2.42 (m, 1H)                | 0.01                | 41.5                  | 41.6               | -0.1                |
| 10'a     | 1.75 (t, J = 10.6 Hz, 1H)              | 1.75 (m, 1H)                | 0                   | 36.3                  | 36.5               | -0.2                |
| 10'b     | 1.62 (dd, J = 10.6, 7.7 Hz, 1H)        | 1.61 (m, 1H)                | 0.01                |                       |                    |                     |
| 11'      | -                                      | -                           | -                   | 34.3                  | 34.4               | -0.1                |
| 12'      | 0.98 (s, 3H)                           | 0.98 (s, 3H)                | 0                   | 21.8                  | 21.9               | -0.1                |
| 13'      | 0.97 (s, 3H)                           | 0.96 (s, 3H)                | 0.01                | 29.8                  | 30.0               | -0.2                |
| 14'      | 1.32 (s, 3H)                           | 1.31 (s, 3H)                | 0.01                | 21.5                  | 21.7               | -0.2                |
| 15'      | 5.00 (brs, 2H)                         | 4.99 (s, 2H)                | 0.01                | 111.5                 | 111.6              | -0.1                |

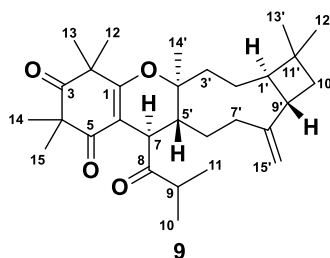

Compound **9**: 10.0 mg, 9% yield, yellow oil;

**R<sub>f</sub>** = 0.25 (petroleum ether/ethyl acetate, 20/1);

[ $\alpha$ ]<sub>D</sub><sup>25</sup> = +13.1° (c 2.0, MeOH);

**IR (KBr)**  $\nu_{\text{max}}$ : 2941, 2872, 1713, 1623, 1462, 1378, 1358, 1187, 1103, 1051, 890 cm<sup>-1</sup>;

**<sup>1</sup>H NMR** (400 MHz, CDCl<sub>3</sub>)  $\delta$  4.78 (s, 1H), 4.74 (s, 1H), 3.40 (d, J = 10.5 Hz, 1H), 2.85 (sept, J = 6.9 Hz, 1H), 2.50 (m, 1H), 2.32 (m, 1H), 2.22 (dt, J = 10.4, 5.2 Hz, 1H), 2.10 (m, 1H), 1.83 (m, 1H), 1.77 (m, 1H), 1.73 (m, 1H), 1.66 (m, 1H), 1.61 (t, J = 10.1 Hz, 1H), 1.57 (m, 1H), 1.52 (m, 1H), 1.50 (m, 1H), 1.45 (s, 3H), 1.41 (m, 1H), 1.33 (d, J = 6.9 Hz, 3H), 1.32 (s, 3H), 1.30 (s, 3H), 1.29 (s, 3H), 1.14 (d, J = 6.9 Hz, 3H), 1.07 (s, 3H), 0.99 (s, 3H), 0.97 (s, 3H);

**<sup>13</sup>C NMR** (100 MHz, CDCl<sub>3</sub>)  $\delta$  216.6, 213.1, 197.2, 171.5, 154.8, 110.3, 109.4, 83.4, 57.3, 55.3, 47.8, 47.8, 42.6, 42.2, 39.3, 39.0, 38.2, 37.8, 33.3, 33.1, 29.8, 25.4, 24.7, 24.6, 24.0, 22.3, 22.3, 20.2, 20.2, 18.6;

**HRMS** (ESI) calcd for C<sub>30</sub>H<sub>45</sub>O<sub>4</sub> [M+H]<sup>+</sup> Exact Mass: 469.3312; found: 469.3311.

**Table S26.** NMR data (CDCl<sub>3</sub>) comparison between synthetic **9** and the reported natural product.

| position | <sup>1</sup> H & ppm (J)           |                                 |                     | <sup>13</sup> C & ppm |                    |                     |
|----------|------------------------------------|---------------------------------|---------------------|-----------------------|--------------------|---------------------|
|          | reported (500M)                    | synthesized (400M)              | error (rep. - syn.) | reported (125M)       | synthesized (100M) | error (rep. - syn.) |
| 1        | -                                  | -                               | -                   | 171.3                 | 171.5              | -0.2                |
| 2        | -                                  | -                               | -                   | 47.6                  | 47.8               | -0.2                |
| 3        | -                                  | -                               | -                   | 212.9                 | 213.1              | -0.2                |
| 4        | -                                  | -                               | -                   | 55.1                  | 55.3               | -0.2                |
| 5        | -                                  | -                               | -                   | 197.0                 | 197.2              | -0.2                |
| 6        | -                                  | -                               | -                   | 109.3                 | 109.4              | -0.1                |
| 7        | 3.40 (d, J = 10.5 Hz, 1H)          | 3.40 (d, J = 10.5 Hz, 1H)       | 0                   | 47.6                  | 47.8               | -0.2                |
| 8        | -                                  | -                               | -                   | 216.3                 | 216.6              | -0.3                |
| 9        | 2.85 (sept, J = 6.9 Hz, 1H)        | 2.85 (sept, J = 6.9 Hz, 1H)     | 0                   | 42.4                  | 42.6               | -0.2                |
| 10       | 1.33 (d, J = 6.9 Hz, 3H)           | 1.33 (d, J = 6.9 Hz, 3H)        | 0                   | 20.1                  | 20.2               | -0.1                |
| 11       | 1.14 (d, J = 6.9 Hz, 3H)           | 1.14 (d, J = 6.9 Hz, 3H)        | 0                   | 18.4                  | 18.6               | -0.2                |
| 12       | 1.32 (s, 3H)                       | 1.32 (s, 3H)                    | 0                   | 25.2                  | 25.4               | -0.2                |
| 13       | 1.44 (s, 3H)                       | 1.45 (s, 3H)                    | -0.01               | 24.6                  | 24.7               | -0.1                |
| 14       | 1.30 (s, 3H)                       | 1.30 (s, 3H)                    | 0                   | 23.8                  | 24.0               | -0.2                |
| 15       | 1.29 (s, 3H)                       | 1.29 (s, 3H)                    | 0                   | 24.5                  | 24.6               | -0.1                |
| 1'       | 1.56 (m, 1H)                       | 1.57 (m, 1H)                    | -0.01               | 57.1                  | 57.3               | -0.2                |
| 2'a      | 1.52 (m, 1H)                       | 1.52 (m, 1H)                    | 0                   | 22.1                  | 22.3               | -0.2                |
| 2'b      | 1.42 (m, 1H)                       | 1.41 (m, 1H)                    | 0.01                | -                     | -                  | -                   |
| 3'a      | 2.10 (brdd, J = 15.5, 10.9 Hz, 1H) | 2.10 (m, 1H)                    | 0                   | 38.0                  | 38.2               | -0.2                |
| 3'b      | 1.77 (brdd, J = 15.5, 6.4 Hz, 1H)  | 1.77 (m, 1H)                    | 0                   | -                     | -                  | -                   |
| 4'       | -                                  | -                               | -                   | 83.2                  | 83.4               | -0.2                |
| 5'       | 2.22 (dt, J = 10.5, 5.2 Hz, 1H)    | 2.22 (dt, J = 10.4, 5.2 Hz, 1H) | -0.01               | 39.2                  | 39.3               | -0.1                |
| 6'a      | 1.67 (m, 1H)                       | 1.66 (m, 1H)                    | 0.01                | 33.0                  | 33.1               | -0.1                |
| 6'b      | 1.50 (m, 1H)                       | 1.50 (m, 1H)                    | 0                   | -                     | -                  | -                   |
| 7'a      | 2.32 (brdd, J = 13.3, 9.7 Hz, 1H)  | 2.32 (m, 1H)                    | 0.01                | 37.6                  | 37.8               | -0.2                |
| 7'b      | 1.84 (brdd, J = 13.3, 8.6 Hz, 1H)  | 1.83 (m, 1H)                    | 0.01                | -                     | -                  | -                   |
| 8'       | -                                  | -                               | -                   | 154.7                 | 154.8              | -0.1                |
| 9'       | 2.49 (q, J = 9.1 Hz, 1H)           | 2.50 (q, J = 9.2 Hz, 1H)        | -0.01               | 42.1                  | 42.2               | -0.1                |
| 10'a     | 1.74 (dd, J = 10.5, 8.4 Hz, 1H)    | 1.73 (m, 1H)                    | 0.01                | 38.9                  | 39.0               | -0.1                |
| 10'b     | 1.61 (t, J = 10.1 Hz, 1H)          | 1.61 (t, J = 10.1 Hz, 1H)       | 0                   | -                     | -                  | -                   |
| 11'      | -                                  | -                               | -                   | 33.2                  | 33.3               | -0.1                |
| 12'      | 0.97 (s, 3H)                       | 0.97 (s, 3H)                    | 0                   | 22.1                  | 22.3               | -0.2                |
| 13'      | 0.99 (s, 3H)                       | 0.99 (s, 3H)                    | 0                   | 29.6                  | 29.8               | -0.2                |
| 14'      | 1.07 (s, 3H)                       | 1.07 (s, 3H)                    | 0                   | 20.0                  | 20.2               | -0.2                |
| 15'a     | 4.78 (brs, 1H)                     | 4.78 (s, 1H)                    | 0                   | 110.1                 | 110.3              | -0.2                |
| 15'b     | 4.74 (brs, 1H)                     | 4.74 (s, 1H)                    | 0                   | -                     | -                  | -                   |

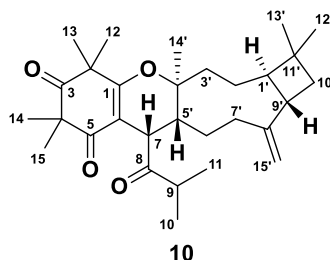

Compound **10**: 8.8 mg, 8% yield, yellow oil;

$R_f = 0.4$  (petroleum ether/ethyl acetate, 20/1);

$[\alpha]_D^{25} = -91.4^\circ$  (c 1.0, MeOH);

**IR** (KBr)  $\nu_{\max}$ : 2938, 2868, 1712, 1621, 1464, 1378, 1358, 1289, 1192, 1049, 890, 759  $\text{cm}^{-1}$ ;

**<sup>1</sup>H NMR** (400 MHz, CDCl<sub>3</sub>)  $\delta$  4.87 (s, 1H), 4.81 (s, 1H), 4.20 (d, J = 7.2 Hz, 1H), 2.83 (m, 1H), 2.57 (m, 1H), 2.50 (m, 1H), 2.36 (m, 1H), 2.27 (m, 1H), 2.05 (m, 1H), 1.78 (m, 1H), 1.73 (m, 2H), 1.67 (m, 1H), 1.54 (m, 1H), 1.50 (m, 1H), 1.43 (s, 3H), 1.37 (s, 3H), 1.35 (s, 3H), 1.32 (d, J = 6.8 Hz, 3H), 1.30 (s, 3H), 1.25 (m, 2H), 1.14 (s, 3H), 1.06 (d, J = 6.8 Hz, 3H), 0.99 (s, 3H), 0.94 (s, 3H);

**<sup>13</sup>C NMR** (100 MHz, CDCl<sub>3</sub>)  $\delta$  217.0, 213.3, 197.3, 171.7, 153.8, 110.6, 107.9, 84.0, 57.6, 55.5, 47.9, 43.0, 42.9, 42.7, 40.7, 39.0, 37.5, 36.9, 33.7, 29.7, 28.5, 27.2, 25.5, 24.8, 23.2, 22.4, 21.4, 21.0, 20.7, 17.6;

**HRMS** (ESI) calcd for C<sub>30</sub>H<sub>45</sub>O<sub>4</sub> [M+H]<sup>+</sup> Exact Mass: 469.3312; found: 469.3309.

**Table S27.** NMR data (CDCl<sub>3</sub>) comparison between synthetic **10** and the reported natural product.

| position | <sup>1</sup> H & ppm (J)         |                          |                     | <sup>13</sup> C & ppm |                    |                     |
|----------|----------------------------------|--------------------------|---------------------|-----------------------|--------------------|---------------------|
|          | reported (300M)                  | synthesized (400M)       | error (rep. - syn.) | reported (75M)        | synthesized (100M) | error (rep. - syn.) |
| 1        | -                                | -                        | -                   | 171.7                 | 171.7              | 0                   |
| 2        | -                                | -                        | -                   | 47.9                  | 47.9               | 0                   |
| 3        | -                                | -                        | -                   | 213.2                 | 213.3              | -0.1                |
| 4        | -                                | -                        | -                   | 55.5                  | 55.5               | 0                   |
| 5        | -                                | -                        | -                   | 197.3                 | 197.3              | 0                   |
| 6        | -                                | -                        | -                   | 107.9                 | 107.9              | 0                   |
| 7        | 4.19 (d, J = 7.3 Hz, 1H)         | 4.20 (d, J = 7.2 Hz, 1H) | -0.01               | 42.9                  | 42.9               | 0                   |
| 8        | -                                | -                        | -                   | 216.9                 | 217.0              | -0.1                |
| 9        | 2.83 (m, 1H)                     | 2.83 (m, 1H)             | 0                   | 43.0                  | 43.0               | 0                   |
| 10       | 1.32 (d, J = 6.5 Hz, 3H)         | 1.32 (d, J = 6.8 Hz, 3H) | 0                   | 20.7                  | 20.7               | 0                   |
| 11       | 1.06 (d, J = 6.5 Hz, 3H)         | 1.06 (d, J = 6.8 Hz, 3H) | 0                   | 17.6                  | 17.6               | 0                   |
| 12       | 1.37 (s, 3H)                     | 1.37 (s, 3H)             | 0                   | 24.9                  | 24.8               | 0.1                 |
| 13       | 1.43 (s, 3H)                     | 1.43 (s, 3H)             | 0                   | 25.5                  | 25.5               | 0                   |
| 14       | 1.34 (s, 3H)                     | 1.35 (s, 3H)             | -0.01               | 27.1                  | 27.2               | -0.1                |
| 15       | 1.30 (s, 3H)                     | 1.30 (s, 3H)             | 0                   | 21.4                  | 21.4               | 0                   |
| 1'       | 1.53 (m, 1H)                     | 1.54 (m, 1H)             | -0.01               | 57.6                  | 57.6               | 0                   |
| 2'       | 1.25 (m, 2H)                     | 1.25 (m, 2H)             | 0                   | 23.2                  | 23.2               | 0                   |
| 3'a      | 2.05 (dd, J = 15.5, 10.0 Hz, 1H) | 2.05 (m, 1H)             | 0                   | 40.8                  | 40.7               | 0.1                 |
| 3'b      | 1.76 (m, 1H)                     | 1.78 (m, 1H)             | -0.02               | -                     | -                  | -                   |
| 4'       | -                                | -                        | -                   | 84.0                  | 84.0               | 0                   |
| 5'       | 2.36 (m, 1H)                     | 2.36 (m, 1H)             | 0                   | 39.0                  | 39.0               | 0                   |
| 6'a      | 1.68 (m, 1H)                     | 1.67 (m, 1H)             | 0.01                | 28.5                  | 28.5               | 0                   |
| 6'b      | 1.51 (m, 1H)                     | 1.50 (m, 1H)             | 0.01                | -                     | -                  | -                   |
| 7'a      | 2.49 (m, 1H)                     | 2.50 (m, 1H)             | -0.01               | 36.9                  | 36.9               | 0                   |
| 7'b      | 2.28 (m, 1H)                     | 2.27 (m, 1H)             | 0.01                | -                     | -                  | -                   |
| 8'       | -                                | -                        | -                   | 153.8                 | 153.8              | 0                   |
| 9'       | 2.56 (m, 1H)                     | 2.57 (m, 1H)             | -0.01               | 42.7                  | 42.7               | 0                   |
| 10'      | 1.74 (m, 2H)                     | 1.73 (m, 2H)             | 0.01                | 37.6                  | 37.5               | 0.1                 |
| 11'      | -                                | -                        | -                   | 33.7                  | 33.7               | 0                   |
| 12'      | 0.93 (s, 3H)                     | 0.94 (s, 3H)             | -0.01               | 22.4                  | 22.4               | 0                   |
| 13'      | 0.98 (s, 3H)                     | 0.99 (s, 3H)             | -0.01               | 29.7                  | 29.7               | 0                   |
| 14'      | 1.14 (s, 3H)                     | 1.14 (s, 3H)             | 0                   | 21.0                  | 21.0               | 0                   |
| 15'a     | 4.87 (brs, 1H)                   | 4.87 (brs, 1H)           | 0                   | 110.6                 | 110.6              | 0                   |
| 15'b     | 4.71 (brs, 1H)                   | 4.71 (brs, 1H)           | 0                   | -                     | -                  | -                   |

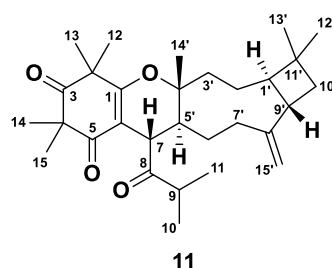

Compound **11**: 12.0 mg, 11% yield, yellow oil;

$R_f$  = 0.13 (petroleum ether/ethyl acetate, 20/1);

$[\alpha]_D^{25}$  = +25.6° (c 0.5, MeOH);

**IR** (KBr)  $\nu_{\max}$ : 2936, 2868, 1713, 1623, 1462, 1380, 1355, 1289, 1190, 1051, 892, 759 cm<sup>-1</sup>;

**<sup>1</sup>H NMR** (400 MHz, CDCl<sub>3</sub>)  $\delta$  4.83 (s, 1H), 4.75 (s, 1H), 3.24 (d, J = 10.7 Hz, 1H), 2.72 (m, 1H), 2.38 (m, 1H), 2.33 (m, 1H), 2.24 (m, 1H), 2.14 (m, 1H), 2.07 (m, 1H), 1.95 (m, 1H), 1.95 (m, 1H), 1.78 (m, 1H), 1.74 (m, 1H), 1.63 (m, 2H), 1.52 (m, 1H), 1.47 (m, 1H), 1.45 (s, 3H), 1.35 (s, 3H), 1.31 (s, 3H), 1.27 (s, 3H), 1.18 (d, J = 6.8 Hz, 3H), 1.13 (s, 3H), 1.05 (d, J = 6.8 Hz, 3H), 0.98 (s, 3H), 0.98 (s, 3H);

**<sup>13</sup>C NMR** (100 MHz, CDCl<sub>3</sub>)  $\delta$  215.2, 213.0, 197.4, 171.7, 151.0, 111.5, 109.1, 83.2, 55.2, 51.9, 49.5, 47.8, 42.1, 39.6, 38.3, 37.0, 36.7, 35.0, 33.8, 31.7, 30.4, 25.3, 25.1, 24.8, 23.6, 22.4, 22.3, 21.2, 20.7, 19.8;

**HRMS** (ESI) calcd for C<sub>30</sub>H<sub>45</sub>O<sub>4</sub> [M+H]<sup>+</sup> Exact Mass: 469.3312; found: 469.3310.

**Table S28.** NMR data (CDCl<sub>3</sub>) comparison between synthetic **11** and the reported natural product.

| position | <sup>1</sup> H & ppm (J)  |                           |                     | <sup>13</sup> C & ppm |                    |                     |
|----------|---------------------------|---------------------------|---------------------|-----------------------|--------------------|---------------------|
|          | reported (300M)           | synthesized (400M)        | error (rep. - syn.) | reported (75M)        | synthesized (100M) | error (rep. - syn.) |
| 1        | -                         | -                         | -                   | 171.7                 | 171.7              | 0                   |
| 2        | -                         | -                         | -                   | 47.8                  | 47.8               | 0                   |
| 3        | -                         | -                         | -                   | 213.0                 | 213.0              | 0                   |
| 4        | -                         | -                         | -                   | 55.2                  | 55.2               | 0                   |
| 5        | -                         | -                         | -                   | 197.4                 | 197.4              | 0                   |
| 6        | -                         | -                         | -                   | 109.0                 | 109.1              | -0.1                |
| 7        | 3.23 (d, J = 10.6 Hz, 1H) | 3.24 (d, J = 10.7 Hz, 1H) | -0.01               | 49.5                  | 49.5               | 0                   |
| 8        | -                         | -                         | -                   | 215.2                 | 215.2              | 0                   |
| 9        | 2.72 (m, 1H)              | 2.72 (m, 1H)              | 0                   | 39.6                  | 39.6               | 0                   |
| 10       | 1.18 (d, J = 6.8 Hz, 3H)  | 1.18 (d, J = 6.8 Hz, 3H)  | 0                   | 20.7                  | 20.7               | 0                   |
| 11       | 1.05 (d, J = 6.8 Hz, 3H)  | 1.05 (d, J = 6.8 Hz, 3H)  | 0                   | 19.8                  | 19.8               | 0                   |
| 12       | 1.35 (s, 3H)              | 1.35 (s, 3H)              | 0                   | 25.3                  | 25.3               | 0                   |
| 13       | 1.44 (s, 3H)              | 1.45 (s, 3H)              | -0.01               | 25.1                  | 25.1               | 0                   |
| 14       | 1.30 (s, 3H)              | 1.31 (s, 3H)              | -0.01               | 24.8                  | 24.8               | 0                   |
| 15       | 1.27 (s, 3H)              | 1.27 (s, 3H)              | 0                   | 23.6                  | 23.6               | 0                   |
| 1'       | 1.95 (m, 1H)              | 1.95 (m, 1H)              | 0                   | 51.9                  | 51.9               | 0                   |
| 2'a      | 1.77 (m, 1H)              | 1.78 (m, 1H)              | -0.01               | 22.4                  | 22.4               | 0                   |
| 2'b      | 1.46 (m, 1H)              | 1.47 (m, 1H)              | -0.01               | -                     | -                  | -                   |
| 3'a      | 2.14 (m, 1H)              | 2.14 (m, 1H)              | 0                   | 37.0                  | 37.0               | 0                   |
| 3'b      | 1.94 (m, 1H)              | 1.95 (m, 1H)              | -0.01               | -                     | -                  | -                   |
| 4'       | -                         | -                         | -                   | 83.2                  | 83.2               | 0                   |
| 5'       | 2.23 (m, 1H)              | 2.24 (m, 1H)              | -0.01               | 38.3                  | 38.3               | 0                   |
| 6'a      | 1.74 (m, 1H)              | 1.74 (m, 1H)              | 0                   | 31.7                  | 31.7               | 0                   |
| 6'b      | 1.51 (m, 1H)              | 1.52 (m, 1H)              | -0.01               | -                     | -                  | -                   |
| 7'a      | 2.34 (m, 1H)              | 2.33 (m, 1H)              | 0.01                | 35.0                  | 35.0               | 0                   |
| 7'b      | 2.08 (m, 1H)              | 2.07 (m, 1H)              | 0.01                | -                     | -                  | -                   |
| 8'       | -                         | -                         | -                   | 151.0                 | 151.0              | 0                   |
| 9'       | 2.36 (m, 1H)              | 2.38 (m, 1H)              | -0.02               | 42.1                  | 42.1               | 0                   |
| 10'      | 1.62 (m, 2H)              | 1.63 (m, 2H)              | -0.01               | 36.7                  | 36.7               | 0                   |
| 11'      | -                         | -                         | -                   | 33.8                  | 33.8               | 0                   |
| 12'      | 0.98 (s, 3H)              | 0.98 (s, 3H)              | 0                   | 22.3                  | 22.3               | 0                   |
| 13'      | 0.98 (s, 3H)              | 0.98 (s, 3H)              | 0                   | 30.4                  | 30.4               | 0                   |
| 14'      | 1.13 (s, 3H)              | 1.13 (s, 3H)              | 0                   | 21.2                  | 21.2               | 0                   |
| 15'a     | 4.83 (s, 1H)              | 4.83 (s, 1H)              | 0                   | 115.5                 | 115.5              | 0                   |
| 15'b     | 4.75 (s, 1H)              | 4.75 (s, 1H)              | 0                   | -                     | -                  | -                   |

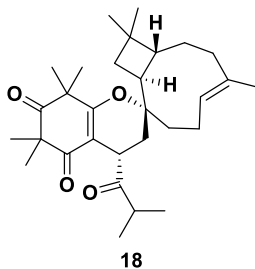

Compound **18**: 11.0 mg, 10% yield, colorless needle crystals, mp 187–190 °C;

**R<sub>f</sub>** = 0.38 (petroleum ether/ethyl acetate, 20/1);

**[α]<sub>D</sub><sup>25</sup>** = -43.0° (c 0.5, MeOH);

**IR (KBr)**  $\nu_{\text{max}}$ : 2968, 2931, 2866, 1709, 1630, 1457, 1387, 1358, 1290, 1185, 1076, 1042, 849, 756, 611 cm<sup>-1</sup>;

**<sup>1</sup>H NMR** (400 MHz, CDCl<sub>3</sub>)  $\delta$  5.13 (brs, 1H), 3.97 (m, 1H), 3.07 (m, 1H), 1.66 (s, 3H), 1.40 (s, 3H), 1.39 (d, J = 6.8 Hz, 3H), 1.38 (s, 3H), 1.28 (s, 3H), 1.28 (s, 3H), 1.20 (d, J = 6.8 Hz, 3H), 0.97 (s, 3H), 0.93 (brs, 3H);

**<sup>13</sup>C NMR** (100 MHz, CDCl<sub>3</sub>)  $\delta$  213.9, 213.5, 197.4, 55.7, 48.0, 38.8, 37.6, 29.9, 27.5, 25.6, 24.7, 23.3, 21.2, 20.6, 17.7;

**HRMS** (ESI) calcd for C<sub>30</sub>H<sub>45</sub>O<sub>4</sub> [M+H]<sup>+</sup> Exact Mass: 469.3312; found: 469.3316.

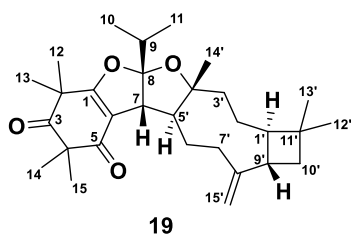

Compound **19**: 3.3 mg, 3% yield, yellow oil;

$R_f = 0.4$  (petroleum ether/ethyl acetate, 20/1);

$[\alpha]_D^{25} = +23.1^\circ$  ( $c$  1.0, MeOH);

**IR** (KBr)  $\nu_{\max}$ : 2963, 2934, 2868, 1715, 1628, 1464, 1410, 1378, 1269, 1187, 1123, 1098, 1051, 913, 761  $\text{cm}^{-1}$ ;

**$^1\text{H}$  NMR** (400 MHz,  $\text{CDCl}_3$ )  $\delta$  4.89 (s, 1H), 4.78 (s, 1H), 3.16 (d,  $J = 8.2$  Hz, 1H), 2.42 (m, 1H), 2.40 (m, 1H), 2.32 (m, 1H), 1.97 (m, 1H), 1.95 (m, 1H), 1.88 (m, 1H), 1.86 (m, 1H), 1.73 (m, 1H), 1.68 (m, 1H), 1.66 (m, 1H), 1.65 (m, 1H), 1.55 (m, 1H), 1.52 (m, 1H), 1.40 (s, 3H), 1.40 (s, 3H), 1.35 (s, 3H), 1.32 (s, 3H), 1.31 (m, 1H), 1.17 (s, 3H), 0.99 (d,  $J = 6.7$  Hz, 3H), 0.94 (s, 3H), 0.93 (d,  $J = 6.7$  Hz, 3H), 0.90 (s, 3H);

**$^{13}\text{C}$  NMR** (100 MHz,  $\text{CDCl}_3$ )  $\delta$  213.8, 193.5, 175.9, 152.7, 127.5, 116.1, 111.0, 89.9, 57.9, 55.5, 52.9, 50.2, 45.5, 42.9, 41.4, 36.2, 35.9, 35.3, 33.8, 30.3, 30.0, 25.2, 25.0, 24.1, 23.7, 22.6, 22.6, 22.4, 16.9, 16.8;

**HRMS** (ESI) calcd for  $\text{C}_{30}\text{H}_{45}\text{O}_4$   $[\text{M}+\text{H}]^+$  Exact Mass: 469.3312; found: 469.3311.

**Table S29.** NMR data ( $\text{CDCl}_3$ ) comparison between synthetic **19** and the reported natural product.

| position | $^1\text{H}$ & ppm ( $J$ )        |                            |                     | $^{13}\text{C}$ & ppm |                    |                     |
|----------|-----------------------------------|----------------------------|---------------------|-----------------------|--------------------|---------------------|
|          | reported (500M)                   | synthesized (400M)         | error (rep. - syn.) | reported (125M)       | synthesized (100M) | error (rep. - syn.) |
| 1        | -                                 | -                          | -                   | 175.7                 | 175.9              | -0.2                |
| 2        | -                                 | -                          | -                   | 45.4                  | 45.5               | -0.1                |
| 3        | -                                 | -                          | -                   | 213.6                 | 213.8              | -0.2                |
| 4        | -                                 | -                          | -                   | 55.3                  | 55.5               | -0.2                |
| 5        | -                                 | -                          | -                   | 193.3                 | 193.5              | -0.2                |
| 6        | -                                 | -                          | -                   | 115.9                 | 116.1              | -0.2                |
| 7        | 3.16 (d, $J = 8.3$ Hz, 1H)        | 3.16 (d, $J = 8.2$ Hz, 1H) | 0                   | 52.7                  | 52.9               | -0.2                |
| 8        | -                                 | -                          | -                   | 127.3                 | 127.5              | -0.2                |
| 9        | 1.94 (sept, $J = 6.8$ Hz, 1H)     | 1.95 (m, 1H)               | -0.01               | 35.8                  | 35.9               | -0.1                |
| 10       | 0.99 (d, $J = 6.8$ Hz, 3H)        | 0.99 (d, $J = 6.7$ Hz, 3H) | 0                   | 16.6                  | 16.8               | -0.2                |
| 11       | 0.93 (d, $J = 6.8$ Hz, 3H)        | 0.93 (d, $J = 6.7$ Hz, 3H) | 0                   | 16.7                  | 16.9               | -0.2                |
| 12       | 1.40 (s, 3H)                      | 1.40 (s, 3H)               | 0                   | 24.8                  | 25.0               | -0.2                |
| 13       | 1.40 (s, 3H)                      | 1.40 (s, 3H)               | 0                   | 23.6                  | 23.7               | -0.1                |
| 14       | 1.33 (s, 3H)                      | 1.32 (s, 3H)               | 0.01                | 23.9                  | 24.1               | -0.2                |
| 15       | 1.35 (s, 3H)                      | 1.35 (s, 3H)               | 0                   | 25.1                  | 25.2               | -0.1                |
| 1'       | 1.53 (m, 1H)                      | 1.52 (m, 1H)               | 0.01                | 57.7                  | 57.9               | -0.2                |
| 2'a      | 1.65 (m, 1H)                      | 1.65 (m, 1H)               | 0                   | 22.8                  | 22.6               | 0.2                 |
| 2'b      | 1.32 (m, 1H)                      | 1.31 (m, 1H)               | 0.01                | -                     | -                  | -                   |
| 3'a      | 2.40 (m, 1H)                      | 2.40 (m, 1H)               | 0                   | 41.4                  | 41.4               | 0                   |
| 3'b      | 1.67 (m, 1H)                      | 1.66 (m, 1H)               | 0.01                | -                     | -                  | -                   |
| 4'       | -                                 | -                          | -                   | 89.7                  | 89.9               | -0.2                |
| 5'       | 1.97 (m, 1H)                      | 1.97 (m, 1H)               | 0                   | 50.1                  | 50.2               | -0.1                |
| 6'a      | 1.88 (m, 1H)                      | 1.88 (m, 1H)               | 0                   | 29.8                  | 30.0               | -0.2                |
| 6'b      | 1.73 (m, 1H)                      | 1.73 (m, 1H)               | 0                   | -                     | -                  | -                   |
| 7'a      | 2.43 (m, 1H)                      | 2.42 (m, 1H)               | 0.01                | 35.2                  | 35.3               | -0.1                |
| 7'b      | 1.87 (m, 1H)                      | 1.86 (m, 1H)               | 0.01                | -                     | -                  | -                   |
| 8'       | -                                 | -                          | -                   | 152.6                 | 152.7              | -0.1                |
| 9'       | 2.33 (q, $J = 9.0$ Hz, 1H)        | 2.32 (m, 1H)               | 0.01                | 42.7                  | 42.9               | -0.2                |
| 10'a     | 1.68 (t, $J = 10.6$ Hz, 1H)       | 1.68 (m, 1H)               | 0                   | 36.1                  | 36.2               | -0.1                |
| 10'b     | 1.55 (dd, $J = 10.6, 7.8$ Hz, 1H) | 1.55 (m, 1H)               | 0                   | -                     | -                  | -                   |
| 11'      | -                                 | -                          | -                   | 33.7                  | 33.8               | -0.1                |
| 12'      | 0.90 (s, 3H)                      | 0.90 (s, 3H)               | 0                   | 22.2                  | 22.4               | -0.2                |
| 13'      | 0.94 (s, 3H)                      | 0.94 (s, 3H)               | 0                   | 30.1                  | 30.3               | -0.2                |
| 14'      | 1.17 (s, 3H)                      | 1.17 (s, 3H)               | 0                   | 22.5                  | 22.6               | -0.1                |
| 15'a     | 4.89 (s, 1H)                      | 4.89 (s, 1H)               | 0                   | 110.9                 | 111.0              | -0.1                |
| 15'b     | 4.78 (s, 1H)                      | 4.78 (s, 1H)               | 0                   | -                     | -                  | -                   |



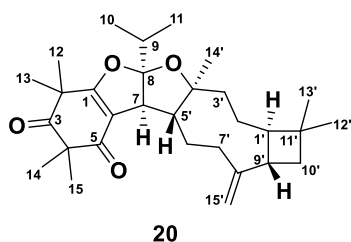

Compound **20**: 1.1 mg, 1% yield, yellow oil;

$R_f = 0.3$  (petroleum ether/ethyl acetate, 20/1);

$[\alpha]_D^{25} = -59.2^\circ$  ( $c$  0.5, MeOH);

**IR (KBr)**  $\nu_{\max}$ : 2941, 2872, 1713, 1628, 1571, 1462, 1373, 1264, 1187, 1119, 1051, 913, 768, 615, 464  $\text{cm}^{-1}$ ;

**$^1\text{H NMR}$**  (400 MHz,  $\text{CDCl}_3$ )  $\delta$  4.73 (s, 1H), 4.47 (s, 1H), 3.18 (d,  $J = 9.8$  Hz, 1H), 2.61 (q,  $J = 9.2$  Hz, 1H), 2.36 (m, 1H), 2.19 (m, 1H), 2.15 (m, 1H), 2.05 (m, 1H), 2.03 (m, 1H), 1.88 (m, 1H), 1.86 (m, 1H), 1.71 (m, 1H), 1.50 (m, 1H), 1.50 (m, 1H), 1.48 (m, 1H), 1.47 (s, 3H), 1.45 (m, 1H), 1.43 (s, 3H), 1.36 (m, 1H), 1.34 (s, 3H), 1.33 (s, 3H), 1.13 (s, 3H), 1.07 (d,  $J = 6.8$  Hz, 3H), 0.94 (s, 3H), 0.90 (d,  $J = 6.8$  Hz, 3H), 0.89 (s, 3H);

**$^{13}\text{C NMR}$**  (100 MHz,  $\text{CDCl}_3$ )  $\delta$  213.4, 193.7, 176.2, 154.4, 126.0, 116.0, 110.8, 88.7, 55.8, 53.6, 52.3, 51.5, 45.6, 43.6, 40.5, 40.1, 37.3, 33.4, 33.3, 29.7, 29.3, 25.3, 25.0, 23.9, 23.8, 23.4, 23.1, 22.8, 17.0, 16.4;

**HRMS** (ESI) calcd for  $\text{C}_{30}\text{H}_{45}\text{O}_4$   $[\text{M}+\text{H}]^+$  Exact Mass: 469.3312; found: 469.3312.

**Table S30.** NMR data ( $\text{CDCl}_3$ ) comparison between synthetic **20** and the reported natural product.

| position | $^1\text{H}$ & ppm ( $J$ )        |                            |                     | $^{13}\text{C}$ & ppm |                    |                     |
|----------|-----------------------------------|----------------------------|---------------------|-----------------------|--------------------|---------------------|
|          | reported (500M)                   | synthesized (400M)         | error (rep. - syn.) | reported (125M)       | synthesized (100M) | error (rep. - syn.) |
| 1        | -                                 | -                          | -                   | 176.0                 | 176.2              | -0.2                |
| 2        | -                                 | -                          | -                   | 45.4                  | 45.6               | -0.2                |
| 3        | -                                 | -                          | -                   | 213.3                 | 213.4              | -0.1                |
| 4        | -                                 | -                          | -                   | 55.7                  | 55.8               | -0.1                |
| 5        | -                                 | -                          | -                   | 193.6                 | 193.7              | -0.1                |
| 6        | -                                 | -                          | -                   | 115.8                 | 116.0              | -0.2                |
| 7        | 3.18 (d, $J = 9.9$ Hz, 1H)        | 3.18 (d, $J = 9.8$ Hz, 1H) | 0                   | 52.2                  | 52.3               | -0.1                |
| 8        | -                                 | -                          | -                   | 125.8                 | 126.0              | -0.2                |
| 9        | 1.89 (sept, $J = 6.8$ Hz, 1H)     | 1.88 (m, 1H)               | 0.01                | 37.1                  | 37.3               | -0.2                |
| 10       | 1.07 (d, $J = 6.8$ Hz, 3H)        | 1.07 (d, $J = 6.8$ Hz, 3H) | 0                   | 16.3                  | 16.4               | -0.1                |
| 11       | 0.90 (d, $J = 6.8$ Hz, 3H)        | 0.90 (d, $J = 6.8$ Hz, 3H) | 0                   | 16.8                  | 17.0               | -0.2                |
| 12       | 1.47 (s, 3H)                      | 1.47 (s, 3H)               | 0                   | 25.2                  | 25.3               | -0.1                |
| 13       | 1.43 (s, 3H)                      | 1.43 (s, 3H)               | 0                   | 23.6                  | 23.8               | -0.2                |
| 14       | 1.33 (s, 3H)                      | 1.33 (s, 3H)               | 0                   | 23.8                  | 23.9               | -0.1                |
| 15       | 1.34 (s, 3H)                      | 1.34 (s, 3H)               | 0                   | 24.8                  | 25.0               | -0.2                |
| 1'       | 1.50 (td, $J = 9.7, 1.5$ Hz, 1H)  | 1.50 (m, 1H)               | 0                   | 53.5                  | 53.6               | -0.1                |
| 2'a      | 1.50 (m, 1H)                      | 1.50 (m, 1H)               | 0                   | 22.9                  | 23.1               | -0.2                |
| 2'b      | 1.35 (m, 1H)                      | 1.36 (m, 1H)               | -0.01               | -                     | -                  | -                   |
| 3'a      | 2.35 (dd, $J = 15.5, 9.2$ Hz, 1H) | 2.36 (m, 1H)               | -0.01               | 39.9                  | 40.1               | -0.2                |
| 3'b      | 1.45 (m, 1H)                      | 1.45 (m, 1H)               | 0                   | -                     | -                  | -                   |
| 4'       | -                                 | -                          | -                   | 88.5                  | 88.7               | -0.2                |
| 5'       | 2.16 (dt, $J = 9.9, 3.5$ Hz, 1H)  | 2.15 (m, 1H)               | 0.01                | 51.3                  | 51.5               | -0.2                |
| 6'a      | 2.05 (m, 1H)                      | 2.05 (m, 1H)               | 0                   | 29.1                  | 29.3               | -0.2                |
| 6'b      | 1.71 (m, 1H)                      | 1.71 (m, 1H)               | 0                   | -                     | -                  | -                   |
| 7'a      | 2.18 (m, 1H)                      | 2.19 (m, 1H)               | -0.01               | 33.1                  | 33.3               | -0.2                |
| 7'b      | 2.04 (m, 1H)                      | 2.03 (m, 1H)               | 0.01                | -                     | -                  | -                   |
| 8'       | -                                 | -                          | -                   | 154.2                 | 154.4              | -0.2                |
| 9'       | 2.61 (q, $J = 8.6$ Hz, 1H)        | 2.61 (q, $J = 9.2$ Hz, 1H) | 0.01                | 43.4                  | 43.6               | -0.2                |
| 10'a     | 1.88 (t, $J = 7.5$ Hz, 1H)        | 1.86 (m, 1H)               | 0.02                | 40.3                  | 40.5               | -0.2                |
| 10'b     | 1.49 (m, 1H)                      | 1.48 (m, 1H)               | 0.01                | -                     | -                  | -                   |
| 11'      | -                                 | -                          | -                   | 33.3                  | 33.4               | -0.1                |
| 12'      | 0.89 (s, 3H)                      | 0.89 (s, 3H)               | 0                   | 22.6                  | 22.8               | -0.2                |
| 13'      | 0.94 (s, 3H)                      | 0.94 (s, 3H)               | 0                   | 29.5                  | 29.7               | -0.2                |
| 14'      | 1.13 (s, 3H)                      | 1.13 (s, 3H)               | 0                   | 23.2                  | 23.4               | -0.2                |
| 15'a     | 4.73 (brs, 1H)                    | 4.73 (s, 1H)               | 0                   | 110.6                 | 110.8              | -0.2                |
| 15'b     | 4.47 (brs, 1H)                    | 4.47 (s, 1H)               | 0                   | -                     | -                  | -                   |

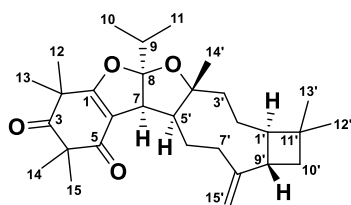

21

Compound **21**: 3.3 mg, 3% yield, yellow oil;

$R_f = 0.43$  (petroleum ether/ethyl acetate, 20/1);

$[\alpha]_D^{25} = -20.3^\circ$  ( $c$  1.0, MeOH);

**IR** (KBr)  $\nu_{\max}$ : 2968, 2936, 2871, 1713, 1628, 1571, 1464, 1410, 1190, 1123, 1098, 1051, 913, 761  $\text{cm}^{-1}$ ;

**$^1\text{H}$  NMR** (400 MHz,  $\text{CDCl}_3$ )  $\delta$  5.02 (s, 2H), 3.64 (d,  $J = 9.4$  Hz, 1H), 2.61 (m, 1H), 2.40 (m, 1H), 2.12 (m, 1H), 2.08 (m, 1H), 2.05 (m, 1H), 1.97 (dd,  $J = 13.9, 9.7$  Hz, 1H), 1.79 (t,  $J = 10.5$  Hz, 1H), 1.59 (dd,  $J = 10.5, 7.8$  Hz, 1H), 1.56 (m, 1H), 1.48 (m, 1H), 1.44 (m, 1H), 1.43 (s, 3H), 1.40 (s, 3H), 1.39 (s, 3H), 1.34 (m, 1H), 1.33 (s, 3H), 1.25 (m, 2H), 1.11 (s, 3H), 0.99 (s, 3H), 0.97 (s, 3H), 0.96 (d,  $J = 6.8$  Hz, 3H), 0.91 (d,  $J = 6.8$  Hz, 3H);

**$^{13}\text{C}$  NMR** (100 MHz,  $\text{CDCl}_3$ )  $\delta$  213.5, 194.5, 177.6, 152.4, 127.3, 112.2, 111.1, 88.8, 60.1, 55.8, 48.7, 45.6, 45.2, 44.6, 42.4, 37.0, 36.4, 35.4, 34.5, 29.9, 29.9, 26.3, 24.5, 24.0, 23.4, 23.1, 22.1, 22.1, 16.5, 16.5;

**HRMS** (ESI) calcd for  $\text{C}_{30}\text{H}_{45}\text{O}_4$   $[\text{M}+\text{H}]^+$  Exact Mass: 469.3312; found: 469.3309.

**Table S31.** NMR data ( $\text{CDCl}_3$ ) comparison between synthetic **21** and the reported natural product.

| position | $^1\text{H}$ & ppm (J)            |                                   |                     | $^{13}\text{C}$ & ppm |                    |                     |
|----------|-----------------------------------|-----------------------------------|---------------------|-----------------------|--------------------|---------------------|
|          | reported (500M)                   | synthesized (400M)                | error (rep. - syn.) | reported (125M)       | synthesized (100M) | error (rep. - syn.) |
| 1        | -                                 | -                                 | -                   | 177.4                 | 177.6              | -0.2                |
| 2        | -                                 | -                                 | -                   | 45.5                  | 45.6               | -0.1                |
| 3        | -                                 | -                                 | -                   | 213.4                 | 213.5              | -0.1                |
| 4        | -                                 | -                                 | -                   | 55.6                  | 55.8               | -0.2                |
| 5        | -                                 | -                                 | -                   | 194.4                 | 194.5              | -0.1                |
| 6        | -                                 | -                                 | -                   | 112.1                 | 112.2              | -0.1                |
| 7        | 3.64 (d, $J = 9.5$ Hz, 1H)        | 3.64 (d, $J = 9.4$ Hz, 1H)        | 0                   | 48.6                  | 48.7               | -0.1                |
| 8        | -                                 | -                                 | -                   | 127.1                 | 127.3              | -0.2                |
| 9        | 2.11 (sept, $J = 6.8$ Hz, 1H)     | 2.12 (m, 1H)                      | -0.01               | 35.2                  | 35.4               | -0.2                |
| 10       | 0.96 (d, $J = 6.8$ Hz, 3H)        | 0.96 (d, $J = 6.8$ Hz, 3H)        | 0                   | 16.3                  | 16.5               | -0.2                |
| 11       | 0.92 (d, $J = 6.8$ Hz, 3H)        | 0.91 (d, $J = 6.8$ Hz, 3H)        | 0.01                | 16.4                  | 16.5               | -0.1                |
| 12       | 1.43 (s, 3H)                      | 1.43 (s, 3H)                      | 0                   | 23.9                  | 24.0               | -0.1                |
| 13       | 1.39 (s, 3H)                      | 1.39 (s, 3H)                      | 0                   | 24.3                  | 24.5               | -0.2                |
| 14       | 1.33 (s, 3H)                      | 1.33 (s, 3H)                      | 0                   | 23.0                  | 23.1               | -0.1                |
| 15       | 1.40 (s, 3H)                      | 1.40 (s, 3H)                      | 0                   | 26.2                  | 26.3               | -0.1                |
| 1'       | 1.48 (m, 1H)                      | 1.48 (m, 1H)                      | 0                   | 59.9                  | 60.1               | -0.2                |
| 2'a      | 1.57 (m, 1H)                      | 1.56 (m, 1H)                      | 0.01                | 23.4                  | 23.4               | 0                   |
| 2'b      | 1.34 (m, 1H)                      | 1.34 (m, 1H)                      | 0                   |                       |                    |                     |
| 3'a      | 1.97 (dd, $J = 13.9, 9.5$ Hz, 1H) | 1.97 (dd, $J = 13.9, 9.7$ Hz, 1H) | 0                   | 44.5                  | 44.6               | -0.1                |
| 3'b      | 1.44 (m, 1H)                      | 1.44 (m, 1H)                      | 0                   |                       |                    |                     |
| 4'       | -                                 | -                                 | -                   | 88.6                  | 88.8               | -0.2                |
| 5'       | 2.05 (m, 1H)                      | 2.05 (m, 1H)                      | 0                   | 45.0                  | 45.2               | -0.2                |
| 6'       | 1.25 (m, 2H)                      | 1.25 (m, 2H)                      | 0                   | 29.6                  | 29.9               | -0.3                |
| 7'a      | 2.61 (m, 1H)                      | 2.61 (m, 1H)                      | 0                   | 36.9                  | 37.0               | -0.1                |
| 7'b      | 2.09 (m, 1H)                      | 2.08 (m, 1H)                      | 0.01                |                       |                    |                     |
| 8'       | -                                 | -                                 | -                   | 152.3                 | 152.4              | -0.1                |
| 9'       | 2.40 (q, $J = 9.0$ Hz, 1H)        | 2.40 (m, 1H)                      | 0                   | 42.3                  | 42.4               | -0.1                |
| 10'a     | 1.79 (t, $J = 10.5$ Hz, 1H)       | 1.79 (t, $J = 10.5$ Hz, 1H)       | 0                   | 36.2                  | 36.4               | -0.2                |
| 10'b     | 1.59 (dd, $J = 10.5, 7.8$ Hz, 1H) | 1.59 (dd, $J = 10.5, 7.8$ Hz, 1H) | 0                   |                       |                    |                     |
| 11'      | -                                 | -                                 | -                   | 34.4                  | 34.5               | -0.1                |
| 12'      | 0.97 (s, 3H)                      | 0.97 (s, 3H)                      | 0                   | 21.9                  | 22.1               | -0.2                |
| 13'      | 0.99 (s, 3H)                      | 0.99 (s, 3H)                      | 0                   | 29.8                  | 29.9               | -0.1                |
| 14'      | 1.11 (s, 3H)                      | 1.11 (s, 3H)                      | 0                   | 21.9                  | 22.1               | -0.2                |
| 15'      | 5.02 (brs, 2H)                    | 5.02 (s, 2H)                      | 0                   | 110.9                 | 111.1              | -0.2                |

## 5.5 Syntheses of 1–2 and 16–17 through path B

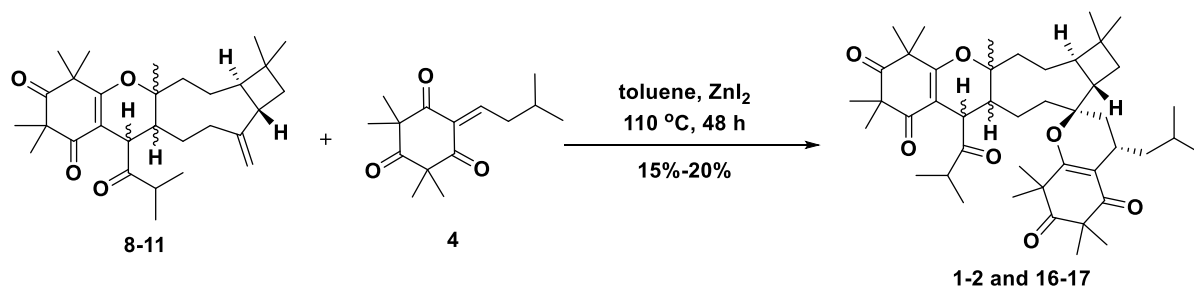

Compound **4** (53.5 mg, 0.21 mmol) and  $\text{ZnI}_2$  (8.3 mg, 0.026 mmol) in a toluene solution (2 ml) was added **8–11** (20 mg, 0.043 mmol) under reflux at 110 °C. After 48 h, the reaction was quenched with brine and extracted with ethyl acetate. Then the combined organic layers were dried over  $\text{Na}_2\text{SO}_4$ , filtered and concentrated *in vacuo*. The crude residue was further purified by preparative HPLC ( $\text{CH}_3\text{CN}-\text{H}_2\text{O}$ , 95:5) to afford corresponding products **1–2** and **16–17**.

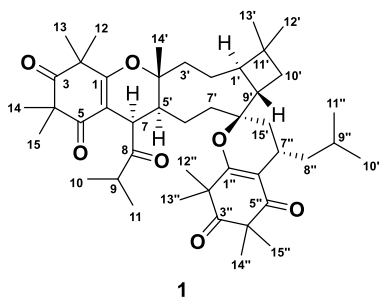

Compound **1**: 6.2 mg, 20% yield, yellow oil;

$R_f = 0.69$  (petroleum ether/ethyl acetate, 4/1);

$[\alpha]_D^{25} = +106.8^\circ$  (*c* 0.6, MeOH);

**IR** (KBr)  $\nu_{\text{max}}$ : 2960, 2865, 1708, 1637, 1468, 1375, 1362, 1208, 1156, 863, 752  $\text{cm}^{-1}$ ;

**ECD** ( $\text{CH}_3\text{OH}$ ):  $\lambda_{\text{max}}(\Delta\epsilon)$  207 (−15.0), 273 (+68.1) nm;

**$^1\text{H}$  NMR** (400 MHz,  $\text{CDCl}_3$ )  $\delta$  4.07 (d,  $J = 7.2$  Hz, 1H), 2.90 (m, 1H), 2.84 (m, 1H), 2.37 (m, 1H), 2.18 (m, 1H), 2.16 (m, 1H), 2.15 (m, 1H), 2.11 (m, 1H), 1.92 (m, 1H), 1.87 (m, 1H), 1.81 (m, 1H), 1.77 (m, 1H), 1.73 (m, 1H), 1.71 (m, 1H), 1.68 (m, 1H), 1.65 (m, 1H), 1.62 (m, 1H), 1.55 (m, 1H), 1.48 (m, 1H), 1.43 (s, 3H), 1.39 (m, 1H), 1.37 (s, 3H), 1.36 (s, 3H), 1.35 (s, 3H), 1.33 (s, 3H), 1.32 (s, 3H), 1.31 (s, 3H), 1.30 (s, 3H), 1.26 (s, 3H), 1.25 (d,  $J = 6.8$  Hz, 3H), 1.07 (d,  $J = 6.8$  Hz, 3H), 1.03 (m, 1H), 0.98 (d,  $J = 6.6$  Hz, 3H), 0.97 (s, 3H), 0.94 (s, 3H), 0.92 (d,  $J = 6.6$  Hz, 3H);

**$^{13}\text{C}$  NMR** (100 MHz,  $\text{CDCl}_3$ )  $\delta$  216.1, 213.1, 213.0, 198.1, 197.2, 171.4, 168.8, 112.5, 108.3, 84.3, 83.3, 55.5, 55.4, 48.7, 48.2, 48.0, 45.2, 44.8, 43.6, 43.1, 42.9, 40.8, 39.5, 35.7, 34.1, 33.8, 30.1, 26.8, 26.1, 26.0, 25.9, 25.6, 25.5, 24.9, 24.4, 24.1, 23.4, 22.9, 22.4, 21.9, 21.5, 21.2, 21.0, 20.4, 18.3;

**HRMS** (ESI) calcd for  $\text{C}_{45}\text{H}_{67}\text{O}_7$   $[\text{M}+\text{H}]^+$  Exact Mass: 719.4881; found: 719.4880.

**Table S32.** NMR data (CDCl<sub>3</sub>) comparison between synthetic **1** through path B and the isolated natural product.

| position | <sup>1</sup> H & ppm (J) |                          |                     | <sup>13</sup> C & ppm |                    |                     |
|----------|--------------------------|--------------------------|---------------------|-----------------------|--------------------|---------------------|
|          | isolated (300M)          | synthesized (400M)       | error (iso. - syn.) | isolated (75M)        | synthesized (100M) | error (iso. - syn.) |
| 1        | -                        | -                        | -                   | 171.3                 | 171.4              | -0.1                |
| 2        | -                        | -                        | -                   | 48.0                  | 48.0               | 0                   |
| 3        | -                        | -                        | -                   | 213.1                 | 213.1              | 0                   |
| 4        | -                        | -                        | -                   | 55.5                  | 55.5               | 0                   |
| 5        | -                        | -                        | -                   | 197.2                 | 197.2              | 0                   |
| 6        | -                        | -                        | -                   | 108.4                 | 108.3              | 0.1                 |
| 7        | 4.07 (d, J = 7.2 Hz, 1H) | 4.07 (d, J = 7.2 Hz, 1H) | 0                   | 45.2                  | 45.2               | 0                   |
| 8        | -                        | -                        | -                   | 216.0                 | 216.1              | -0.1                |
| 9        | 2.89 (m, 1H)             | 2.90 (m, 1H)             | -0.01               | 42.9                  | 42.9               | 0                   |
| 10       | 1.24 (d, J = 6.8 Hz, 3H) | 1.25 (d, J = 6.8 Hz, 3H) | -0.01               | 20.4                  | 20.4               | 0                   |
| 11       | 1.07 (d, J = 6.8 Hz, 3H) | 1.07 (d, J = 6.8 Hz, 3H) | 0                   | 18.3                  | 18.3               | 0                   |
| 12       | 1.37 (s, 3H)             | 1.37 (s, 3H)             | 0                   | 24.5                  | 24.4               | 0.1                 |
| 13       | 1.42 (s, 3H)             | 1.43 (s, 3H)             | -0.01               | 25.6                  | 25.6               | 0                   |
| 14       | 1.34 (s, 3H)             | 1.35 (s, 3H)             | -0.01               | 26.7                  | 26.8               | -0.1                |
| 15       | 1.29 (s, 3H)             | 1.30 (s, 3H)             | -0.01               | 26.0                  | 26.1               | -0.1                |
| 1'       | 1.82 (m, 1H)             | 1.81 (m, 1H)             | 0.01                | 48.7                  | 48.7               | 0                   |
| 2'a      | 1.70 (m, 1H)             | 1.71 (m, 1H)             | -0.01               | 23.4                  | 23.4               | 0                   |
| 2'b      | 1.40 (m, 1H)             | 1.39 (m, 1H)             | 0.01                | -                     | -                  | -                   |
| 3'a      | 2.18 (m, 1H)             | 2.18 (m, 1H)             | 0                   | 40.8                  | 40.8               | 0                   |
| 3'b      | 1.73 (m, 1H)             | 1.73 (m, 1H)             | 0                   | -                     | -                  | -                   |
| 4'       | -                        | -                        | -                   | 84.3                  | 84.3               | 0                   |
| 5'       | 2.15 (m, 1H)             | 2.15 (m, 1H)             | 0                   | 43.2                  | 43.1               | 0.1                 |
| 6'a      | 1.87 (m, 1H)             | 1.87 (m, 1H)             | 0                   | 21.5                  | 21.5               | 0                   |
| 6'b      | 1.78 (m, 1H)             | 1.77 (m, 1H)             | 0.01                | -                     | -                  | -                   |
| 7'a      | 2.11 (m, 1H)             | 2.11 (m, 1H)             | 0                   | 39.5                  | 39.5               | 0                   |
| 7'b      | 1.91 (m, 1H)             | 1.92 (m, 1H)             | -0.01               | -                     | -                  | -                   |
| 8'       | -                        | -                        | -                   | 83.3                  | 83.3               | 0                   |
| 9'       | 2.38 (m, 1H)             | 2.37 (m, 1H)             | 0.01                | 44.8                  | 44.8               | 0                   |
| 10'a     | 1.63 (m, 1H)             | 1.62 (m, 1H)             | 0.01                | 35.7                  | 35.7               | 0                   |
| 10'b     | 1.48 (m, 1H)             | 1.48 (m, 1H)             | 0                   | -                     | -                  | -                   |
| 11'      | -                        | -                        | -                   | 34.1                  | 34.1               | 0                   |
| 12'      | 0.94 (s, 3H)             | 0.94 (s, 3H)             | 0                   | 22.4                  | 22.4               | 0                   |
| 13'      | 0.97 (s, 3H)             | 0.97 (s, 3H)             | 0                   | 30.1                  | 30.1               | 0                   |
| 14'      | 1.26 (s, 3H)             | 1.26 (s, 3H)             | 0                   | 21.0                  | 21.0               | 0                   |
| 15'a     | 2.16 (m, 1H)             | 2.16 (m, 1H)             | 0                   | 33.8                  | 33.8               | 0                   |
| 15'b     | 1.55 (m, 1H)             | 1.55 (m, 1H)             | 0                   | -                     | -                  | -                   |
| 1''      | -                        | -                        | -                   | 168.8                 | 168.8              | 0                   |
| 2''      | -                        | -                        | -                   | 48.2                  | 48.2               | 0                   |
| 3''      | -                        | -                        | -                   | 213.0                 | 213.0              | 0                   |
| 4''      | -                        | -                        | -                   | 55.4                  | 55.4               | 0                   |
| 5''      | -                        | -                        | -                   | 198.0                 | 198.1              | -0.1                |
| 6''      | -                        | -                        | -                   | 112.6                 | 112.5              | 0.1                 |
| 7''      | 2.85 (m, 1H)             | 2.84 (m, 1H)             | 0.01                | 25.6                  | 25.5               | 0.1                 |
| 8''a     | 1.64 (m, 1H)             | 1.65 (m, 1H)             | -0.01               | 43.7                  | 43.6               | 0.1                 |
| 8''b     | 1.03 (m, 1H)             | 1.03 (m, 1H)             | 0                   | -                     | -                  | -                   |
| 9''      | 1.69 (m, 1H)             | 1.68 (m, 1H)             | 0.01                | 25.9                  | 25.9               | 0                   |
| 10''     | 0.92 (d, J = 6.0 Hz, 3H) | 0.92 (d, J = 6.6 Hz, 3H) | 0                   | 24.1                  | 24.1               | 0                   |
| 11''     | 0.98 (d, J = 6.0 Hz, 3H) | 0.98 (d, J = 6.6 Hz, 3H) | 0                   | 21.3                  | 21.2               | 0.1                 |
| 12''     | 1.36 (s, 3H)             | 1.36 (s, 3H)             | 0                   | 24.9                  | 24.9               | 0                   |
| 13''     | 1.31 (s, 3H)             | 1.32 (s, 3H)             | -0.01               | 21.9                  | 21.9               | 0                   |
| 14''     | 1.31 (s, 3H)             | 1.31 (s, 3H)             | 0                   | 22.9                  | 22.9               | 0                   |
| 15''     | 1.32 (s, 3H)             | 1.33 (s, 3H)             | -0.01               | 26.0                  | 26.1               | -0.1                |

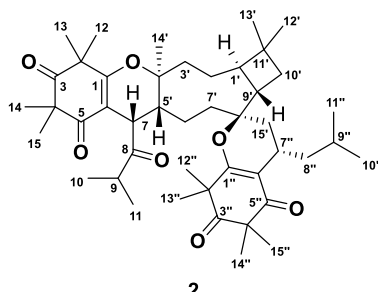

Compound **2**: 5.6 mg, 18% yield, yellow oil;

$R_f$  = 0.69 (petroleum ether/ethyl acetate, 4/1);

$[\alpha]_D^{25} = -37.6^\circ$  (*c* 0.6, MeOH);

**IR** (KBr)  $\nu_{\max}$ : 2952, 2926, 2868, 1715, 1650, 1625, 1465, 1386, 1360, 1206, 1154, 823, 760 cm<sup>-1</sup>;

**ECD** (CH<sub>3</sub>OH):  $\lambda_{\max}$  ( $\Delta\epsilon$ ) 208 (+19.9), 251 (-21.7), 274 (+8.0), 304 (-11.4) nm;

**<sup>1</sup>H NMR** (400 MHz, CDCl<sub>3</sub>) δ 4.22 (d, *J* = 7.2 Hz, 1H), 2.95 (m, 1H), 2.70 (m, 1H), 2.59 (m, 1H), 2.28 (m, 1H), 2.20 (m, 1H), 2.10 (m, 1H), 1.99 (m, 1H), 1.88 (m, 1H), 1.74 (m, 1H), 1.73 (m, 1H), 1.72 (m, 1H), 1.70 (m, 1H), 1.60 (m, 1H), 1.53 (m, 1H), 1.49 (m, 1H), 1.44 (s, 3H), 1.39 (s, 3H), 1.38 (m, 1H), 1.37 (s, 3H), 1.37 (s, 3H), 1.36 (s, 3H), 1.33 (s, 3H), 1.32 (d, *J* = 6.6 Hz, 3H), 1.31 (s, 3H), 1.29 (s, 3H), 1.28 (m, 1H), 1.26 (m, 2H), 1.14 (m, 3H), 1.10 (m, 1H), 1.03 (d, *J* = 6.6 Hz, 3H), 1.03 (d, *J* = 6.4 Hz, 3H), 0.97 (s, 3H), 0.95 (s, 3H), 0.90 (d, *J* = 6.4 Hz, 3H);

**<sup>13</sup>C NMR** (100 MHz, CDCl<sub>3</sub>) δ 216.4, 213.3, 213.0, 197.9, 197.5, 171.8, 169.9, 110.6, 107.8, 83.4, 82.8, 55.5, 55.5, 48.6, 48.1, 47.9, 47.4, 42.6, 42.5, 42.4, 40.7, 40.6, 36.7, 34.6, 34.0, 29.9, 29.3, 27.3, 26.5, 26.0, 25.5, 25.5, 25.3, 25.1, 24.9, 24.1, 23.5, 23.0, 22.9, 22.7, 21.3, 21.2, 21.0, 20.8, 17.4;

**HRMS** (ESI) calcd for C<sub>45</sub>H<sub>67</sub>O<sub>7</sub> [M+H]<sup>+</sup> Exact Mass: 719.4881; found: 719.4885.

**Table S33.** NMR data (CDCl<sub>3</sub>) comparison between synthetic **2** through path B and the isolated natural product.

| position | <sup>1</sup> H & ppm ( <i>J</i> ) |                                 |                     | <sup>13</sup> C & ppm |                    |                     |
|----------|-----------------------------------|---------------------------------|---------------------|-----------------------|--------------------|---------------------|
|          | isolated (500M)                   | synthesized (400M)              | error (iso. - syn.) | isolated (125M)       | synthesized (100M) | error (iso. - syn.) |
| 1        | -                                 | -                               | -                   | 171.7                 | 171.8              | -0.1                |
| 2        | -                                 | -                               | -                   | 48.0                  | 47.9               | 0.1                 |
| 3        | -                                 | -                               | -                   | 212.9                 | 213.0              | -0.1                |
| 4        | -                                 | -                               | -                   | 55.5                  | 55.5               | 0                   |
| 5        | -                                 | -                               | -                   | 197.4                 | 197.5              | -0.1                |
| 6        | -                                 | -                               | -                   | 107.9                 | 107.8              | 0.1                 |
| 7        | 4.22 (d, <i>J</i> = 7.0 Hz, 1H)   | 4.22 (d, <i>J</i> = 7.8 Hz, 1H) | 0                   | 42.6                  | 42.5               | 0.1                 |
| 8        | -                                 | -                               | -                   | 216.3                 | 216.4              | -0.1                |
| 9        | 2.71 (m, 1H)                      | 2.70 (m, 1H)                    | 0.01                | 42.7                  | 42.6               | 0.1                 |
| 10       | 1.32 (d, <i>J</i> = 6.5 Hz, 3H)   | 1.32 (d, <i>J</i> = 6.6 Hz, 3H) | 0                   | 21.3                  | 21.3               | 0                   |
| 11       | 1.03 (d, <i>J</i> = 6.5 Hz, 3H)   | 1.03 (d, <i>J</i> = 6.6 Hz, 3H) | 0                   | 17.4                  | 17.4               | 0                   |
| 12       | 1.37 (s, 3H)                      | 1.37 (s, 3H)                    | 0                   | 25.2                  | 25.1               | 0.1                 |
| 13       | 1.44 (s, 3H)                      | 1.44 (s, 3H)                    | 0                   | 25.5                  | 25.5               | 0                   |
| 14       | 1.36 (s, 3H)                      | 1.36 (s, 3H)                    | 0                   | 27.3                  | 27.3               | 0                   |
| 15       | 1.31 (s, 3H)                      | 1.31 (s, 3H)                    | 0                   | 20.8                  | 20.8               | 0                   |
| 1'       | 1.74 (m, 1H)                      | 1.74 (m, 1H)                    | 0                   | 48.6                  | 48.6               | 0                   |
| 2'a      | 1.53 (m, 1H)                      | 1.53 (m, 1H)                    | 0                   | 23.0                  | 23.0               | 0                   |
| 2'b      | 1.25 (m, 1H)                      | 1.26 (m, 1H)                    | -0.01               | -                     | -                  | -                   |
| 3'a      | 2.11 (m, 1H)                      | 2.10 (m, 1H)                    | 0.01                | 40.7                  | 40.7               | 0                   |
| 3'b      | 1.73 (m, 1H)                      | 1.73 (m, 1H)                    | 0                   | -                     | -                  | -                   |
| 4'       | -                                 | -                               | -                   | 83.4                  | 83.4               | 0                   |
| 5'       | 2.21 (m, 1H)                      | 2.20 (m, 1H)                    | 0.01                | 40.6                  | 40.6               | 0                   |
| 6'a      | 1.28 (m, 1H)                      | 1.28 (m, 1H)                    | 0                   | 29.9                  | 29.9               | 0                   |
| 6'b      | 1.25 (m, 1H)                      | 1.26 (m, 1H)                    | -0.01               | -                     | -                  | -                   |
| 7'a      | 2.27 (m, 1H)                      | 2.28 (m, 1H)                    | -0.01               | 36.7                  | 36.7               | 0                   |
| 7'b      | 1.72 (m, 1H)                      | 1.72 (m, 1H)                    | 0                   | -                     | -                  | -                   |
| 8'       | -                                 | -                               | -                   | 82.8                  | 82.8               | 0                   |
| 9'       | 2.58 (m, 1H)                      | 2.59 (m, 1H)                    | -0.01               | 47.5                  | 47.4               | 0.1                 |
| 10'a     | 1.60 (m, 1H)                      | 1.60 (m, 1H)                    | 0                   | 34.6                  | 34.6               | 0                   |
| 10'b     | 1.39 (m, 1H)                      | 1.38 (m, 1H)                    | 0.01                | -                     | -                  | -                   |
| 11'      | -                                 | -                               | -                   | 34.0                  | 34.0               | 0                   |
| 12'      | 0.95 (s, 3H)                      | 0.95 (s, 3H)                    | 0                   | 22.9                  | 22.9               | 0                   |
| 13'      | 0.97 (s, 3H)                      | 0.97 (s, 3H)                    | 0                   | 29.3                  | 29.3               | 0                   |
| 14'      | 1.14 (s, 3H)                      | 1.14 (s, 3H)                    | 0                   | 21.0                  | 21.0               | 0                   |
| 15'a     | 1.98 (m, 1H)                      | 1.99 (m, 1H)                    | -0.01               | 23.6                  | 23.5               | 0.1                 |
| 15'b     | 1.89 (m, 1H)                      | 1.88 (m, 1H)                    | 0.01                | -                     | -                  | -                   |
| 1''      | -                                 | -                               | -                   | 169.8                 | 169.9              | -0.1                |
| 2''      | -                                 | -                               | -                   | 48.1                  | 48.1               | 0                   |
| 3''      | -                                 | -                               | -                   | 213.3                 | 213.3              | 0                   |
| 4''      | -                                 | -                               | -                   | 55.5                  | 55.5               | 0                   |
| 5''      | -                                 | -                               | -                   | 197.9                 | 197.9              | 0                   |
| 6''      | -                                 | -                               | -                   | 110.7                 | 110.6              | 0.1                 |
| 7''      | 2.95 (m, 1H)                      | 2.95 (m, 1H)                    | 0                   | 25.3                  | 25.3               | 0                   |
| 8''a     | 1.49 (m, 1H)                      | 1.49 (m, 1H)                    | 0                   | 42.5                  | 42.4               | 0.1                 |
| 8''b     | 1.10 (m, 1H)                      | 1.10 (m, 1H)                    | 0                   | -                     | -                  | -                   |
| 9''      | 1.70 (m, 1H)                      | 1.70 (m, 1H)                    | 0                   | 26.1                  | 26.0               | 0.1                 |
| 10''     | 0.91 (d, <i>J</i> = 6.2 Hz, 3H)   | 0.90 (d, <i>J</i> = 6.4 Hz, 3H) | 0.01                | 24.1                  | 24.1               | 0                   |
| 11''     | 1.03 (d, <i>J</i> = 6.2 Hz, 3H)   | 1.03 (d, <i>J</i> = 6.4 Hz, 3H) | 0                   | 21.3                  | 21.2               | 0.1                 |
| 12''     | 1.39 (s, 3H)                      | 1.39 (s, 3H)                    | 0                   | 24.9                  | 24.9               | 0                   |
| 13''     | 1.30 (s, 3H)                      | 1.29 (s, 3H)                    | 0.01                | 25.5                  | 25.5               | 0                   |
| 14''     | 1.33 (s, 3H)                      | 1.33 (s, 3H)                    | 0                   | 22.7                  | 22.7               | 0                   |
| 15''     | 1.36 (s, 3H)                      | 1.37 (s, 3H)                    | -0.01               | 26.5                  | 26.5               | 0                   |



Compound **16**: 5.2 mg, 17% yield, yellow oil;

$R_f = 0.62$  (petroleum ether/ethyl acetate, 4/1);

$[\alpha]_D^{25} = +60.5^\circ$  ( $c$  1.0, MeOH);

**IR** (KBr)  $\nu_{\max}$ : 2945, 2868, 1715, 1650, 1465, 1380, 1205, 1183, 872  $\text{cm}^{-1}$ ;

**$^1\text{H}$  NMR** (400 MHz,  $\text{CDCl}_3$ )  $\delta$  3.39 (d,  $J = 11.6$  Hz, 1H), 2.92 (m, 1H), 2.63 (m, 1H), 2.23 (m, 1H), 2.19 (m, 1H), 2.10 (m, 1H), 2.08 (m, 1H), 2.03 (m, 1H), 1.88 (m, 1H), 1.85 (m, 1H), 1.78 (m, 1H), 1.76 (m, 1H), 1.69 (m, 1H), 1.67 (m, 1H), 1.64 (m, 1H), 1.52 (m, 1H), 1.45 (s, 3H), 1.39 (s, 3H), 1.38 (m, 1H), 1.35 (s, 3H), 1.34 (s, 3H), 1.34 (s, 3H), 1.31 (s, 3H), 1.28 (s, 3H), 1.27 (s, 3H), 1.26 (d,  $J = 6.8$  Hz, 3H), 1.25 (m, 2H), 1.22 (m, 1H), 1.16 (s, 3H), 1.13 (d,  $J = 6.8$  Hz, 3H), 0.99 (s, 3H), 0.92 (s, 3H), 0.92 (d,  $J = 6.0$  Hz, 3H), 0.87 (d,  $J = 6.0$  Hz, 3H), 0.80 (m, 1H);

**$^{13}\text{C}$  NMR** (100 MHz,  $\text{CDCl}_3$ )  $\delta$  216.5, 212.9, 212.8, 198.5, 197.4, 171.9, 167.4, 114.0, 110.1, 83.3, 83.1, 55.2, 55.1, 49.2, 49.1, 48.5, 48.0, 43.7, 42.8, 42.6, 41.3, 38.8, 38.3, 36.2, 35.8, 33.8, 30.0, 29.9, 26.7, 26.2, 25.9, 25.5, 25.5, 24.9, 24.8, 24.2, 23.9, 23.4, 22.6, 21.7, 21.4, 20.9, 20.7, 19.9, 19.2;

**HRMS** (ESI) calcd for  $\text{C}_{45}\text{H}_{67}\text{O}_7$   $[\text{M}+\text{H}]^+$  Exact Mass: 719.4881; found: 719.4883.

**Table S34.** NMR data (CDCl<sub>3</sub>) comparison between synthetic **16** through path A and path B.

| position | <sup>1</sup> H & ppm (J)  |                           |       | <sup>13</sup> C & ppm |                       |       |
|----------|---------------------------|---------------------------|-------|-----------------------|-----------------------|-------|
|          | 16 (path A)<br>(400M)     | 16 (path B)<br>(400M)     | error | 16 (path A)<br>(100M) | 16 (path B)<br>(100M) | error |
| 1        | -                         | -                         | -     | 171.9                 | 171.9                 | 0     |
| 2        | -                         | -                         | -     | 48.0                  | 48.0                  | 0     |
| 3        | -                         | -                         | -     | 212.9                 | 212.9                 | 0     |
| 4        | -                         | -                         | -     | 55.1                  | 55.1                  | 0     |
| 5        | -                         | -                         | -     | 197.4                 | 197.4                 | 0     |
| 6        | -                         | -                         | -     | 110.1                 | 110.1                 | 0     |
| 7        | 3.39 (d, J = 11.2 Hz, 1H) | 3.39 (d, J = 11.6 Hz, 1H) | 0     | 49.2                  | 49.2                  | 0     |
| 8        | -                         | -                         | -     | 216.5                 | 216.5                 | 0     |
| 9        | 2.93 (m, 1H)              | 2.92 (m, 1H)              | 0.01  | 41.3                  | 41.3                  | 0     |
| 10       | 1.26 (d, J = 7.0 Hz, 3H)  | 1.26 (d, J = 6.8 Hz, 3H)  | 0     | 20.7                  | 20.7                  | 0     |
| 11       | 1.13 (d, J = 7.0 Hz, 3H)  | 1.13 (d, J = 6.8 Hz, 3H)  | 0     | 19.2                  | 19.2                  | 0     |
| 12       | 1.35 (s, 3H)              | 1.35 (s, 3H)              | 0     | 25.6                  | 25.5                  | 0.1   |
| 13       | 1.45 (s, 3H)              | 1.45 (s, 3H)              | 0     | 24.8                  | 24.8                  | 0     |
| 14       | 1.31 (s, 3H)              | 1.31 (s, 3H)              | 0     | 22.6                  | 22.6                  | 0     |
| 15       | 1.28 (s, 3H)              | 1.27 (s, 3H)              | 0.01  | 23.9                  | 23.9                  | 0     |
| 1'       | 2.02 (m, 1H)              | 2.03 (m, 1H)              | -0.01 | 49.1                  | 49.1                  | 0     |
| 2'       | 1.25 (m, 2H)              | 1.25 (m, 2H)              | 0     | 29.9                  | 29.9                  | 0     |
| 3'a      | 2.19 (m, 1H)              | 2.19 (m, 1H)              | 0     | 35.7                  | 35.8                  | -0.1  |
| 3'b      | 1.85 (m, 1H)              | 1.85 (m, 1H)              | 0     | -                     | -                     | -     |
| 4'       | -                         | -                         | -     | 83.3                  | 83.3                  | 0     |
| 5'       | 2.23 (m, 1H)              | 2.23 (m, 1H)              | 0     | 43.8                  | 43.7                  | 0.1   |
| 6'a      | 1.78 (m, 1H)              | 1.78 (m, 1H)              | 0     | 21.4                  | 21.4                  | 0     |
| 6'b      | 1.52 (m, 1H)              | 1.52 (m, 1H)              | 0     | -                     | -                     | -     |
| 7'a      | 1.88 (m, 1H)              | 1.88 (m, 1H)              | 0     | 38.8                  | 38.8                  | 0     |
| 7'b      | 1.66 (m, 1H)              | 1.67 (m, 1H)              | -0.01 | -                     | -                     | -     |
| 8'       | -                         | -                         | -     | 83.1                  | 83.1                  | 0     |
| 9'       | 2.10 (m, 1H)              | 2.10 (m, 1H)              | 0     | 42.6                  | 42.6                  | 0     |
| 10'a     | 1.76 (m, 1H)              | 1.76 (m, 1H)              | 0     | 36.2                  | 36.2                  | 0     |
| 10'b     | 1.38 (m, 1H)              | 1.38 (m, 1H)              | 0     | -                     | -                     | -     |
| 11'      | -                         | -                         | -     | 33.8                  | 33.8                  | 0     |
| 12'      | 0.92 (s, 3H)              | 0.92 (s, 3H)              | 0     | 21.7                  | 21.7                  | 0     |
| 13'      | 0.99 (s, 3H)              | 0.99 (s, 3H)              | 0     | 30.0                  | 30.0                  | 0     |
| 14'      | 1.16 (s, 3H)              | 1.16 (s, 3H)              | 0     | 20.0                  | 19.9                  | 0.1   |
| 15'a     | 2.08 (m, 1H)              | 2.08 (m, 1H)              | 0     | 38.3                  | 38.3                  | 0     |
| 15'b     | 1.21 (m, 1H)              | 1.22 (m, 1H)              | -0.01 | -                     | -                     | -     |
| 1''      | -                         | -                         | -     | 167.4                 | 167.4                 | 0     |
| 2''      | -                         | -                         | -     | 48.5                  | 48.5                  | 0     |
| 3''      | -                         | -                         | -     | 212.8                 | 212.8                 | 0     |
| 4''      | -                         | -                         | -     | 55.2                  | 55.2                  | 0     |
| 5''      | -                         | -                         | -     | 198.5                 | 198.5                 | 0     |
| 6''      | -                         | -                         | -     | 114.0                 | 114.0                 | 0     |
| 7''      | 2.64 (m, 1H)              | 2.63 (m, 1H)              | 0.01  | 25.9                  | 25.9                  | 0     |
| 8''a     | 1.69 (m, 1H)              | 1.69 (m, 1H)              | 0     | 42.8                  | 42.8                  | 0     |
| 8''b     | 0.80 (m, 1H)              | 0.80 (m, 1H)              | 0     | -                     | -                     | -     |
| 9''      | 1.64 (m, 1H)              | 1.64 (m, 1H)              | 0     | 25.5                  | 25.5                  | 0     |
| 10''     | 0.87 (d, J = 5.8 Hz, 3H)  | 0.87 (d, J = 6.0 Hz, 3H)  | 0     | 24.2                  | 24.2                  | 0     |
| 11''     | 0.92 (d, J = 5.8 Hz, 3H)  | 0.92 (d, J = 6.0 Hz, 3H)  | 0     | 20.9                  | 20.9                  | 0     |
| 12''     | 1.35 (s, 3H)              | 1.34 (s, 3H)              | 0.01  | 26.7                  | 26.7                  | 0     |
| 13''     | 1.40 (s, 3H)              | 1.39 (s, 3H)              | 0.01  | 23.4                  | 23.4                  | 0     |
| 14''     | 1.28 (s, 3H)              | 1.28 (s, 3H)              | 0     | 26.2                  | 26.2                  | 0     |
| 15''     | 1.34 (s, 3H)              | 1.34 (s, 3H)              | 0     | 24.9                  | 24.9                  | 0     |

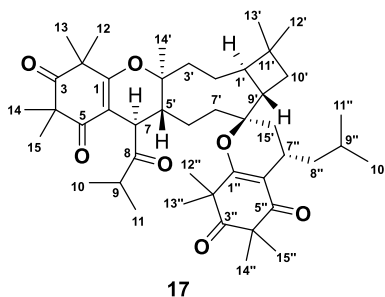

Compound **17**: 4.6 mg, 15% yield, yellow oil;

$R_f = 0.62$  (petroleum ether/ethyl acetate, 4/1);

$[\alpha]_D^{25} = +36.4^\circ$  (c 1.0, MeOH);

**IR (KBr)**  $\nu_{\max}$ : 2928, 2865, 1706, 1656, 1623, 1464, 1368, 1280, 1186, 856, 754  $\text{cm}^{-1}$ ;

**<sup>1</sup>H NMR** (400 MHz, CDCl<sub>3</sub>) δ 3.45 (d, *J* = 10.4 Hz, 1H), 2.86 (m, 1H), 2.73 (m, 1H), 2.47 (m, 1H), 2.16 (m, 1H), 2.04 (m, 1H), 2.01 (m, 1H), 1.86 (m, 2H), 1.73 (m, 1H), 1.72 (m, 1H), 1.70 (m, 1H), 1.67 (m, 1H), 1.57 (m, 1H), 1.53 (m, 2H), 1.48 (m, 1H), 1.45 (s, 3H), 1.43 (d, *J* = 7.0 Hz, 3H), 1.37 (m, 1H), 1.32 (s, 3H), 1.32 (s, 3H), 1.32 (s, 3H), 1.30 (s, 3H), 1.30 (m, 1H), 1.29 (s, 3H), 1.28 (s, 3H), 1.24 (s, 3H), 1.17 (m, 1H), 1.09 (d, *J* = 7.0 Hz, 3H), 1.06 (s, 3H), 1.06 (d, *J* = 6.6 Hz, 3H), 1.03 (m, 1H), 0.99 (s, 3H), 0.96 (s, 3H), 0.96 (d, *J* = 6.6 Hz, 3H);

**<sup>13</sup>C NMR** (100 MHz, CDCl<sub>3</sub>) δ 216.3, 213.3, 212.8, 197.9, 197.1, 171.2, 169.8, 110.2, 109.6, 82.8, 82.2, 55.7, 55.5, 48.4, 48.0, 47.8, 47.3, 46.9, 43.8, 42.0, 41.6, 38.3, 37.5, 34.6, 33.7, 29.5, 26.9, 26.3, 25.5, 25.5, 25.4, 25.2, 24.9, 24.7, 24.3, 24.0, 22.9, 22.5, 22.1, 21.9, 21.4, 21.4, 20.5, 20.0, 17.8;

**HRMS** (ESI) calcd for C<sub>45</sub>H<sub>67</sub>O<sub>7</sub> [M+H]<sup>+</sup> Exact Mass: 719.4881; found: 719.4884.

**Table S35.** NMR data (CDCl<sub>3</sub>) comparison between synthetic **17** through paths A and B.

| position | <sup>1</sup> H & ppm ( <i>J</i> ) |                                  |       | <sup>13</sup> C & ppm |                       |       |
|----------|-----------------------------------|----------------------------------|-------|-----------------------|-----------------------|-------|
|          | 17 (path A)<br>(400M)             | 17 (path B)<br>(400M)            | error | 17 (path A)<br>(100M) | 17 (path B)<br>(100M) | error |
| 1        | -                                 | -                                | -     | 171.2                 | 171.2                 | 0     |
| 2        | -                                 | -                                | -     | 47.8                  | 47.8                  | 0     |
| 3        | -                                 | -                                | -     | 212.8                 | 212.8                 | 0     |
| 4        | -                                 | -                                | -     | 55.7                  | 55.7                  | 0     |
| 5        | -                                 | -                                | -     | 197.0                 | 197.1                 | -0.1  |
| 6        | -                                 | -                                | -     | 109.7                 | 109.6                 | 0.1   |
| 7        | 3.45 (d, <i>J</i> = 10.4 Hz, 1H)  | 3.45 (d, <i>J</i> = 10.4 Hz, 1H) | 0     | 47.3                  | 47.3                  | 0     |
| 8        | -                                 | -                                | -     | 216.2                 | 216.3                 | -0.1  |
| 9        | 2.73 (m, 1H)                      | 2.73 (m, 1H)                     | 0     | 43.8                  | 43.8                  | 0     |
| 10       | 1.43 (d, <i>J</i> = 6.8 Hz, 3H)   | 1.43 (d, <i>J</i> = 7.0 Hz, 3H)  | 0     | 20.5                  | 20.5                  | 0     |
| 11       | 1.09 (d, <i>J</i> = 6.8 Hz, 3H)   | 1.09 (d, <i>J</i> = 7.0 Hz, 3H)  | 0     | 17.8                  | 17.8                  | 0     |
| 12       | 1.32 (s, 3H)                      | 1.32 (s, 3H)                     | 0     | 21.4                  | 21.4                  | 0     |
| 13       | 1.45 (s, 3H)                      | 1.45 (s, 3H)                     | 0     | 24.7                  | 24.7                  | 0     |
| 14       | 1.29 (s, 3H)                      | 1.29 (s, 3H)                     | 0     | 22.1                  | 22.1                  | 0     |
| 15       | 1.32 (s, 3H)                      | 1.32 (s, 3H)                     | 0     | 22.5                  | 22.5                  | 0     |
| 1'       | 1.72 (m, 1H)                      | 1.72 (m, 1H)                     | 0     | 48.5                  | 48.4                  | 0.1   |
| 2'       | 1.53 (m, 2H)                      | 1.53 (m, 2H)                     | 0     | 21.9                  | 21.9                  | 0     |
| 3'a      | 2.16 (m, 1H)                      | 2.16 (m, 1H)                     | 0     | 38.3                  | 38.3                  | 0     |
| 3'b      | 1.67 (m, 1H)                      | 1.67 (m, 1H)                     | 0     | -                     | -                     | -     |
| 4'       | -                                 | -                                | -     | 82.8                  | 82.8                  | 0     |
| 5'       | 2.01 (m, 1H)                      | 2.01 (m, 1H)                     | 0     | 41.6                  | 41.6                  | 0     |
| 6'a      | 1.70 (m, 1H)                      | 1.70 (m, 1H)                     | 0     | 25.5                  | 25.5                  | 0     |
| 6'b      | 1.37 (m, 1H)                      | 1.37 (m, 1H)                     | 0     | -                     | -                     | -     |
| 7'a      | 2.04 (m, 1H)                      | 2.04 (m, 1H)                     | 0     | 37.5                  | 37.5                  | 0     |
| 7'b      | 1.18 (m, 1H)                      | 1.17 (m, 1H)                     | 0.01  | -                     | -                     | -     |
| 8'       | -                                 | -                                | -     | 82.2                  | 82.2                  | 0     |
| 9'       | 2.47 (m, 1H)                      | 2.47 (m, 1H)                     | 0     | 46.9                  | 46.9                  | 0     |
| 10'a     | 1.57 (m, 1H)                      | 1.57 (m, 1H)                     | 0     | 34.6                  | 34.6                  | 0     |
| 10'b     | 1.30 (m, 1H)                      | 1.30 (m, 1H)                     | 0     | -                     | -                     | -     |
| 11'      | -                                 | -                                | -     | 33.7                  | 33.7                  | 0     |
| 12'      | 0.98 (s, 3H)                      | 0.99 (s, 3H)                     | -0.01 | 22.9                  | 22.9                  | 0     |
| 13'      | 0.96 (s, 3H)                      | 0.96 (s, 3H)                     | 0     | 29.5                  | 29.5                  | 0     |
| 14'      | 1.07 (s, 3H)                      | 1.06 (s, 3H)                     | 0.01  | 21.4                  | 21.4                  | 0     |
| 15'      | 1.86 (m, 2H)                      | 1.86 (m, 2H)                     | 0     | 24.0                  | 24.0                  | 0     |
| 1''      | -                                 | -                                | -     | 169.7                 | 169.8                 | -0.1  |
| 2''      | -                                 | -                                | -     | 47.9                  | 48.0                  | -0.1  |
| 3''      | -                                 | -                                | -     | 213.3                 | 213.3                 | 0     |
| 4''      | -                                 | -                                | -     | 55.5                  | 55.5                  | 0     |
| 5''      | -                                 | -                                | -     | 197.9                 | 197.9                 | 0     |
| 6''      | -                                 | -                                | -     | 110.3                 | 110.2                 | 0.1   |
| 7''      | 2.86 (m, 1H)                      | 2.86 (m, 1H)                     | 0     | 25.2                  | 25.2                  | 0     |
| 8''a     | 1.48 (m, 1H)                      | 1.48 (m, 1H)                     | 0     | 42.1                  | 42.0                  | 0.1   |
| 8''b     | 1.03 (m, 1H)                      | 1.03 (m, 1H)                     | 0     | -                     | -                     | -     |
| 9''      | 1.73 (m, 1H)                      | 1.73 (m, 1H)                     | 0     | 26.3                  | 26.3                  | 0     |
| 10''     | 0.96 (d, <i>J</i> = 6.8 Hz, 3H)   | 0.96 (d, <i>J</i> = 6.6 Hz, 3H)  | 0     | 24.3                  | 24.3                  | 0     |
| 11''     | 1.06 (d, <i>J</i> = 6.8 Hz, 3H)   | 1.06 (d, <i>J</i> = 6.6 Hz, 3H)  | 0     | 20.0                  | 20.0                  | 0     |
| 12''     | 1.24 (s, 3H)                      | 1.24 (s, 3H)                     | 0     | 24.9                  | 24.9                  | 0     |
| 13''     | 1.28 (s, 3H)                      | 1.28 (s, 3H)                     | 0     | 25.4                  | 25.4                  | 0     |
| 14''     | 1.30 (s, 3H)                      | 1.30 (s, 3H)                     | 0     | 25.5                  | 25.5                  | 0     |
| 15''     | 1.32 (s, 3H)                      | 1.32 (s, 3H)                     | 0     | 26.9                  | 26.9                  | 0     |



## 6. X-ray crystal structures of 7, 16, and 18

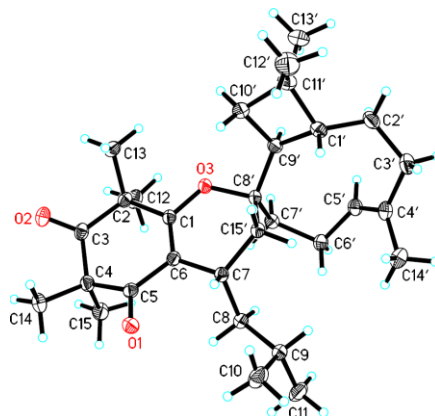

**Figure S52.** X-ray ORTEP drawing of **7** (thermal ellipsoids at the 50% probability level).

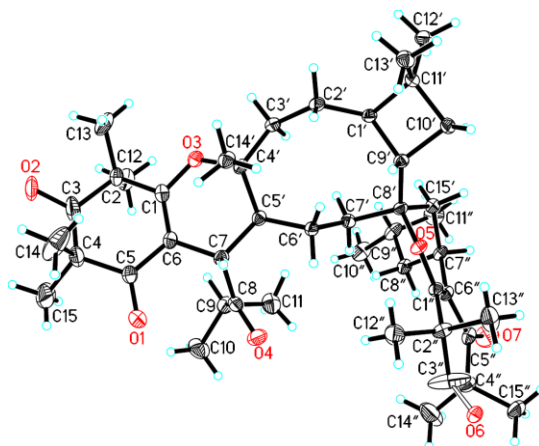

**Figure S53.** X-ray ORTEP drawing of **16** (thermal ellipsoids at the 50% probability level).

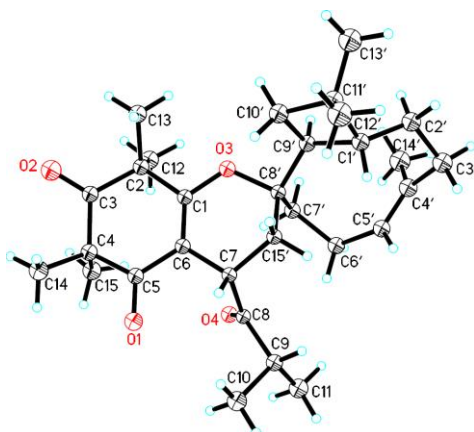

**Figure S54.** X-ray ORTEP drawing of **18** (thermal ellipsoids at the 50% probability level).

7.  $^1\text{H}$  and  $^{13}\text{C}$  NMR spectra of the synthetic compounds

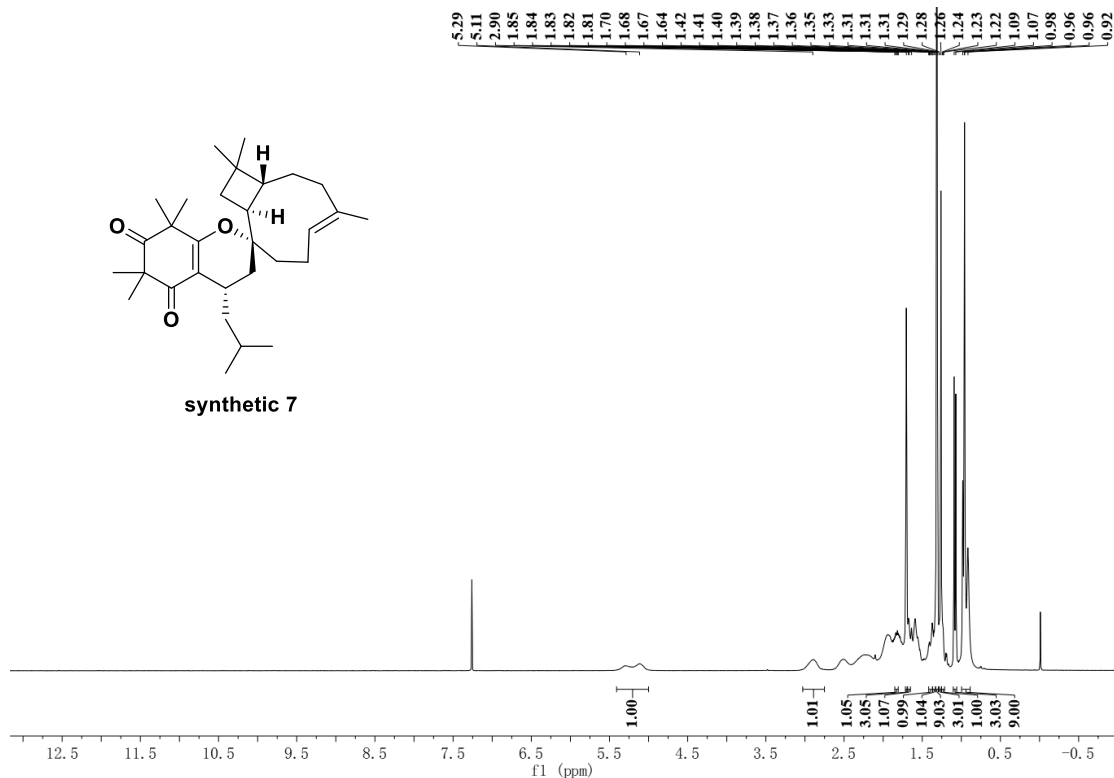

Figure S55.  $^1\text{H}$  NMR spectrum (300 MHz) of synthetic 7 in  $\text{CDCl}_3$ .

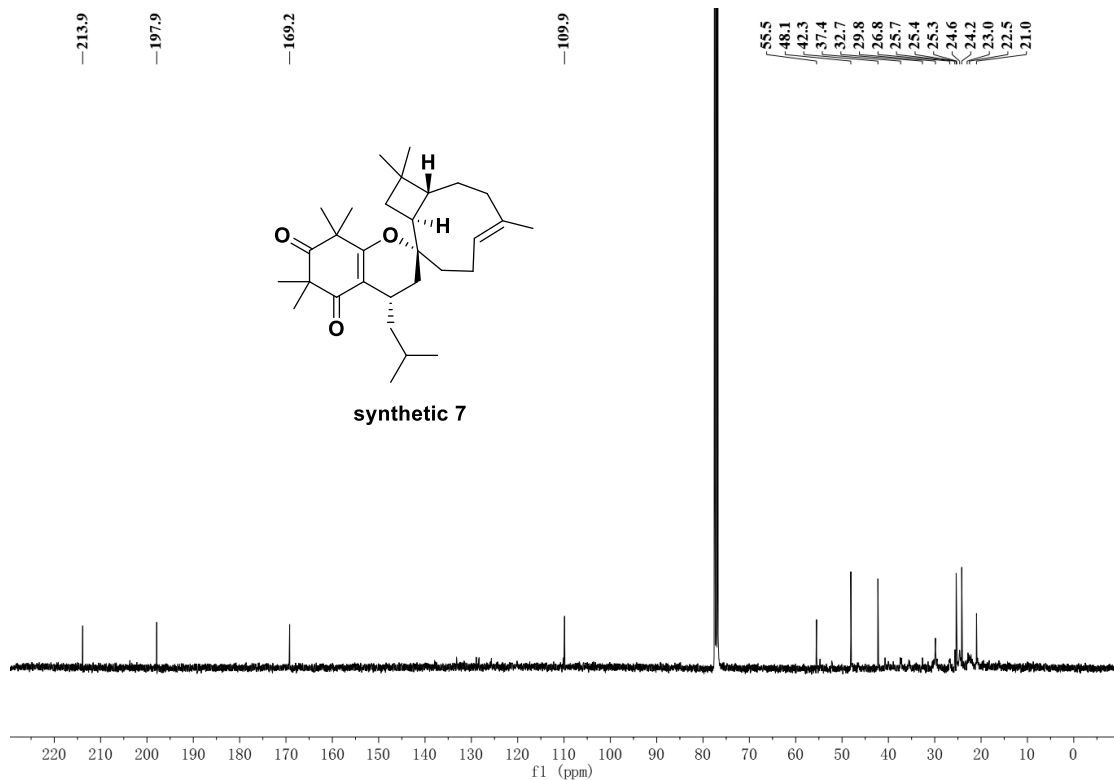

Figure S56.  $^{13}\text{C}$  NMR spectrum (75 MHz) of synthetic 7 in  $\text{CDCl}_3$ .

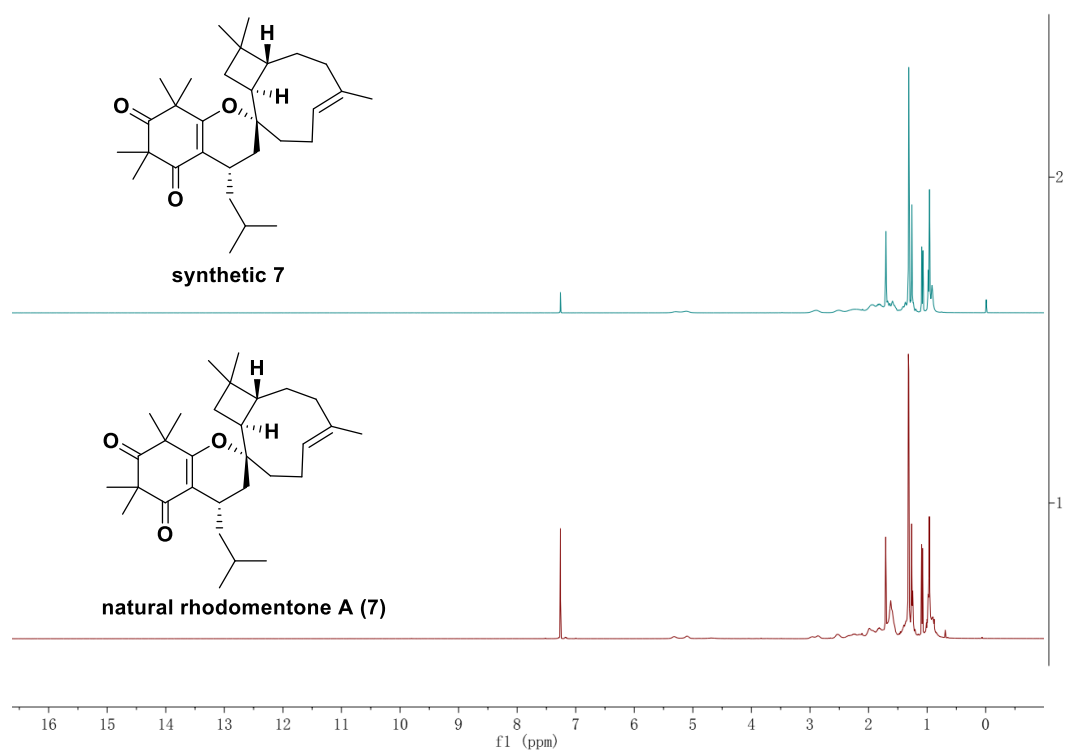

**Figure S57.** Comparison of <sup>1</sup>H NMR spectra between synthetic and natural **7**.

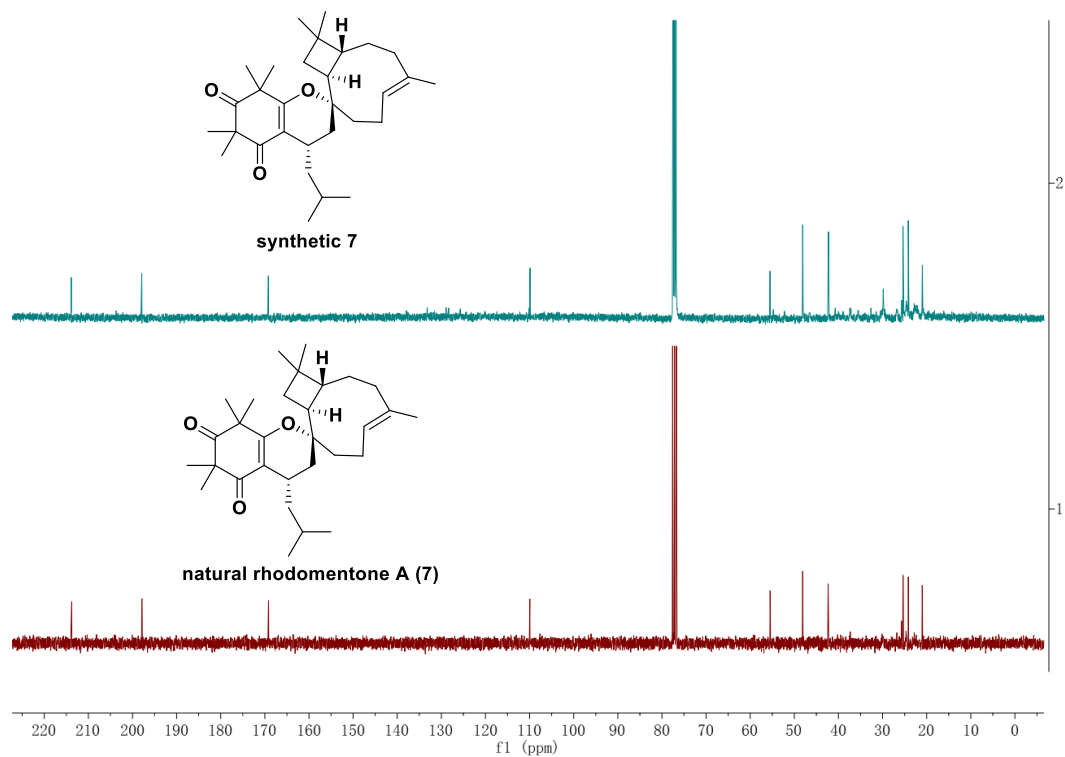

**Figure S58.** Comparison of <sup>13</sup>C NMR spectra between synthetic and natural **7**.

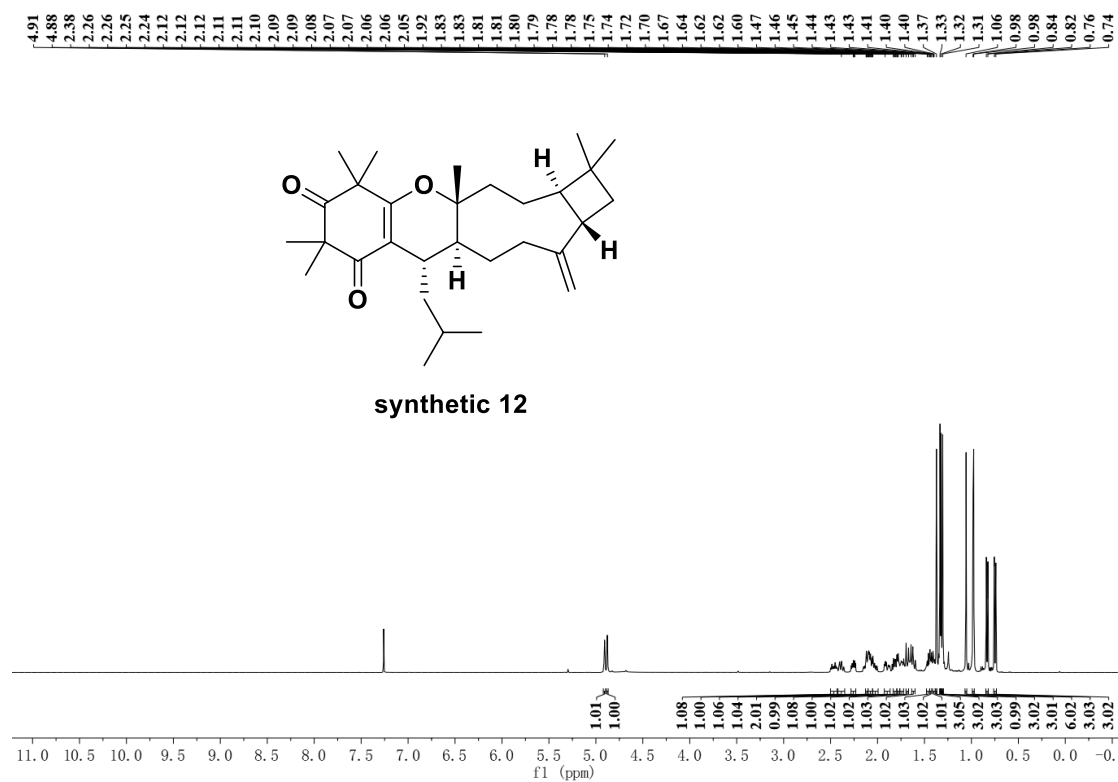

Figure S59.  $^1\text{H}$  NMR spectrum (400 MHz) of synthetic **12** in  $\text{CDCl}_3$ .

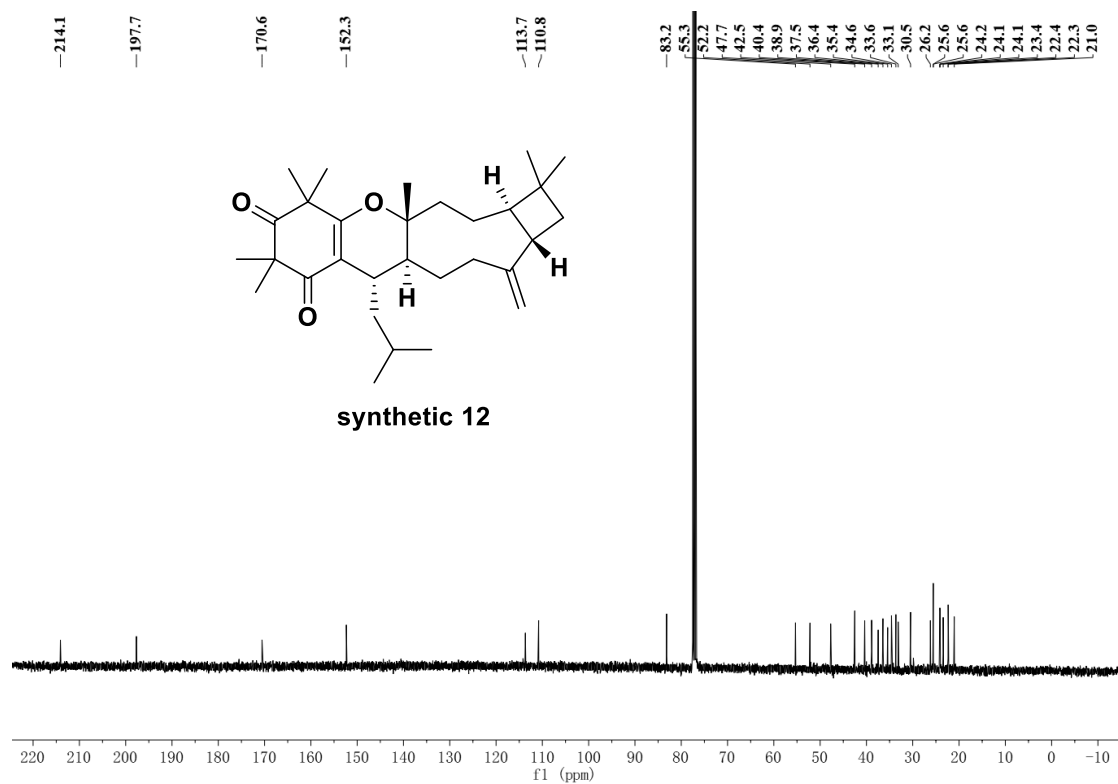

Figure S60.  $^{13}\text{C}$  NMR spectrum (100 MHz) of synthetic **12** in  $\text{CDCl}_3$ .

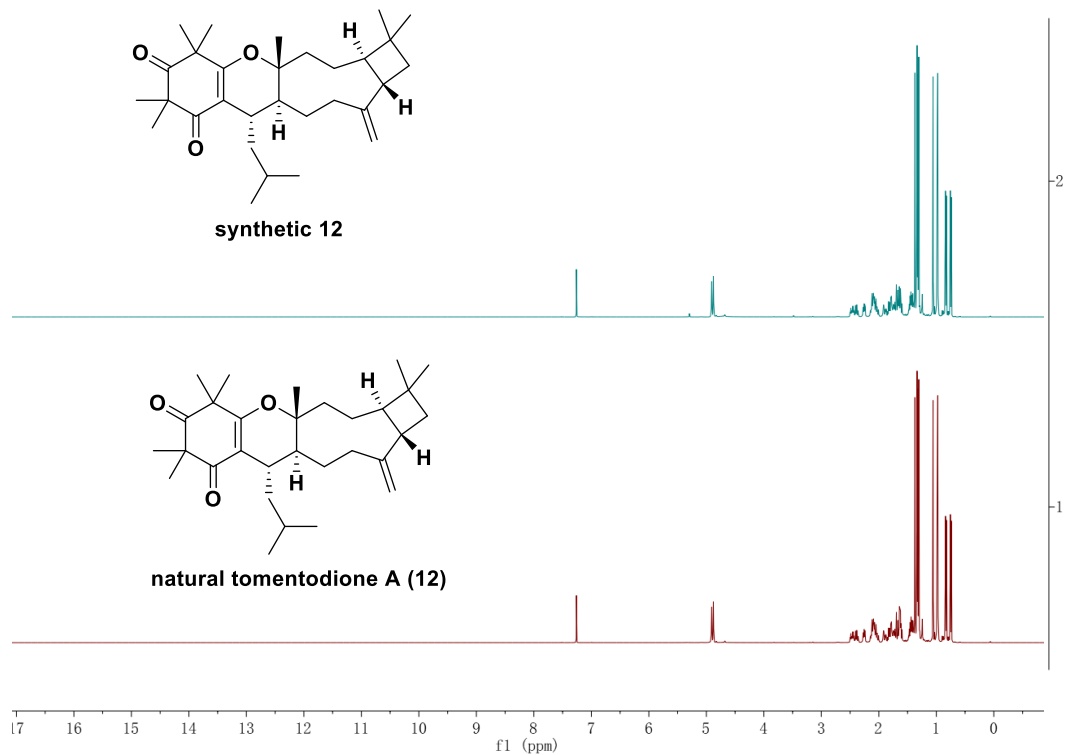

**Figure S61.** Comparison of  $^1\text{H}$  NMR spectra between synthetic and natural **12**.

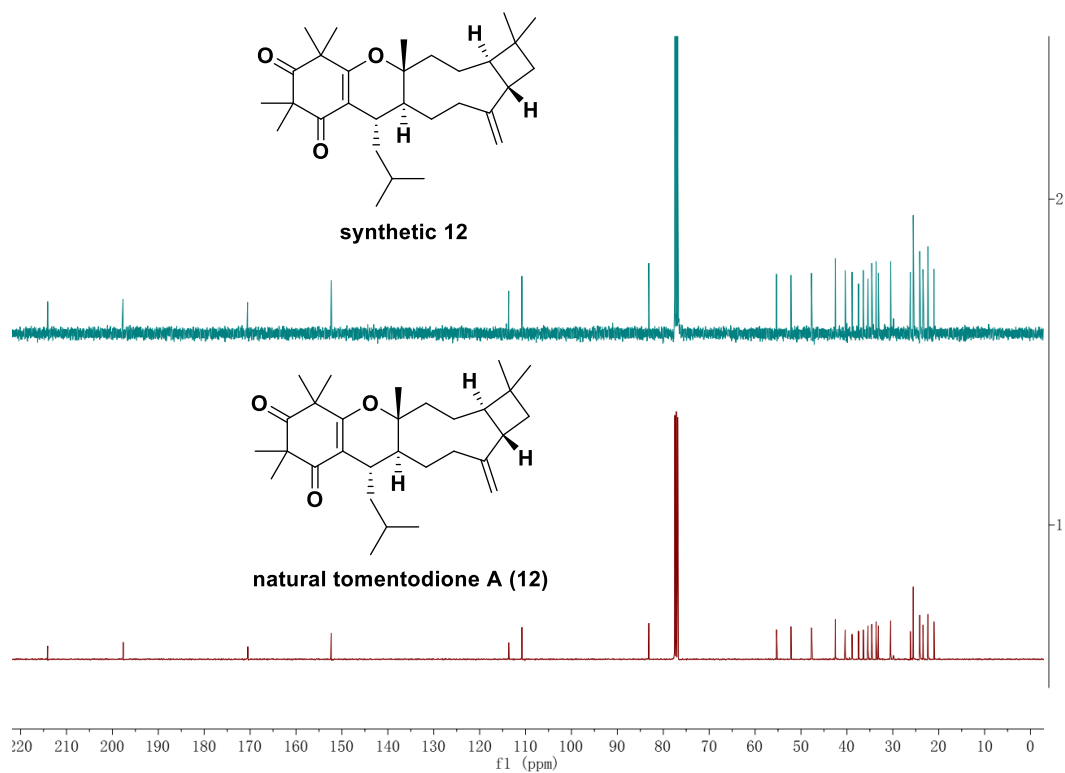

**Figure S62.** Comparison of  $^{13}\text{C}$  NMR spectra between synthetic and natural **12**.

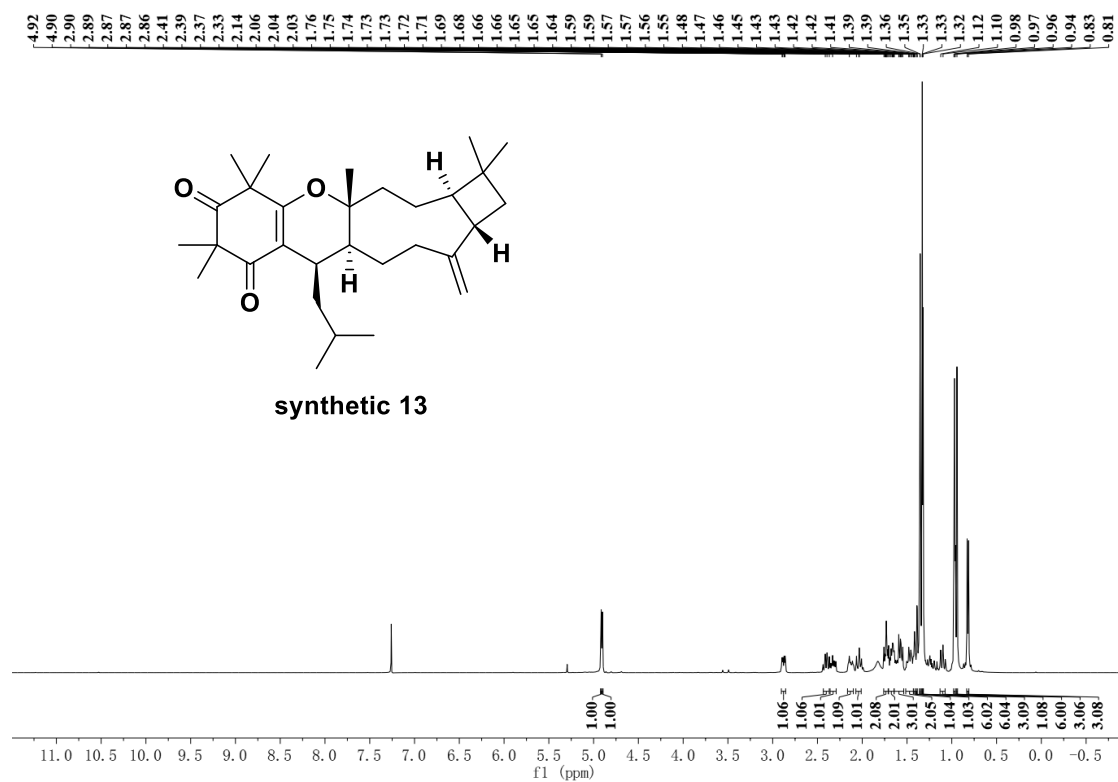

Figure S63.  $^1\text{H}$  NMR spectrum (400 MHz) of synthetic **13** in  $\text{CDCl}_3$ .

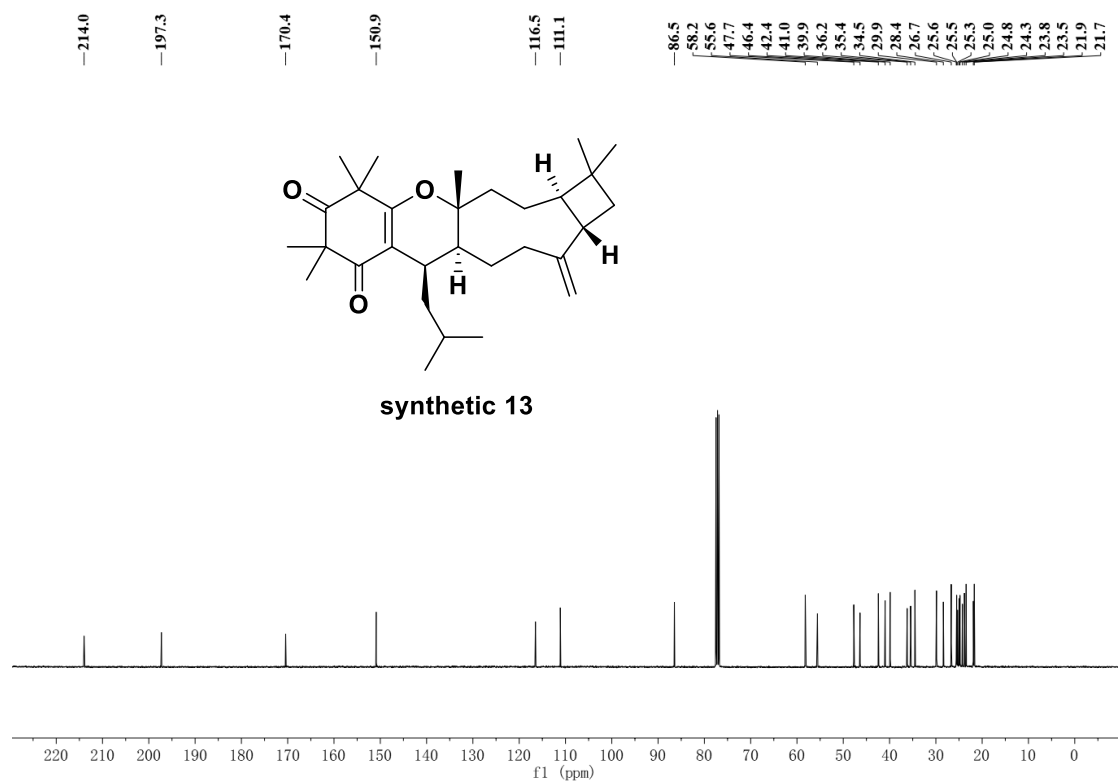

Figure S64.  $^{13}\text{C}$  NMR spectrum (100 MHz) of synthetic **13** in  $\text{CDCl}_3$ .

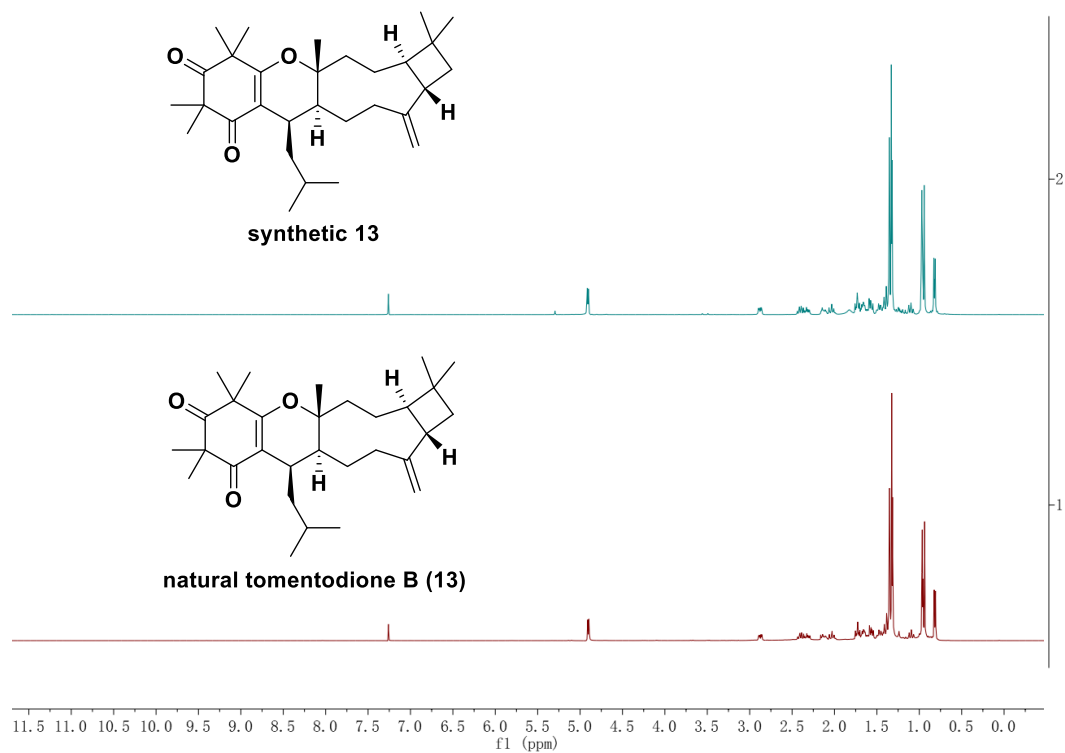

**Figure S65.** Comparison of  $^1\text{H}$  NMR spectra between synthetic and natural **13**.

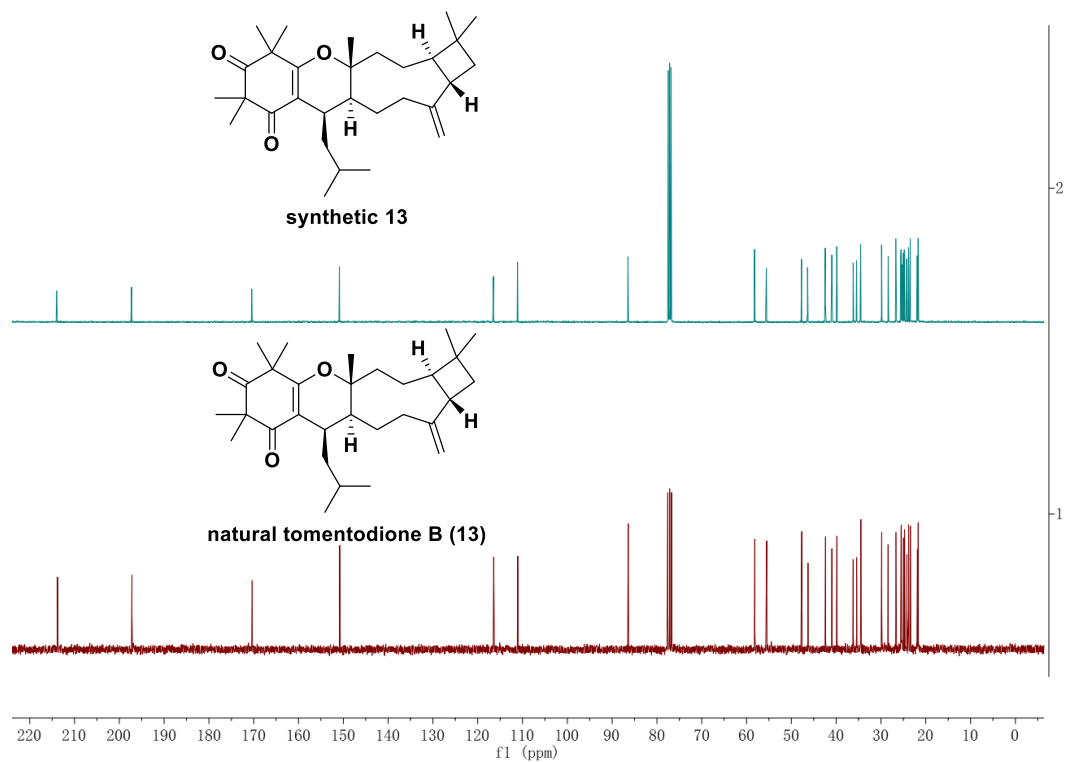

**Figure S66.** Comparison of  $^{13}\text{C}$  NMR spectra between synthetic and natural **13**.

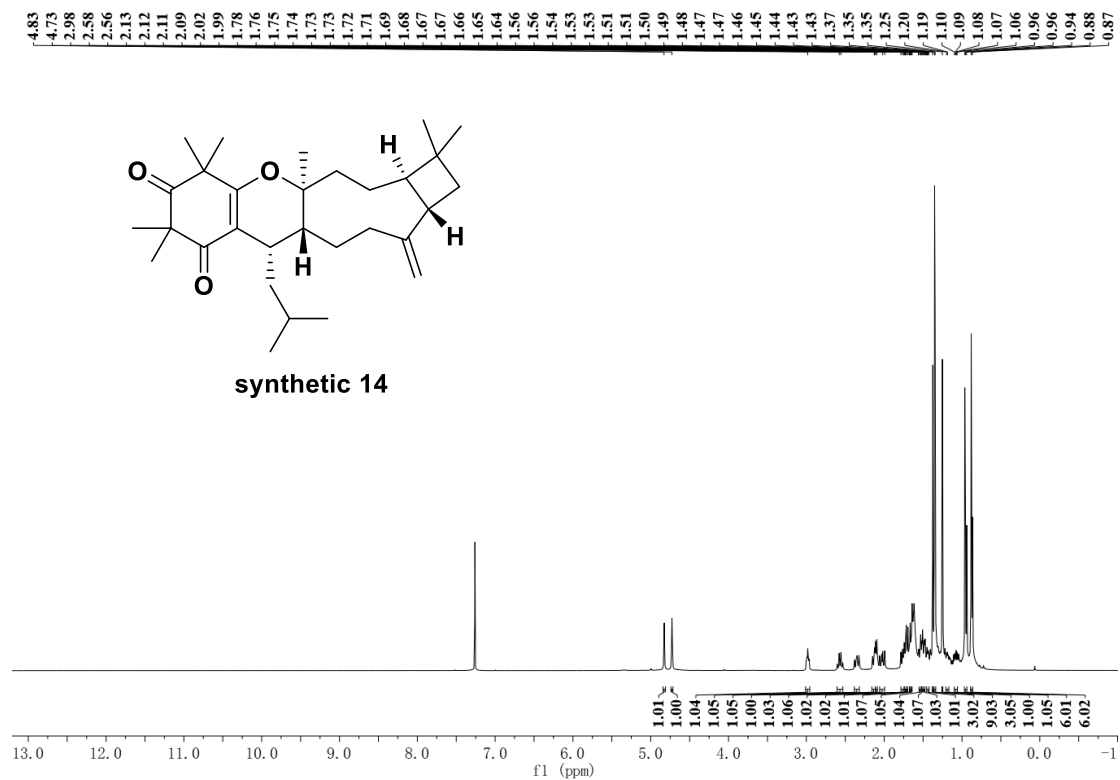

Figure S67.  $^1\text{H}$  NMR spectrum (400 MHz) of synthetic **14** in  $\text{CDCl}_3$ .

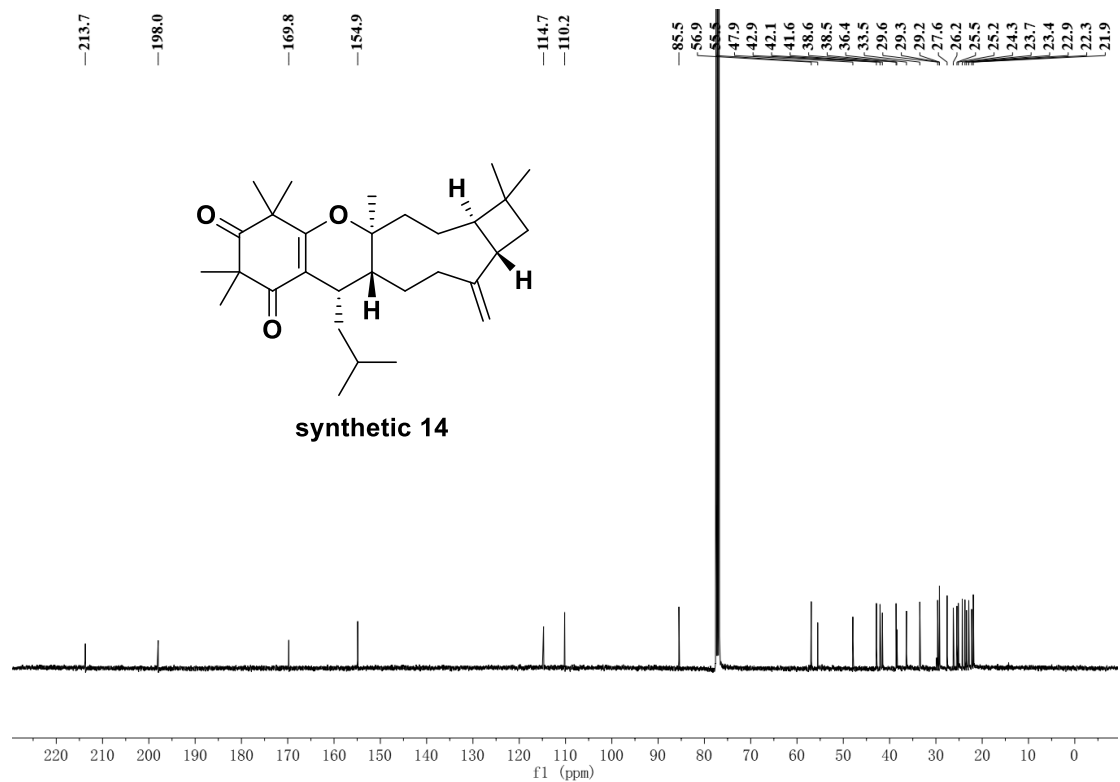

Figure S68.  $^{13}\text{C}$  NMR spectrum (100 MHz) of synthetic **14** in  $\text{CDCl}_3$ .



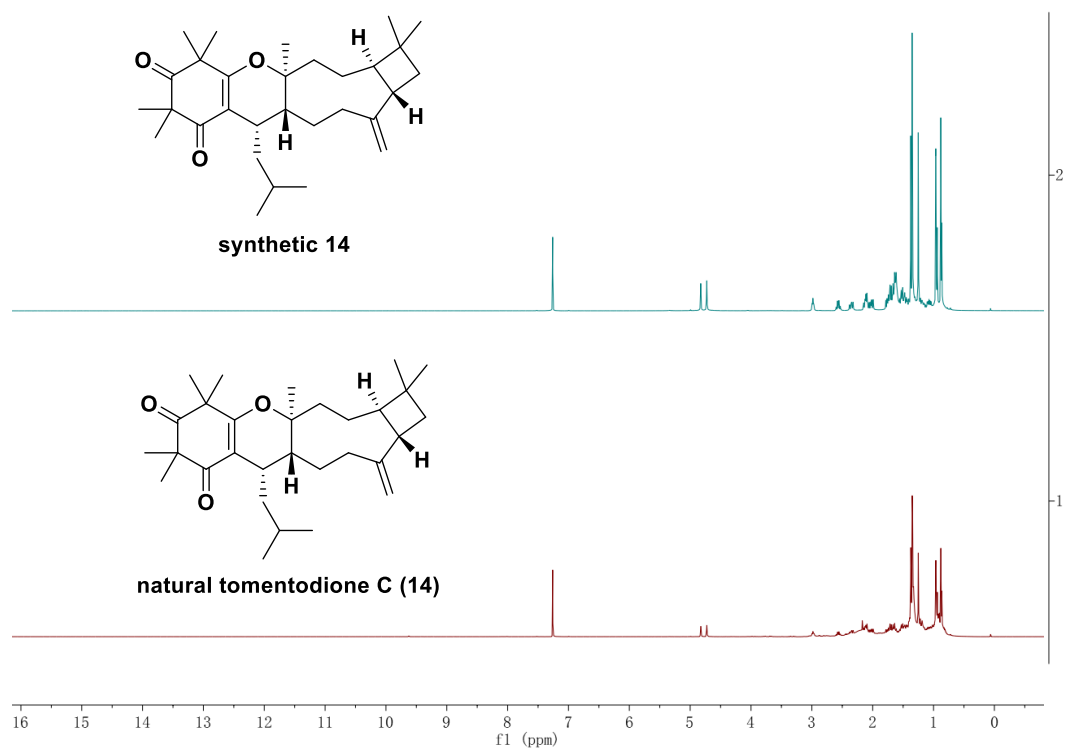

**Figure S69.** Comparison of  $^1\text{H}$  NMR spectra between synthetic and natural **14**.

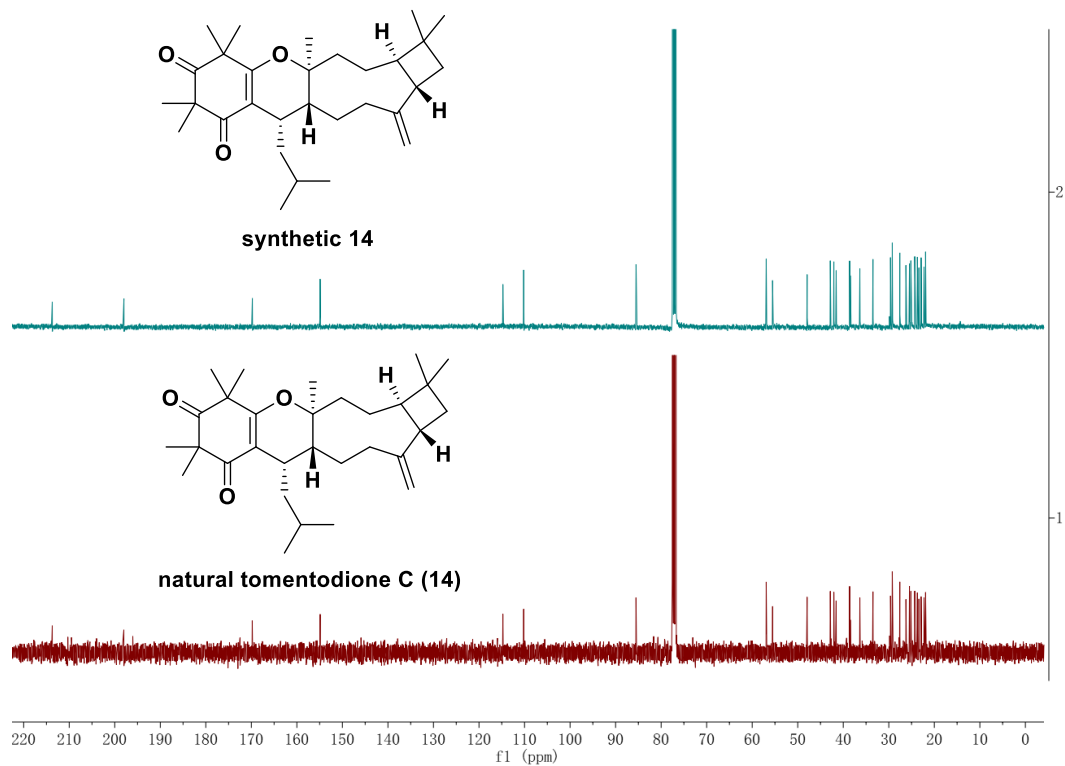

**Figure S70.** Comparison of  $^{13}\text{C}$  NMR spectra between synthetic and natural **14**.

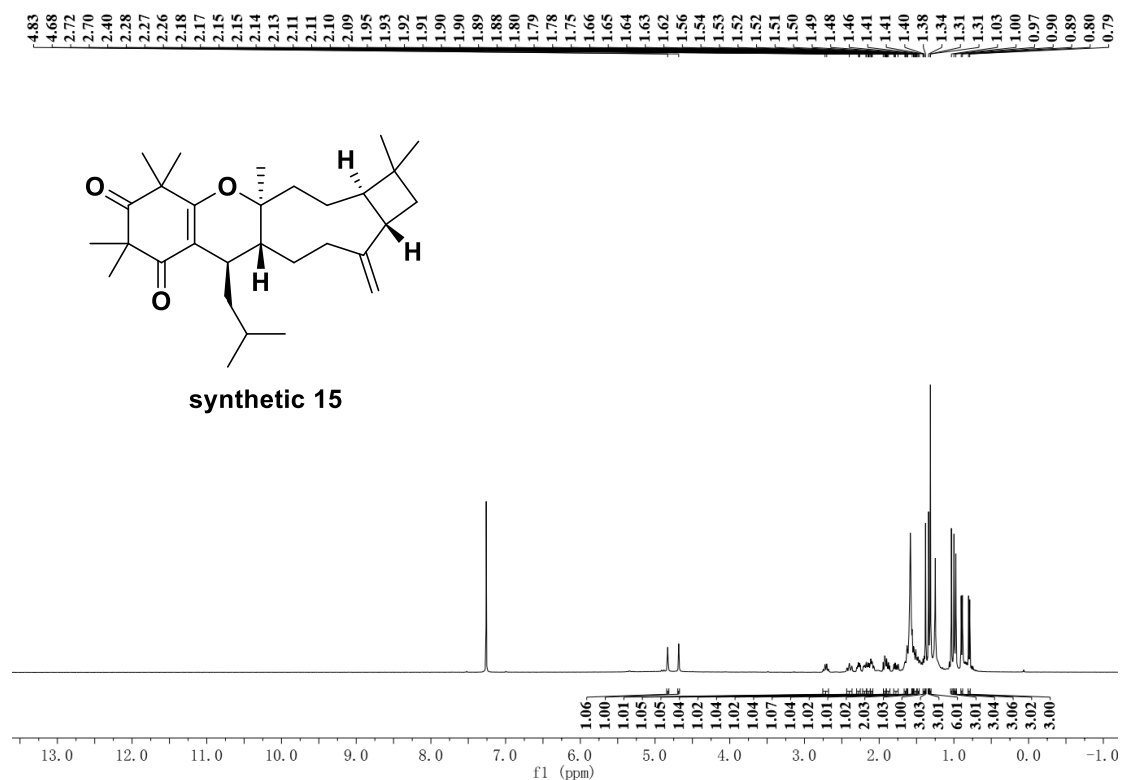

Figure S71.  $^1\text{H}$  NMR spectrum (400 MHz) of synthetic **15** in  $\text{CDCl}_3$ .

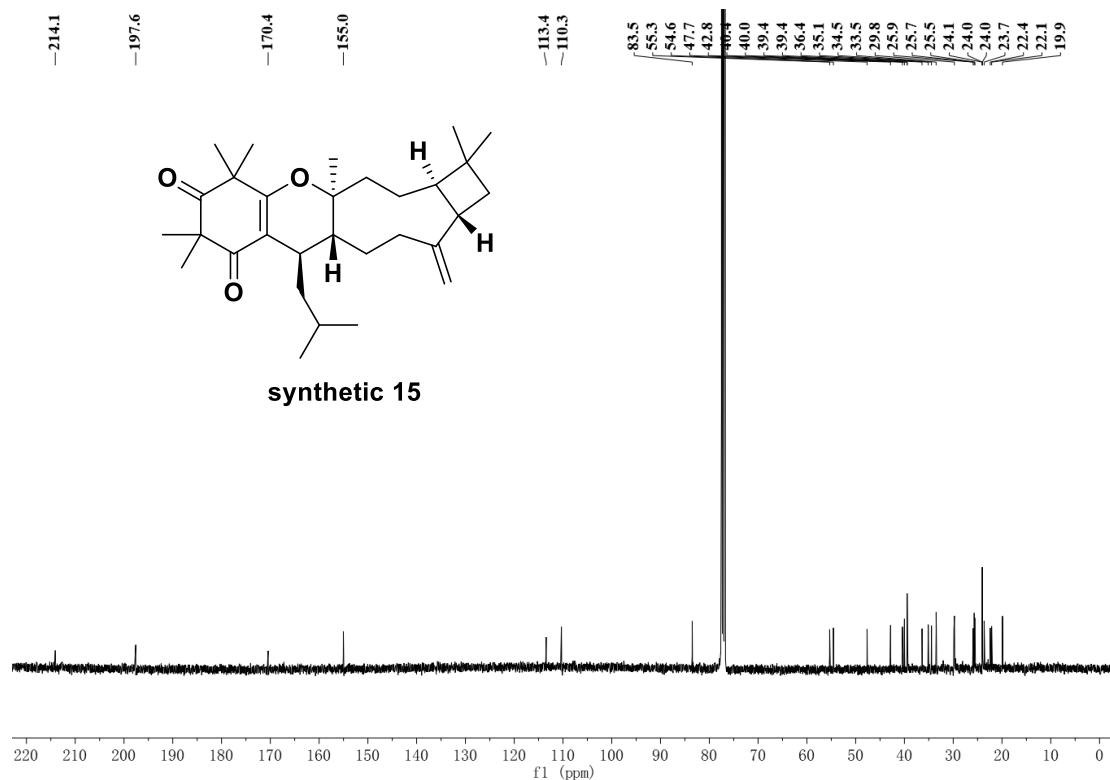

Figure S72.  $^{13}\text{C}$  NMR spectrum (100 MHz) of synthetic **15** in  $\text{CDCl}_3$ .

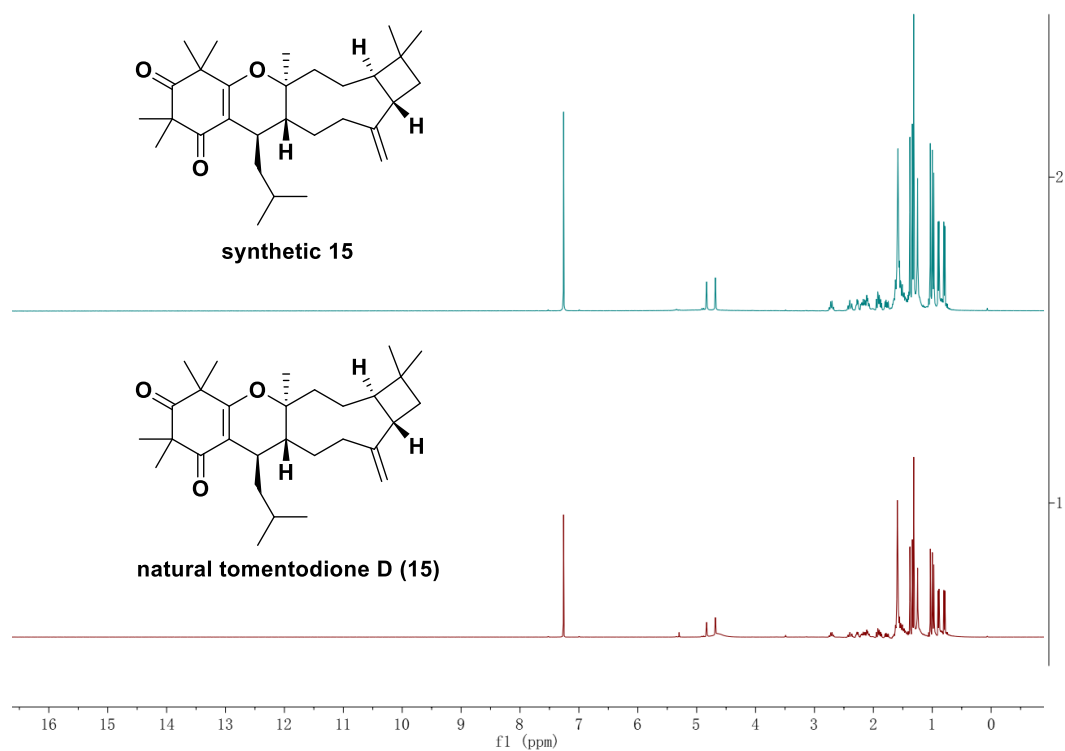

**Figure S73.** Comparison of  $^1\text{H}$  NMR spectra between synthetic and natural **15**.

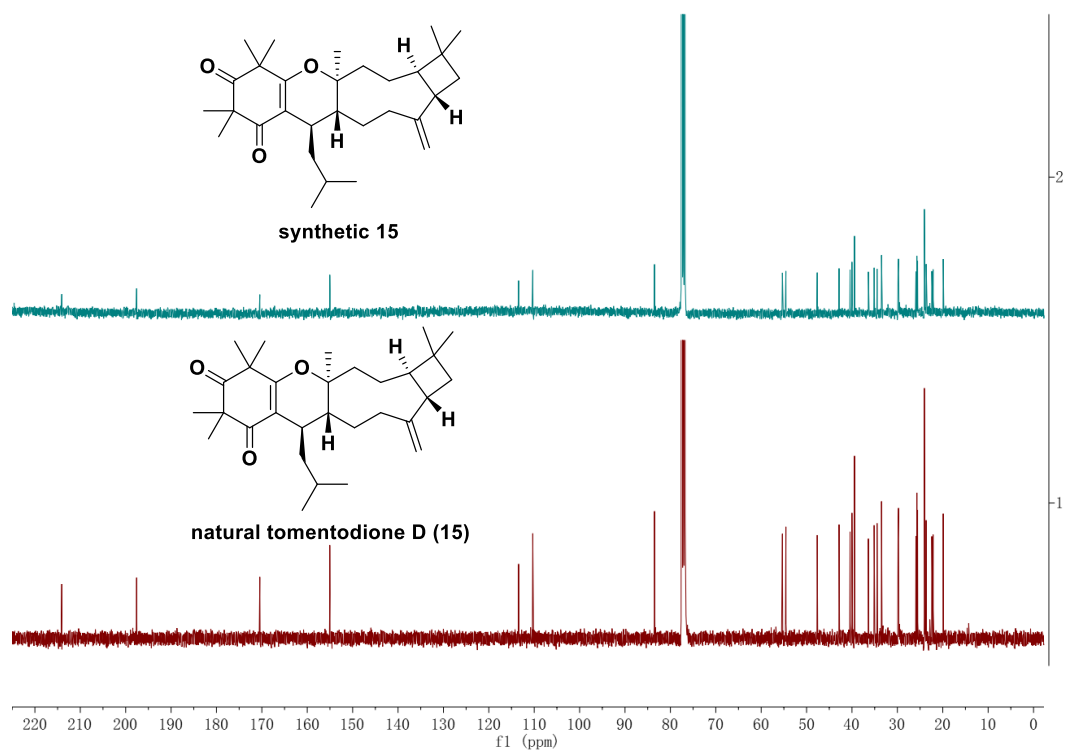

**Figure S74.** Comparison of  $^{13}\text{C}$  NMR spectra between synthetic and natural **15**.

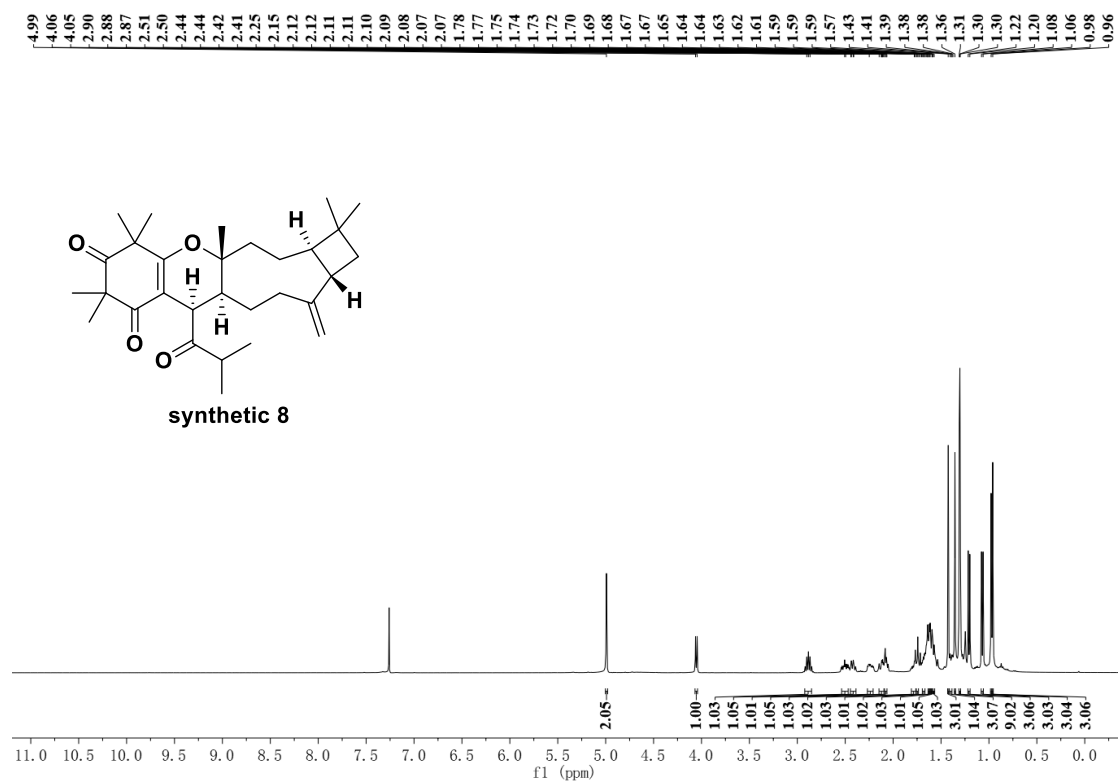

Figure S75.  $^1\text{H}$  NMR spectrum (400 MHz) of synthetic **8** in  $\text{CDCl}_3$ .

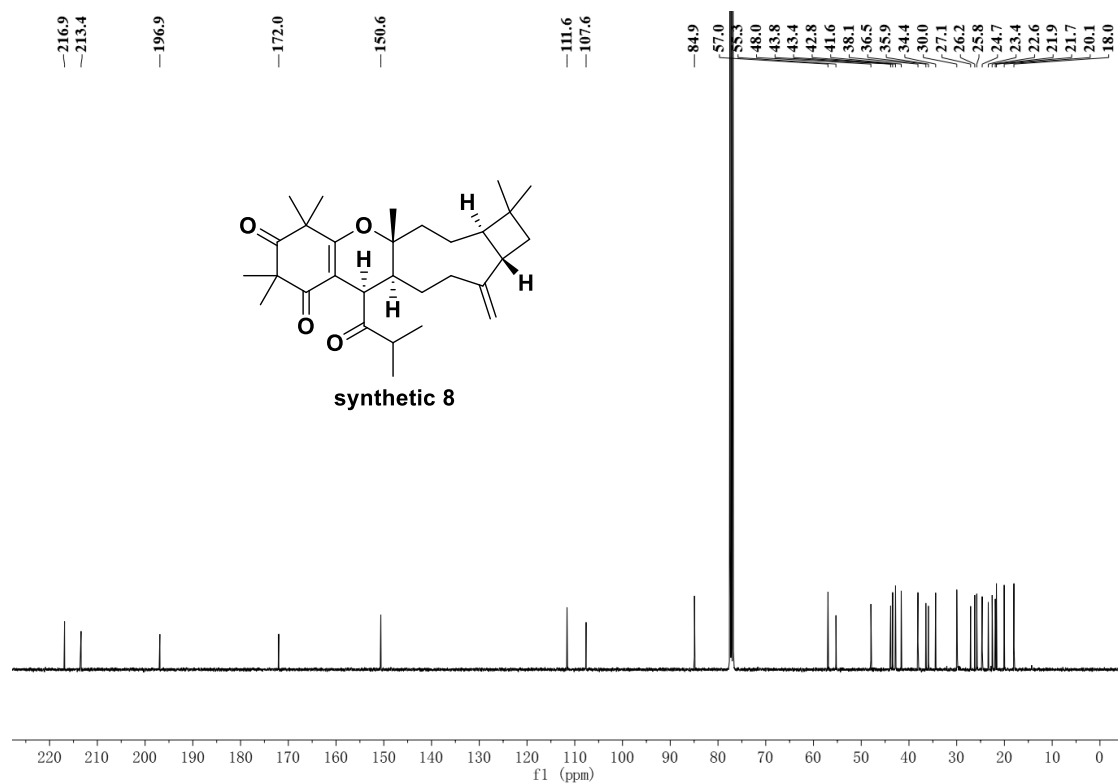

Figure S76.  $^{13}\text{C}$  NMR spectrum (100 MHz) of synthetic **8** in  $\text{CDCl}_3$ .

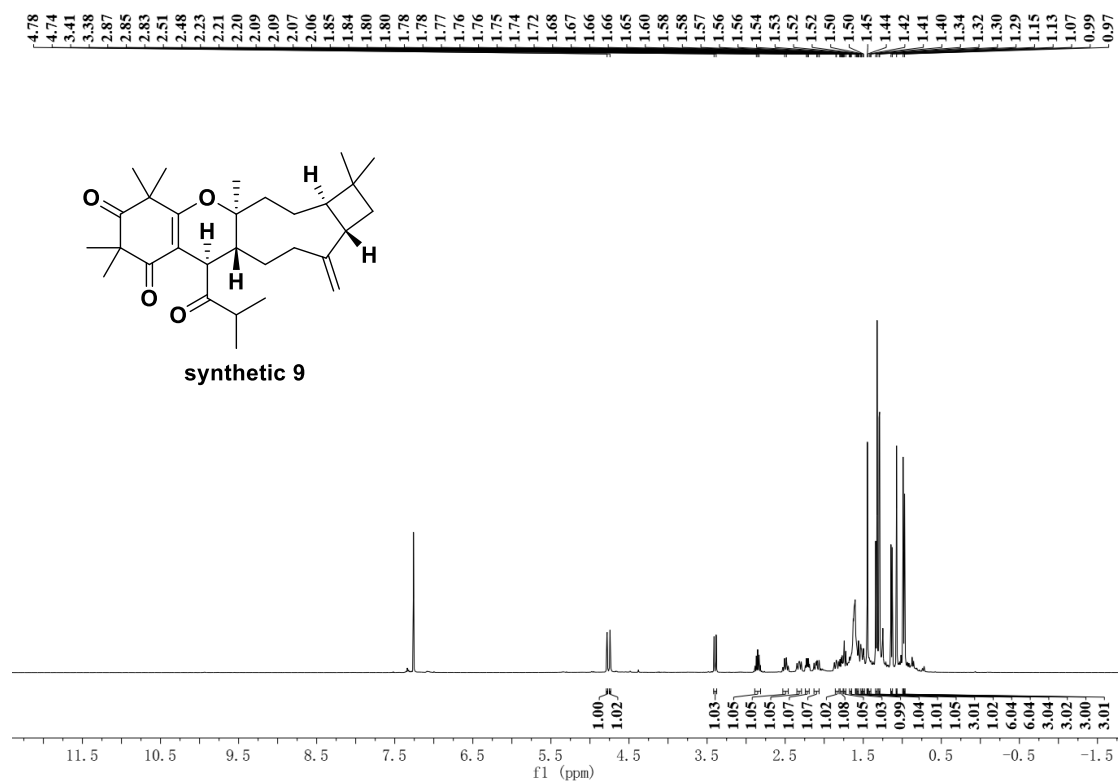

Figure S77.  $^1\text{H}$  NMR spectrum (400 MHz) of synthetic **9** in  $\text{CDCl}_3$ .

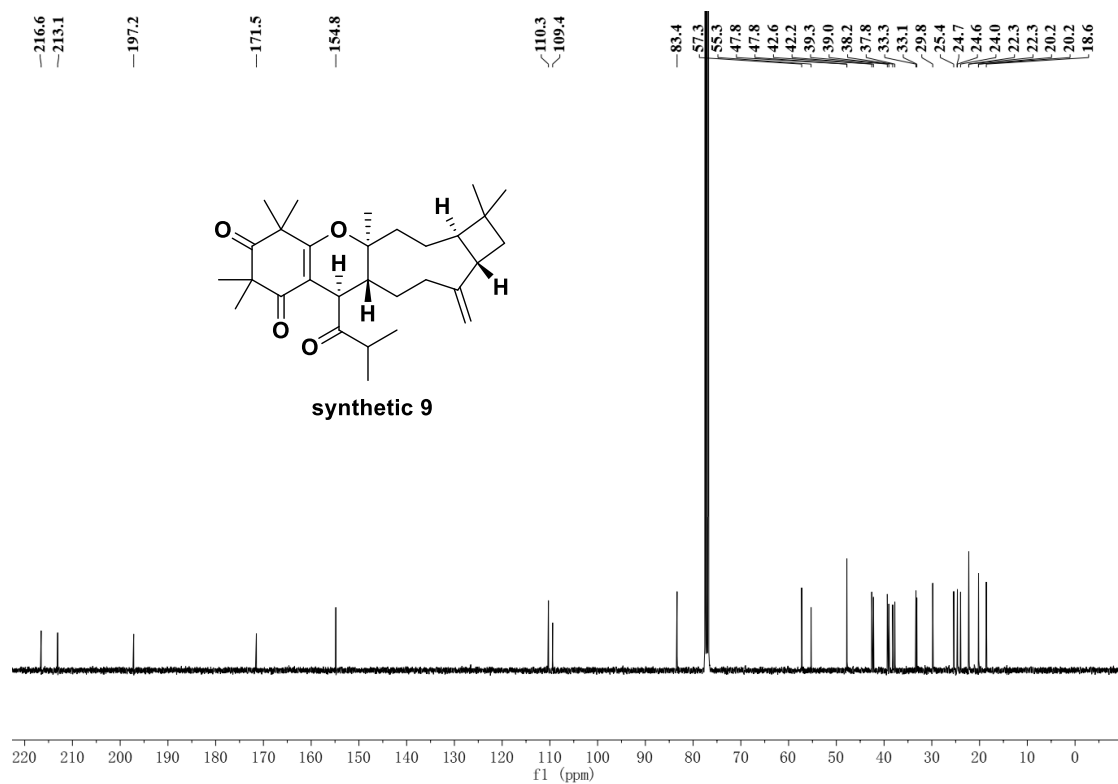

Figure S78.  $^{13}\text{C}$  NMR spectrum (100 MHz) of synthetic **9** in  $\text{CDCl}_3$ .

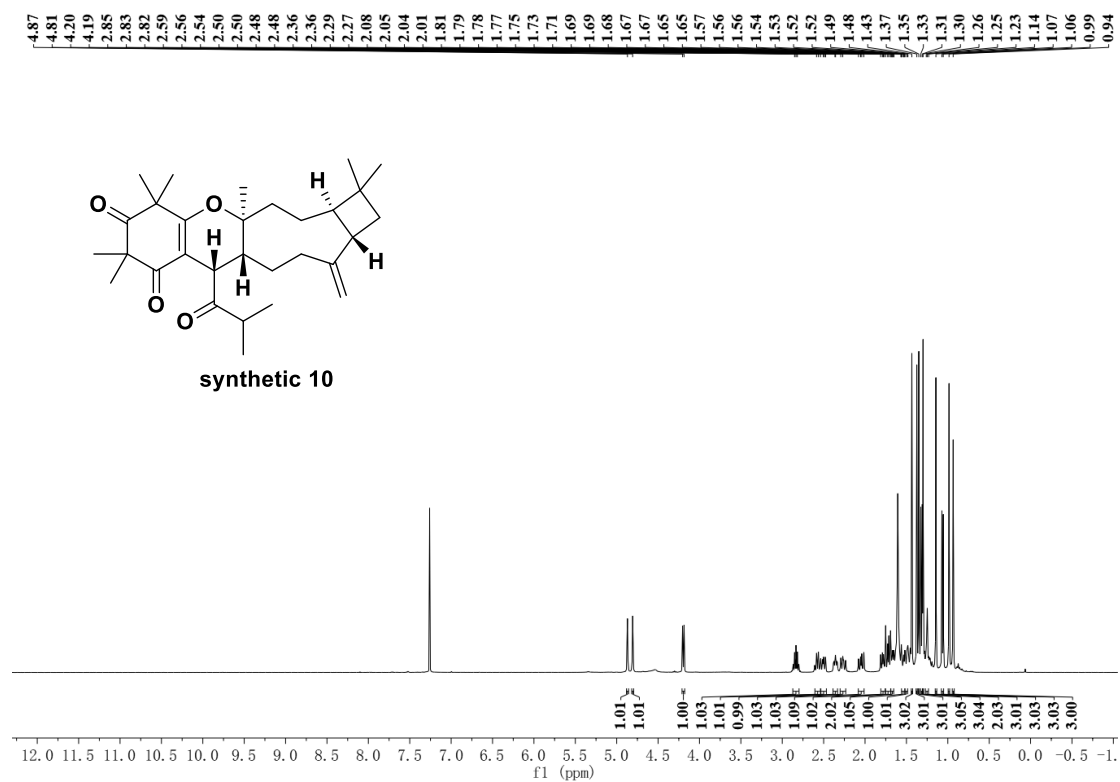

Figure S79.  $^1\text{H}$  NMR spectrum (400 MHz) of synthetic **10** in  $\text{CDCl}_3$ .

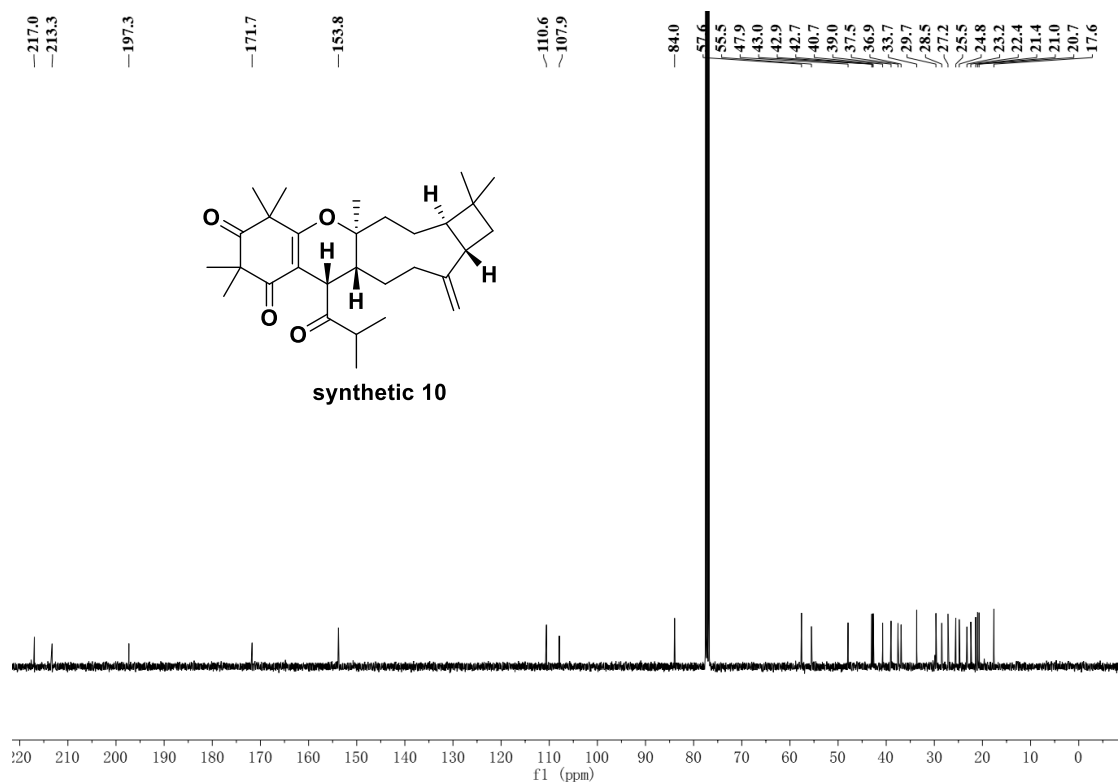

Figure S80.  $^{13}\text{C}$  NMR spectrum (100 MHz) of synthetic **10** in  $\text{CDCl}_3$ .

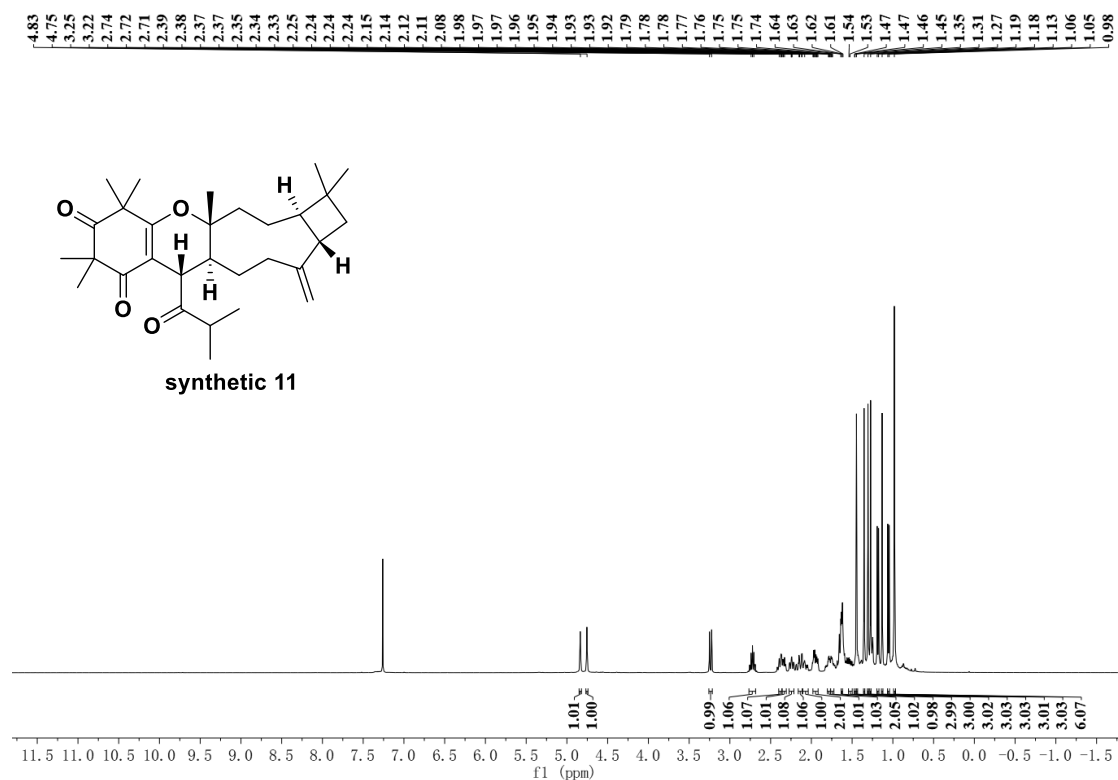

Figure S81.  $^1\text{H}$  NMR spectrum (400 MHz) of synthetic **11** in  $\text{CDCl}_3$ .

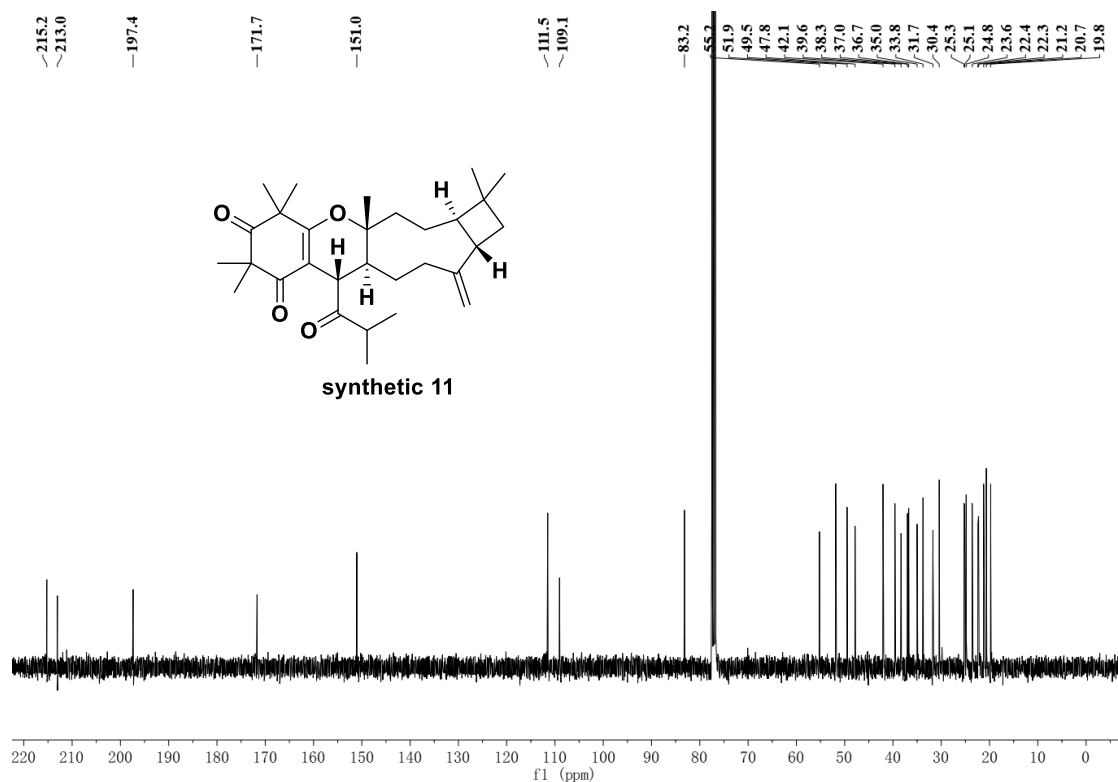

Figure S82.  $^{13}\text{C}$  NMR spectrum (100 MHz) of synthetic **11** in  $\text{CDCl}_3$ .

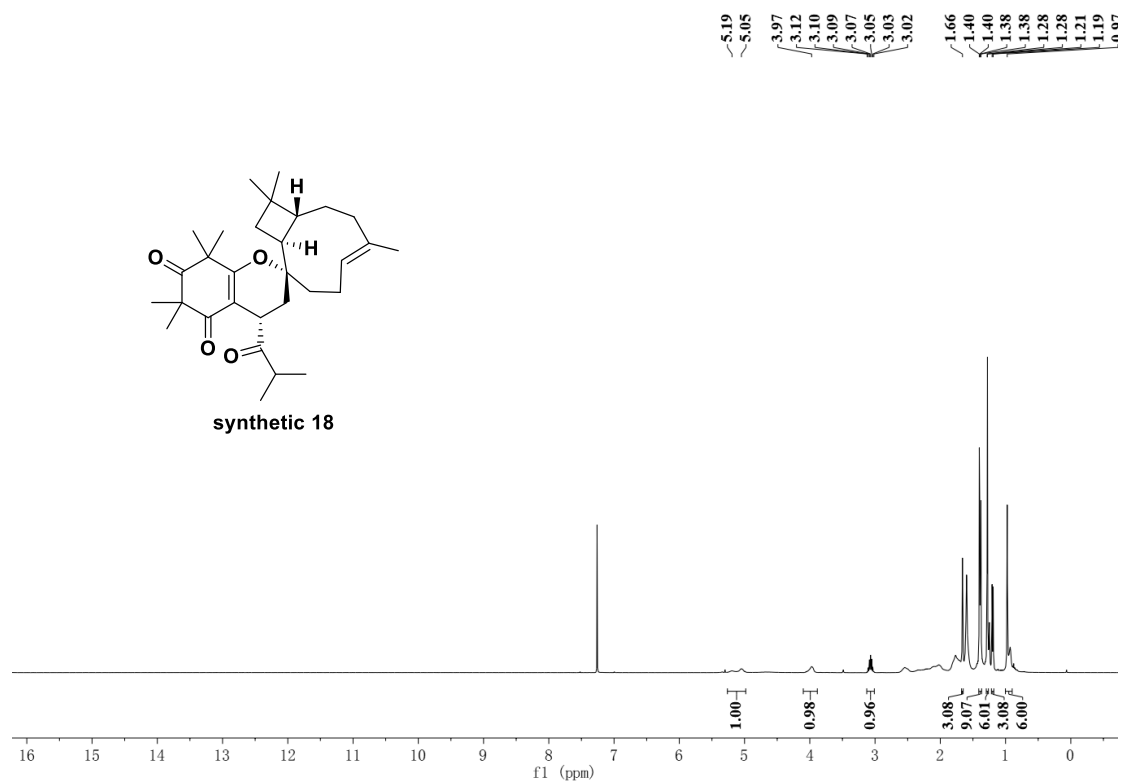

**Figure S83.**  $^1\text{H}$  NMR spectrum (400 MHz) of synthetic **18** in  $\text{CDCl}_3$ .

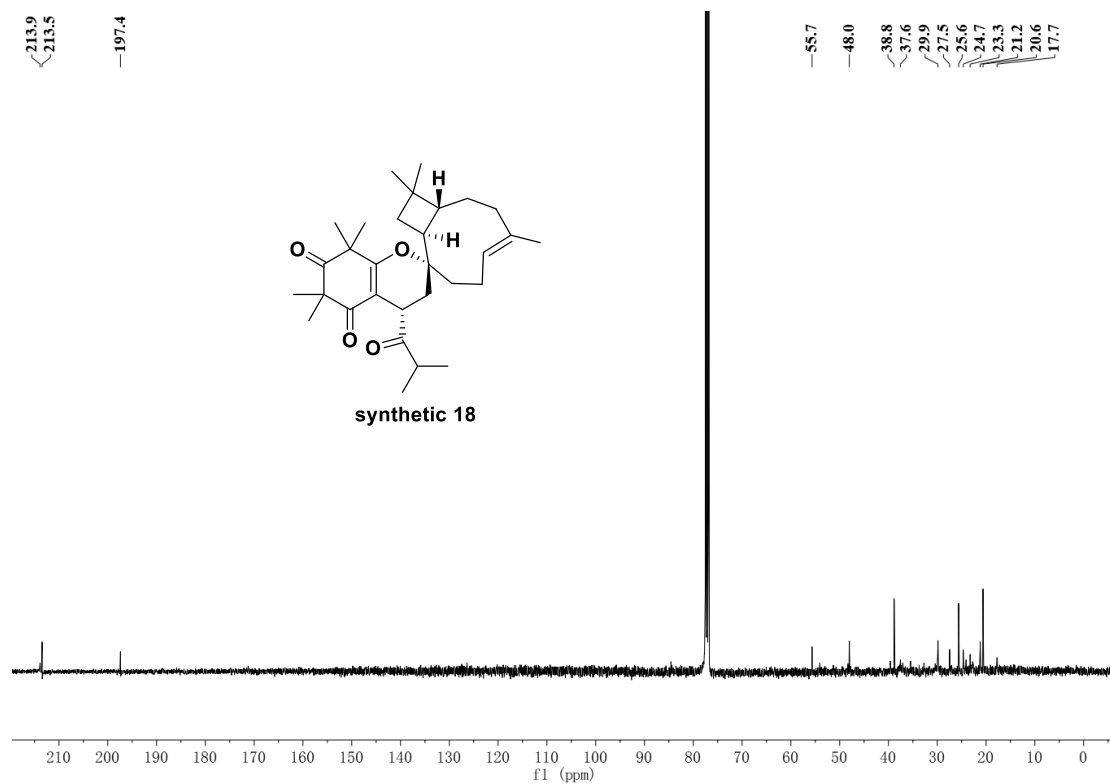

**Figure S84.**  $^{13}\text{C}$  NMR spectrum (100 MHz) of synthetic **18** in  $\text{CDCl}_3$ .



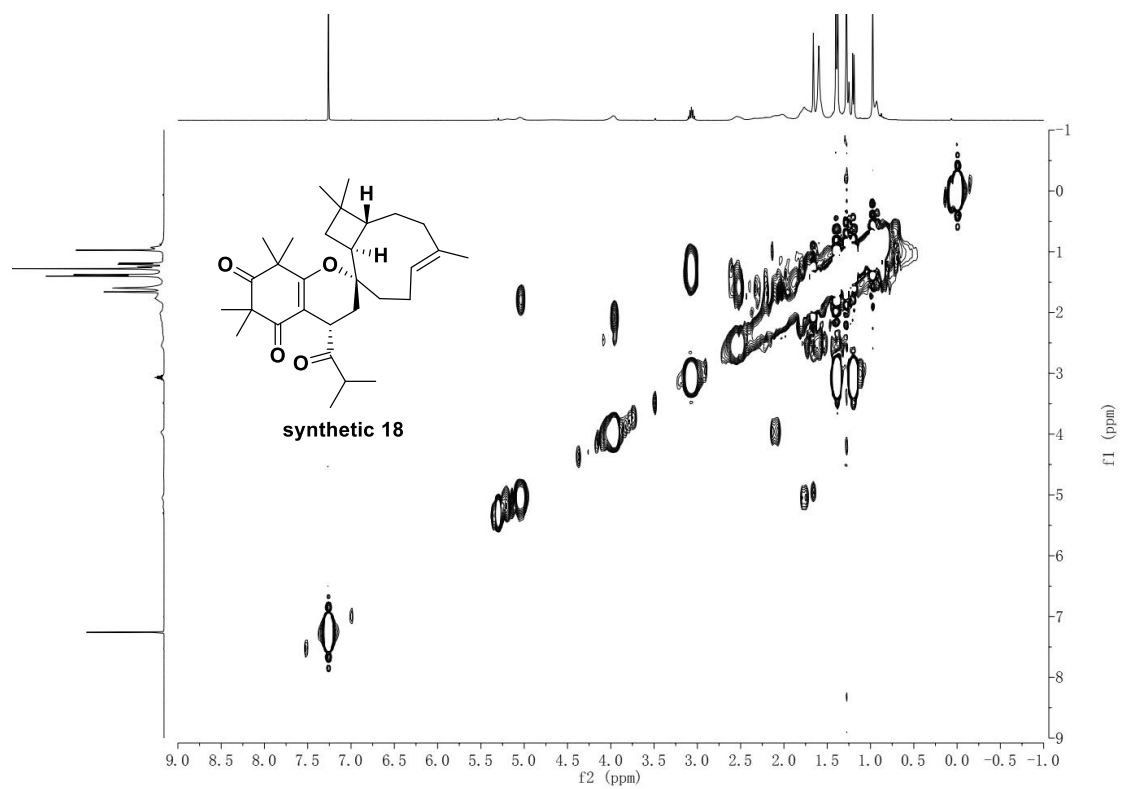

**Figure S85.**  $^1\text{H}$ - $^1\text{H}$  COSY spectrum of synthetic **18** in  $\text{CDCl}_3$ .

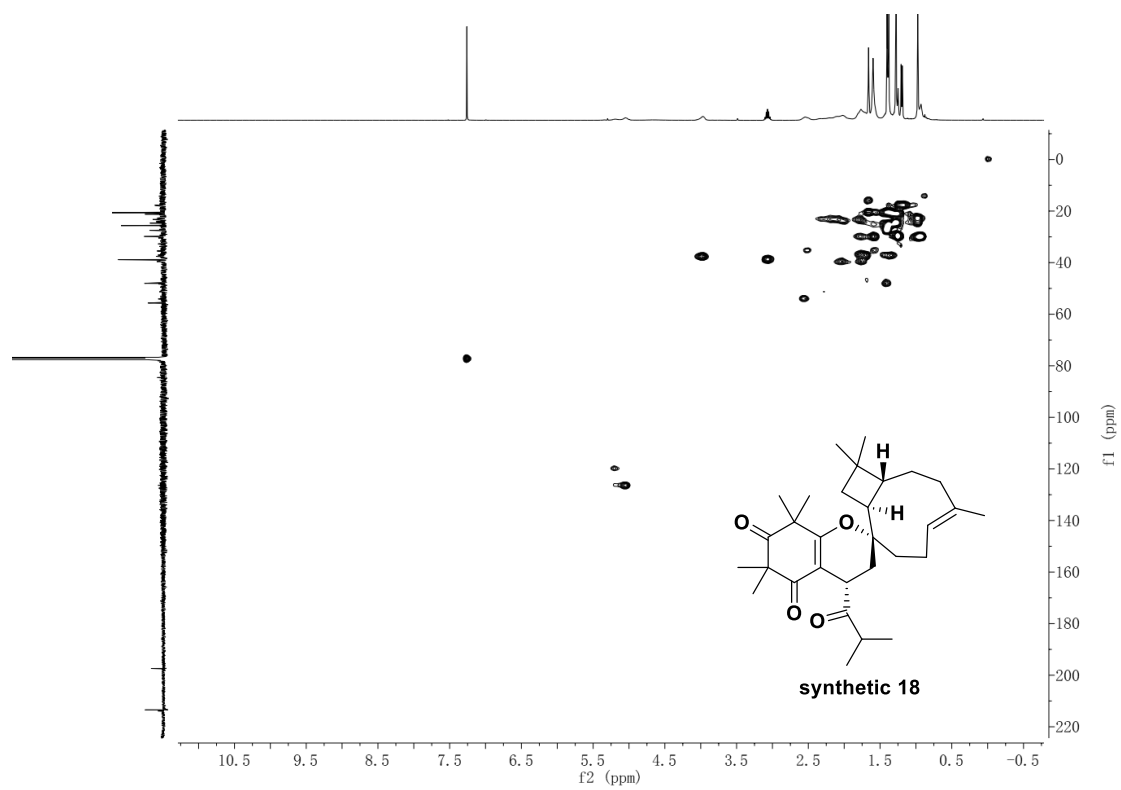

**Figure S86.** HSQC spectrum of synthetic **18** in  $\text{CDCl}_3$ .

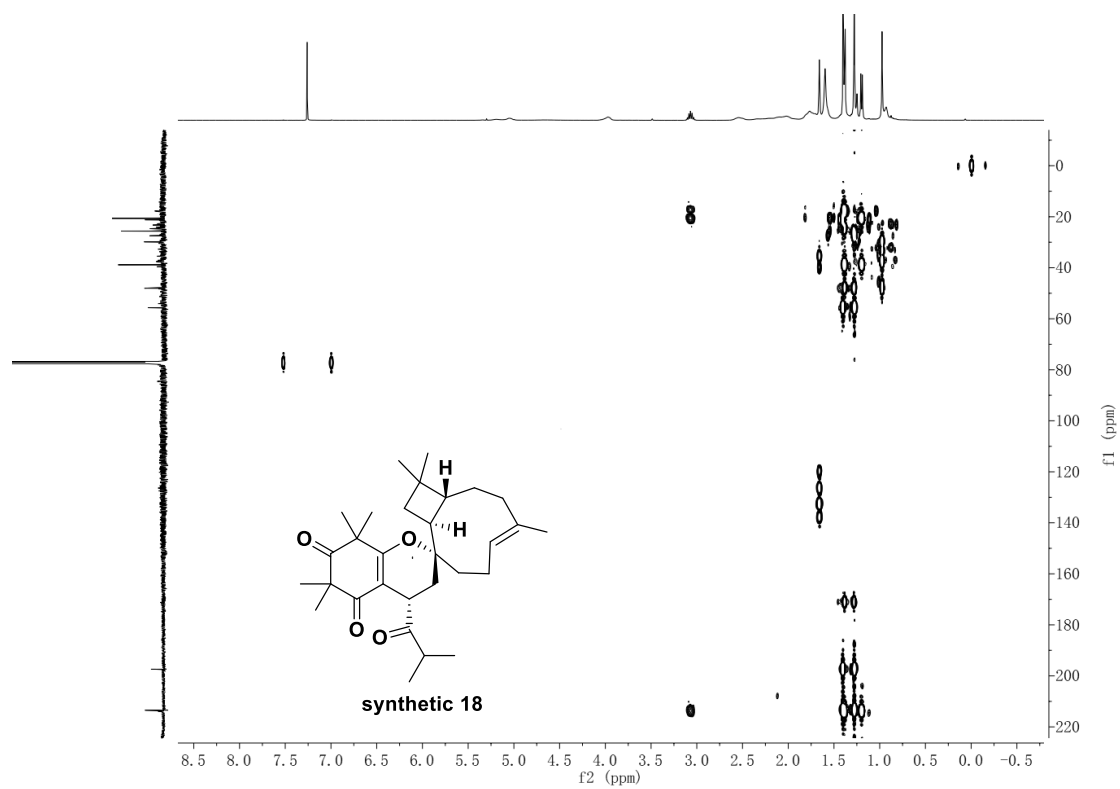

Figure S87. HMBC spectrum of synthetic **18** in  $\text{CDCl}_3$ .

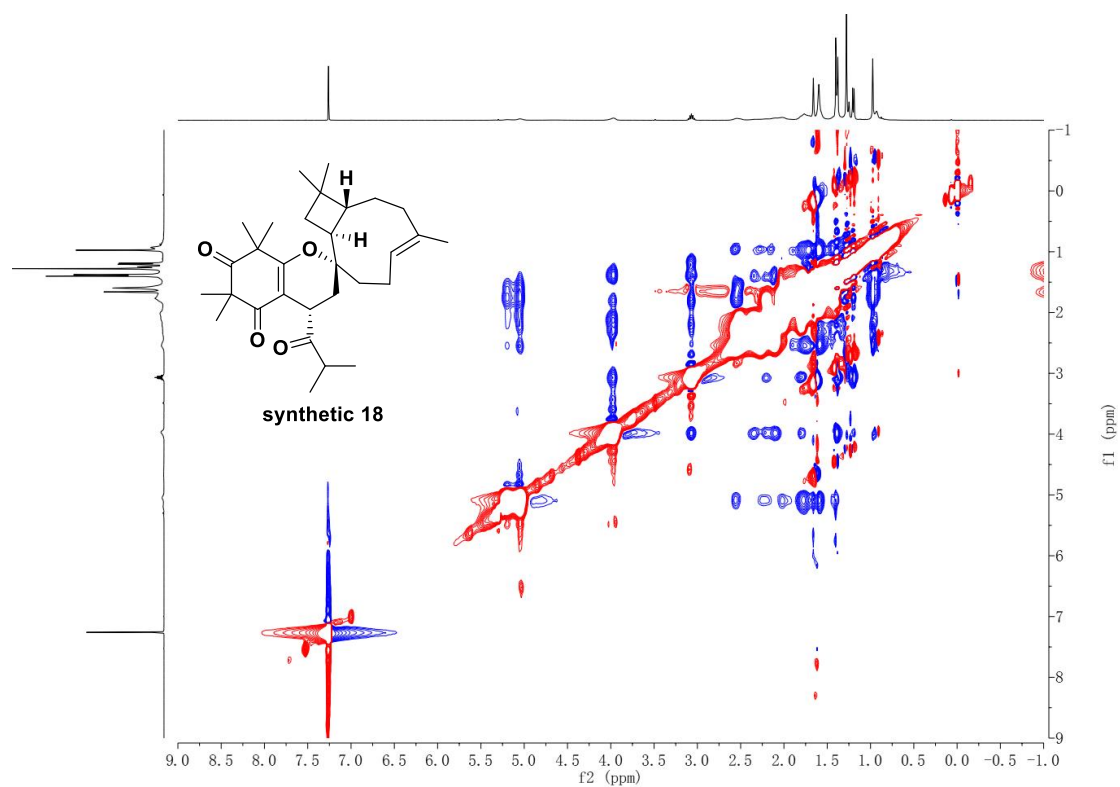

Figure S88. NOESY spectrum of synthetic **18** in  $\text{CDCl}_3$ .

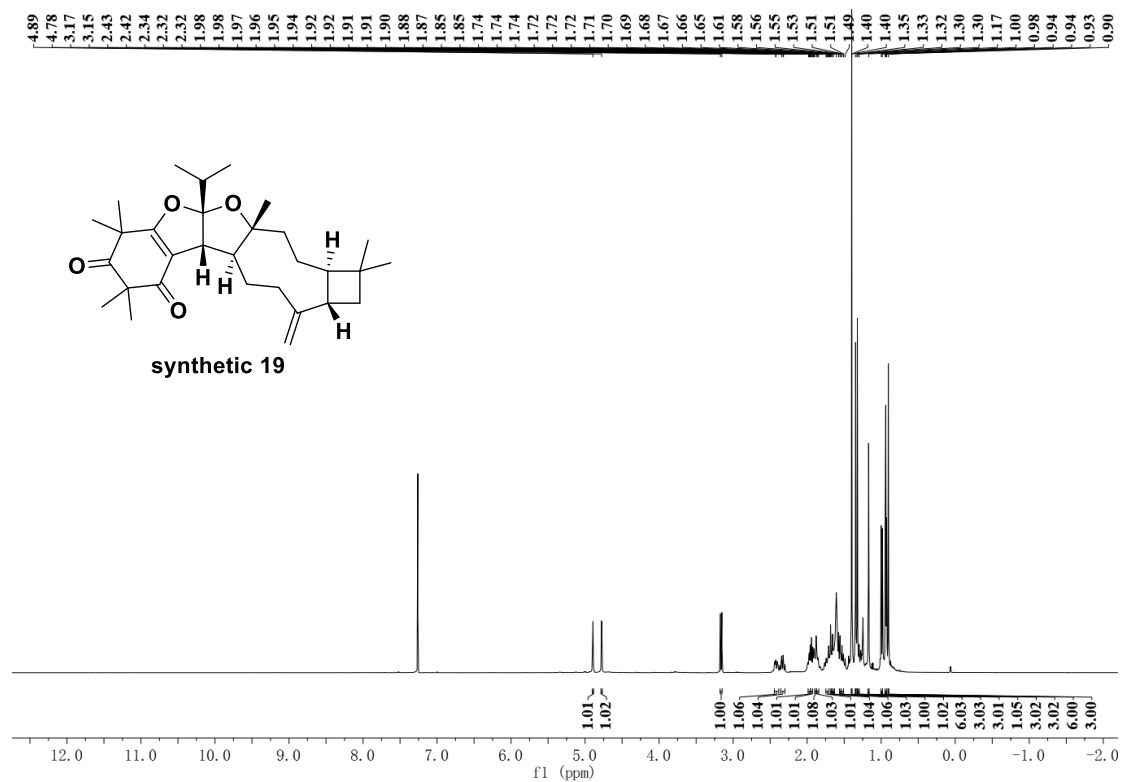

Figure S89. <sup>1</sup>H NMR spectrum (400 MHz) of synthetic **19** in CDCl<sub>3</sub>.

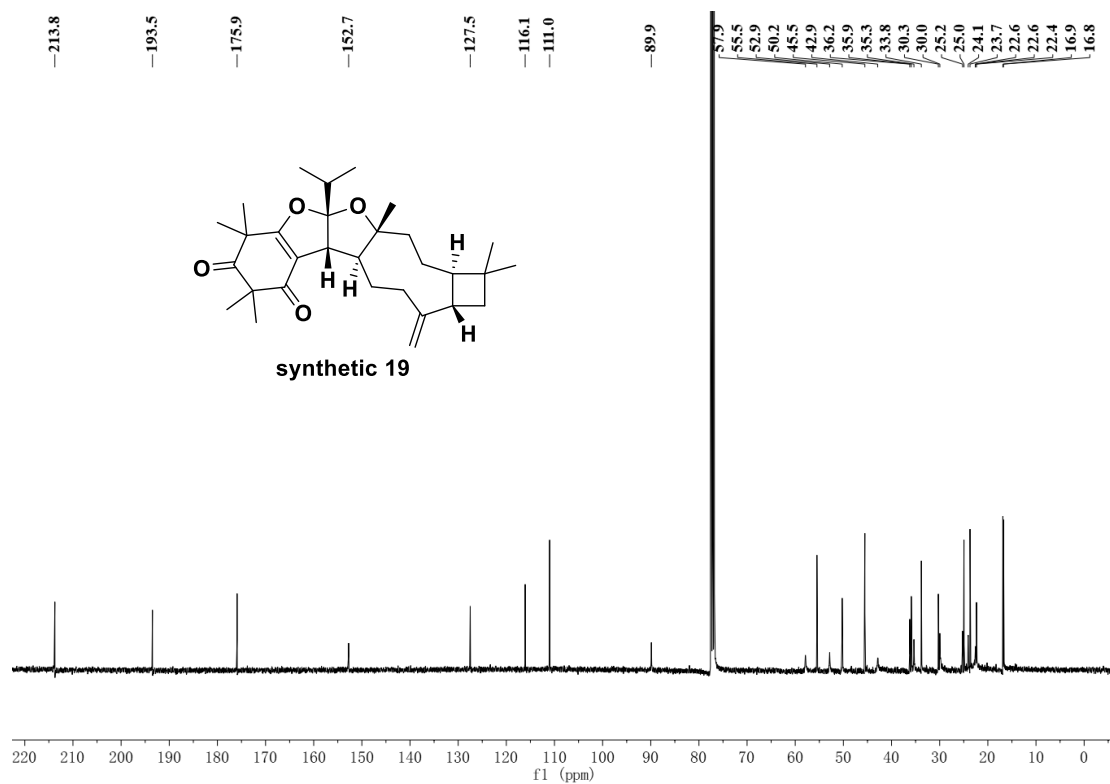

Figure S90. <sup>13</sup>C NMR spectrum (100 MHz) of synthetic **19** in CDCl<sub>3</sub>.

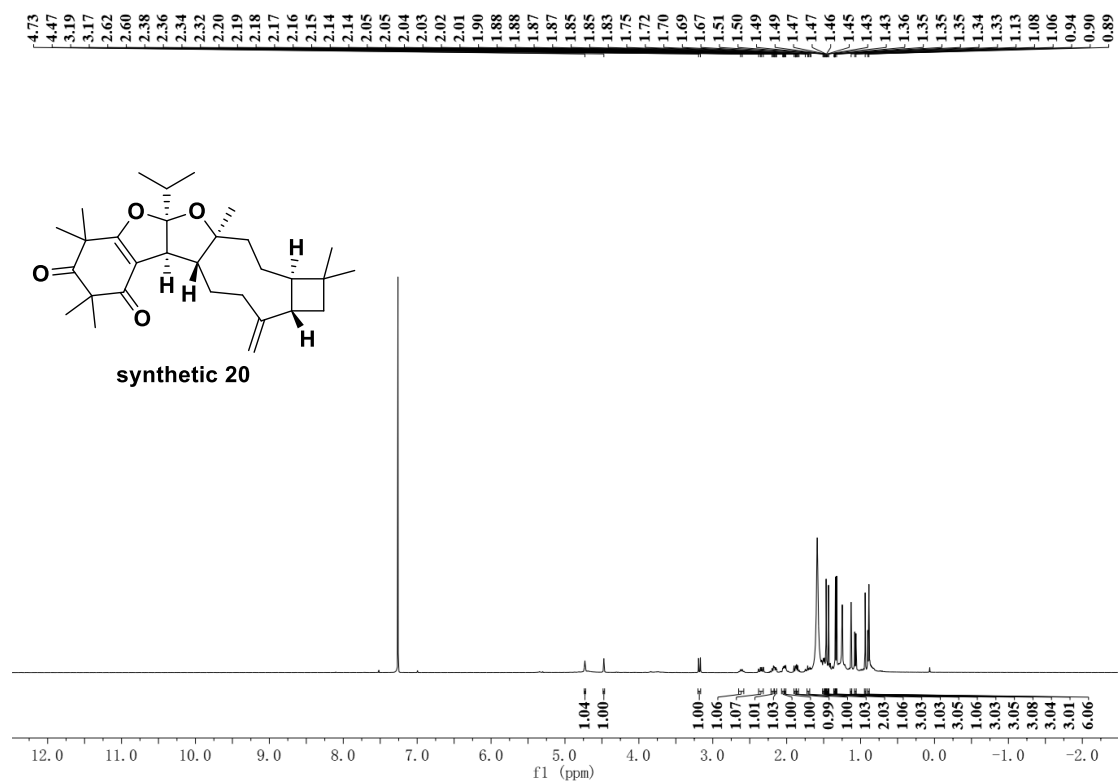

Figure S91.  $^1\text{H}$  NMR spectrum (400 MHz) of synthetic **20** in  $\text{CDCl}_3$ .

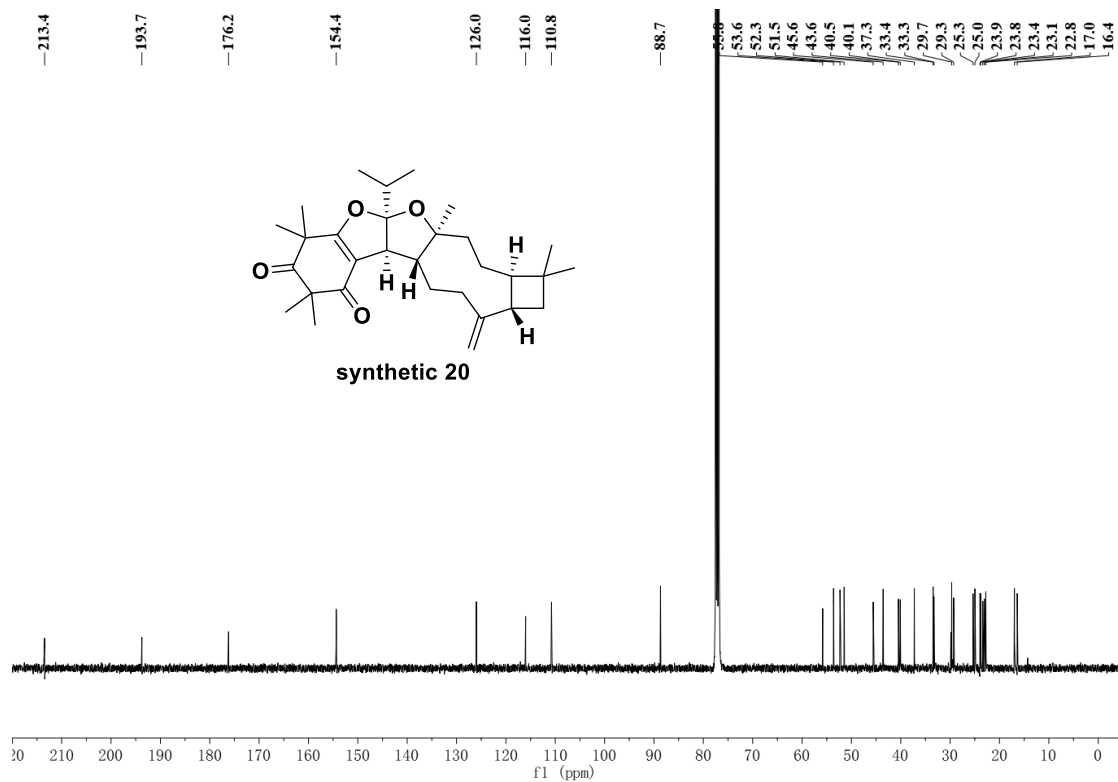

Figure S92.  $^{13}\text{C}$  NMR spectrum (100 MHz) of synthetic **20** in  $\text{CDCl}_3$ .

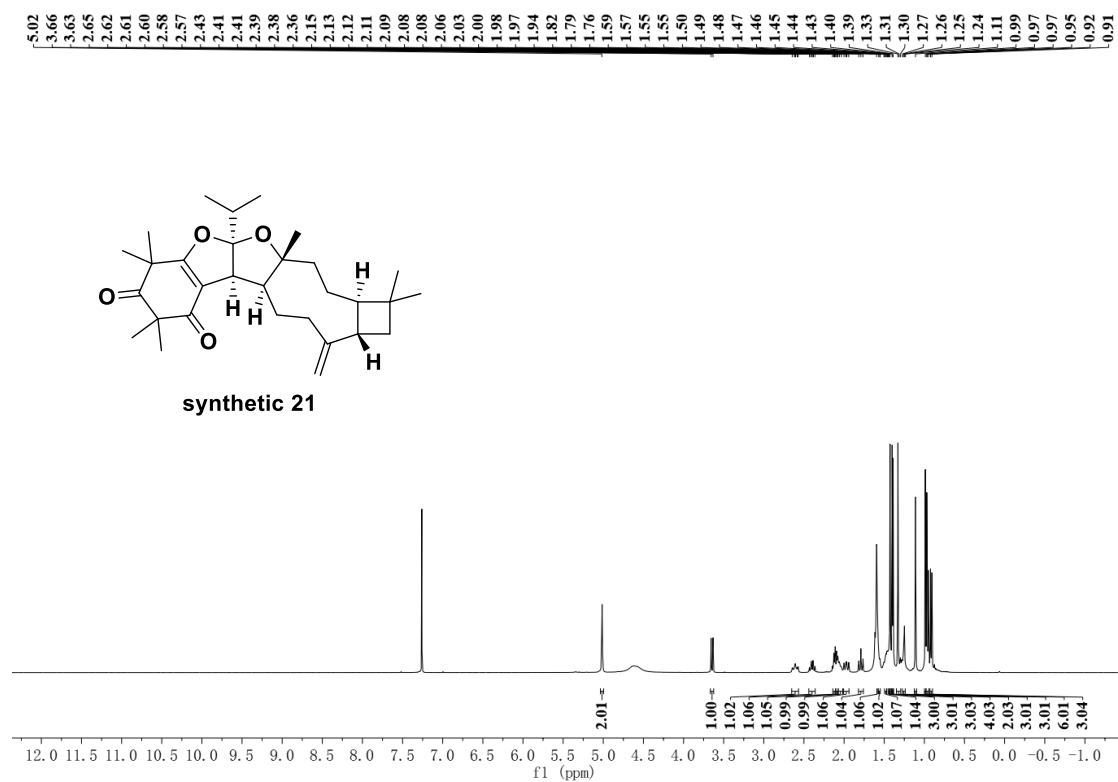

Figure S93.  $^1\text{H}$  NMR spectrum (400 MHz) of synthetic **21** in  $\text{CDCl}_3$ .

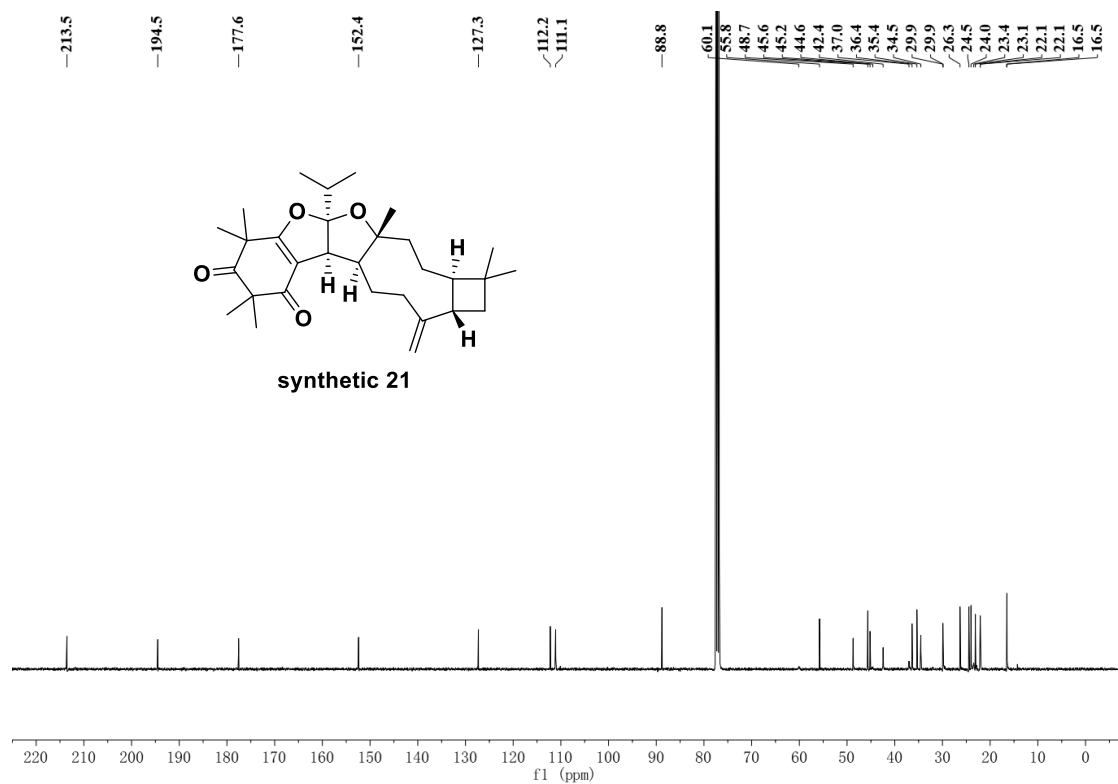

Figure S94.  $^{13}\text{C}$  NMR spectrum (100 MHz) of synthetic **21** in  $\text{CDCl}_3$ .



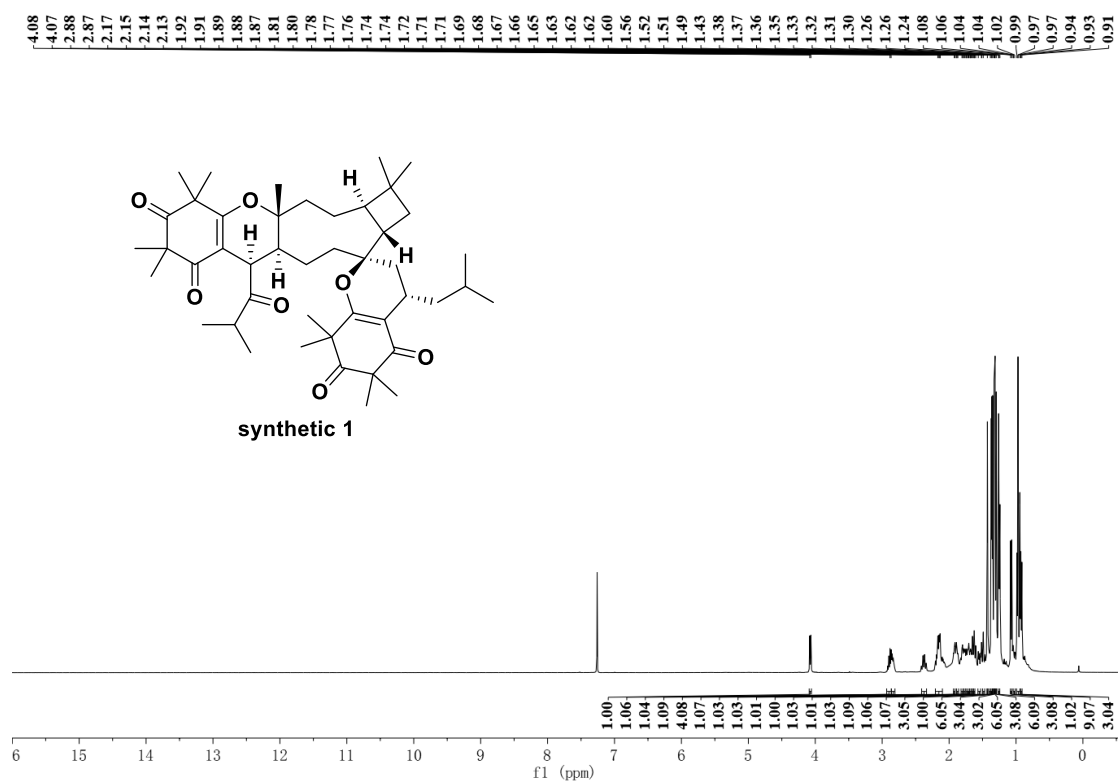

Figure S97.  $^1\text{H}$  NMR spectrum (400 MHz) of synthetic 1 through path B in  $\text{CDCl}_3$ .

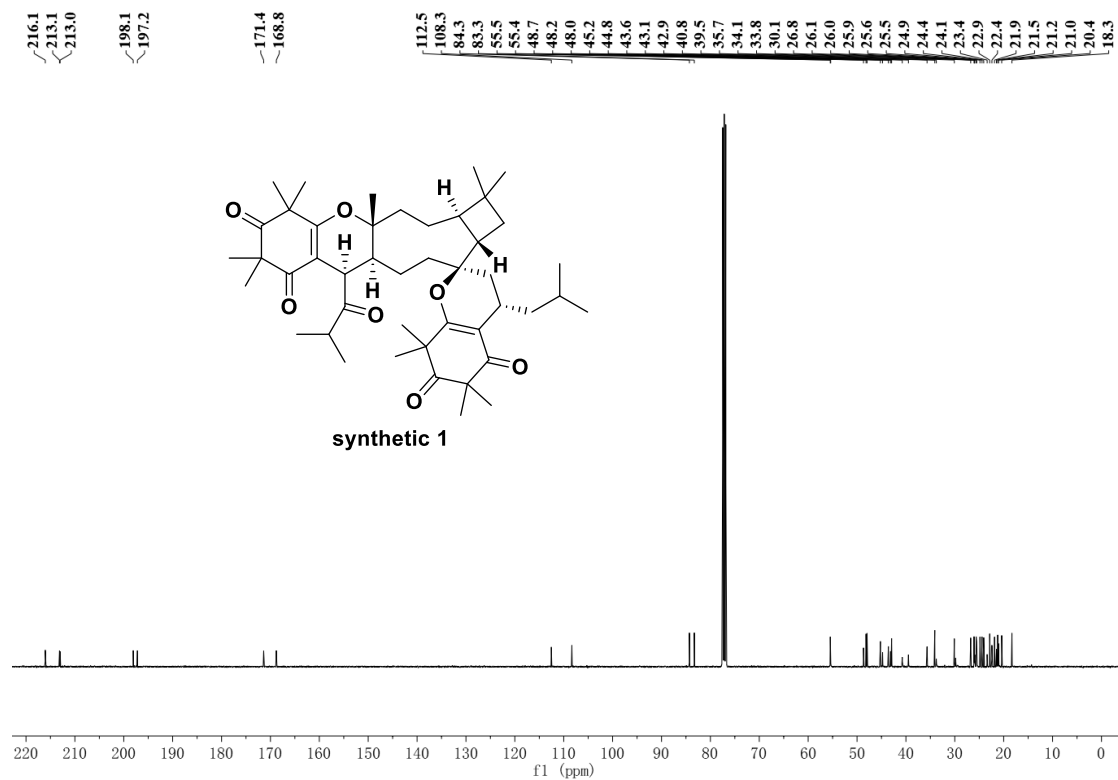

Figure S98.  $^{13}\text{C}$  NMR spectrum (100 MHz) of synthetic 1 through path B in  $\text{CDCl}_3$ .

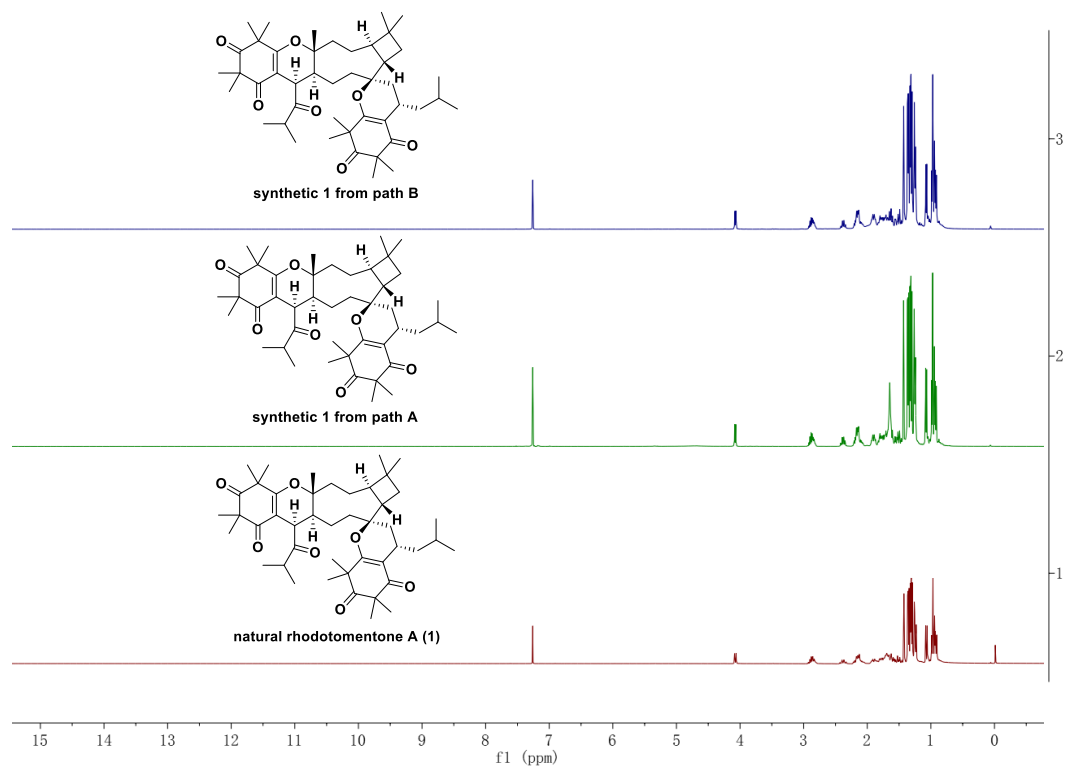

**Figure S99.** Comparison of  $^1\text{H}$  NMR spectra between synthetic and natural **1**.

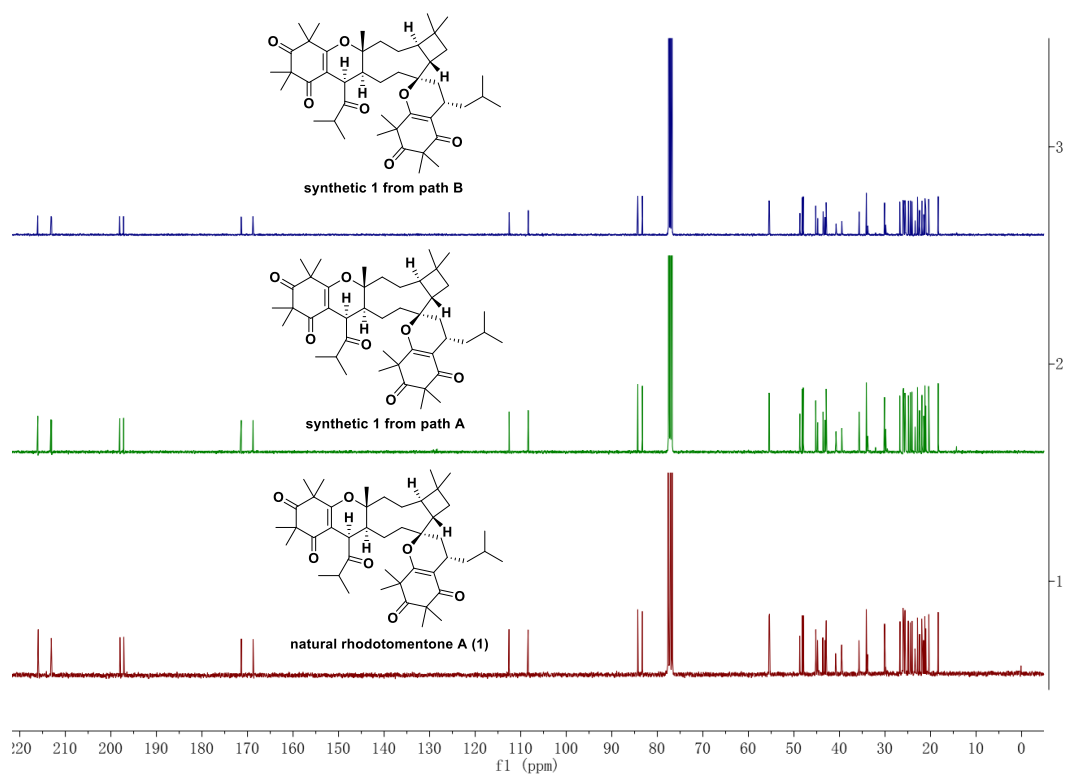

**Figure S100.** Comparison of  $^1\text{H}$  NMR spectra between synthetic and natural **1**.



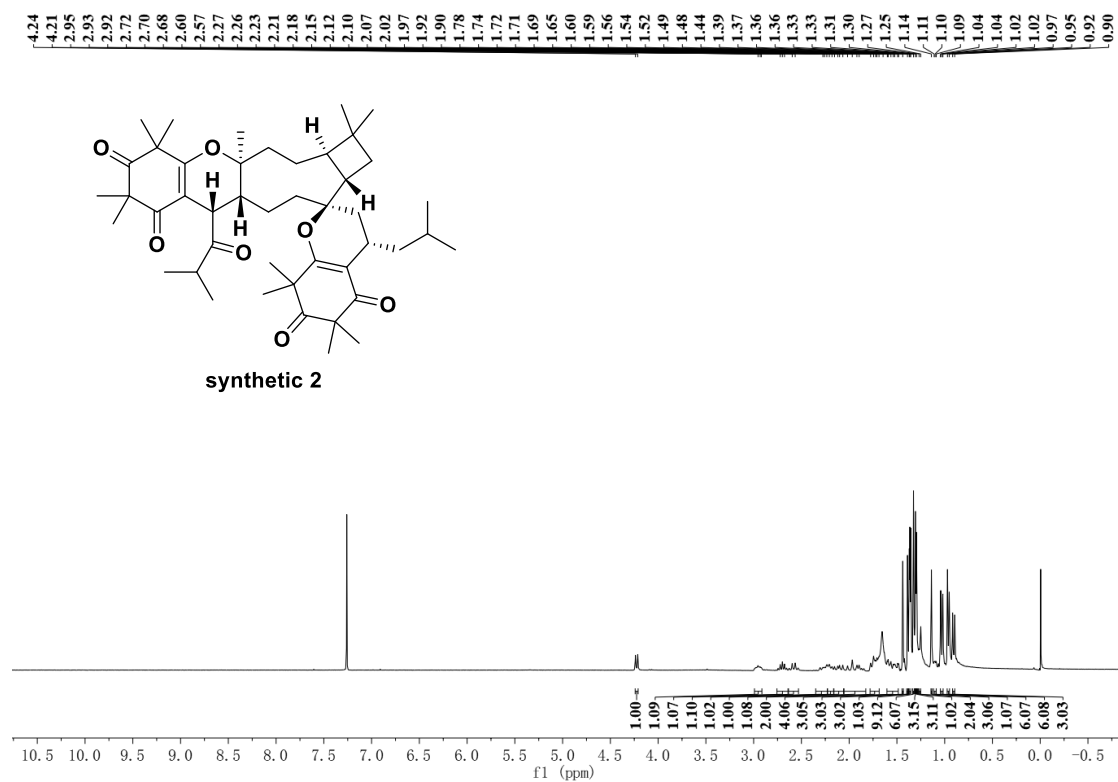

Figure S101.  $^1\text{H}$  NMR spectrum (400 MHz) of synthetic **2** through path A in  $\text{CDCl}_3$ .

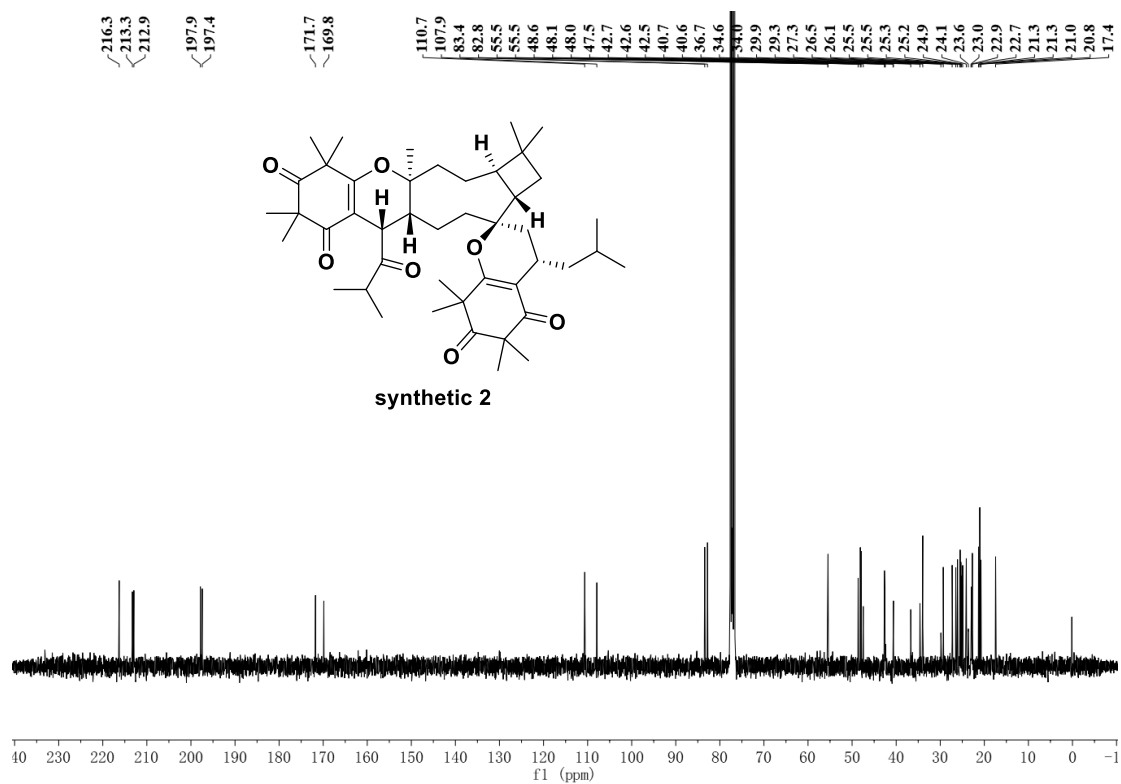

Figure S102.  $^{13}\text{C}$  NMR spectrum (100 MHz) of synthetic **2** through path A in  $\text{CDCl}_3$ .

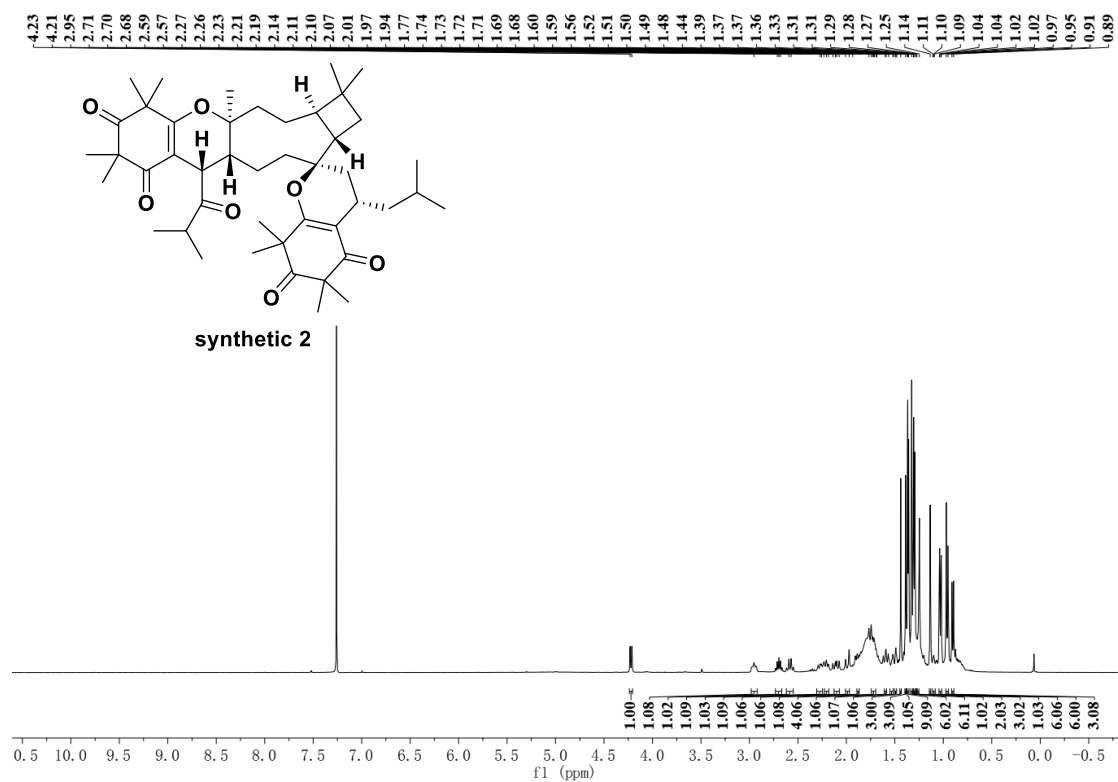

Figure S103. <sup>1</sup>H NMR spectrum (400 MHz) of synthetic 2 through path B in CDCl<sub>3</sub>.

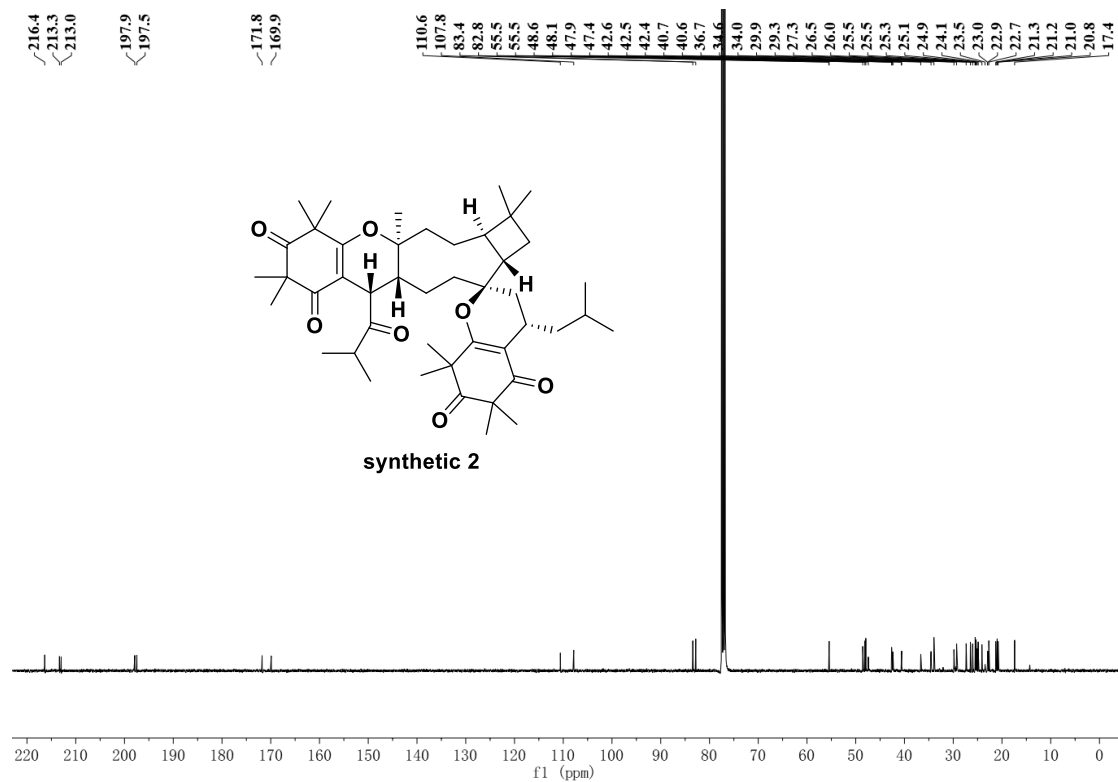

Figure S104. <sup>13</sup>C NMR spectrum (100 MHz) of synthetic 2 through path B in CDCl<sub>3</sub>.

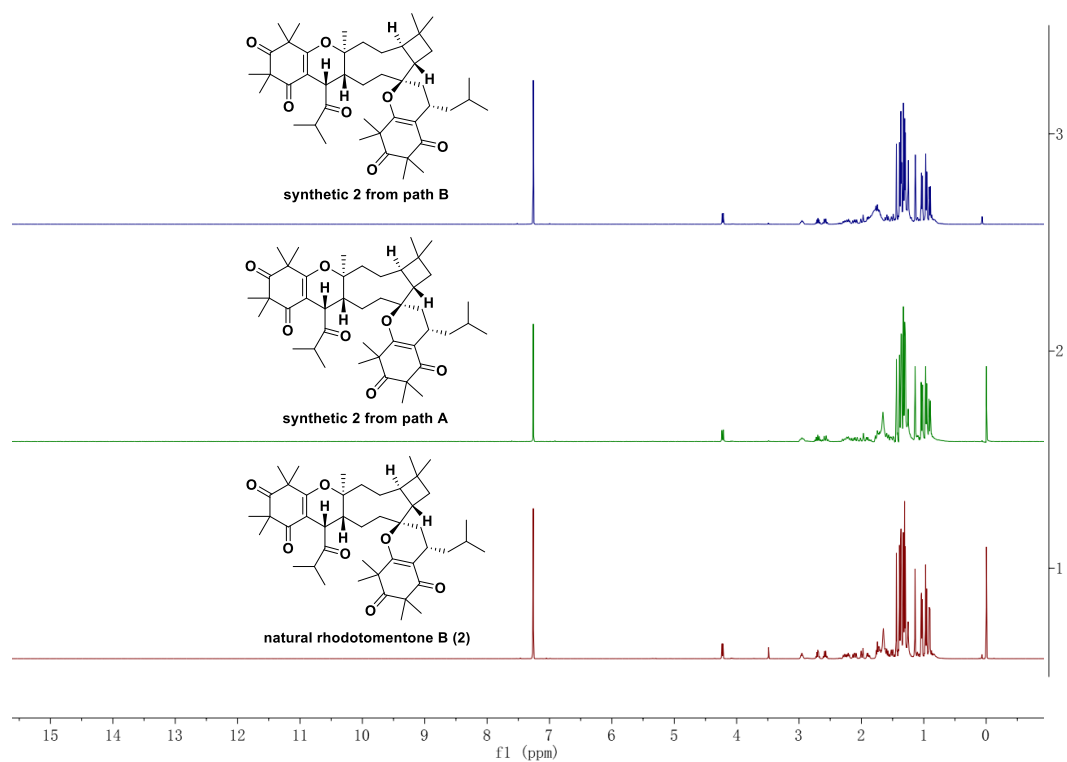

**Figure S105.** Comparison of  $^1\text{H}$  NMR spectra between synthetic and natural **2**.

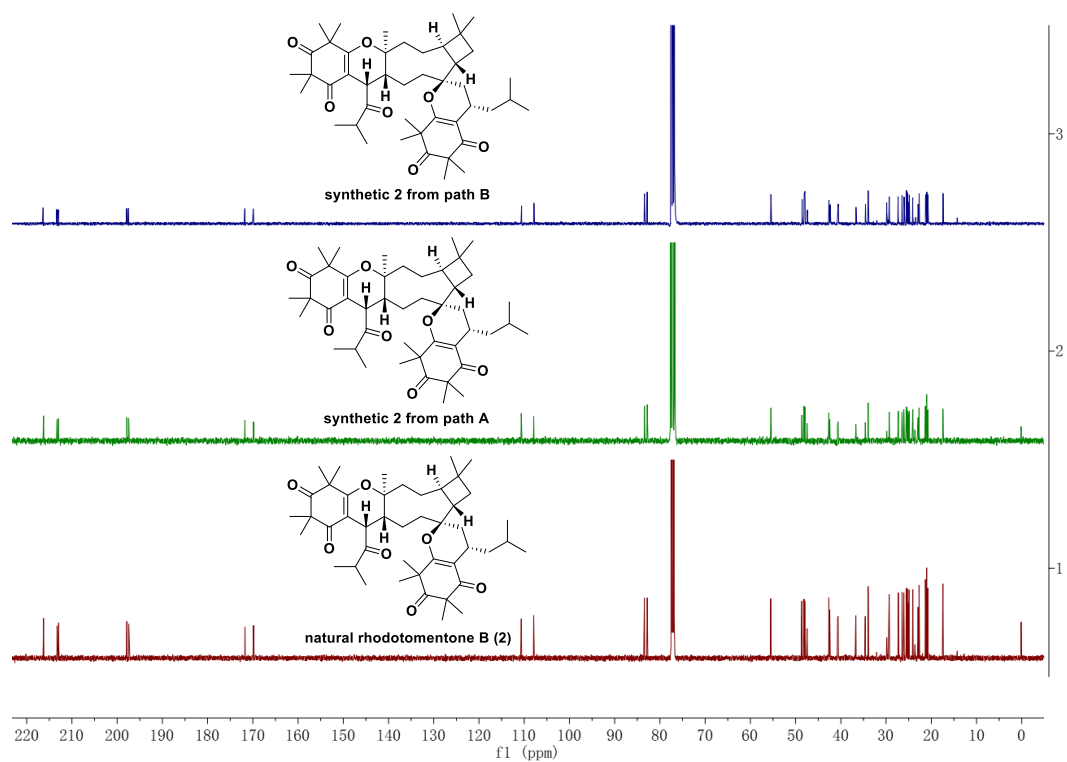

**Figure S106.** Comparison of  $^{13}\text{C}$  NMR spectra between synthetic and natural **2**.

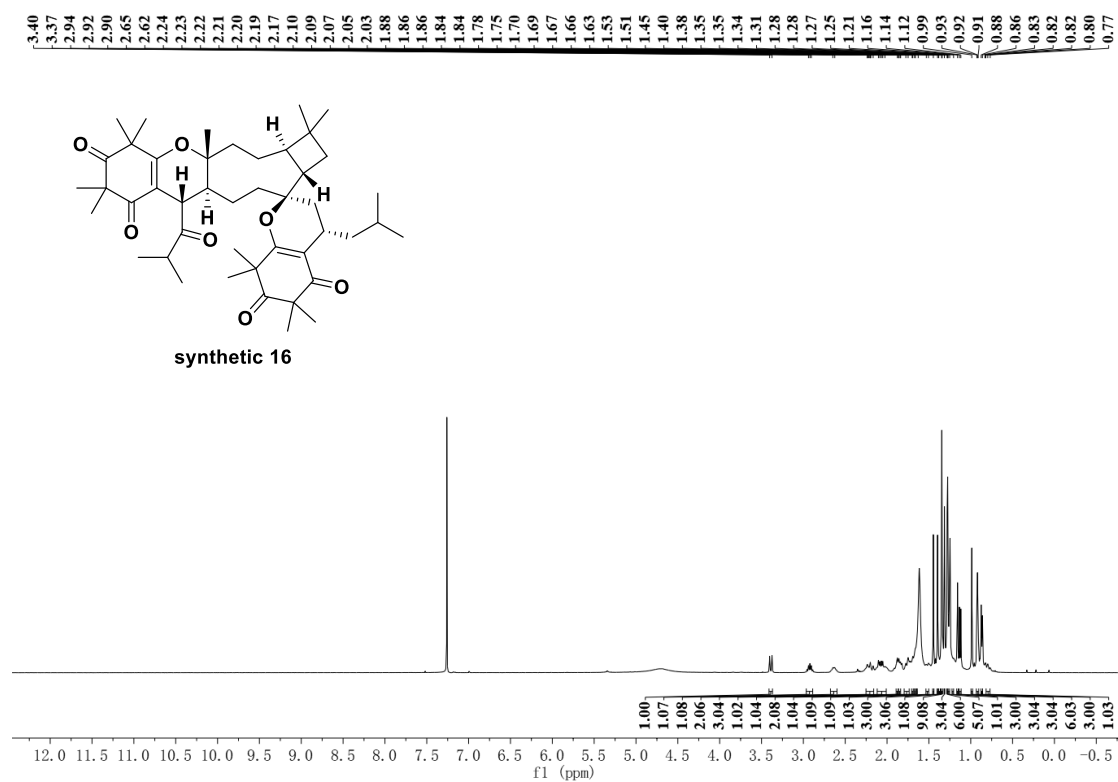

Figure S107.  $^1\text{H}$  NMR spectrum (400 MHz) of synthetic **16** through path A in  $\text{CDCl}_3$ .

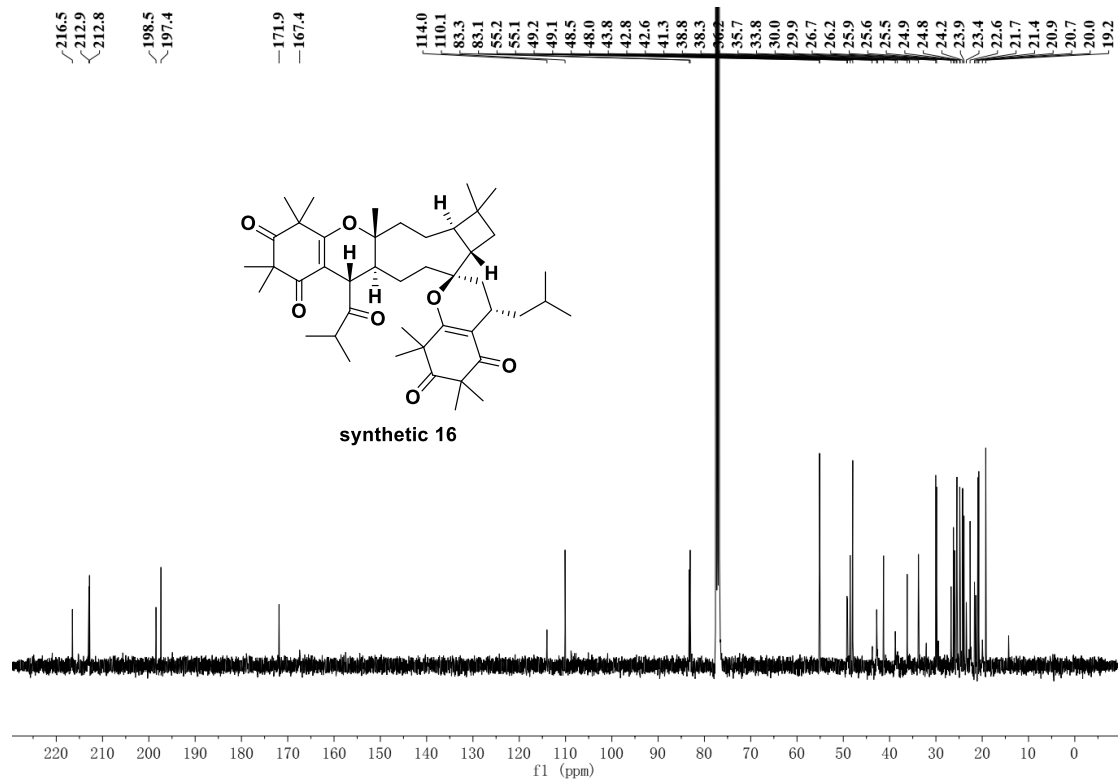

Figure S108.  $^{13}\text{C}$  NMR spectrum (100 MHz) of synthetic **16** through path A in  $\text{CDCl}_3$ .

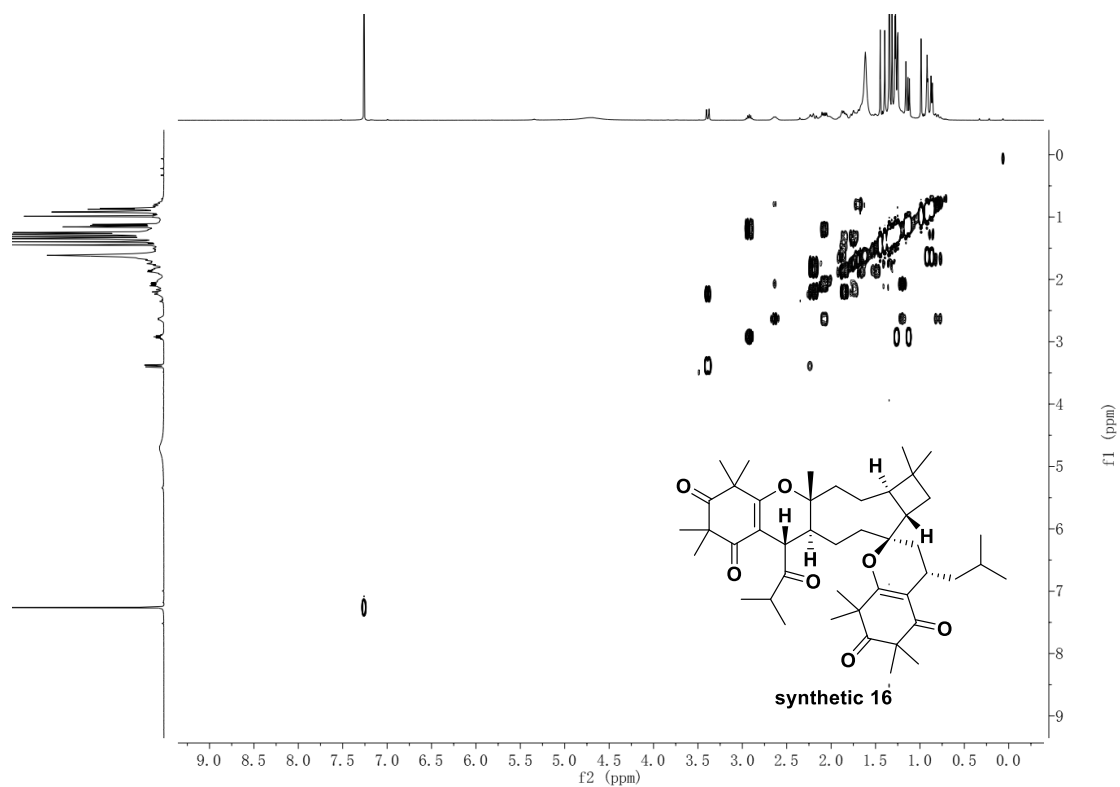

**Figure S109.**  $^1\text{H}$ - $^1\text{H}$  COSY spectrum of synthetic **16** through path A in  $\text{CDCl}_3$ .

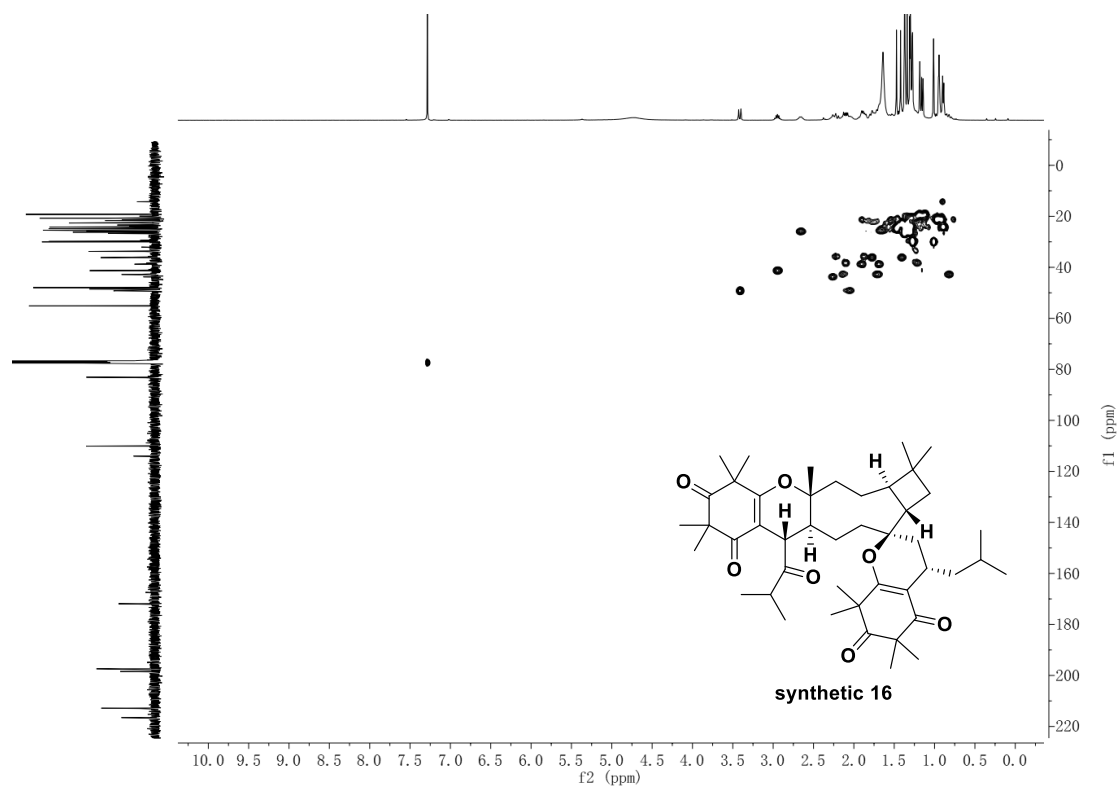

**Figure S110.** HSQC spectrum of synthetic **16** through path A in  $\text{CDCl}_3$ .

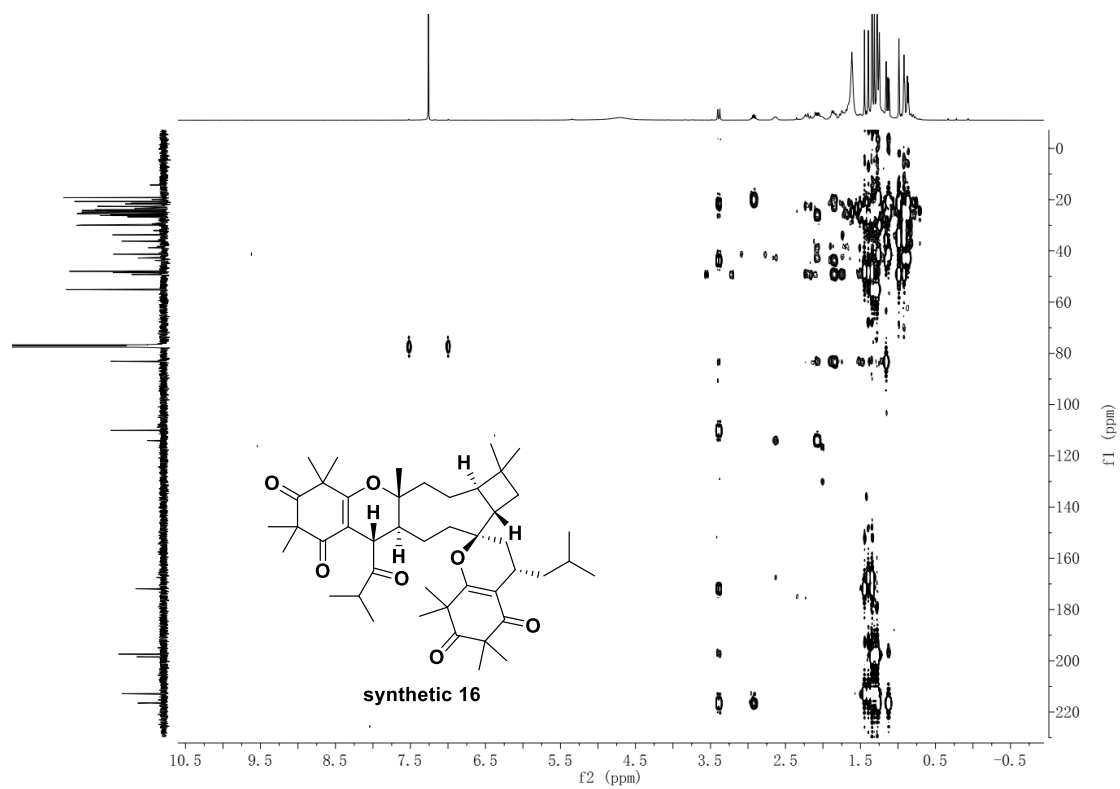

**Figure S111.** HMBC spectrum of synthetic **16** through path A in  $\text{CDCl}_3$ .

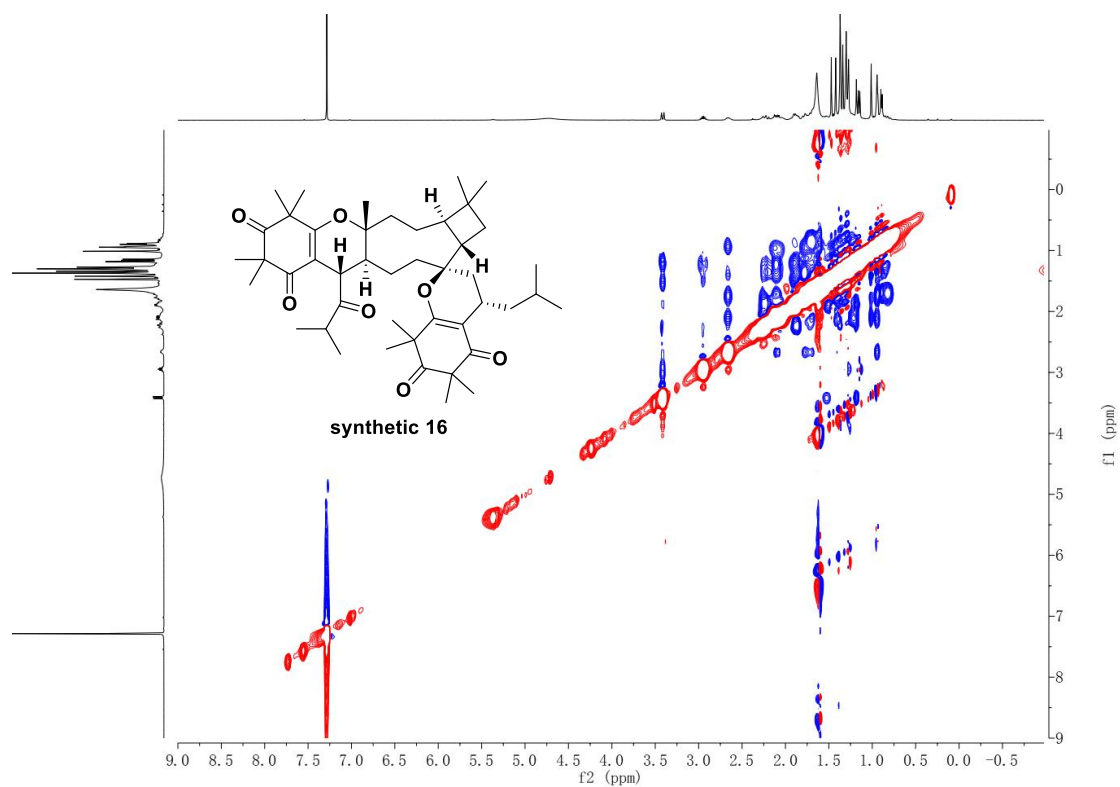

**Figure S112.** NOESY spectrum of synthetic **16** through path A in  $\text{CDCl}_3$ .

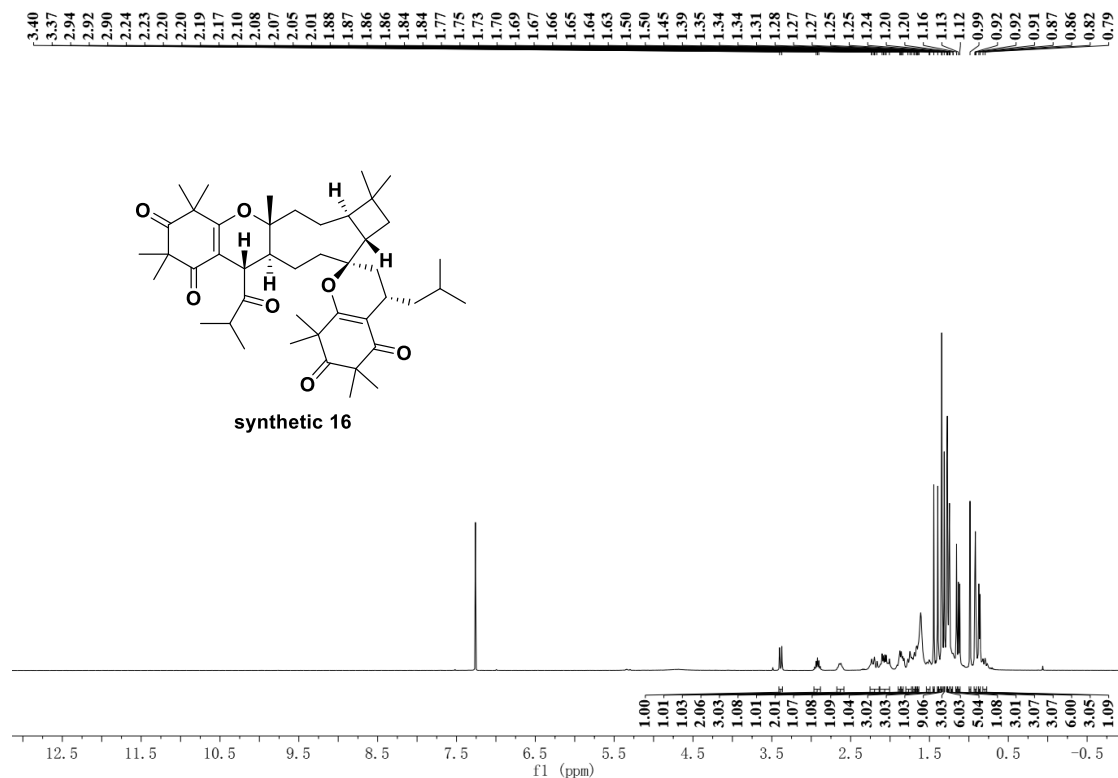

Figure S113. <sup>1</sup>H NMR spectrum (400 MHz) of synthetic **16** through path B in CDCl<sub>3</sub>.

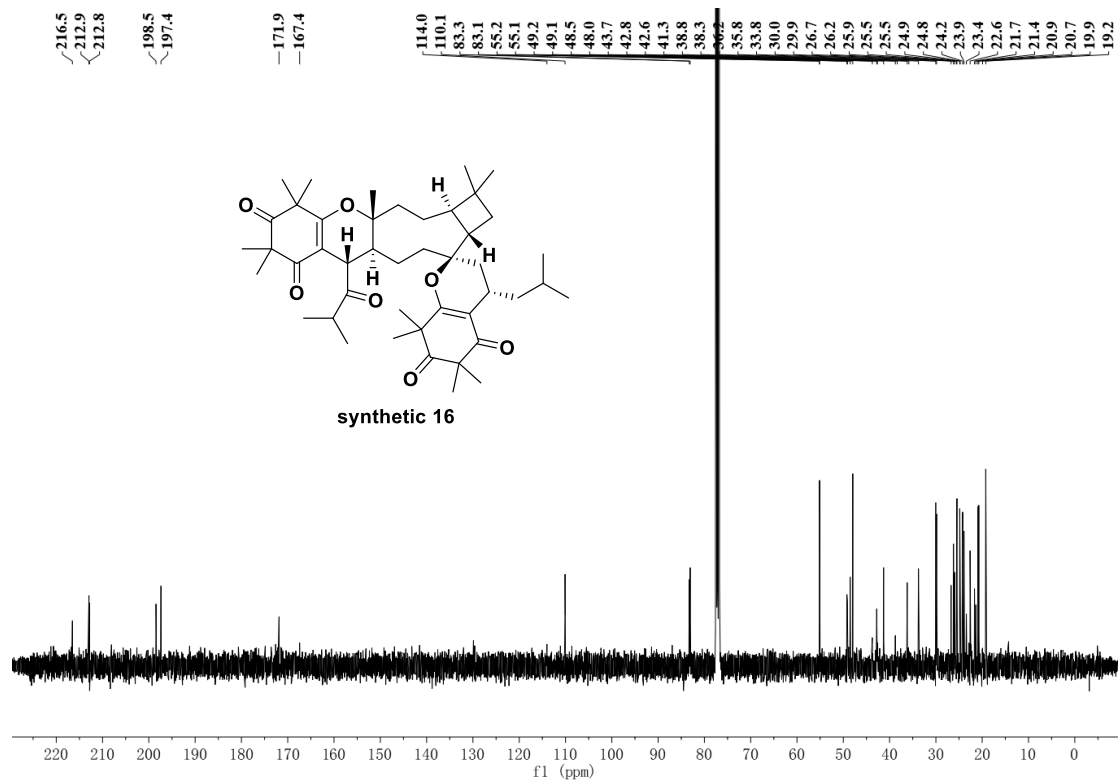

Figure S114. <sup>13</sup>C NMR spectrum (100 MHz) of synthetic **16** through path B in CDCl<sub>3</sub>.

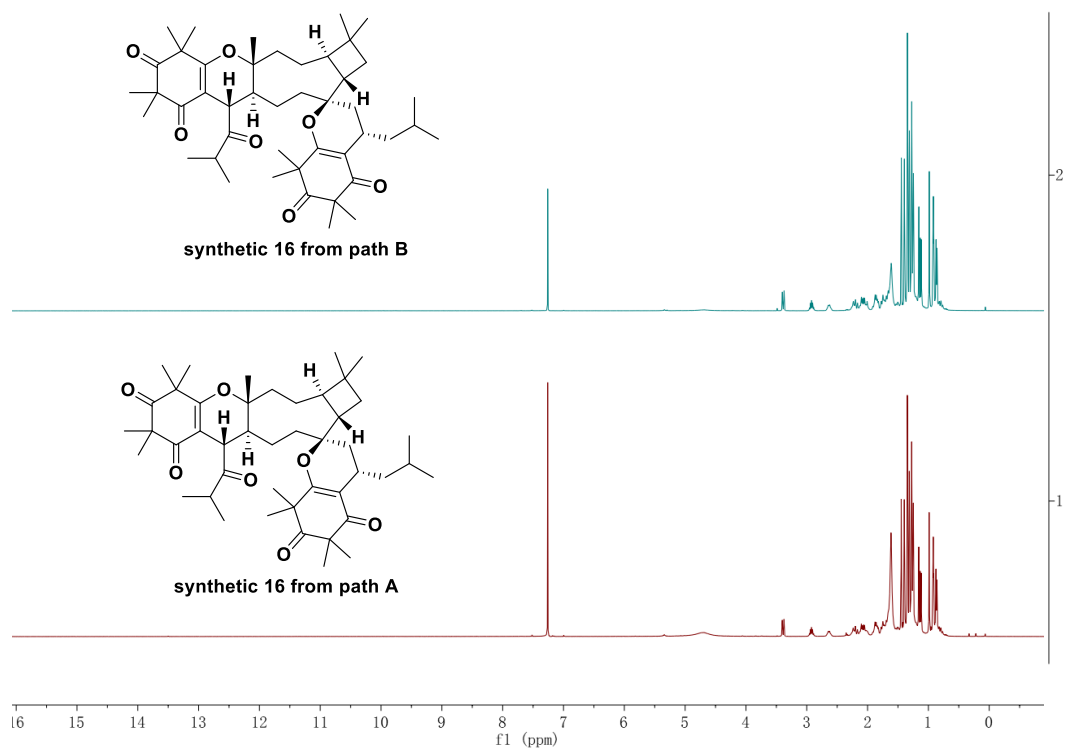

**Figure S115.** Comparison of  $^1\text{H}$  NMR spectra between synthetic **16** through paths A and B.

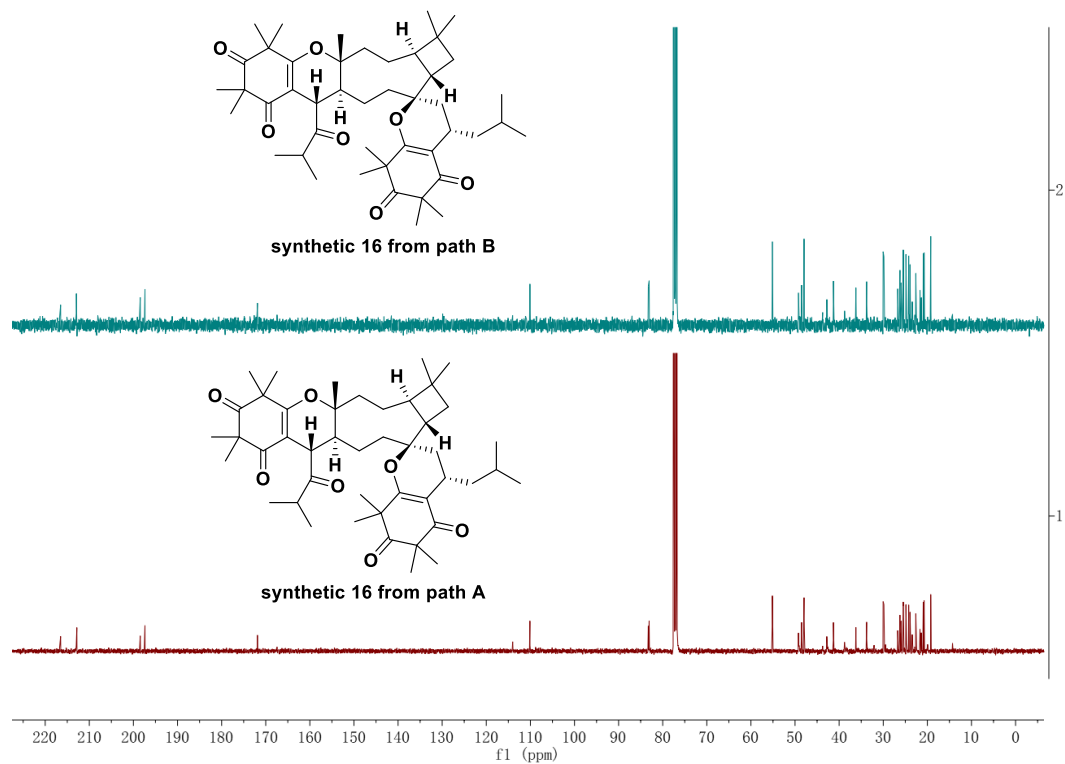

**Figure S116.** Comparison of  $^{13}\text{C}$  NMR spectra between synthetic **16** through paths A and B.



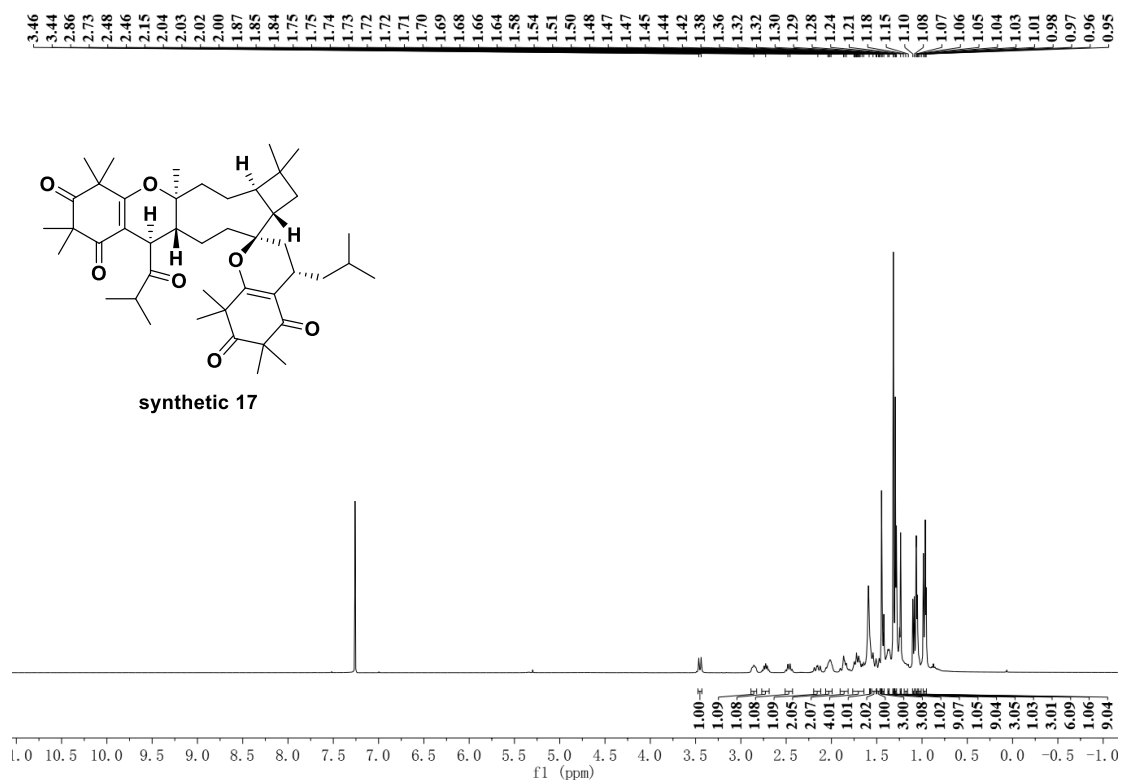

Figure S117.  $^1\text{H}$  NMR spectrum (400 MHz) of synthetic **17** through path A in  $\text{CDCl}_3$ .

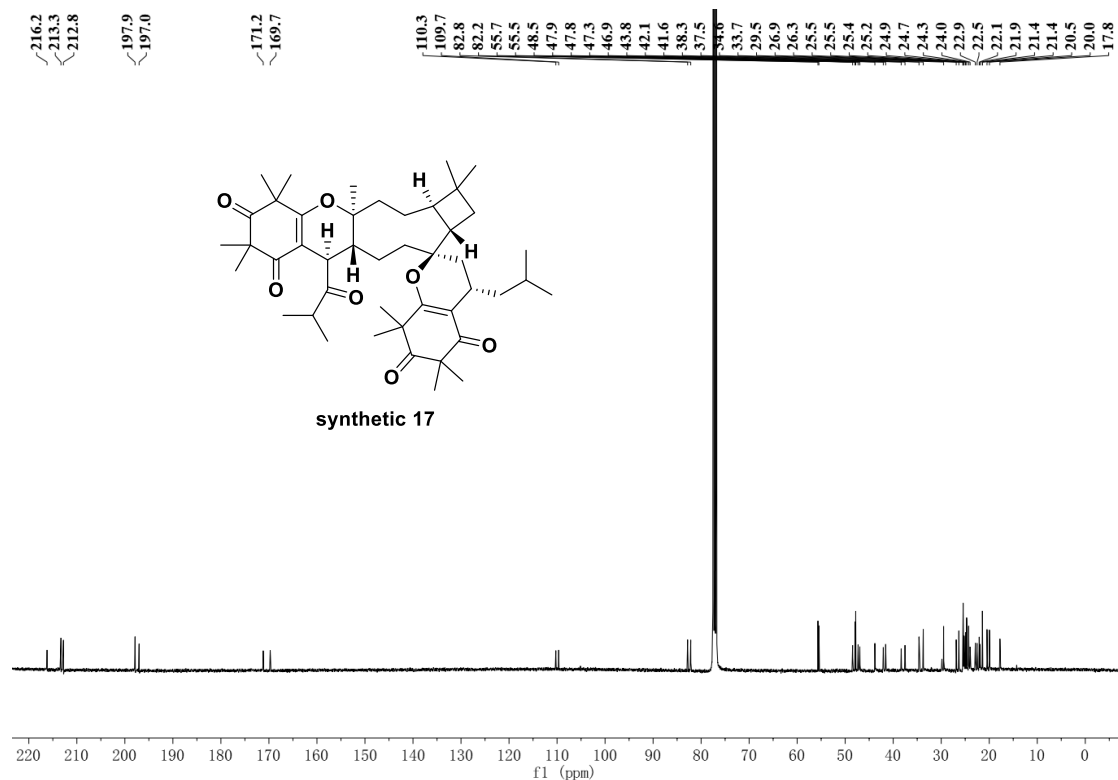

Figure S118.  $^{13}\text{C}$  NMR spectrum (100 MHz) of synthetic **17** through path A in  $\text{CDCl}_3$ .

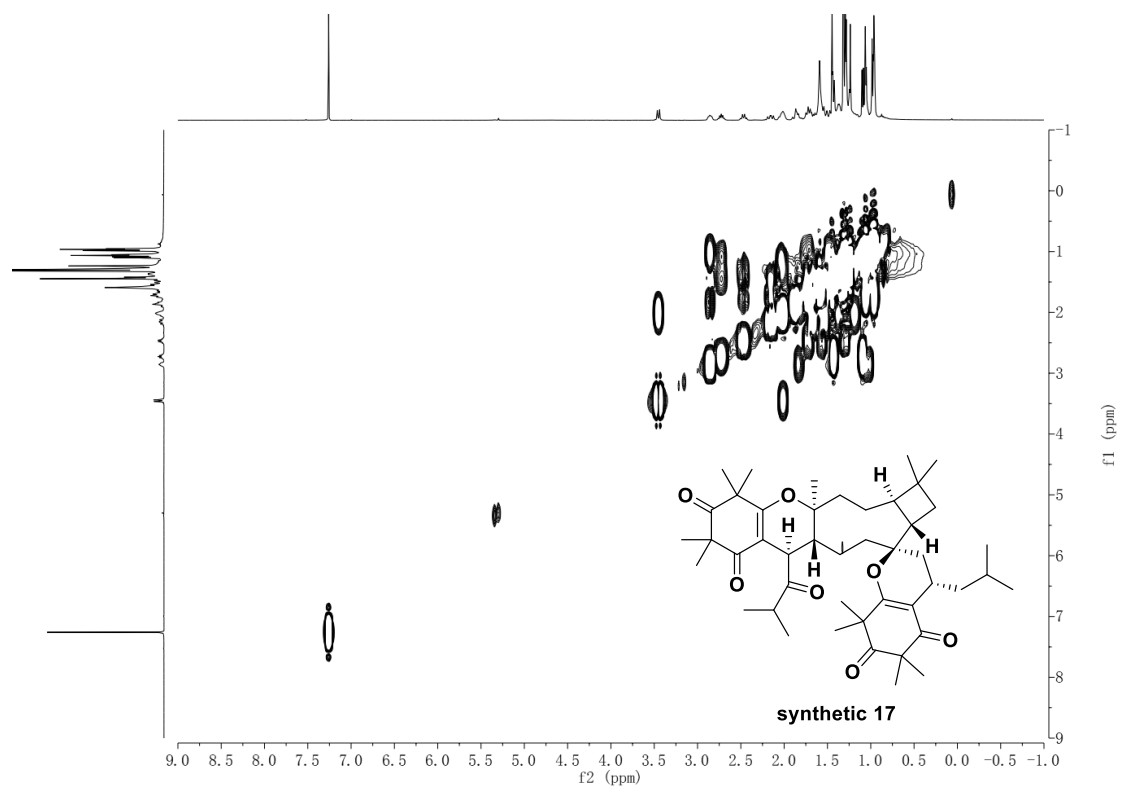

**Figure S119.**  $^1\text{H}$ - $^1\text{H}$  COSY spectrum of synthetic **17** through path A in  $\text{CDCl}_3$ .

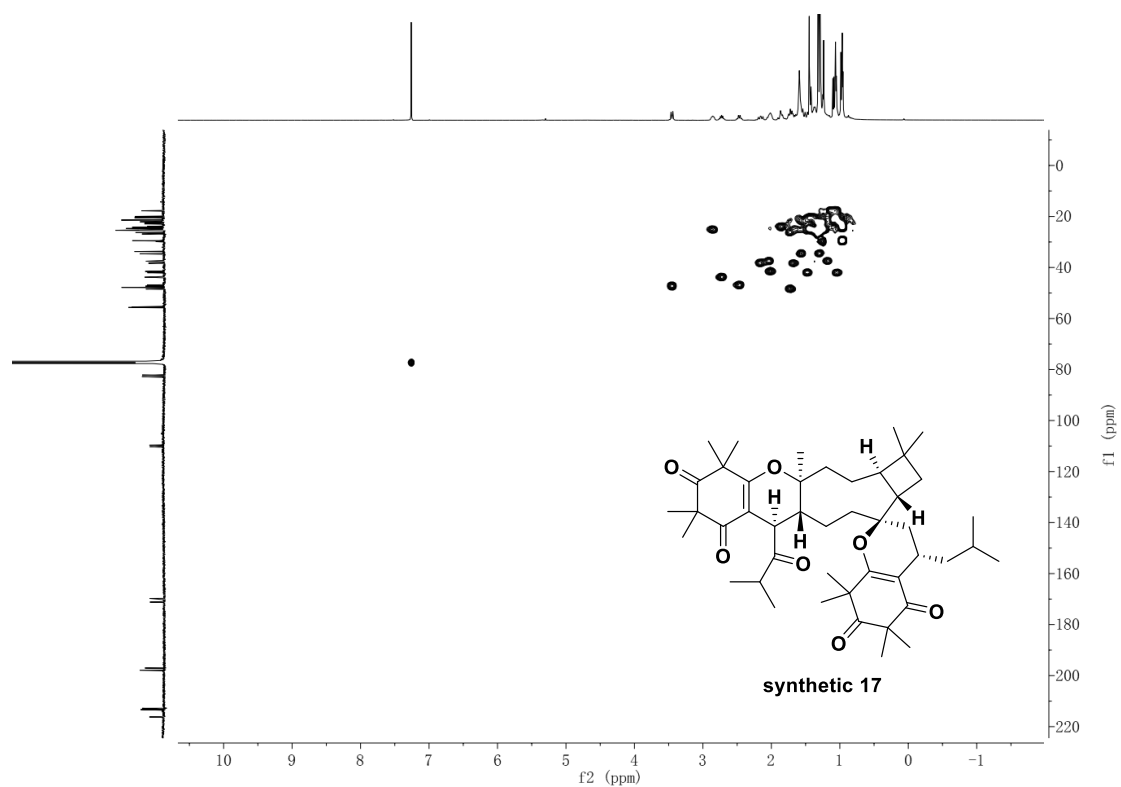

**Figure S120.** HSQC spectrum of synthetic **17** through path A in  $\text{CDCl}_3$ .

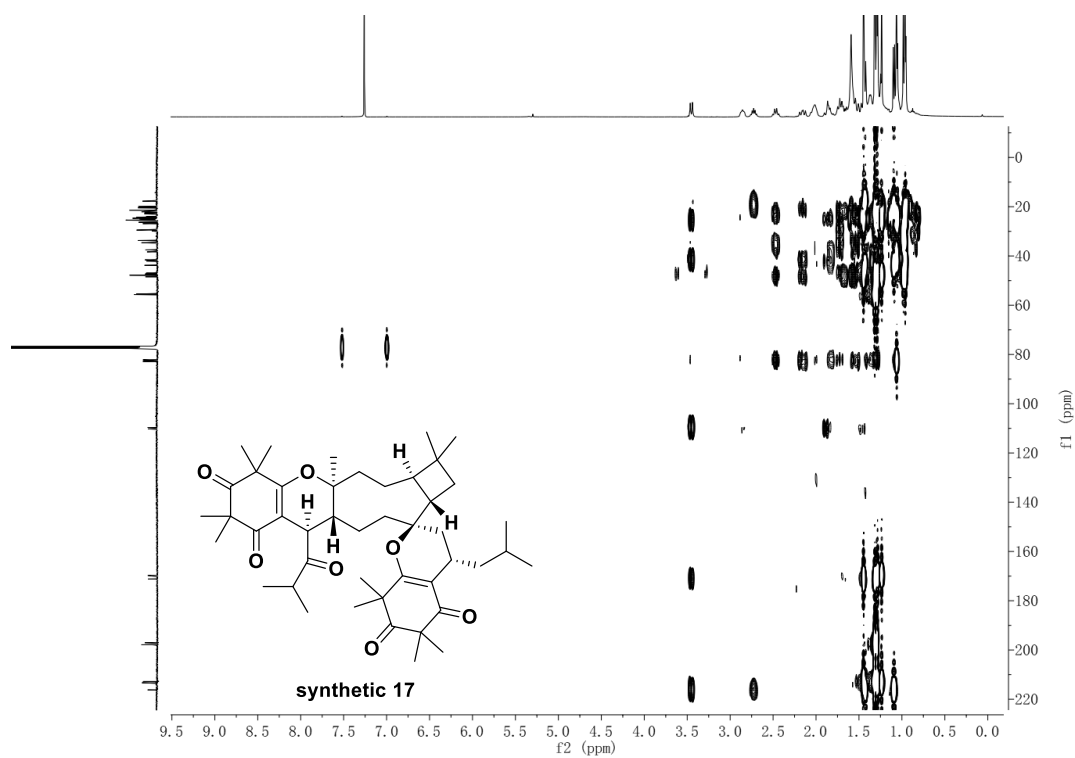

Figure S121. HMBC spectrum of synthetic **17** through path A in CDCl<sub>3</sub>.

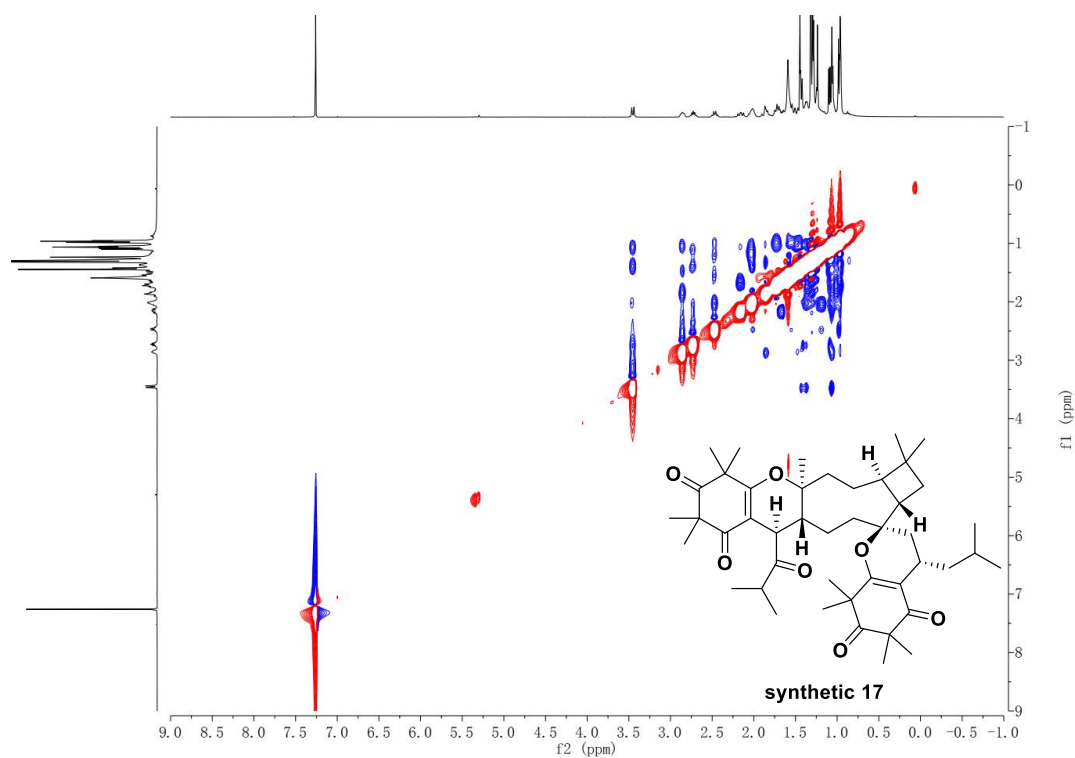

Figure S122. NOESY spectrum of synthetic **17** through path A in CDCl<sub>3</sub>.

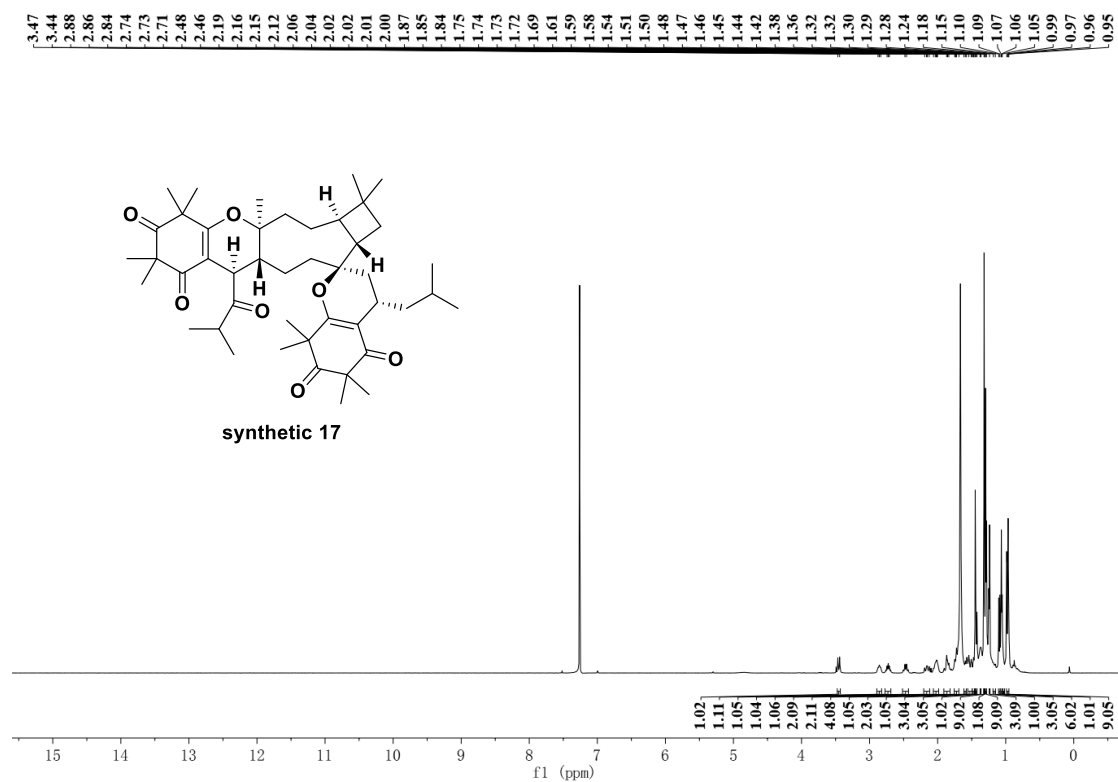

Figure S123.  $^1\text{H}$  NMR spectrum (400 MHz) of synthetic **17** through path B in  $\text{CDCl}_3$ .

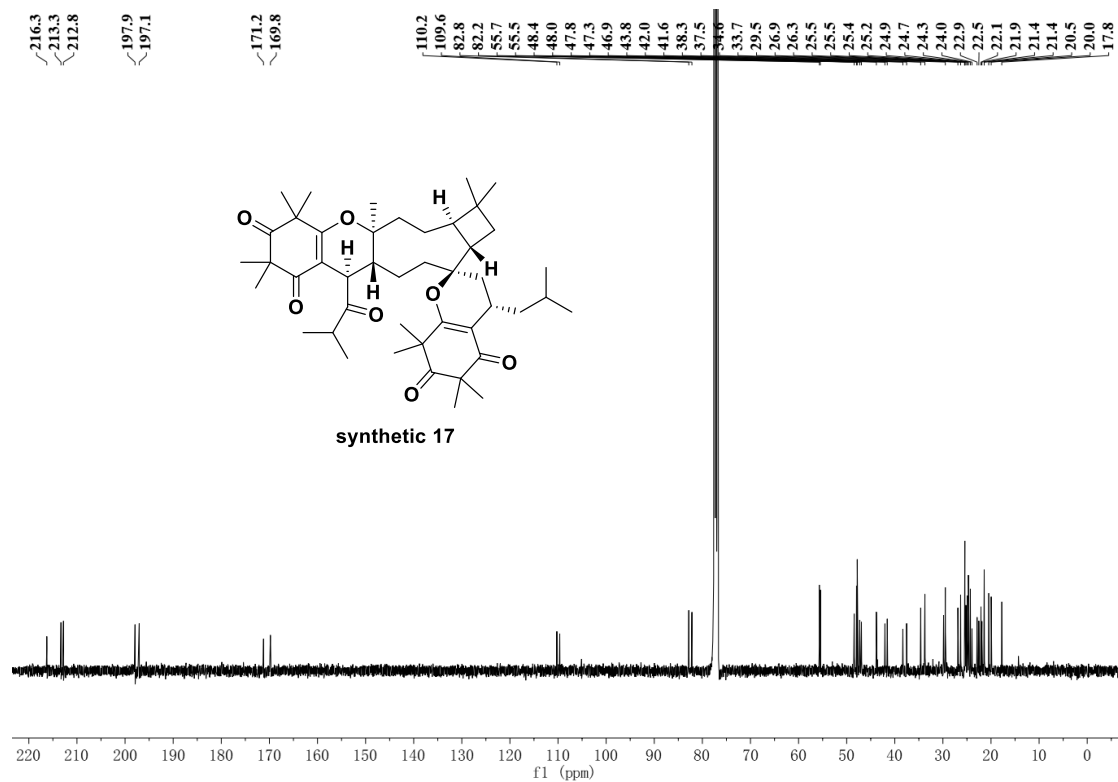

Figure S124.  $^{13}\text{C}$  NMR spectrum (100 MHz) of synthetic **17** through path B in  $\text{CDCl}_3$ .

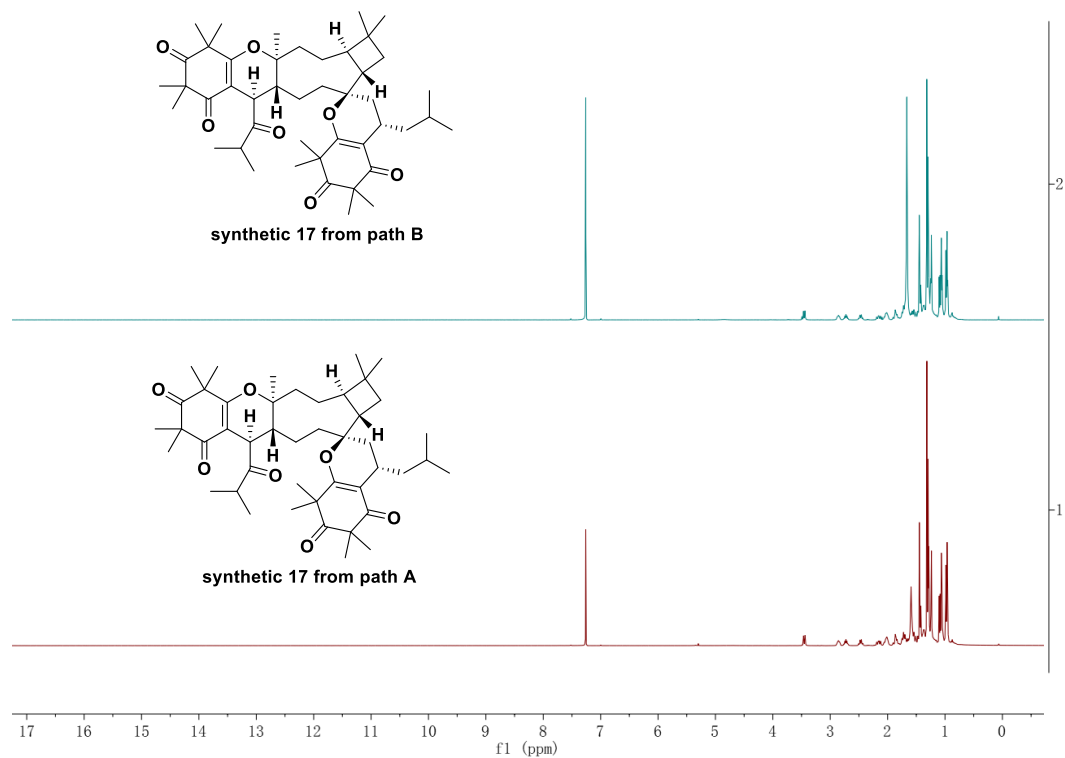

**Figure S125.** Comparison of  $^1\text{H}$  NMR spectra between synthetic **17** through paths A and B.

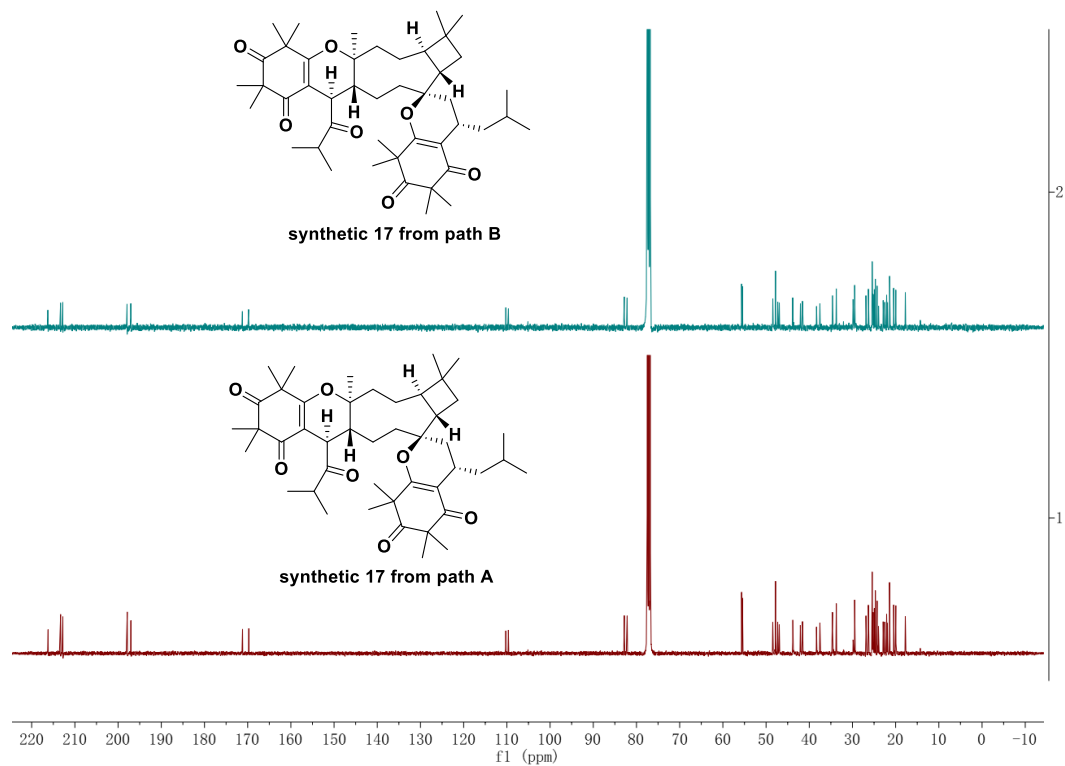

**Figure S126.** Comparison of  $^{13}\text{C}$  NMR spectra between synthetic **17** through paths A and B.

## References

- (1) Gaussian 09, Revision A.02, Frisch, M. J.; Trucks, G. W.; Schlegel, H. B.; Scuseria, G. E.; Robb, M. A.; Cheeseman, J. R.; Scalmani, G.; Barone, V.; Mennucci, B.; Petersson, G. A.; Nakatsuji, H.; Caricato, M.; Li, X.; Hratchian, H. P.; Izmaylov, A. F.; Bloino, J.; Zheng, G.; Sonnenberg, J. L.; Hada, M.; Ehara, M.; Toyota, K.; Fukuda, R.; Hasegawa, J.; Ishida, M.; Nakajima, T.; Honda, Y.; Kitao, O.; Nakai, H.; Vreven, T.; Montgomery, J. A., Jr.; Peralta, J. E.; Ogliaro, F.; Bearpark, M.; Heyd, J. J.; Brothers, E.; Kudin, K. N.; Staroverov, V. N.; Keith, T.; Kobayashi, R.; Normand, J.; Raghavachari, K.; Rendell, A.; Burant, J. C.; Iyengar, S. S.; Tomasi, J.; Cossi, M.; Rega, N.; Millam, J. M.; Klene, M.; Knox, J. E.; Cross, J. B.; Bakken, V.; Adamo, C.; Jaramillo, J.; Gomperts, R.; Stratmann, R. E.; Yazyev, O.; Austin, A. J.; Cammi, R.; Pomelli, C.; Ochterski, J. W.; Martin, R. L.; Morokuma, K.; Zakrzewski, V. G.; Voth, G. A.; Salvador, P.; Dannenberg, J. J.; Dapprich, S.; Daniels, A. D.; Farkas, O.; Foresman, J. B.; Ortiz, J. V.; Cioslowski, J.; Fox, D. J. Gaussian, Inc., Wallingford CT, **2009**.
- (2) Bruhn, T.; Schaumlöffel, A.; Hemberger, Y.; Pescitelli, G. SpecDis version 1.70, Berlin, Germany, **2017**.
